# Supplementary material for: A retrospective study of real-world effectiveness and safety of rivaroxaban in patients with non-valvular atrial fibrillation and venous thromboembolism in Saudi Arabia
Source: PeerJ. 2022 Sep 9;10:e13974. doi: 10.7717/peerj.13974 (PMC9466595; doi:10.7717/peerj.13974)
Supplement: Supplemental Information 1 [file peerj-10-13974-s001.xlsx]

## Sheet: Sheet1
MRN	Order Sentence	Dose (mg/day)	Age	Sex	Weight	Height	BMI	Smoking Hx	Allergy	VTE Hx (Yes,No)	If yes, Date of Onset	If yes, type?	NVAF Hx, (Yes,No)	If yes, Date of Onset	If yes, Type?	Anticoagulant	Antiplatlets	Comorbidities, DM,HTN, ….	ALT	AST	ALP	Albumin	Bilirubin	SrCr	CrCl	Child Pugh score	D dimer	CHADS2	‎CHA2DS2-VASc	HAS-BLED	Rec.thromb.	Rec. stroke	MI	Major bleeding	Non major bleeding	HTN	DLD	hypothyrodism	kidney dysfunction	HF	DM		Major bleeding	Non major bleeding
00-75-51-28	rivaroxaban 10 mg/ 1 tab(s) Oral Daily	10	16	F	64	1.48	29.2184	NO	NKA	NO	NONE	NONE	NONE	NONE	NONE	RIVA	NO	IN 2017 SHE DIDI SURGICAL CORRECTION TO THE KEFT FOOT	35	14	99	34	12	85	114.112	NONE	NONE	NONE	NONE	NONE	0	0	0	0	0	0	0	0	0	0	0		ACTIVE NASAL BLEEDING	NONE
00-80-10-74	rivaroxaban 10 mg/ 1 tab(s) Oral Daily	10	16	M	33	1.49	14.8642	NO	HEPARIN	NO	NONE	NONE	NONE	NONE	NONE	RIVA	NO	CHARCOT MARIE TOOTH SYNDROME, OSA, EPILEPSY, WHEEL CHAIR BOUND, PEG TUBE FEEDING	35	14	99	34	12	85	58.8392	NONE	NONE	NONE	NONE	NONE	0	0	0	0	0	0	0	0	0	0	0		extrdural haemorrhage , subarachnoid haemorrhage	NONE
10-02-21-63	10 mg daily	10	17	male	73	1.7	25.2595	NO	NKA	no			no			rivaroxaban	None	right flat foot reconstruction and excision of fibrous talocalcacaneal coalition	16	16	266	38.06	6.53	41	267.667	NONE	NONE	NONE	NONE	NONE	0	0	0	0	0	0	0	0	0	0	0		GI	NONE
00-86-72-79	10 mg, Oral, Daily	10	17	male	40	1.3	23.6686	NO	NKA	yes	42884	DVT left iliofemoral	no			rivaroxaban	None	Hereditary ataxia, epilepsy,	10	12	198	38.06	7.64	22	273.333	NONE	NONE	NONE	NONE	NONE	0	0	0	0	0	0	0	0	0	0	0		GI	NONE
00-90-17-27	20 mg, Oral, Daily	20	17	female	80	1.62	30.4832	NO	NKA	no			no	2019		rivaroxaban	None	SMA, carpal tunnel, Mouth breathing with nasal obstruction, Nasal obstruction present	22	228	40	20.3	100.03	121	99.3939	NONE	NONE	NONE	NONE	NONE	0	0	0	0	0	0	0	0	0	0	0		GI	NONE
10-20-84-15	rivaroxaban 20 mg/ 1 tab(s) Oral Daily	20	17	F	51.6	1.65	18.9532	NO	NKA	NO	NONE	NONE	yes	Since age of 4months		Rivaroxaban	Aspirin	DCMP SINCE AGE OF 4 MONTHS, MVR AT AGE 12, RECURRENT VALVE THROMBOSIS,	22	22	105	36.06	5.49	55	141.04	None	None	None	None	None	0	0	0	0	0	0	1	1	0	1	1		GI bleed	NONE
00-72-99-81	rivaroxaban 20 mg/ 1 tab(s) Oral Daily	20	17	F	101	1.66	36.6526	NO	EGGPLANT,TOMATO, EGG	NO	NONE	NONE	NONE	NONE	NONE	RIVA	NO	BILATERAL SEGMENTAL PE, EPILEPSY, OBESITY	19	21	103	36.29	10.51	85	178.631	NONE	NONE	NONE	NONE	NONE	0	0	0	0	0	0	0	0	0	0	0		GI bleeding	NONE
00-69-60-40	rivaroxaban15MG BID THEN 20 mg/ 1 tab(s) Oral Daily	20	17	M	118	1.8	36.4198	NO	NKA	NO	NONE	NONE	NONE	NONE	NONE	RIVA	NO	EPILEPSY, DVT	35	14	99	34	12	85	208.698	NONE	NONE	NONE	NONE	NONE	0	0	0	0	0	0	0	0	0	0	0		GI bleeding	NONE
02-43-32-48	10 mg daily	10	18	female	64	1.57	25.9645	NO	NKA	no			no			rivaroxaban	None	asthma, knee trauma	18	16	109	38.73	13.28	49	194.757	NONE	NONE	NONE	NONE	NONE	0	0	0	0	0	0	0	0	0	0	0		GIT	NONE
10-22-97-16	10 mg daily	10	18	female	70	1.6	27.3437	NO	NKA	no			no			rivaroxaban	None	RTA	15	11	130	28.63	11.16	29	359.923	NONE	NONE	NONE	NONE	NONE	0	0	0	0	0	0	0	0	0	0	0		HEMORRHAGIC STROKE,	NONE
00-67-27-72	rivaroxaban 10 mg/ 1 tab(s) Oral Daily	10	18	M	100.5	1.79	31.3661	NO	NKA	NO	NONE	NONE	NONE	NONE	NONE	RIVA	NO	ANKLE FRACTURE	35	14	99	34	12	85	176.302	NONE	NONE	NONE	NONE	NONE	0	0	0	0	0	0	0	0	0	0	0		hemorrhagic transformation	NONE
00-77-44-61	rivaroxaban 10 mg/ 1 tab(s) Oral Daily	10	18	M	61.5	1.79	19.1942	NO	NKA	NO	NONE	NONE	NONE	NONE	NONE	RIVA	NO	LUPUS NEPHRITIS, SWELLING LL	19	28	69	23.52	17.38	65	141.082	NONE	NONE	NONE	NONE	NONE	0	0	0	0	0	0	0	0	0	0	0		lower GI bleeding	NONE
10-20-84-15	20 mg daily	20	18	female	55.4	1.76	17.8848	NO	NKA	yes		Valve thrombosis	no			rivaroxaban	Aspirin 81mg	DCNP, Underwent MVR ( metallic valve ) in 2013,Redo MVR (tissue valve) on 8/2019	16	20	113	37.99	53.52	82	100.741	NONE	NONE	NONE	NONE	NONE	0	0	0	0	0	0	0	0	0	0	0		Moderate to severe PV bleeding, aggrivated by Rivaroxiban	NONE
00-95-80-23	10 mg daily	10	19	male	90	1.73	30.0712	NO	NKA	no			no			rivaroxaban	None	FLAT FOOT	27	26	135	38	11.54	75	177.467	NONE	NONE	NONE	NONE	NONE	0	0	0	0	0	0	0	0	0	0	0		petechial hemorrhage	NONE
10-10-94-54	10 mg daily	10	19	male	85	1.67	30.478	NO	NKA	no			no			rivaroxaban	None	had hight speed RTA	19	11	91	41.34	7.05	63	199.533	NONE	NONE	NONE	NONE	NONE	0	0	0	0	0	0	0	0	0	0	0		pulmonary hemorrhage	NONE
10-21-81-33	10 mg daily	10	19	male	91	1.77	29.0466	NO	NKA	no			no			rivaroxaban	None	Post skin grafting bilateral, bilateral tibial fracture	15	12	171	34.24	2.83	61	220.621	NONE	NONE	NONE	NONE	NONE	0	0	0	0	0	0	0	0	0	0	0		PV bleeding	NONE
01-18-39-95	20 mg oral daily	20	19	male	60	1.6	23.4375	NO	vancomycin	no			no			rivaroxiban	None	#NAME?	42	28	190	36.78	9.62	82	108.211	NONE	NONE	NONE	NONE	NONE	0	0	0	0	0	1	1	0	0	0	1		SEVERE GI BLEEDING	NONE
01-15-77-69	20 mg oraly daily	20	19	female	53	1.47	24.5268	NO	vancomycin	yes		DVT,PE	NO			rivaroxiban	None	anxaity,crohn's ,potintail for infection	18	26	99	37.64	7.88	45	174.18	NONE	NONE	NONE	NONE	NONE	0	0	0	0	0	0	0	0	0	0	0		subconjunctival hemorrhage OS	NONE
00-98-55-35	0.5 tab 20 mg oral daily for 4 weeks	10	20	female	94	1.615	36.0398	NO	NKA	no			no			rivaroxaban	None	ITP	19	11	83	39	5.37	71	194.178	NONE	NONE	NONE	NONE	NONE	0	0	0	0	0	0	1	0	0	0	0		was admitted for GI bleeding	NONE
00-57-19-36	rivaroxaban 10 mg/ 1 tab(s) Oral Daily	10	20	F	77	1.45	36.6231	NO	NKA	NO	NONE	NONE	NONE	NONE	NONE	RIVA	NO	DOWN SYNDROME, T1DM , HYPOTHYROIDISM, BA,AI, REAT ERYTHEMA, POST LEFT ANKLE BI MAL. NON DISPLACED FRACTURE	32	18	201	21.68	23	138	81.8357	NONE	NONE	NONE	NONE	NONE	0	0	0	0	0	1	1	0	0	0	1		YES, PULMONARY HEMORRHAGE	NONE
00-69-70-45	rivaroxaban 10 mg/ 1 tab(s) Oral Daily	10	20	M	90	1.61	34.7209	NO	NKA	NO	NONE	NONE	NONE	NONE	NONE	RIVA	ASA	BUDD CGIARI SYNDROME	35	14	99	34	12	85	155.294	NONE	NONE	NONE	NONE	NONE	0	0	0	0	0	0	0	0	0	0	0		NONE	NONE
10-10-10-61	20 mg daily	20	20	male	123	1.65	45.1791	NO	Lentils, Soy Products, beans	no			no			rivaroxaban	None	Budd-Chiari Syndrome, failed 3 trials of IVC and hepatic vein angioplasty, G6PD deficiency, BA	24	14	91	34.94	88.39	79	228.354	NONE	NONE	NONE	NONE	NONE	0	0	0	0	0	1	0	0	0	0	0		NONE	NONE
10-09-11-26	20 mg daily	20	20	female	68	1.625	25.7515	NO	NKA	yes	2016	Rt leg DVT and B\L sub segmental PE	no			rivaroxaban	None	DVT, PE	22	11	72	38.93	5.79	40	249.333	NONE	NONE	NONE	NONE	NONE	0	0	0	0	0	0	0	0	0	0	0		NONE	NONE
10-19-86-81	20 mg daily	20	20	female	110.8	1.63	41.7027	NO	NKA	yes		Provoked right extensive iliofemoral DVT	no			rivaroxaban	None	DVT	16	9	82	26.44	6.29	59	275.435	NONE	NONE	NONE	NONE	NONE	0	0	0	0	0	0	0	0	0	0	0		NONE	NONE
01-08-77-85	20 mg daily	20	20	male	95	1.775	30.1527	NO	NKA	yes		Saggital vein thrombosis	no			rivaroxaban	None	Saggital vein thrombosis SLE with LN	101	43	101	45.63	4.91	72	193.519	NONE	NONE	NONE	NONE	NONE	0	0	0	0	0	0	0	0	0	0	0		NONE	NONE
10-05-14-73	10 mg daily	10	21	female	56.8	1.55	23.642	NO	NKA	no			no			rivaroxaban	None	POST RT FOOT RECONSTRUCTION	19	13	106	43	6.57	74	111.638	NONE	NONE	NONE	NONE	NONE	0	0	0	0	0	1	0	0	0	0	0		NONE	NONE
01-21-09-67	10 mg daily	10	21	female	63	1.725	21.172	NO	NKA	no			no			rivaroxaban	None		14	8	43	44.32	14.69	53	172.887	NONE	NONE	NONE	NONE	NONE	0	0	0	0	0	0	0	0	0	0	0		NONE	NONE
10-19-16-74	15 mg daily	15	21	female	75	1.62	28.578	NO	NKA	yes		DVT	no			rivaroxaban	None	DVT	26	18	122	38.79	4.34	45	242.407	NONE	NONE	NONE	NONE	NONE	0	0	0	0	0	0	0	0	0	0	0		NONE	NONE
01-12-33-97	20 mg daily	20	21	male	84	1.64	31.2314	no	NKA	yes		DVT	no			rivaroxaban	None	SCA	70	121	178	35.97	130.86	28	436.333	NONE	NONE	NONE	NONE	NONE	0	0	0	0	0	1	0	0	1	0	1		NONE	NONE
10-20-64-47	20 mg daily	20	21	female	48	1.5	21.3333	NO	wheat	no			no			rivaroxaban	None	HTN, IDA, DM, Doudenal ulcer, Coeliac disease	27	16	61	31.49	6.55	56	124.667	NONE	NONE	NONE	NONE	NONE	0	0	0	0	0	1	0	0	0	0	1		NONE	NONE
10-20-96-76	20 mg daily	20	21	male	80	1.6	31.25	NO	NKA	yes		PE	no			rivaroxaban	None		41	23	72	44.34	9.01	69	168.631	NONE	0.27	NONE	NONE	NONE	0	0	0	0	0	0	0	0	0	0	0		NONE	NONE
00-58-85-88	rivaroxaban 20 mg/ 1 tab(s) Oral Daily	20	21	M	70.5	1.7	24.3945	NO	NKA	Yes	RECURRENT	DVT, PE	NONE	NONE	NONE	RIVA	ASA	BAM RECURRENT DVT , PE, PARAPLEGIA, ANGIOEDEMA	35	14	99	34	12	85	120.633	NONE	NONE	NONE	NONE	NONE	0	0	0	0	0	0	0	0	0	0	0		NONE	NONE
00-50-82-12	rivaroxaban 20 mg/ 1 tab(s) Oral Daily	20	21	F	99	1.67	35.4979	NO	NKA	NO	NONE	NONE	NONE	NONE	NONE	RIVA	NO	PROVOKED SPLENIC THROMBOSIS	17	13	93	40.86	9.18	45	319.978	NONE	NONE	NONE	NONE	NONE	0	0	0	0	0	0	0	0	0	0	0		NONE	NONE
00-83-80-44	rivaroxaban 10 mg/ 1 tab(s) Oral Daily	10	22	M	65.1	1.64	24.2043	NO	NKA	NO	NONE	NONE	NONE	NONE	NONE	RIVA	NO	RESECTION OF BONE TUMUR	35	14	99	34	12	85	110.457	NONE	NONE	NONE	NONE	NONE	0	0	0	0	0	0	0	0	0	0	0		NONE	NONE
00-48-32-57	rivaroxaban 15 mg / 1 tab(s) Oral BID	15	22	M	77	1.62	29.34	NO	NKA	NO	NONE	NONE	NONE	NONE	NONE	RIVA	NO	DOWN SYNDROME , POST GASTRIC SLEEVE	35	14	99	34	12	85	130.648	NONE	NONE	NONE	NONE	NONE	0	0	0	0	0	0	0	0	0	0	0		NONE	NONE
00-47-13-65	rivaroxaban 15 mg / 1 tab(s) Oral Daily	15	22	F	108	1.61	41.6651	NO	NKA	NO	NONE	NONE	NONE	NONE	NONE	RIVA	ASA	HYPOTHROIDISM, CHRONIC LEFT MCA STROKE, SINGLE SYMPTOMATIC SEIZURE SECONDARY TO STROKE WITH HIGH RISK TO DEVELPED OTHER STROKE	17	11	72	41.09	11.12	81	192.296	NONE	NONE	NONE	NONE	NONE	0	0	0	0	0	0	0	1	0	0	0		NONE	NONE
10-07-27-63	20 mg daily	20	22	male	66	1.66	23.9512	NO	NKA	yes		UPPER LIMB DVT DUO TO CEPHALIC VEIN THROMBOSIS	no			rivaroxaban	None	DVT	60	28	100	46	41.55	72	132.204	NONE	NONE	NONE	NONE	NONE	0	0	0	0	0	1	0	0	0	0	1		NONE	NONE
10-17-32-66	20 mg daily	20	22	male	55	1.74	18.1662	NO	NKA	no			no			rivaroxaban	None	RT TESTICULAR TUMOR POST ORCHECTOMY, LEFT MODEFIED SELECTIVE NECK DISSECTION	23	10	71	42.99	16.93	84	94.4312	NONE	NONE	NONE	NONE	NONE	0	0	0	0	0	0	0	0	0	0	0		NONE	NONE
01-17-08-59	20 mg oral daily qpm	20	22	male	81	1.81	24.7245	NO	NKA	no			no			rivaroxiban	None	HOCM	26	14	99	44.4	4.51	130	89.8615	NONE	NONE	NONE	NONE	NONE	0	0	0	0	0	1	0	0	0	0	1		NONE	NONE
00-49-87-08	rivaroxaban 20 mg/ 1 tab(s) Oral Daily	20	22	F	87	1.68	30.8248	NO	NKA	Yes	2019	PE	NONE	NONE	NONE	RIVA	NO	PE, SHE WAS TAKEN 15 MG ONLY, SUB THERAPEEUTIC DOSE AND SHE HAD ANOTHER PE AND THEY STARTED ON WARFARIN	18	11	99	37.99	5.33	45	278.83	NONE	NONE	NONE	NONE	NONE	0	0	0	0	0	0	0	0	0	0	0		NONE	NONE
00-48-98-83	rivaroxaban 20 mg/ 1 tab(s) Oral Daily	20	22	M	76	1.68	26.9274	NO	NKA	Yes	2019	DVT	NONE	NONE	NONE	RIVA	NO	LL DVT	35	14	99	34	12	85	128.952	NONE	NONE	NONE	NONE	NONE	0	0	0	0	0	0	0	0	0	0	0		NONE	NONE
00-89-11-99	10 mg daily	10	23	male	68.4	1.81	20.8785	NO	infliximab	yes			no			rivaroxaban	None	UC PANCOLITIS REFRACTORY, DVT	42	25	94	40.76	11.3	83	117.846	NONE	NONE	NONE	NONE	NONE	0	0	0	0	0	0	0	0	0	0	0		NONE	NONE
01-15-41-49	20 mg oral tablet, 10 mg, 0.5 tab(s), Oral, Daily	10	23	female	60	1.62	22.8624	NO	NKA	NO			NO			rivaroxiban	None	IDA,IBS,BILATERAL VEINUS THROMBOSIS, SLE	21	18	35.64	50	5.7	45	190.667	NONE	NONE	NONE	NONE	NONE	0	0	0	0	0	1	0	0	0	1	1		NONE	NONE
01-15-41-49	rivaroxaban 10 mg / 1 tab(s) Oral Daily	10	23	F	57	1.51	24.9989	NO	NKA	NO	NONE	NONE	None	None	None	Rivaroxaban	None	SLE, LUPUS NEPHRITIS & PROTEIN UREA	24	18	42	35.62	5.55	44	185.25	None	None	None	None	None	0	0	0	0	0	1	0	0	1	1	1		NONE	NONE
00-42-09-51	rivaroxaban 10 mg/ 1 tab(s) Oral Daily	10	23	M	68	1.77	21.7051	NO	TRAMADOL	NO	NONE	NONE	NONE	NONE	NONE	RIVA	NO	EPILEPSY, ACL RECONSTRUCTION	39	19	76	36.57	5.28	73	133.205	NONE	NONE	NONE	NONE	NONE	0	0	0	0	0	0	0	0	0	0	0		NONE	NONE
01-13-78-98	15 mg daily	15	23	female	90	1.59	35.5999	no	NKA	yes	2018	Left leg DVT + Bilateral PE	no			rivaroxaban	None		76	35	136	29.6	5.47	43	299.302	NONE	NONE	NONE	NONE	NONE	0	0	0	0	0	1	0	0	0	0	1		NONE	NONE
00-45-82-28	rivaroxaban 15 mg / 1 tab(s) Oral Daily	15	23	M	53	1.7	18.3391	NO	NKA	Yes	2019	SUPERFICIAL VT	NONE	NONE	NONE	RIVA	NO	PROVOKED SUPERFICIAL VEIN THROMBOSIS BILATERALLY DUE TO MULTIPLE NEEDLE PRICKING IN LAST ADMISSION, PSYCHOGENIC SEIZURE	20	16	72	43.94	10.16	77	98.4286	NONE	NONE	NONE	NONE	NONE	0	0	0	0	0	0	0	0	0	0	0		NONE	NONE
10-08-81-77	20 mg daily	20	23	male	65	1.7	22.4913	NO	NKA	yes	43709	Provoked Left external iliac vein thrombosis	no			rivaroxaban	None	Rt hemopnemothorax with s/p ICT, liver laceration, VTE	15	14	69	40.9	8.56	68	136.691	NONE	NONE	NONE	NONE	NONE	0	0	0	0	0	0	0	0	0	1	1		NONE	NONE
01-04-68-27	20 mg daily	20	23	female	70	1.47	32.3939	NO	NKA	no			no			rivaroxaban	None	DiGeorge syndrome, Ulcerative colitis, Recurrent UTI, ASD closure + Mitral valve repair on 6/10/2019	14	10	56	30.92	4.82	64	156.406	NONE	NONE	NONE	NONE	NONE	0	0	0	0	0	0	0	0	0	0	0		NONE	NONE
10-20-69-29	20 mg daily	20	23	male	138.3	1.78	43.6498	NO	NKA	yes		Budd Chairi syndrome	no			rivaroxaban	None	Budd Chairi syndrome	74	48	174	43.35	29.17	64	309.014	NONE	NONE	NONE	NONE	NONE	0	0	0	0	0	0	0	0	0	0	0		NONE	NONE
01-19-03-54	20 mg oral qpm	20	23	female	79.9	1.64	29.707	NO	penicilin	yes		DVT	no			rivaroxiban	None	SLE , DVT	22	18	98	40.02	2.91	63	181.36	NONE	NONE	NONE	NONE	NONE	0	0	0	0	0	0	0	0	0	1	0		NONE	NONE
00-81-36-63	rivaroxaban 20 mg/ 1 tab(s) Oral Daily	20	23	M	49.7	1.695	17.2988	NO	NKA	NO	NONE	NONE	NONE	NONE	NONE	RIVA	NO	INFERIOR MESENTRIC VEIN THROMBOSIS	35	14	99	34	12	85	83.6129	NONE	NONE	NONE	NONE	NONE	0	0	0	0	0	0	0	0	0	0	0		NONE	NONE
00-39-87-67	rivaroxaban 10 mg/ 1 tab(s) Oral Daily	10	24	F	50.1	1.585	19.9425	NO	EGGPLANT	NO	NONE	NONE	NONE	NONE	NONE	RIVA	NO	SCOLIOSIS (SPINAL LESION), BILATERAL FEET DEFORMITY, SHE UNDERWENT CALCANEAL OSTEOTOMY WITH TIBIAL POSTERIOR TRANSFER	35	14	99	34	12	85	83.5655	NONE	NONE	NONE	NONE	NONE	0	0	0	0	0	0	0	0	0	0	0		NONE	NONE
00-40-95-23	rivaroxaban 10 mg/ 1 tab(s) Oral Daily	10	24	F	66	1.65	24.2424	NO	WATERMELON	NO	NONE	NONE	NONE	NONE	NONE	RIVA	NO	HALLUX VALGUS CORRECTION 2017	20	13	56	36.26	5.64	54	173.284	NONE	NONE	NONE	NONE	NONE	0	0	0	0	0	0	0	0	0	0	0		NONE	NONE
10-18-44-95	15 mg daily	15	24	male	75	1.54	31.6242	NO	NKA	yes		extensive venous sinus thrombosis	no			rivaroxaban	None	extensive venous sinus thrombosis	13	0	0	36.9	4.31	51	208.497	NONE	NONE	NONE	NONE	NONE	0	0	0	0	0	0	0	0	0	0	0		NONE	NONE
01-08-86-75	20 mg daily	20	24	female	64	1.7	22.1453	NO	NKA	yes		PE	no			rivaroxaban	None	PE, IDA	24	18	69	36.5	9.07	50	181.476	NONE	NONE	NONE	NONE	NONE	0	0	0	0	0	1	0	0	0	0	1		NONE	NONE
10-05-74-96	20 mg daily	20	24	male	78.3	1.785	24.5745	NO	NKA	no			no			rivaroxaban	None	LT. FOOT DEFORMITY	36	16	139	40.29	5.92	53	209.457	NONE	NONE	NONE	NONE	NONE	0	0	0	0	0	0	0	0	0	0	1		NONE	NONE
10-00-78-42	20 mg daily	20	24	female	69	1.66	25.0399	NO	NKA	yes		NON -OCCLUSIVE SUPERIOR MESENTERIC VEIN THROMBOSIS	no			rivaroxaban	None	total colectomy with pouch, UC	19	15	47	34.73	4.69	59	165.808	NONE	NONE	NONE	NONE	NONE	0	0	0	0	0	1	0	0	0	0	0		NONE	NONE
10-00-20-41	20 mg daily	20	24	male	104.2	1.69	36.4833	NO	NKA	no			no			rivaroxaban	None	swelling in submandibular area, soft tender swelling	211	92	109	32.57	30.79	58	254.711	NONE	NONE	NONE	NONE	NONE	0	0	0	0	0	0	0	0	0	0	0		NONE	NONE
10-18-55-21	20 mg daily	20	24	female	74	1.55	30.8012	NO	NKA	yes		DVT	no			rivaroxaban	None	DVT	95	43	125	40.29	2.9	40	262.289	NONE	NONE	NONE	NONE	NONE	0	0	0	0	0	0	0	0	0	0	0		NONE	NONE
10-15-16-30	15 mg BID for 18 days then 20 mg oral daily	30	24	male	100	1.7	34.6021	NO	NKA	yes		DVT,PE	no			rivaroxiban	None	DVT,PE,ASTHMA	87	17	67	32.53	7.49	75	189.037	NONE	NONE	NONE	NONE	NONE	0	0	0	0	0	0	0	0	0	0	0		NONE	NONE
01-05-06-84	10 mg daily	10	25	female	40	1.5	17.7778	NO	NKA	no			no			rivaroxaban	None	Right genu varus deformity, OCD in the medial femoral condyle	28	63	70	31.44	8.45	30	187.407	NONE	NONE	NONE	NONE	NONE	0	0	0	0	0	0	0	0	0	0	1		NONE	NONE
10-24-17-45	10 mg daily	10	25	female	65	1.52	28.1337	NO	NKA	yes		line related right cephalic vein thrombosis of the upper limb.	no			rivaroxaban	None	osteosarcoma, Fractured left femur	27	11	65	38.96	8.95	66	138.426	NONE	NONE	NONE	NONE	NONE	0	0	0	0	0	1	0	0	0	0	0		NONE	NONE
10-01-08-68	10 mg daily	10	25	female	82	1.7	28.3737	NO	NKA	yes		DVTs	no			rivaroxaban	None	DVT, fu irregular cycles, with undiagnosed thrombophilia	28	17	99	35.6	8.02	68	169.493	NONE	6.48	NONE	NONE	NONE	0	0	0	0	0	1	0	0	0	0	0		NONE	NONE
10-05-87-81	10 mg daily	10	25	female	46	1.57	18.662	NO	NKA	no			no			rivaroxaban	None	right flat foot reconstruction	17	17	73	45	10.67	70	92.3651	NONE	NONE	NONE	NONE	NONE	0	0	0	0	0	0	0	0	0	0	0		NONE	NONE
01-13-47-08	10 mg daily	10	25	male	99	1.77	31.6001	no	NKA	no			no			rivaroxaban	None		53	22	90	40.36	11.55	83	167.651	NONE	NONE	NONE	NONE	NONE	0	0	0	0	0	0	0	0	0	0	0		NONE	NONE
10-12-59-99	10 mg oral qpm	10	25	male	70	1.73	23.3887	NO	NKA	no			no			rivaroxiban	None	ankle pain	25	21	96	41.06	20.78	45	218.642	NONE	NONE	NONE	NONE	NONE	0	0	0	0	0	0	0	0	0	0	0		NONE	NONE
10-24-17-45	rivaroxaban 10 mg / 1 tab(s) Oral Daily	10	25	F	75.2	1.58	30.1234	NO	NKA	NO	NONE	NONE	None	None	None	Rivaroxaban	None	LEFT FEMURSARCOMA	231	328	171	29.87	4.42	47	224.889	None	None	None	None	None	0	0	0	0	0	1	1	1	0	1	1		NONE	NONE
00-34-19-10	rivaroxaban 10 mg/ 1 tab(s) Oral Daily	10	25	M	112	1.69	39.2143	NO	NKA	NO	NONE	NONE	NONE	NONE	NONE	RIVA	NO	KNEE ANTHROSCOPY, HX OF RECONSTRUCTION OF ANTERIOR CRUCIATE, OBESITY, LIGAMENT TEAR, BRIATRIC SURGERY	175	65	87	38.78	11.36	90	174.914	NONE	NONE	NONE	NONE	NONE	0	0	0	0	0	0	0	0	0	0	0		NONE	NONE
00-35-18-27	rivaroxaban 10 mg/ 1 tab(s) Oral Daily	10	25	M	62	1.61	23.9188	NO	DUST	NO	NONE	NONE	NONE	NONE	NONE	RIVA	NO	BA, MODIFIED BROSTROM RIGHT KNEE	40	21	62	42.13	12	76	114.664	NONE	NONE	NONE	NONE	NONE	0	0	0	0	0	0	0	0	0	0	0		NONE	NONE
00-54-35-46	rivaroxaban 10 mg/ 1 tab(s) Oral Daily	10	25	M	45	1.61	17.3604	NO	NKA	Yes	?	PE	NONE	NONE	NONE	RIVA	NO	SCD, BILATERAL SUB SEGMENTAL ACUTE PE	19	37	78	42.46	115.86	57	110.965	NONE	NONE	NONE	NONE	NONE	0	0	0	0	0	0	0	0	0	0	0		NONE	NONE
01-00-24-14	20 mg daily	20	25	female	23	1.56	9.45102	NO	NKA	yes			no			rivaroxaban	None		30	22	111	32.1	4.56	31	104.283	NONE	NONE	NONE	NONE	NONE	0	0	0	0	0	1	1	0	0	1	1		NONE	NONE
00-95-08-59	20 mg daily	20	25	female	59	1.53	25.204	NO	NKA	yes		LEFT ILIOFEMORAL DVT, POST PARTUM	no			rivaroxaban	aspirin, 81 mg, Oral, Daily	DVT	19	10	59	40	6.88	58	142.979	NONE	NONE	NONE	NONE	NONE	0	0	0	0	0	1	1	0	0	0	1		NONE	NONE
10-08-75-45	20 mg daily	20	25	female	98	1.7	33.91	NO	NKA	yes	21/9/2018	Provoked PE	no			rivaroxaban	None	hypothyrodism, Benign breast masses, Fibroadenoma, PE	19	15	127	35.14	7.11	66	208.704	NONE	NONE	NONE	NONE	NONE	0	0	0	0	0	0	0	0	0	0	1		NONE	NONE
10-08-39-47	20 mg daily	20	25	female	178	1.685	62.6932	NO	NKA	yes	2016	PE with RA thrombus	no			rivaroxaban	None	Left atrial myxoma, PE, siezure	20	17	138	29.97	5.65	66	379.074	NONE	NONE	NONE	NONE	NONE	0	0	0	0	0	1	0	0	0	1	0		NONE	NONE
10-00-95-65	20 mg daily	20	25	female	67	1.68	23.7387	NO	NKA	yes	42156	Idiopathic DVT of Right LL	no			rivaroxaban	None	DVT	13	11	94	43	5.88	61	154.381	NONE	0.38	NONE	NONE	NONE	0	0	0	0	0	0	0	0	0	0	0		NONE	NONE
01-19-82-45	20 mg daily	20	25	male	50.6	1.745	16.6173	NO	NKA	yes		DVT	no			rivaroxaban	None	DVT	31	20	56	40	11.1	88	80.8194	NONE	NONE	NONE	NONE	NONE	0	0	0	0	0	0	0	0	0	0	0		NONE	NONE
10-12-22-48	20 mg oral tablet, 1 tab(s), Oral, qPM	20	25	female	56	1.5	24.8889	NO	NKA	no			no			rivaroxiban	None	biliary pancreatitis	63	36	200	34.57	8.08	33	238.519	NONE	NONE	NONE	NONE	NONE	0	0	0	0	0	1	0	0	0	0	0		NONE	NONE
10-13-44-12	20 mg oral tablet, 1 tab(s), Oral, qPM	20	25	female	106	1.63	39.8961	NO	NKA	yes		PE	no			rivaroxiban	None	POST SLEEV SURGERY . PE, anxiaty	21	10	80	40.02	3.25	56	266.052	NONE	NONE	NONE	NONE	NONE	0	0	0	0	0	1	0	0	0	0	0		NONE	NONE
00-68-70-97	rivaroxaban 20 mg/ 1 tab(s) Oral Daily	20	25	F	72.3	1.57	29.3318	NO	NKA	NO	NONE	NONE	NONE	NONE	NONE	RIVA	NO	CVT, DVT	13	18	87	34.73	4.89	44	230.958	NONE	NONE	NONE	NONE	NONE	0	0	0	0	0	0	0	0	0	0	0		NONE	NONE
00-34-44-15	rivaroxaban 20 mg/ 1 tab(s) Oral Daily	20	25	F	114	1.69	39.9146	NO	NKA	Yes	2015	DVT, PE	NONE	NONE	NONE	RIVA	NO	IDA SECONDARY TO SLEEVE GASTERECTOMY, PROVOKED DVT COMPLICATED TO PE AND CRRENTLY NOT ON ANTICOAGULANT, GERD,	20	21	82	41.6	6.85	56	286.131	NONE	NONE	NONE	NONE	NONE	0	0	0	0	0	0	0	0	0	0	0		NONE	NONE
01-06-55-87	10 mg daily	10	26	male	69.9	1.6	27.3047	NO	NKA	no			no			rivaroxaban	None	POST REMOVAL OF SCREWS AND TA LENGTHENING RIGHT	51	25	101	42.71	6.78	65	149.837	NONE	NONE	NONE	NONE	NONE	0	0	0	0	0	0	1	1	0	0	1		NONE	NONE
10-20-07-81	10 mg daily	10	26	female	76.6	1.63	28.8306	NO	NKA	yes		Pregnancy provoked DVT	no			rivaroxaban	Aspirin 81mg	DVT	16	11	77	29.08	5.32	32	333.529	NONE	NONE	NONE	NONE	NONE	0	0	0	0	0	0	0	0	0	0	0		NONE	NONE
10-22-23-40	10 mg daily	10	26	male	65.3	1.76	21.0808	NO	NKA	no			no			rivaroxaban	None	Membranous Nephropathy, Nephrotic Syndrome.	28	15	52	12.82	1.65	41	221.914	NONE	NONE	NONE	NONE	NONE	0	0	0	0	0	0	0	0	0	0	0		NONE	NONE
01-14-12-00	10 mg daily	10	26	female	64.2	1.6	25.0781	no	NKA	no			None			rivaroxaban	None		35	14	99	34	12	85	105.238	NONE	NONE	NONE	NONE	NONE	0	0	0	0	0	0	0	0	0	0	0		NONE	NONE
02-56-44-91	15 mg daily	15	26	male	65	1.76	20.984	NO	NKA	no			no			rivaroxaban	None	UC, iron deficiency anemia	35	14	99	34	12	85	106.549	NONE	NONE	NONE	NONE	NONE	0	0	0	0	0	0	0	0	0	0	0		NONE	NONE
10-05-94-09	20 mg daily	20	26	female	62	1.79	19.3502	NO	NKA	yes		BRACHIAL VEIN THROMBOSIS POST RTA	no			rivaroxaban	None	right renal contusion, liver contusion, right 12th rib fracture	30	29	107	33	5.68	74	116.739	NONE	NONE	NONE	NONE	NONE	0	0	0	0	0	0	0	0	0	1	0		NONE	NONE
10-17-40-29	20 mg daily	20	26	female	65.4	1.47	30.2652	NO	BUSCOPAN, diclofenac	yes		PE, DVT	NO			rivaroxaban	None	IDA, PE, DVT	123	49	211	35.62	8.74	62	146.974	NONE	0.52	NONE	NONE	NONE	0	0	0	0	0	0	0	0	0	0	0		NONE	NONE
10-14-42-98	20 mg oral daily	20	26	male	80	1.6	31.25	NO	NKA	no			no			rivatoxaban	None		35	14	99	34	12	85	131.137	NONE	NONE	NONE	NONE	NONE	0	0	0	0	0	1	0	0	0	0	0		NONE	NONE
01-17-75-82	20 mg oral qpm	20	26	male	95	1.63	35.756	NO	NKA	yes		DVT	no			rivaroxiban	None		39	29	124	24.65	9.51	71	186.432	NONE	NONE	NONE	NONE	NONE	0	0	0	0	0	1	0	0	0	0	0		NONE	NONE
10-11-52-74	20 mg oral tablet, 1 tab(s), Oral, qPM	20	26	female	70	1.55	29.1363	NO	NKA	yes		DVT	no			rivaroxiban	None	T2DM,DVT,	14	15	100	35.86	2.79	49	199.048	NONE	NONE	NONE	NONE	NONE	0	0	0	0	0	1	0	0	0	1	0		NONE	NONE
00-28-74-93	rivaroxaban 20 mg Oral Daily	20	26	F	79	1.61	30.4772	NO	NKA	NO	NONE	NONE	NONE	NONE	NONE	RIVA	NO	FLAT FOOT RECONSTRUCTION AND LAPIDUS PROCEDURE	20	12	54	36	9.17	72	152.88	NONE	NONE	NONE	NONE	NONE	0	0	0	0	0	0	0	0	0	0	0		NONE	NONE
00-76-98-92	rivaroxaban 20 mg/ 1 tab(s) Oral Daily	20	26	F	60.2	1.616	23.0523	NO	NKA	NO	NONE	NONE	NONE	NONE	NONE	RIVA	NO	PROVOKED ABDOMINAL VENOUS THROMBOSIS,	14	20	79	41.39	9.16	60	139.798	NONE	NONE	NONE	NONE	NONE	0	0	0	0	0	0	0	0	0	0	0		NONE	NONE
10-15-42-85	15 mg BID for 21 days then 20 mg oraly daily	30	26	male	78	1.7	26.9896	NO	NKA	yes		DVT	NO			rivaroxiban	None	DVT	19	14	99	36.8	12.08	69	157.507	NONE	NONE	NONE	NONE	NONE	0	0	0	0	0	0	0	0	0	0	0		NONE	NONE
00-98-55-37	10 mg daily	10	27	male	63	1.59	24.9199	NO	NKA	yes		mesenteric & Portal Vein thrombosis with intra- abdominal variceal bleeding	no			rivaroxaban	None	liver cirrhosis, HBV, Budd Chiari with with multiple TIPS, thalasemia triat, esophageal varices bleeding	28	42	102	33.26	90.13	57	152.649	None	NONE	NONE	NONE	NONE	0	0	0	1	0	1	1	0	0	1	1		NONE	NONE
00-99-58-06	10 mg daily	10	27	female	81.6	1.68	28.9116	NO	NKA	no			no			rivaroxaban	None	RIGHT HALLUX VALGUS	22	12	72	36.09	4.09	47	239.784	NONE	NONE	NONE	NONE	NONE	0	0	0	0	0	0	0	0	0	0	0		NONE	NONE
02-57-22-98	10 mg daily	10	27	female	44.8	1.58	17.9458	NO	NKA	no			no			rivaroxaban	None	DLD, proximal phalanx fracture	22	11	56	36.8	4.76	42	147.319	NONE	NONE	NONE	NONE	NONE	0	0	0	0	0	0	0	0	0	0	0		NONE	NONE
01-11-70-10	10 mg daily	10	27	female	95	1.56	39.0368	NO	NKA	yes		DVT, PE	no			rivaroxaban	None	recurrent thrombosis, Thrombocytopenia	16	17	60	32.81	4.64	56	234.296	NONE	NONE	NONE	NONE	NONE	0	0	0	0	0	0	0	0	0	0	0		NONE	NONE
00-23-94-64	rivaroxaban 15 mg / 1 tab(s) Oral Daily	15	27	M	58	1.54	24.4561	NO	NKA	Yes	2019	RENAL VEIN THROM.	NONE	NONE	NONE	RIVA	NO	SICKLE CELL ANEMIA, RENAL VEIN THROMBOSIS,	22	22	107	36.68	27.22	55	145.644	NONE	NONE	NONE	NONE	NONE	0	0	0	0	0	0	0	0	0	0	0		NONE	NONE
00-96-41-17	20 mg daily	20	27	female	55.4	1.6	21.6406	NO	NKA	yes		PE	no			rivaroxaban	None	CD - Crohn's disease, diarrhea	27	18	170	32.8	3.47	42	182.175	NONE	NONE	NONE	NONE	NONE	0	0	0	0	0	1	1	0	0	1	1		NONE	NONE
01-06-25-26	20 mg daily	20	27	male	170	1.6	66.4062	NO	NKA	no			no			rivaroxaban	None	Quadriplegic, diaphragmatic pacemaker insertion, Tracheostomize	18	37	87	32.82	9.48	48	489.144	NONE	NONE	NONE	NONE	NONE	0	0	0	0	0	1	0	0	0	0	1		NONE	NONE
10-09-93-88	20 mg daily	20	27	female	74	1.68	26.2188	NO	NKA	yes	43040	DVT, PE	no			rivaroxaban	aspirin, 81 mg, Oral, Daily	DVT, PE, Anxiety	19	16	60	34.3	5.27	50	204.404	NONE	NONE	NONE	NONE	NONE	0	0	0	0	0	0	0	0	0	0	1		NONE	NONE
10-00-23-87	20 mg daily	20	27	female	43.6	1.56	17.9158	NO	NKA	yes		recurrent DVTs	no			rivaroxaban	aspirin, 81 mg, Oral, Daily	anexity, Anti-III deficiency, DVTs	17	9	52	29.74	4.53	33	182.474	NONE	NONE	NONE	NONE	NONE	0	0	0	0	0	0	0	0	0	0	0		NONE	NONE
01-03-24-84	20 mg daily	20	27	male	67.6	1.7	23.391	yes	NKA	no			no			rivaroxaban	None	stroke, Autoimmune hemolytic anemia, Acute right-sided cerebral infarction, thrombocytopenia,	35	14	109	48.17	10.95	70	133.376	NONE	NONE	NONE	NONE	NONE	0	0	0	0	0	0	0	0	0	0	0		NONE	NONE
01-04-01-33	20 mg daily	20	27	female	74	1.62	28.1969	NO	NKA	yes		provoked PE	no			rivaroxaban	None	asthma, CTEPH	22	13	149	39	5.3	57	179.302	NONE	NONE	NONE	NONE	NONE	0	0	0	0	0	0	0	0	0	0	0		NONE	NONE
01-19-51-44	20 mg daily	20	27	male	71	1.79	22.1591	NO	NKA	yes		PE	no			rivaroxaban	None	PE	64	28	168	37	8.55	91	107.757	NONE	NONE	NONE	NONE	NONE	0	0	0	0	0	0	0	0	0	0	0		NONE	NONE
10-22-51-62	20 mg daily	20	27	male	79	1.73	26.3958	NO	NKA	yes		Provoked Segmental PE post car accident.	no			rivaroxaban	None	PE	66	74	124	30.88	6.38	71	153.673	NONE	NONE	NONE	NONE	NONE	0	0	0	0	0	0	0	0	0	0	0		NONE	NONE
00-86-50-88	20 mg daily for one month then discontinue	20	27	male	79.8	1.845	23.4428	yes	NKA	no			yes		Paroxysmal atrial fibrillation	rivaroxaban	ASA, 81 mg, Oral, Daily		35	14	99	34	12	80	137.766	NONE	NONE	NONE	NONE	NONE	0	0	0	0	0	0	0	0	0	0	0		NONE	NONE
01-06-25-26	rivaroxaban 20 mg/ 1 tab(s) Oral Daily	20	27	M	180	1.6	70.3125	NO	Fish	NO	NONE	NONE	None	None	None	Rivaroxaban	None	QUADRIPLEGIC , TRACHEOSTOMIZED	24	19	106	28.63	7.19	39	637.436	None	None	None	None	None	0	0	0	0	0	1	0	0	1	1	1		NONE	NONE
00-24-75-55	rivaroxaban 20 mg/ 1 tab(s) Oral Daily	20	27	M	69	1.7	23.8754	NO	NKA	Yes	?	DVT	NONE	NONE	NONE	RIVA	NO	ROSAI-DORFMAN DISEASE, RECURRENT DVT, PATIENT CURRENTLY ON ENOXAPARINE	33	23	108	40.12	5.85	132	72.1944	NONE	NONE	NONE	NONE	NONE	0	0	0	0	0	0	0	0	0	0	0		NONE	NONE
10-16-86-85	10 mg daily	10	28	male	65	1.66	23.5883	NO	NKA	no			no			rivaroxiban	None	THR, mild knee pain	47	42	41	29.79	5.73	72	123.58	NONE	NONE	NONE	NONE	NONE	0	0	0	0	0	0	0	0	0	0	0		NONE	NONE
10-23-20-93	10 mg daily	10	28	female	56	1.435	27.1947	NO	NKA	yes		acute DVT from left common femoral to popletial veins	no			rivaroxaban	None	NMO	20	16	73	37.44	3.62	36	212.938	NONE	NONE	NONE	NONE	NONE	0	0	0	0	0	0	0	0	0	0	0		NONE	NONE
10-12-73-99	10 mg oral daily	10	28	female	58	1.57	23.5304	NO	NKA	no			no			rivaroxiban	None	ANKLE DEBRIDEMENT AND OCD REMOVAL	16	12	90	38.69	5.77	45	176.435	NONE	NONE	NONE	NONE	NONE	0	0	0	0	0	1	1	0	0	0	1		NONE	NONE
00-85-31-13	10 mg oral daily for 21 dyas	10	28	female	89	1.71	30.4367	NO	NKA	no		post left lapidus procedure for hallux valgus	no			rivaroxaban	None	no	35	14	99	34	12	85	143.331	NONE	NONE	NONE	NONE	NONE	0	0	0	0	0	0	0	1	0	0	0		NONE	NONE
00-22-60-93	rivaroxaban 10 mg/ 1 tab(s) Oral Daily	10	28	F	57	1.5	25.3333	NO	NKA	NO	NONE	NONE	NONE	NONE	NONE	RIVA	ASA	LEFT HALLUX VALGUS, BA	35	14	99	34	12	85	91.7961	NONE	NONE	NONE	NONE	NONE	0	0	0	0	0	0	0	0	0	0	0		NONE	NONE
01-10-48-13	15 mg daily	15	28	male	83	1.84	24.5156	NO	NKA	yes		DVT	no			rivaroxaban	None	DVT	35	0	0	45.4	14.01	82	138.558	NONE	0.37	NONE	NONE	NONE	0	0	0	0	0	1	0	1	0	0	1		NONE	NONE
01-03-34-00	20 mg daily	20	28	male	100.6	1.7	34.8097	NO	NKA	yes		Cerebral Vein thrombosis	no			rivaroxaban	None	HTN, Membranous Nephropathy, Renal limited Lupus Nephritis, Morbid Obesity, Cerebral Vein thrombosis, SLE	18	12	131	39.69	7.15	96	143.448	NONE	NONE	NONE	NONE	NONE	0	0	0	0	0	1	0	0	0	0	1		NONE	NONE
10-10-79-20	20 mg daily	20	28	female	92	1.6	35.9375	NO	NKA	yes			no			rivaroxaban	aspirin, 81 mg, Oral, Daily	DVT, HELLP syndrome, eclamptic seizure	8	11	105	22.8	5.94	48	262.37	NONE	NONE	NONE	NONE	NONE	0	0	0	0	0	0	0	0	0	0	1		NONE	NONE
10-18-18-65	20 mg daily	20	28	male	160	1.7	55.3633	NO	coconut	no			no			rivaroxaban	None	vomiting, obesity	12	11	37	22.75	14.23	38	576.374	NONE	NONE	NONE	NONE	NONE	0	0	0	0	0	0	0	0	0	0	0		NONE	NONE
01-06-56-02	20 mg daily	20	28	male	60.7	1.68	21.5065	NO	NKA	yes		unprovoed DVT, PE	no			rivaroxaban	None	SLE, DVT, APS, HTN, ESRD, PE	17	16	87	32.97	15.43	904	9.19154	NONE	NONE	NONE	NONE	NONE	0	0	0	0	0	0	0	0	0	0	0		NONE	NONE
10-03-52-18	20 mg daily	20	28	male	90	1.84	26.5832	NO	NKA	yes		PE	no			rivaroxaban	None	PE, SPINAL INJURY	35	14	99	34	12	85	144.941	NONE	NONE	NONE	NONE	NONE	0	0	0	0	0	0	0	0	0	0	0		NONE	NONE
01-20-00-69	20 mg daily	20	28	male	50	1.6	19.5312	NO	NKA	no			yes			rivaroxaban	None	Afib, asthma	27	15	66	38.09	18.18	58	118.008	NONE	NONE	NONE	NONE	NONE	0	0	0	0	0	0	0	0	0	0	0		NONE	NONE
10-11-62-59	20 mg oral tablet, 1 tab(s), Oral, qPM	20	28	female	73.6	1.571	29.8212	NO	NKA	yes		mesenteric vein thrombosis	no			rivaroxiban	None	mesenteric vein thrombosis	20	12	88	39.21	5.99	39	258.334	NONE	NONE	NONE	NONE	NONE	0	0	0	0	0	1	0	0	0	0	0		NONE	NONE
00-39-13-48	rivaroxaban 20 mg/ 1 tab(s) Oral Daily	20	28	F	93	1.694	32.4083	NO	NKA	Yes	2016	DVT	NONE	NONE	NONE	RIVA	NO	PROVOKED DVT IN 2016	35	14	99	34	12	85	149.773	NONE	NONE	NONE	NONE	NONE	0	0	0	0	0	0	0	0	0	0	0		NONE	NONE
00-83-17-33	rivaroxaban 20 mg/ 1 tab(s) Oral Daily	20	28	F	52	1.53	22.2137	NO	NKA	Yes	2010	DVT,PE	NONE	NONE	NONE	RIVA	NO	SCA, VTE TWICE	15	33	118	31.42	32.81	23	309.488	NONE	NONE	NONE	NONE	NONE	0	0	0	0	0	0	0	0	0	0	0		NONE	NONE
10-11-80-91	10 mg orally qpm	10	29	female	75	1.6	29.2969	NO	NKA	no			no			rivaroxiban	None	partial hip replacment,lymphoma,	17	49	108	15.36	6.75	46	221.196	NONE	NONE	NONE	NONE	NONE	0	0	0	0	0	0	0	0	0	0	0		NONE	NONE
10-09-14-93	15 mg daily	15	29	male	62	1.71	21.2031	NO	NKA	no			no			rivaroxaban	None	stroke,	35	14	99	34	12	85	98.9569	NONE	NONE	NONE	NONE	NONE	0	0	0	0	0	1	1	1	0	0	0		NONE	NONE
10-17-45-43	15 mg daily	15	29	male	63	1.76	20.3383	NO	NKA	yes		PE	no			rivaroxaban	None	PE,	26	20	109	41.44	29.11	122	70.0574	NONE	NONE	NONE	NONE	NONE	0	0	0	0	0	0	0	0	0	0	0		NONE	NONE
00-87-13-84	15 mg oral tablet, 1 tab(s), Oral, qPM	15	29	male	35	1.24	22.7627	NO	NKA	yes	41000	LL DVT	no			rivaroxaban	None	bradycardia, cerebral palsy, DVT, hypotension	41	34	240	31.23	4.72	32	148.385	NONE	NONE	NONE	NONE	NONE	0	0	0	0	0	0	0	0	0	0	0		NONE	NONE
01-08-65-38	20 mg daily	20	29	female	80	1.62	30.4832	NO	NKA	yes		DVT	no			rivaroxaban	None	DVT, Right femoral fixation	19	0	0	37	5.44	47	230.922	NONE	0.68	NONE	NONE	NONE	0	0	0	0	0	0	0	0	0	0	1		NONE	NONE
10-11-30-80	20 mg daily	20	29	female	49	1.64	18.2183	NO	NKA	no			no			rivaroxaban	None	Budd-chiari	34	32	149	32.75	15.48	49	135.667	NONE	NONE	NONE	NONE	NONE	0	0	0	0	0	1	1	0	0	1	0		NONE	NONE
10-00-71-35	20 mg daily	20	29	male	50	1.64	18.5901	NO	NKA	no			yes		Paroxysmal AFib	rivaroxaban	aspirin, 81 mg, Oral, Daily	post Cryoablation of PV for A.fib, Idiopathic Dilated Cardiomyopathy, Severe LV Systolic DysfunctionParoxysmal AFib	35	34	55	39.27	9.83	134	50.6219	NONE	NONE	NONE	NONE	NONE	0	0	0	0	0	0	0	1	0	0	0		NONE	NONE
01-11-62-48	20 mg daily	20	29	female	76	1.6	29.6875	NO	NKA	yes	2015	unprovoked Bilateral DVT	no			rivaroxaban	None	Behcet disease	22	10	75	32.9	2.65	37	278.667	NONE	NONE	NONE	NONE	NONE	0	0	0	0	0	1	1	0	0	0	0		NONE	NONE
01-00-49-07	20 mg daily	20	29	male	68	1.66	24.677	NO	NKA	yes		PE after multiple syncopal attacks	yes	43678	previous AF with syncopal attacks	rivaroxaban	aspirin 81 mg daily	Epilepsy, Afib, PE	50	17	54	38.56	12.31	66	139.778	NONE	NONE	NONE	NONE	NONE	0	0	0	0	0	0	0	0	0	0	0		NONE	NONE
10-22-98-18	20 mg daily	20	29	female	85	1.65	31.2213	NO	NKA	yes	43806	DVT in left ilio-femoral	no			rivaroxaban	None	DVT	16	10	94	33.6	7.66	53	217.579	NONE	2.13	NONE	NONE	NONE	0	0	0	0	0	0	0	0	0	0	0		NONE	NONE
01-01-49-90	20 mg daily	20	29	male	89	1.725	29.9097	NO	NKA	yes		Superior vena cava thrombosis	no			rivaroxaban	None	Behcet disease	49	31	76	42.38	18.97	74	163.167	NONE	NONE	NONE	NONE	NONE	0	0	0	0	0	0	0	0	0	0	0		NONE	NONE
10-19-21-09	20 mg daily	20	29	male	61	1.66	22.1367	no	NKA	no			yes			rivaroxaban	None	RHD, AF, post MVR-bioprosthetic	22	20	52	38.71	8.38	51	162.268	NONE	NONE	NONE	NONE	NONE	0	0	0	0	0	0	0	0	0	0	0		NONE	NONE
00-34-43-55	rivaroxaban 20 mg/ 1 tab(s) Oral Daily	20	29	F	61	1.7	21.1073	NO	NKA	NO	NONE	NONE	NONE	NONE	NONE	RIVA	NO	LEFT FEMORAL DVT	26	14	99	35	6.05	80	103.446	NONE	NONE	NONE	NONE	NONE	0	0	0	0	0	0	0	0	0	0	0		NONE	NONE
00-78-03-51	rivaroxaban 20 mg/ 1 tab(s) Oral Daily	20	29	F	83.5	1.636	31.1975	NO	NKA	NO	NONE	NONE	NONE	NONE	NONE	RIVA	NO	POST ORIF,	35	14	99	34	12	85	133.273	NONE	NONE	NONE	NONE	NONE	0	0	0	0	0	0	0	0	0	0	0		NONE	NONE
00-25-47-29	rivaroxaban 20 mg/ 1 tab(s) Oral Daily	20	29	F	88.8	1.633	33.2997	NO	NKA	Yes	?	DVT	NONE	NONE	NONE	RIVA	NO	DVT SECONDARY TO THORACIC OUTLET SYNDROME	15	15	52	30.33	3.63	68	177.165	NONE	NONE	NONE	NONE	NONE	0	0	0	0	0	0	0	0	0	0	0		NONE	NONE
00-19-95-67	rivaroxaban 20 mg/ 1 tab(s) Oral Daily	20	29	M	112.3	1.71	38.405	NO	NKA	Yes	2007	DVT	NONE	NONE	NONE	RIVA	NO	PATIENT HAD DVT IN 2007 , STROKE ON 2013	49	20	79	36.99	8.2	80	190.442	NONE	NONE	NONE	NONE	NONE	0	0	0	0	0	0	0	0	0	0	0		NONE	NONE
00-22-15-20		20	29	F	37	1.52	16.0145	NO	NKA	Yes	2017	DVT	NONE	NONE	NONE	RIVA	NO	CEREBRAL PALSY AND SEIZURE DISORDER, ASPIRATION PNEUMONIA, DEVELOPED ACUTE LEFT BASALIC DVT 2RY TO IV CANULAPATIENT WAS DISCHARGED ON RIVA AND SHE STOPPED IT AFTER 4 MONTHS DURATION.	35	14	99	34	12	85	59.0549	NONE	NONE	NONE	NONE	NONE	0	0	0	0	0	0	0	0	0	0	0		NONE	NONE
02-47-72-52	10 mg daily	10	30	female	54	1.6	21.0937	NO	NKA	no			no			rivaroxaban	None	DLD, HTN, Polycystic kidney disease,	14	21	54	37.67	4.87	61	119.016	NONE	NONE	NONE	NONE	NONE	0	0	0	0	0	1	0	1	0	0	1		NONE	NONE
01-14-03-55	10 mg daily	10	30	female	83	1.5	36.8889	no	NKA	no			no			rivaroxaban	None	Crohn's disease, Exploratory sigmoidectomy	20	11	61	34.88	12.89	64	174.358	NONE	NONE	NONE	NONE	NONE	0	0	0	0	0	1	0	0	0	0	1		NONE	NONE
01-02-79-67	10 mg daily	10	30	female	45	1.57	18.2563	NO	NKA	yes		PVT	no			rivaroxaban	None	epilepsy, post spleenectomy	22	18	48	41	15.52	64	94.5312	NONE	NONE	NONE	NONE	NONE	0	0	0	0	0	0	1	0	0	0	0		NONE	NONE
01-20-27-96	10 mg daily	10	30	female	48	1.55	19.9792	NO	NKA	no			no			rivaroxaban	None	asthma, budd chiarri syndrome	17	25	85	40.33	21.98	47	137.305	NONE	0.27	NONE	NONE	NONE	0	0	0	0	0	0	0	0	0	0	0		NONE	NONE
10-01-22-99	15 mg daily	15	30	male	108.6	1.725	36.4965	NO	NKA	yes		DVT, PE	no			rivaroxaban	None	cardiomyopathy, EF 25%, PE, DVT	313	129	98	31	24.84	126	115.878	NONE	NONE	NONE	NONE	NONE	0	0	0	0	0	0	0	0	0	0	0		NONE	NONE
00-99-70-27	20 mg daily	20	30	male	50	1.535	21.2204	NO	NKA	yes		2 unprovoked lower limb DVTs and IVC thrombosis	no			rivaroxaban	None	Behcets disease, DVTs	32	26	109	38.85	4.77	75	89.6296	NONE	NONE	NONE	NONE	NONE	0	0	0	0	0	1	1	0	0	0	1		NONE	NONE
10-01-96-74	20 mg daily	20	30	male	105.5	1.815	32.0257	yes	NKA	no			no			rivaroxaban	aspirin, 81 mg, Oral, Daily	decompensated cardiomyopathy, LV dysfunction, pacemaker, CARDIAC DYSRHYTHMIAS	78	26	247	39.07	27.98	57	248.84	NONE	NONE	NONE	NONE	NONE	0	0	0	0	0	0	0	0	0	1	0		NONE	NONE
00-86-38-57	20 mg daily	20	30	female	83.4	1.54	35.1661	NO	NKA	yes	42801	Provoked Acute Right lower Limb DVT	no			rivaroxaban	None		28	14	101	35.99	7.43	60	186.878	NONE	3.96	NONE	NONE	NONE	0	0	0	0	0	0	0	0	0	0	0		NONE	NONE
10-21-87-84	20 mg daily	20	30	female	110	1.62	41.9143	NO	NKA	yes		splenic vein thrombosis	no			rivaroxaban	None	splenic vein thrombosis, abdominal pain	20	16	136	26.67	5.23	45	328.642	NONE	NONE	NONE	NONE	NONE	0	0	0	0	0	0	0	0	0	0	0		NONE	NONE
10-16-53-31	20 mg daily	20	30	female	54	1.58	21.6311	NO	NKA	yes	28/4/2018	provoked DVT	no			rivaroxiban	None	DVT, lupus	76	73	188	16.74	3.47	48	151.25	NONE	6.25	NONE	NONE	NONE	0	0	0	0	0	0	0	0	0	0	0		NONE	NONE
01-13-56-50	20 mg daily	20	30	male	105.3	1.82	31.7896	no	NKA	yes		portal veins thrombosis	no			rivaroxaban	None	DVT, obesity	23	10	64	39.15	14.92	61	232.082	NONE	NONE	NONE	NONE	NONE	0	0	0	0	0	0	0	0	0	0	0		NONE	NONE
00-90-30-41	20 mg oral daily	20	30	male	84	1.6	32.8125	NO	NKA	yes		provoked vs non-provoked extensive thrombosis for investigations	no			rivaroxaban	None		40	37	49	39.21	11.72	119	94.902	NONE	NONE	NONE	NONE	NONE	0	0	0	0	0	0	0	0	0	0	0		NONE	NONE
00-85-30-30	20 mg, Oral, qPM	20	30	female	57	1.65	20.9366	NO	NKA	yes		thrombosed venous malformation at her Lt groin	no			rivaroxaban	aspirin, 81 mg, Oral, Daily,clopidogrel, 75 mg, Oral, Daily		35	14	99	34	12	85	90.1569	NONE	NONE	NONE	NONE	NONE	0	0	0	0	0	1	0	0	0	0	0		NONE	NONE
00-43-54-37	rivaroxaban 20 mg/ 1 tab(s) Oral Daily	20	30	M	81	1.71	27.7008	NO	EGGPLANT, SHRIMP	NO	NONE	NONE	NONE	NONE	NONE	RIVA	NO	IDIOPAHIC SPLENIC INFARCTION, PROTEIN C & S DEFEICIENCY, CEREBRAL VENOUS SINUS THROMBOSIS	66	35	80	40.35	8.78	89	122.36	NONE	NONE	NONE	NONE	NONE	0	0	0	0	0	0	0	0	0	0	0		NONE	NONE
01-04-13-84	10 mg daily	10	31	female	66.2	1.54	27.9136	NO	NKA	yes		DVT	no			rivaroxaban	None	SVD, induced vaginal delivery, DVT	9	23	209	24.9	23.45	34	259.392	NONE	NONE	NONE	NONE	NONE	0	0	0	0	0	1	1	0	0	0	1		NONE	NONE
01-07-01-19	10 mg daily	10	31	male	76	1.8	23.4568	NO	NKA	no			no			rivaroxaban	ASA, 81 mg, Oral, Daily	Thrombophillia, RTA	86	30	86	40.7	4.11	82	123.474	NONE	NONE	NONE	NONE	NONE	0	0	0	0	0	0	0	0	1	0	0		NONE	NONE
00-92-82-86	10 mg daily	10	31	female	82.8	1.586	32.9173	NO	NKA	no			no			rivaroxaban	None	Pain in right arm, DLD	22	18	67	34.14	9.9	32	344.712	NONE	NONE	NONE	NONE	NONE	0	0	0	0	0	1	0	0	0	0	0		NONE	NONE
00-40-79-88	rivaroxaban 10 mg/ 1 tab(s) Oral Daily	10	31	F	90	1.5	40	NO	NKA	NO	NONE	NONE	NONE	NONE	NONE	RIVA	NO	DOWN SYNDROME, ASD, VSD, EISWNGMENGER SYNDROME, PULMO.HTN, OBSTRUCTIVE SLEEP APNEA ON CPAP, SECONDARY POLYCYTHEMIA ON WARFARIN THEN SHIFTED TO RIVA	25	21	83	29.69	26	47	255.106	NONE	NONE	NONE	NONE	NONE	0	0	0	0	0	1	0	0	0	0	0		NONE	NONE
00-15-36-84	rivaroxaban 10 mg/ 1 tab(s) Oral Daily	10	31	F	53	1.612	20.396	NO	NKA	NO	NONE	NONE	NONE	NONE	NONE	RIVA	NO	LEFT ANKLE REMOVAL OF IMPLANTS USING RIV FOR ALMOST THREE WEEKS	35	14	99	34	12	85	83.068	NONE	NONE	NONE	NONE	NONE	0	0	0	0	0	0	0	0	0	0	0		NONE	NONE
10-11-23-45	15 mg daily	15	31	male	80	1.6	31.25	NO	NKA	no			no			rivaroxaban	None	LEG PAIN SWELLING, HAD RTA	47	0	0	29.9	3.24	78	136.638	NONE	NONE	NONE	NONE	NONE	0	0	0	0	0	0	0	0	0	1	0		NONE	NONE
00-84-09-79	rivaroxaban 15 mg/ 1 tab(s) Oral Daily	15	31	F	64	1.48	29.2184	NO	NKA	Yes	?	DVT	NONE	NONE	NONE	RIVA	NO	DVT, ANEXIETY	23	14	99	33.3	8.49	61	139.774	NONE	NONE	NONE	NONE	NONE	0	0	0	0	0	0	0	0	0	0	0		NONE	NONE
10-07-75-44	20 mg daily	20	31	female	62	1.6	24.2187	NO	NKA	yes		PE	no			rivaroxaban	None	PE	31	16	85	39.68	3.73	56	147.496	NONE	0.27	NONE	NONE	NONE	0	0	0	0	0	1	0	0	0	1	1		NONE	NONE
01-03-03-61	20 mg daily	20	31	female	68.8	1.57	27.9119	NO	NKA	yes		DVT POSTPARTUM	no			rivaroxaban	None		20	12	64	36.26	6.5	54	169.735	NONE	NONE	NONE	NONE	NONE	0	0	0	0	0	1	0	0	0	0	1		NONE	NONE
01-15-06-48	20 mg daily	20	31	female	74	1.59	29.271	NO	NKA	yes		DVT, PE	NO			rivaroxiban	None		28	16	68	34.94	3.3	60	164.307	NONE	NONE	NONE	NONE	NONE	0	0	0	0	0	0	0	0	0	0	1		NONE	NONE
10-03-55-68	20 mg daily	20	31	male	70	1.74	23.1206	NO	NKA	no			yes			rivaroxaban	None	HF, ALCOHOL/DRUG INDUCED CARDIOMYOPATHY, Afib	35	14	99	34	12	85	109.712	NONE	NONE	NONE	NONE	NONE	0	0	0	0	0	0	0	0	0	1	0		NONE	NONE
01-06-37-17	20 mg daily	20	31	female	111	1.64	41.2701	NO	NKA	no			no			rivaroxaban	aspirin, 81 mg, Oral, Daily	ASD,ASD with PFO	21	11	97	36.34	8.33	59	250.638	NONE	NONE	NONE	NONE	NONE	0	0	0	0	0	0	0	0	0	0	0		NONE	NONE
01-11-62-17	20 mg daily	20	31	female	65	1.4	33.1633	NO	NKA	no			no			rivaroxaban	None	congenital heart disease, pulmonary branch stenosis	30	23	68	38	3.46	62	139.668	NONE	NONE	NONE	NONE	NONE	0	0	0	0	0	0	0	0	0	0	0		NONE	NONE
10-03-34-85	20 mg daily	20	31	female	60.9	1.63	22.9214	NO	Septra	yes		LOWER LIMB DVT	no			rivaroxaban	None	asthma, KNEE MEINSCAL REPAIR, DVT	18	21	51	37.47	4.61	64	126.769	NONE	NONE	NONE	NONE	NONE	0	0	0	0	0	0	0	0	0	0	0		NONE	NONE
10-17-06-76	20 mg daily	20	31	female	74	1.64	27.5134	NO	NKA	yes		PE	no			rivaroxiban	None	seizure, Clival chordoma, PE	25	31	45	37.61	53.03	60	164.307	NONE	1.16	NONE	NONE	NONE	0	0	0	0	0	0	0	0	0	0	0		NONE	NONE
01-08-80-39	20 mg daily	20	31	male	109	1.74	36.0021	NO	NKA	yes		LT unprovoked DVT	no			rivaroxaban	None	DVT	73	28	156	39.05	5.36	73	198.921	NONE	NONE	NONE	NONE	NONE	0	0	0	0	0	0	0	0	0	0	0		NONE	NONE
10-15-90-48	20 mg oral daily	20	31	female	106	1.71	36.2505	NO	NKA	yes		DVT	NO			rivaroxiban	None	DVT,Vitiligo	44	40	74	34.36	19.18	60	235.359	NONE	NONE	NONE	NONE	NONE	0	0	0	0	0	0	0	0	0	0	0		NONE	NONE
00-69-96-97	rivaroxaban 20 mg/ 1 tab(s) Oral Daily	20	31	F	88	1.6	34.375	NO	NKA	NO	NONE	NONE	NONE	NONE	NONE	RIVA	ASA	SLE, HTN, POST PARTUM SINUS VENOUS THROMBOSIS,	31	27	51	39.65	10.44	45	260.523	NONE	NONE	NONE	NONE	NONE	0	0	0	0	0	1	0	0	0	0	0		NONE	NONE
00-14-90-16	rivaroxaban 20 mg/ 1 tab(s) Oral Daily	20	31	F	114.2	1.686	40.1745	NO	MANGO	NO	NONE	NONE	NONE	NONE	NONE	RIVA	None	HTN, SLE, LUPUS NEPHRITIS, CAVERNOUS SINUS THROMBOSIS, STROKE, POLYYSTIC OVARIAN, HTN,	35	14	99	34	12	85	178.988	NONE	NONE	NONE	NONE	NONE	0	0	0	0	0	1	0	0	0	0	0		NONE	NONE
00-32-07-17	rivaroxaban 20 mg/ 1 tab(s) Oral Daily	20	31	F	77.3	1.56	31.7636	NO	NKA	Yes	2013	DVT	NONE	NONE	NONE	RIVA	NO	SLEEVE GASTERECTOMY 2019, IDA IRON DEF, ANEMIA	35	14	99	34	12	85	121.154	NONE	NONE	NONE	NONE	NONE	0	0	0	0	0	0	0	0	0	0	0		NONE	NONE
01-07-64-13	10 mg daily	10	32	female	63.4	1.59	25.0781	NO	NKA	no			no			rivaroxaban	None	residual defromity of surgically treated rt clubfoot rt foot reconstruction	18	16	85	35	14.01	51	164.094	NONE	NONE	NONE	NONE	NONE	0	0	0	0	0	1	0	0	0	0	1		NONE	NONE
10-04-01-57	10 mg daily	10	32	female	67	1.56	27.5312	NO	NKA	yes	2016, 2018	Recurrent portal vein thrombosis	no			rivaroxaban	aspirin, 81 mg, Oral, Daily	Recurrent portal vein thrombosis, Chronic PVT, Primary Myelofibrosis	35	14	99	34	12	85	104.047	NONE	NONE	NONE	NONE	NONE	0	0	0	0	0	0	0	0	0	1	0		NONE	NONE
01-13-53-16	10 mg daily	10	32	male	52	1.68	18.424	no	NKA	yes	2018	Left LL DVT	no			rivaroxaban	None	DVT, Behcet's disease	36	30	75	38.5	7.82	71	96.6761	NONE	NONE	NONE	NONE	NONE	0	0	0	0	0	1	0	0	0	0	0		NONE	NONE
10-06-26-47	10 mg daily	10	32	female	74	1.74	24.4418	NO	NKA	yes	42430	Portal vein and superior mesenteric vein thrombosis	no			rivaroxaban	None	Sickle cell trait + a-thalassemia trait, splenomegly, DVT	15	25	70	31.57	13.19	40	244.2	NONE	NONE	NONE	NONE	NONE	0	0	0	0	0	0	0	0	0	0	0		NONE	NONE
01-00-83-61	10 mg for 35 days	10	32	female	122.6	1.566	49.9927	NO	NKA	no			no			rivaroxaban	None	DM, obesity, relapsed proteiuria, DLP	23	19	78	12.22	3.6	51	317.318	NONE	NONE	NONE	NONE	NONE	0	0	0	0	0	1	0	0	0	0	1		NONE	NONE
00-17-76-57	rivaroxaban 10 mg/ 1 tab(s) Oral Daily	10	32	F	72	1.69	25.2092	NO	NKA	Yes	2017	BILATERAL PE	NONE	NONE	NONE	RIVA	NO	BILATERAL PE IN 2017, STROKE 2017 SECONDARY TO HYPERCOAGULABLE STATE (POSTPARTUM PERIOD) AND PFO, FOCAL SEIZURE IN 2018	23	12	61	37.13	4.34	46	206.609	NONE	NONE	NONE	NONE	NONE	0	0	0	0	0	0	0	0	0	0	0		NONE	NONE
10-10-55-18	take 10 mg for 5 days as DVT prophylaxis on day of travelling	10	32	female	82.1	1.553	34.0408	NO	NKA	yes		DVT	no			rivaroxaban	None	DVT	16	13	46	28.68	5.11	51	212.494	NONE	NONE	NONE	NONE	NONE	0	0	0	0	0	1	0	0	0	0	1		NONE	NONE
10-07-88-59	15 mg daily	15	32	female	71	1.6	27.7344	NO	NKA	yes		bilateral PE	no			rivaroxaban	None	hypothyrodism, PE	20	17	43	37	3.56	47	199.404	NONE	0.27	NONE	NONE	NONE	0	0	0	0	0	0	0	0	0	1	1		NONE	NONE
01-18-45-79	15 mg daily qpm	15	32	male	86	1.81	26.2507	NO	NKA	no			no			rivaroxiban	None		47	16	80	42.24	6.25	73	155.507	NONE	NONE	NONE	NONE	NONE	0	0	0	0	0	0	0	0	0	0	0		NONE	NONE
00-43-46-37	rivaroxaban 15 mg / 1 tab(s) Oral BID FOR 21 DAYS	15	32	F	80	1.6	31.25	NO	NKA	NO	NONE	NONE	NONE	NONE	NONE	RIVA	NO	SEVERE CHILDHOOD AUTOSOMAL RECESSIVE MUSCULAR DYSTROPHY, LEFT UPPER LIMB DVT	35	14	99	34	12	85	124.235	NONE	NONE	NONE	NONE	NONE	0	0	0	0	0	0	0	0	0	0	0		NONE	NONE
00-12-61-39	rivaroxaban 15 mg / 1 tab(s) Oral Daily	15	32	M	66	1.85	19.2841	NO	NKA	NO	NONE	NONE	NONE	NONE	NONE	RIVA	ASA	COMPLEX CYANOTIC CHD,	21	18	105	40.86	16.12	55	158.4	NONE	NONE	NONE	NONE	NONE	0	0	0	0	0	0	0	0	0	0	0		NONE	NONE
00-84-93-25	20 mg daily	20	32	male	68	1.75	22.2041	NO	NKA	yes	42300	Anterio lateral MI	no			rivaroxaban	aspirin, 81 mg, Oral, Daily, 6 refills, Plavix, 75 mg, Oral, Daily		35	14	99	34	13.44	85	105.6	NONE	NONE	NONE	NONE	NONE	0	0	0	0	0	1	0	1	1	0	1		NONE	NONE
01-07-72-50	20 mg daily	20	32	female	81	1.54	34.1542	NO	NKA	yes		cranial vein thrombosis	no			rivaroxaban	None	seizure, Eclampsia	18	11	88	36.8	5.85	81	132	NONE	NONE	NONE	NONE	NONE	0	0	0	0	0	1	1	0	0	0	1		NONE	NONE
10-11-11-95	20 mg daily	20	32	male	70	1.78	22.0932	NO	NKA	no			no			rivaroxaban	None	Congenital heart disease	66	0	0	41.5	39.64	99	93.3333	NONE	NONE	NONE	NONE	NONE	0	0	0	0	0	1	0	0	0	0	1		NONE	NONE
01-04-86-16	20 mg daily	20	32	female	81	1.54	34.1542	NO	NKA	yes		PE	no			rivaroxaban	None	PE, Sickle cell anemia	19	24	83	32.36	69.73	53	201.736	NONE	NONE	NONE	NONE	NONE	0	0	0	0	0	0	0	0	0	0	1		NONE	NONE
02-05-20-26	20 mg daily	20	32	male	78	1.7	26.9896	no	NKA	no			no			rivaroxaban	None	HTN, cardiomyopathy, asthma	221	185	83	34.68	13.61	113	91.115	NONE	NONE	NONE	NONE	NONE	0	0	0	0	0	1	0	0	0	0	0		NONE	NONE
00-99-31-04	20 mg daily	20	32	female	63.7	1.54	26.8595	NO	NKA	yes		DVT and PE	no			rivaroxaban	None	SLE, PERIPARTUM CARDIOMYOPATHY,SEVERE LVSD, DVT	251	321	124	37.04	18.96	54	155.711	NONE	NONE	NONE	NONE	NONE	0	0	0	0	0	0	0	0	0	0	0		NONE	NONE
01-04-44-00	20 mg daily	20	32	female	60.6	1.6	23.6719	NO	NKA	yes		DVT LEFT LEG	no			rivaroxaban	None		21	12	92	28	5.41	58	137.917	NONE	NONE	NONE	NONE	NONE	0	0	0	0	0	0	0	0	0	0	0		NONE	NONE
10-12-68-60	20 mg oral tablet, 1 tab(s), Oral, qPM	20	32	female	85	1.64	31.6032	NO	brufen	yes		PE	no			rivaroxiban	None	PE	18	20	85	35.95	5.38	53	211.698	NONE	NONE	NONE	NONE	NONE	0	0	0	0	0	0	0	0	0	1	0		NONE	NONE
00-87-00-94	20 mg, Oral, Daily	20	32	female	85	1.61	32.7919	NO	NKA	yes	42893	DVT in the left leg	no			rivaroxaban	None	limb pain	26	15	114	37.81	3.99	53	211.698	NONE	NONE	NONE	NONE	NONE	0	0	0	0	0	0	0	0	0	0	0		NONE	NONE
00-48-19-39	rivaroxaban 20 mg/ 1 tab(s) Oral Daily	20	32	M	135	1.73	45.1068	YES	NKA	NO	NONE	NONE	NONE	NONE	NONE	RIVA	NO	OBESE , DVT AFTER TRAVELING	35	14	84	31.8	12	59	302.034	NONE	NONE	NONE	NONE	NONE	0	0	0	0	0	0	0	0	0	0	0		NONE	NONE
00-19-71-73	rivaroxaban 20 mg/ 1 tab(s) Oral Daily	20	32	M	77.5	1.63	29.1693	NO	NKA	Yes	RECURRENT	DVT	NONE	NONE	NONE	RIVA	NO	EPILEPSY, RECURRENT DVT, MYSTHENIA GRAVIS POST THYMECTOMY	20	7	45	38.92	14.12	71	144.085	NONE	NONE	NONE	NONE	NONE	0	0	0	0	0	0	0	0	0	0	0		NONE	NONE
00-85-43-79	15 mg BID	30	32	female	104.7	1.555	43.2998	NO	NKA	yes		un-provoked cerebral venous thrombosis	no			rivaroxaban	None	PCOS , migraine, IDA	35	14	99	32.87	12	85	162.593	NONE	NONE	NONE	NONE	NONE	0	0	0	0	0	1	1	0	0	0	0		NONE	NONE
10-08-80-14	10 mg daily	10	33	male	104	1.63	39.1434	NO	NKA	no			no			rivaroxaban	None	Trauma to right lower limb	85	65	108	27	20.87	67	202.998	NONE	NONE	NONE	NONE	NONE	0	0	0	0	0	0	0	1	0	0	0		NONE	NONE
10-20-12-91	10 mg daily	10	33	female	58	1.62	22.1003	NO	penicillin	yes		Superficial vein thrombosis in the left basilic vein	no			rivaroxaban	None	Superficial vein thrombosis in the left basilic vein, Classical hodgkin disease	18	15	58	39.28	6.33	47	161.385	NONE	NONE	NONE	NONE	NONE	0	0	0	0	0	0	0	0	0	0	0		NONE	NONE
01-10-11-03	10 mg daily	10	33	male	78	1.71	26.6749	NO	NKA	yes	42491	chronic portal +splenic vein thrombosis	no			rivaroxaban	None	VTE, Post Gastric Sleeve surgery	27	22	80	41.97	17.22	70	145.724	NONE	NONE	NONE	NONE	NONE	0	0	0	0	0	0	0	0	0	0	0		NONE	NONE
10-23-28-41	10 mg daily	10	33	male	85	1.75	27.7551	NO	NKA	yes	43678	idiophathic DVT	no			rivaroxaban	None		19	0	0	38.7	6.05	104	106.886	NONE	0.3	NONE	NONE	NONE	0	0	0	0	0	0	0	0	0	0	0		NONE	NONE
10-22-73-99	15 mg daily	15	33	female	83	1.64	30.8596	NO	NKA	no			no			rivaroxaban	aspirin 81 mg	MVR, TVR, valvular hear disease, Pulmonary Hypertension TVR	28	32	87	30.52	9	40	271.364	NONE	NONE	NONE	NONE	NONE	0	0	0	0	0	0	0	0	0	0	0		NONE	NONE
00-77-64-51	rivaroxaban 15 mg/ 1 tab(s) Oral Daily	15	33	F	40	1.51	17.5431	NO	NKA	Yes	2020	DVT	NONE	NONE	NONE	RIVA	ASA	SCA, DVT THREE TIMES (1ST BEFORE 10 YEARS AFTER ABORTION, 2ND AFTER HIP REPLACEMENT SURGERY, RECEIVED RIVAROX, 3RD RECENTLY DURING HOSPITAL STAY , CHOLECYSTECTOMY	67	74	148	34	20.36	24	217.963	NONE	NONE	NONE	NONE	NONE	0	0	0	0	0	0	0	0	0	0	0		NONE	NONE
01-14-88-72	20 mg oral tablet, 20 mg, 1 tab(s), Oral, Daily	20	33	male	85.6	1.76	27.6343	yes	NKA	YES		DVT	NO			rivaroxiban	None	Hep.c ,HIV	40	38	160	31.31	6.54	51	219.502	NONE	NONE	NONE	NONE	NONE	0	0	0	0	0	0	0	0	0	0	0		NONE	NONE
10-05-61-30	20 mg daily	20	33	female	50.6	1.575	20.3981	NO	contrast media (iodine-based)	yes		SMV thrombosis, Portal vein thrombosis	no			rivaroxaban	None	asthma, Bowel ischemia, DVT, obesity	40	121	77	17	82.41	137	48.3019	NONE	NONE	NONE	NONE	NONE	0	0	0	0	0	1	1	0	0	0	1		NONE	NONE
01-06-49-64	20 mg daily	20	33	female	85.1	1.67	30.5138	NO	NKA	no			no			rivaroxaban	None	Thrombophilia, stroke	40	22	70	38.81	6.86	59	188.63	NONE	NONE	NONE	NONE	NONE	0	0	0	0	0	1	0	0	0	0	1		NONE	NONE
10-10-80-51	20 mg daily	20	33	female	101	1.7	34.9481	NO	NKA	no			yes			rivaroxaban	None	Afib, Congestive Heart Failure (Severely reduced LV systolic function, EF: <25%)	42	15	67	39.56	5.55	84	157.245	NONE	NONE	NONE	NONE	NONE	0	0	0	0	0	1	0	0	1	0	0		NONE	NONE
10-05-02-39	20 mg daily	20	33	female	68.7	1.56	28.2298	NO	NKA	yes		Rt UL DVT	no			rivaroxaban	None	Raynaud's phenomena, NSIP, DVT	29	23	41	41.44	5.62	60	149.741	NONE	NONE	NONE	NONE	NONE	0	0	0	1	0	0	0	0	0	0	0		NONE	NONE
01-00-36-28	20 mg daily	20	33	female	46	1.6	17.9687	NO	NKA	yes	29-9-2017	PE	no			rivaroxaban	None		19	0	0	48.4	4.28	42	143.233	NONE	0.27	NONE	NONE	NONE	0	0	0	0	0	0	0	0	0	0	0		NONE	NONE
10-17-55-71	20 mg daily	20	33	female	66.2	1.7	22.9066	NO	NKA	yes	43347	PE	no			rivaroxaban	None	PE	27	25	69	34.5	4.87	79	109.588	NONE	0.48	NONE	NONE	NONE	0	0	0	0	0	0	0	0	0	0	0		NONE	NONE
10-19-09-49	20 mg daily	20	33	male	114	1.74	37.6536	NO	brufen, DICLOFENAC	yes		Left lower limb Acute on chronic DVT	no			rivaroxaban	None	RTA, DVT	30	0	82	40.47	5.38	97	153.698	NONE	0.36	NONE	NONE	NONE	0	0	0	0	0	0	0	0	0	0	0		NONE	NONE
10-22-78-30	20 mg daily	20	33	male	92	1.71	31.4627	NO	NKA	yes	43745	Left portal vein thrombosis	no			rivaroxaban	None	Lap sleeve gastrectomy	31	30	60	41.05	13.94	65	185.101	NONE	0.27	NONE	NONE	NONE	0	0	0	0	0	0	0	0	0	0	0		NONE	NONE
01-16-18-51	20 mg daily qpm	20	33	female	127	1.58	50.8733	NO	Kaka (Persimmon),Kiwi	yes		PE	no			rivaroxiban	None		35	15	95	38.54	10.84	53	313.373	NONE	NONE	NONE	NONE	NONE	0	0	0	0	0	0	0	0	0	0	0		NONE	NONE
10-13-30-50	20 mg oral tablet, 1 tab(s), Oral, qPM	20	33	male	97	1.8	29.9383	yes	NKA	yes		DVT	no			rivaroxiban	None	DVT, sleeve gastrectomy	96	14	99	42.6	22.44	57	222.552	NONE	NONE	NONE	NONE	NONE	0	0	0	0	0	0	0	0	0	0	1		NONE	NONE
00-08-87-89	rivaroxaban 20 mg/ 1 tab(s) Oral Daily	20	33	F	61	1.61	23.533	NO	NKA	Yes	2018	DVT	NONE	NONE	NONE	RIVA	NO	LEFT ILIO FEMORAL AND POPLITEAL VEIN DVT	35	14	99	34	12	85	93.8523	NONE	NONE	NONE	NONE	NONE	0	0	0	0	0	0	0	0	0	0	0		NONE	NONE
00-10-29-28	rivaroxaban 20 mg/ 1 tab(s) Oral Daily	20	33	F	74	1.52	32.0291	NO	NKA	Yes	?	DVT	NONE	NONE	NONE	RIVA	NO	SLE, LUPUS NEPHRITIS, LEFT LEG DVT, SHE WAS PREVIOUSLY ON WARFARING THEN CHANGE TO RIVA.	18	10	51	35.96	8.72	90	107.528	NONE	NONE	NONE	NONE	NONE	0	0	0	0	0	0	0	0	0	0	0		NONE	NONE
00-61-69-58	rivaroxaban 20 mg/ 1 tab(s) Oral Daily	20	33	M	118	1.77	37.6648	NO	NKA	Yes	RECURRENT	DVT	NONE	NONE	NONE	RIVA	NO	HX OF RECURRENT DVT, KILENFILTER SYNDROME, LIFE LONG AC	39	31	87	27.43	6.98	51	302.584	NONE	NONE	NONE	NONE	NONE	0	0	0	0	0	0	0	0	0	0	0		NONE	NONE
10-15-02-75	15 mg BID for 17 days then 20 mg for 6 months	30	33	male	82.5	1.687	28.9884	NO	NKA	yes		DVT	no			rivaroxiban	None	Psoriatic arthritis,DVT	32	15	66	39.92	8.03	57	189.284	NONE	NONE	NONE	NONE	NONE	0	0	0	0	0	0	0	0	0	0	0		NONE	NONE
10-24-57-60	rivaroxaban 15mg tablet oral BID	30	33	M	66	1.7	22.8374	NO	NKA	NO	NONE	NONE	None	None	None	Rivaroxaban	None	DM, HYPERTHYROIDISM, NEW ONSET HF + MERS CO-VE +VE	31	18	84	23.6	7.97	64	134.865	None	4.31	None	None	None	0	0	0	0	0	1	0	0	1	1	1		NONE	NONE
10-01-79-87	10 mg daily	10	34	male	56.1	1.67	20.1155	yes	NKA	no			no			rivaroxaban	None	RIGHT FOOT BLUNT TRAUMA, POSTRO LATERAL ASPECT	22	23	87	44	6.21	70	103.83	NONE	NONE	NONE	NONE	NONE	0	0	0	0	0	0	0	0	0	0	0		NONE	NONE
00-99-93-32	10 mg daily for 45 days	10	34	female	49.9	1.65	18.3287	NO	NKA	no			no			rivaroxaban	None	BILATERAL HALLUX VALGUS	10	8	72	34.39	8.14	46	140.54	NONE	NONE	NONE	NONE	NONE	0	0	0	0	0	1	1	0	0	0	0		NONE	NONE
01-19-15-43	10 mg oral qpm	10	34	female	81	1.61	31.2488	NO	NKA	yes		DVT	no			rivaroxiban	None	DVT	35	14	99	34	12	85	123.459	NONE	NONE	NONE	NONE	NONE	0	0	0	0	0	0	0	0	0	0	0		NONE	NONE
00-89-44-03	10 mg, Oral, Daily	10	34	female	60	1.6	23.4375	NO	NKA	yes		DVT due to RTA	no			rivaroxaban	None	no	24	14	54	38.83	6.01	44	176.667	NONE	NONE	NONE	NONE	NONE	0	0	0	0	0	0	0	0	0	0	0		NONE	NONE
10-23-52-09	15 mg daily	15	34	male	88	1.6	34.375	NO	NKA	no			no			rivaroxaban	None	trauma, Pseudoaneurysm	26	16	225	28.57	5.25	60	190.015	NONE	NONE	NONE	NONE	NONE	0	0	0	0	1	0	0	0	0	0	0		NONE	NONE
02-10-90-75	15 mg daily	15	34	male	84.9	1.75	27.7224	NO	NKA	no			no			rivaroxaban	aspirin, 81 mg, Oral, Daily	Aortic aneurysm,Behcet's disease	45	23	145	42.28	13.05	86	127.898	NONE	NONE	NONE	NONE	NONE	0	0	0	0	0	0	0	0	0	0	0		NONE	NONE
10-24-05-51	15 mg daily	15	34	female	79.7	1.61	30.7473	NO	NKA	no			no			rivaroxaban	None	severe mitral valve stenosis, previous mitral valve valvoplasty	102	64	42	34.93	4.96	56	184.385	NONE	NONE	NONE	NONE	NONE	0	0	0	0	0	0	0	0	0	0	0		NONE	NONE
10-16-27-27	15 mg oral for 21 days then 20 mg oral daily	20	34	male	79	1.7	27.3356	NO	NKA	yes		DVT	no			rivaroxiban	None	DVT,Right Tibial plateau fracture	43	18	99	38.43	4.1	66	155.074	NONE	NONE	NONE	NONE	NONE	0	0	0	0	0	0	0	0	0	0	0		NONE	NONE
10-24-57-60	20 mg daily	20	34	male	77.5	1.71	26.5039	NO	NKA	yes		PE	no			rivaroxaban	None	dilated cardiomyopathy, DM, Hyperthyroidism	31	0	0	23.6	7.97	49	204.909	NONE	4.31	NONE	NONE	NONE	0	0	0	0	0	1	0	0	1	0	1		NONE	NONE
01-04-48-95	20 mg daily	20	34	female	84	1.68	29.7619	NO	NKA	no			no			rivaroxaban	None	pack pain, lower leg pain	20	19	55	26.75	2.46	42	259.111	NONE	NONE	NONE	NONE	NONE	0	0	0	0	0	1	0	0	0	0	1		NONE	NONE
01-08-17-85	20 mg daily	20	34	male	105.8	1.76	34.1555	NO	NKA	yes		LT iliofemoral , popliteal DVT	no			rivaroxaban	None	DVT	25	11	100	41.29	10.17	73	187.767	NONE	NONE	NONE	NONE	NONE	0	0	0	0	0	0	0	1	0	0	0		NONE	NONE
01-19-37-53	20 mg daily	20	34	female	95.2	1.58	38.1349	NO	NKA	yes		CVT	no			rivaroxaban	was on aspirin, 81 mg, Oral, Daily	ICA, Seizures	40	21	76	36.35	3.29	53	232.711	NONE	NONE	NONE	NONE	NONE	0	0	0	0	0	1	0	0	0	0	0		NONE	NONE
10-22-95-88	20 mg daily	20	34	female	56	1.52	24.2382	NO	unknown antibiotic	yes	29/7/2019	PE	no			rivaroxaban	None	congenital right hip displacement, Laproscopic Sleeve gastrectomy	18	18	57	36.88	12.88	50	145.102	NONE	NONE	NONE	NONE	NONE	0	0	0	0	0	0	0	0	0	0	0		NONE	NONE
00-86-34-24	20 mg orla qPM	20	34	female	79	1.6	30.8594	NO	NKA	yes	43211	Provoked DVT, left leg	no			rivaroxaban	None		17	16	62	35.34	6.78	51	200.684	NONE	NONE	NONE	NONE	NONE	0	0	0	0	0	0	0	0	0	0	0		NONE	NONE
00-55-02-84	rivaroxaban 20 mg/ 1 tab(s) Oral Daily	20	34	F	82	1.57	33.2671	NO	NKA	NO	NONE	NONE	NONE	NONE	NONE	RIVA	NO	SINUS THROMBOSISWHEN SHE GOT PREGNANT THEY SHIFT HER TO ENOXA AND NOW SHE IS ON WARF	35	14	99	34	12	85	124.983	NONE	NONE	NONE	NONE	NONE	0	0	0	0	0	0	0	0	0	0	0		NONE	NONE
00-82-11-35	rivaroxaban 20 mg/ 1 tab(s) Oral Daily	20	34	F	81	1.64	30.116	NO	NKA	NO	NONE	NONE	NONE	NONE	NONE	RIVA	NO	PROTEIN S DEFECIENCY AND HX OF LEFT LEG DVT	35	14	99	34	12	85	123.459	NONE	NONE	NONE	NONE	NONE	0	0	0	0	0	0	0	0	0	0	0		NONE	NONE
00-52-57-66	rivaroxaban 20 mg/ 1 tab(s) Oral Daily	20	34	M	79.4	1.64	29.5211	NO	NKA	NO	NONE	NONE	NONE	NONE	NONE	RIVA	NO	RECURRENT DVT, LAST EPISODE BEFORE 9 YEARS	40	20	63	41.24	6.95	92	111.812	NONE	NONE	NONE	NONE	NONE	0	0	0	0	0	0	0	0	0	0	0		NONE	NONE
00-40-95-17	rivaroxaban 20 mg/ 1 tab(s) Oral Daily	20	34	M	100	1.7	34.6021	NO	NKA	Yes	2013	DVT	NONE	NONE	NONE	RIVA	NO	RT LEG ANGIOLIPOMA, RT LEG DVT POST CATHETER INSERTION FOR VENOUS DILATION	35	14	99	34	12	85	152.418	NONE	NONE	NONE	NONE	NONE	0	0	0	0	0	0	0	0	0	0	0		NONE	NONE
01-20-80-05	10 mg daily	10	35	female	104.6	1.7	36.1938	NO	NKA	no			no			rivaroxaban	None	insertion of Copper IUD	17	17	74	36	12.63	68	197.407	NONE	NONE	NONE	NONE	NONE	0	0	0	0	0	0	0	0	0	0	0		NONE	NONE
10-20-38-95	10 mg daily	10	35	male	75	1.68	26.5731	NO	NKA	no			no			rivaroxaban	None	bilateral hip pain, bilateral avascular necrosis	65	24	136	35.88	5.24	74	130.068	NONE	NONE	NONE	NONE	NONE	0	0	0	0	0	0	0	0	0	0	0		NONE	NONE
10-17-72-88	10 mg daily	10	35	male	79	1.66	28.6689	NO	NKA	yes		DVT, PE	no			rivaroxaban	None	DVT, PE	27	21	46	43.16	6.81	79	128.333	NONE	NONE	NONE	NONE	NONE	0	0	0	0	0	0	0	0	0	0	0		NONE	NONE
00-97-38-64	rivaroxaban 15 mg Oral qPM, warfarin 4 mg and 3 mg Oral Daily	15	35	female	44.9	1.53	19.1807	NO	NKA	yes		Venous thrombosis	no			rivaroxaban and warfarin	None	Venous thrombosis	26	16	50	43.98	6.04	49	117.595	NONE	NONE	NONE	NONE	NONE	0	0	0	0	0	1	0	0	0	0	0		NONE	NONE
00-84-40-39	15mg po BID for 21 days then cont on 20mg daily for 3months	20	35	male	76	1.68	26.9274	yes	NKA	yes	06 jone, 2018	provoked acute superficial vein thrombosis at the left popliteal fossa	NONE	NONE	NONE	Rivaroxiban	NONE		35	14	99	38.8	12	85	114.745	NONE	NONE	NONE	NONE	NONE	0	0	0	0	0	0	0	0	0	0	0		NONE	NONE
00-99-62-75	20 mg daily	20	35	female	58	1.53	24.7768	NO	NKA	no			yes			rivaroxaban	None	ICD insertion in PSCC, ischemic stroke, Afib, ADHF	13	60	134	27.53	36.16	106	70.2201	NONE	NONE	NONE	NONE	NONE	0	0	0	0	0	1	0	1	0	0	1		NONE	NONE
01-07-41-91	20 mg daily	20	35	female	66	1.6	25.7812	NO	NKA	yes		DVT	no			rivaroxaban	None	DVT	11	9	64	37.19	6.41	55	154	NONE	NONE	NONE	NONE	NONE	0	0	0	0	0	0	0	0	0	0	1		NONE	NONE
01-20-49-16	20 mg daily	20	35	male	63	1.53	26.9127	NO	NKA	no			yes			rivaroxaban	None	LVSD, ICD, Afib, DILATED CARDIOMYOPATHY	20	26	124	30.04	13.07	101	80.0495	NONE	NONE	NONE	NONE	NONE	0	0	0	0	0	0	0	0	0	1	0		NONE	NONE
10-23-06-46	20 mg daily	20	35	female	82.1	1.53	35.072	NO	NKA	yes		DVT	no			rivaroxaban	None	DVT, hypothyrodisim	13	11	68	35.93	11.27	59	178.579	NONE	2.02	NONE	NONE	NONE	0	0	0	0	0	0	0	1	0	0	0		NONE	NONE
10-02-46-79	20 mg daily	20	35	female	54	1.57	21.9076	NO	NKA	yes		recurrent DVTs and Recurrent PEs	no			rivaroxaban	aspirin, 81 mg, Oral, Daily	SLE, Pulmonary Endarterectomy, recurrent DVTs and Recurrent Pes	20	1	80	35	6.16	74	93.6486	NONE	NONE	NONE	NONE	NONE	0	0	0	0	0	0	0	0	0	0	0		NONE	NONE
10-02-86-68	20 mg daily	20	35	female	50	1.54	21.0828	NO	NKA	yes		DVT ( LT ilio-femoral vein ), Left thigh mass	no			rivaroxaban	None	TB Lymphadenitis post treatment, Incidental right main pulmonary and lobar arteries pulmonary embolism, DVT, Left thigh mass	25	42	78	32.51	3.86	40	160.417	NONE	NONE	NONE	NONE	NONE	0	0	0	0	0	0	0	0	0	0	0		NONE	NONE
10-00-21-71	20 mg daily	20	35	male	90.3	1.685	31.8045	NO	NKA	yes		Left leg DVT	no			rivaroxaban	None	Left leg DVT	35	14	99	34	12	85	136.335	NONE	NONE	NONE	NONE	NONE	0	0	0	0	0	0	0	0	0	0	0		NONE	NONE
10-09-48-54	20 mg daily	20	35	female	60	1.5	26.6667	NO	NKA	no			yes	15/9/2019		rivaroxaban	None	Afib, HOCM s/p ICD insertion	87	135	43	30.86	19.97	79	97.4684	NONE	NONE	NONE	NONE	NONE	0	0	0	0	0	0	0	0	0	0	0		NONE	NONE
00-94-02-80	20 MG PO OD FOR 3 MONTHS	20	35	female	91	1.56	37.3932	NO	NKA	yes	42887	short sapheouns vein thrombosis	no			Rivaroxaban	None		17	11	79	35.57	5.1	57	204.883	NONE	NONE	NONE	NONE	NONE	0	0	0	0	0	1	1	0	0	0	1		NONE	NONE
00-79-65-52	rivaroxaban 20 mg/ 1 tab(s) Oral Daily	20	35	F	70	1.61	27.0051	NO	NKA	NO	NONE	NONE	NONE	NONE	NONE	RIVA	ASA	HYPOTHROIDISM, GRAVIS DISEASE, BILATERAL PE,	18	14	99	42	8.37	71	126.526	NONE	NONE	NONE	NONE	NONE	0	0	0	0	0	0	0	1	0	0	0		NONE	NONE
00-67-98-62	rivaroxaban 20 mg/ 1 tab(s) Oral Daily	20	35	M	88.5	1.74	29.2311	NO	NKA	NO	NONE	NONE	NONE	NONE	NONE	RIVA	ASA	PFO. STROKE . PCA BA,	31	19	55	38.08	8.05	64	177.461	NONE	NONE	NONE	NONE	NONE	0	0	0	0	0	0	0	0	0	0	0		NONE	NONE
00-76-09-17	rivaroxaban 20 mg/ 1 tab(s) Oral Daily	20	35	M	97	1.71	33.1726	NO	NKA	NO	NONE	NONE	NONE	NONE	NONE	RIVA	NO	BYPASS SURGERY, RECURRENT VTE 2008, 2017	35	14	99	34	12	85	146.451	NONE	NONE	NONE	NONE	NONE	0	0	0	0	0	0	0	0	0	0	0		NONE	NONE
00-31-14-22	rivaroxaban 20 mg/ 1 tab(s) Oral Daily	20	35	F	72	1.58	28.8415	NO	NKA	Yes	2018	DVT POST PARTUM	NONE	NONE	NONE	RIVA	NO	DVT TWICE POST PARTUM IN 2018	13	8	39	33.98	7.26	48	192.5	NONE	NONE	NONE	NONE	NONE	0	0	0	0	0	0	0	0	0	0	0		NONE	NONE
00-61-23-65	rivaroxaban 20 mg/ 1 tab(s) Oral Daily	20	35	M	87	1.65	31.9559	NO	NKA	Yes	2016	THROMBOSIS	NONE	NONE	NONE	RIVA	NO	SCD, RENAL VT 2007 AND 2009 ON WARFARIN AND CHANGE ITTO ENOXPARIN, SUBSEGMENTAL PE IN 2010, PORTAL VEIN THROMBOSIS JUNE 2016 WAS ON RIVA THEN SWITCHED IN JUL, 2019 TO ENOXAP B/C HE CAME WITH EXTENSION OF THROMBOSIS	24	22	97	38.89	9.27	86	129.826	NONE	NONE	NONE	NONE	NONE	0	0	0	0	0	0	0	0	0	0	0		NONE	NONE
00-78-27-51	rivaroxaban15MG BID THEN 20 mg/ 1 tab(s) Oral Daily	20	35	F	85	1.63	31.9922	NO	NKA	NO	NONE	NONE	NONE	NONE	NONE	RIVA	NO	DVT AFTER 4 HOURS JOURNEY AND HAVE VARICOSE VEINS	35	14	99	34	12	85	128.333	NONE	NONE	NONE	NONE	NONE	0	0	0	0	0	0	0	0	0	0	0		NONE	NONE
00-91-35-19	10 mg daily	10	36	female	88	1.51	38.5948	NO	NKA	yes		PROVOK RT LOWER DVT	no			rivaroxaban	aspirin, 81 mg, Oral, Daily	HTN, Chronic lower limb DVT, History of Multiple abscess, History of seizure	29	14	76	31.2	4.51	64	174.778	NONE	NONE	NONE	NONE	NONE	0	0	0	0	0	1	0	0	0	0	0		NONE	NONE
01-04-77-47	10 mg for 45 days	10	36	female	70.6	1.637	26.3456	NO	NKA	no			no			rivaroxaban	None	Bilateral Hallux valgus deformity	24	16	58	37.92	5.77	64	140.219	NONE	NONE	NONE	NONE	NONE	0	0	0	0	0	0	0	0	0	0	0		NONE	NONE
10-15-69-66	10 mg oral daily	10	36	female	64	1.58	25.6369	NO	NKA	yes		PE	NO			rivaroxiban	None	THR,SICKLE CELL DISSEASE ,	33	30	71	42.04	19.24	108	75.3251	NONE	NONE	NONE	NONE	NONE	0	0	0	0	0	0	0	0	0	0	0		NONE	NONE
00-64-31-88	rivaroxaban 10 mg/ 1 tab(s) Oral Daily	10	36	F	100	1.51	43.8577	NO	NKA	NO	NONE	NONE	NONE	NONE	NONE	RIVA	ASA	BOWEL ISCHEMIA 2013 DUE TO EMBOLISM, MULTIPLE ABORTION, HYPOTHYROIDISM	35	14	99	34	12	85	149.542	NONE	NONE	NONE	NONE	NONE	0	0	0	0	0	0	0	1	0	0	0		NONE	NONE
00-26-13-58	rivaroxaban 15 mg / 1 tab(s) Oral Daily	15	36	F	56	1.55	23.3091	NO	VIAGRA	NO	NONE	NONE	NONE	NONE	NONE	RIVA	NO	ANTICOAGULANT INDUCED BLEEDING, HTN, SLE, PULMONARY HTN, SPLENIC INFARCTION,	22	14	62	33.18	4.78	39	182.519	NONE	NONE	NONE	NONE	NONE	0	0	0	0	0	1	0	0	0	0	0		NONE	NONE
10-19-06-76	20 mg daily	20	36	female	108	1.663	39.0516	NO	NKA	yes		Portal vein thrombosis	no			rivaroxaban	None	DM, HTN, DLD, Portal vein thrombosis, Bowel ischemia	16	11	120	22.12	3.28	182	75.4286	NONE	NONE	NONE	NONE	NONE	0	0	0	0	0	1	1	0	0	0	1		NONE	NONE
10-08-70-86	20 mg daily	20	36	female	63	1.54	26.5643	NO	NKA	no			no			rivaroxaban	None	DM, thrombocytopenia, CVA, CNS vasculitis	29	21	74	37.76	5.91	36	222.444	NONE	NONE	NONE	NONE	NONE	0	0	0	0	0	0	0	1	0	0	0		NONE	NONE
00-96-82-34	20 mg daily	20	36	male	117	1.86	33.8189	yes	NKA	no			yes		Paroxysmal AF on rivaroxaban	rivaroxaban	None	DM, DLP, HTN, overweight, Afib	79	41	108	39.56	16.73	75	198.293	NONE	NONE	NONE	NONE	NONE	0	0	0	0	0	0	1	0	0	0	0		NONE	NONE
01-11-53-17	20 mg daily	20	36	female	90	1.56	36.9822	NO	NKA	yes		provoked DVT	no			rivaroxaban	None	DVT	35	14	99	34	12	38	301.053	NONE	0.27	NONE	NONE	NONE	0	0	0	0	0	0	0	0	0	0	0		NONE	NONE
10-09-21-37	20 mg daily	20	36	female	73	1.58	29.2421	NO	NKA	yes	42583	DVT, C/S thrombosis	no			rivaroxaban	None	C-section throbosis, DVT	22	16	74	38.04	3.95	58	159.985	NONE	NONE	NONE	NONE	NONE	0	0	0	0	0	0	0	0	0	0	0		NONE	NONE
10-24-15-77	20 mg daily	20	36	female	68	1.63	25.5937	NO	NKA	yes		Chronic DVT detected in left lower limb veins, Acute thrombus detected in left long saphenous vein	no			rivaroxaban	None	depression, Seizure, DVT	15	11	58	38.74	4.38	61	141.698	NONE	NONE	NONE	NONE	NONE	0	0	0	0	0	0	0	0	0	0	0		NONE	NONE
10-22-74-56	20 mg daily	20	36	male	101	1.6	39.4531	yes	NKA	yes	27/6/2019	PE	no			rivaroxaban	None	PE	23	9	82	33.71	7.32	84	152.836	NONE	1.24	NONE	NONE	NONE	0	0	0	0	0	0	0	0	0	0	0		NONE	NONE
00-91-12-02	20 mg oral tablet, 1 tab(s), Oral, qPM	20	36	male	98	1.69	34.3125	NO	NKA	yes		massive PE	no			rivaroxaban	None	At risk for injury due to fall	79	30	102	39	10.28	117	106.469	NONE	3.56	NONE	NONE	NONE	0	0	0	0	0	0	0	0	0	0	0		NONE	NONE
01-15-31-44	20 mg oral tablet, 1 tab(s), Oral, qPM, 2mg oral 5x/wk	20	36	female	82.3	1.524	35.4348	NO	NKA	no			no			rivaroxiban, warfarin	None	hypothyrodsim,portal vein thrombosis	28	23	81	38.64	8.78	45	232.472	NONE	NONE	NONE	NONE	NONE	0	0	0	0	0	0	0	0	0	0	0		NONE	NONE
10-09-41-87		20	36	female	110	1.6	42.9687	NO	Augmentin	yes		DVT, PE	no			rivaroxaban	None	recurrent DVTs, Autoimmune syndrome, Recurrent Cellulitis, A.V.N ( Bilateral Knees ), Retroperitoneal fibrosis,lymphangioma circumscriptum	14	12	82	26.27	2.62	82	170.515	NONE	NONE	NONE	NONE	NONE	0	0	0	0	0	1	0	0	0	0	1		NONE	NONE
00-38-57-93	rivaroxaban 20 mg/ 1 tab(s) Oral Daily	20	36	F	44.8	1.515	19.5188	NO	NKA	NO	NONE	NONE	NONE	NONE	NONE	RIVA	NO	SUPERIOR VANA CAVA SYNDROME, BILATERAL JUGULAR VEIN THROMBOSIS, SPLENIC INFARCTION, BILATERAL RENAL MASSES	16	17	69	35.27	6.55	85	66.995	NONE	NONE	NONE	NONE	NONE	0	0	0	0	0	0	0	0	0	0	0		NONE	NONE
00-47-42-45	rivaroxaban 20 mg/ 1 tab(s) Oral Daily	20	36	F	62	1.52	26.8352	NO	NKA	NO	NONE	NONE	NONE	NONE	NONE	RIVA	NO	SICKLE CELL, DISTAL FEMUR FRACTURE IN AUG, 2019 WHILE SHE WAS PREGNANT AND COMPLICATED BY LEFT POPLITEAL VEIN THROMBOSIS	18	24	96	40.03	34.93	43	183.276	NONE	NONE	NONE	NONE	NONE	0	0	0	0	0	0	0	0	0	0	0		NONE	NONE
00-74-58-42	rivaroxaban 20 mg/ 1 tab(s) Oral Daily	20	36	M	93	1.81	28.3874	NO	NKA	NO	NONE	NONE	NONE	NONE	NONE	RIVA	NO	PUL.HTN, ULCERATIVE COLITIS, DVT MORE THAN 10 YEARS BACK SECONDARY TO IBD OR THROMBOPHILIA IN FAMILY, PATIENT NOT RIVA ANY MORE , HE IS ON WARFARIN , SEVERE RV DILATION WITH SEVERE RVH	35	14	99	34	12	85	139.075	NONE	NONE	NONE	NONE	NONE	0	0	0	0	0	0	0	0	0	0	0		NONE	NONE
00-32-65-16	rivaroxaban 20 mg/ 1 tab(s) Oral Daily	20	36	F	76	1.68	26.9274	NO	NKA	Yes	2010	DVT	NONE	NONE	NONE	RIVA	NO	SEIZURE, RECURRENT DVT FIRST 2010,	35	14	99	34	12	85	113.652	NONE	NONE	NONE	NONE	NONE	0	0	0	0	0	0	0	0	0	0	0		NONE	NONE
00-95-22-13	15 mg BID for 21 days then 20 mg daily for 6 months	30	36	female	88	1.61	33.9493	NO	NKA	yes		PE 2RY TO DVT	no			rivaroxaban	None	DVT, PE	37	29	77	34	3.03	68	164.497	NONE	1.28	NONE	NONE	NONE	0	0	0	0	0	0	0	0	0	0	0		NONE	NONE
01-12-83-76	10 mg daily	10	37	female	80	1.7	27.6817	yes	NKA	yes		DVT	no			rivaroxaban	None	Asthma, depression, PCO, migraine, DVT	13	12	57	33.44	2.89	47	214.279	NONE	NONE	NONE	NONE	NONE	0	0	0	0	0	0	0	1	0	0	0		NONE	NONE
10-00-87-07	10 mg daily	10	37	male	109	1.8	33.642	NO	NKA	no			no			rivaroxaban	None	right forearm pain	33	14	0	42.84	13.24	83	165.324	NONE	NONE	NONE	NONE	NONE	0	0	0	0	0	0	0	0	0	0	0		NONE	NONE
10-23-44-31	10 mg daily	10	37	male	86	1.84	25.4017	NO	NKA	yes		Portal vein thrombosis post splenectomy	no			rivaroxaban	None	VTE, auto-immune hemolytic anemia	44	51	94	45.05	32.58	123	88.0199	NONE	NONE	NONE	NONE	NONE	0	0	0	0	0	0	0	0	0	0	0		NONE	NONE
00-79-76-51	rivaroxaban 10 mg/ 1 tab(s) Oral Daily	10	37	F	70	1.55	29.1363	NO	NKA	NO	NONE	NONE	NONE	NONE	NONE	RIVA	NO	MS, PE, CONVERSION DISOREDER	21	16	83	33.94	4.1	47	187.494	NONE	NONE	NONE	NONE	NONE	0	0	0	0	0	0	0	0	0	0	0		NONE	NONE
00-43-99-34	rivaroxaban 10 mg/ 1 tab(s) Oral Daily	10	37	M	135	1.75	44.0816	NO	NKA	Yes	RECURRENT	DVT	NONE	NONE	NONE	RIVA	NO	RECURRENT PROVOKED DVT	36	20	82	42.03	8.35	66	257.5	NONE	NONE	NONE	NONE	NONE	0	0	0	0	0	0	0	0	0	0	0		NONE	NONE
00-84-74-08	1 tab 15 mg, Oral, qPM for 3 months, then 1 tab 20 mg qPM for 3 months	20	37	male	80	1.6	31.25	yes	NKA	yes	43768	thoraci and abdomen	no			rivaroxaban	None		35	14	99	34	12	85	118.484	NONE	NONE	NONE	NONE	NONE	0	0	0	0	0	0	0	0	0	0	0		NONE	NONE
01-07-82-11	20 mg daily	20	37	male	86	1.78	27.143	NO	NKA	no			no			rivaroxaban	None		39	21	90	41.16	9.29	86	125.889	NONE	NONE	NONE	NONE	NONE	0	0	0	0	0	1	0	0	0	0	1		NONE	NONE
01-07-38-81	20 mg daily	20	37	female	85	1.78	26.8274	NO	NKA	no			no			rivaroxaban	None	left knee pain	35	14	99	34	12	85	125.889	NONE	NONE	NONE	NONE	NONE	0	0	0	0	0	0	0	0	0	0	1		NONE	NONE
10-18-40-23	20 mg daily	20	37	female	87	1.64	32.3468	NO	NKA	yes		PE, DVT	no			rivaroxaban	None	HTN, PHTN, Systemic Lupus Erythematosus, PE, DVT	69	39	665	29.22	69.86	43	254.705	NONE	NONE	NONE	NONE	NONE	0	0	0	0	0	1	0	0	0	0	0		NONE	NONE
00-99-49-41	20 mg daily	20	37	female	72	1.635	26.9338	NO	NKA	yes	22-9-2016	DVT	no			rivaroxaban	None		13	20	159	26.28	10.14	55	164.8	NONE	NONE	NONE	NONE	NONE	0	0	0	0	0	0	0	0	0	0	0		NONE	NONE
01-20-23-91	20 mg daily	20	37	female	89	1.56	36.5713	NO	NKA	yes		Bilateral Extensive DVT	no			rivaroxaban	None	Ulcerative colitis , DVT	20	17	96	39	10.54	67	167.226	NONE	NONE	NONE	NONE	NONE	0	0	0	0	0	0	0	0	0	0	0		NONE	NONE
10-17-90-25	20 mg daily	20	37	female	66.4	1.66	24.0964	NO	NKA	yes	43195	DVT	no			rivaroxaban	None	DVT	16	9	49	37.36	8.85	50	167.18	NONE	NONE	NONE	NONE	NONE	0	0	0	0	0	0	0	0	0	0	0		NONE	NONE
01-07-51-73	20 mg daily	20	37	female	74.4	1.622	28.2795	SHEESHA SMOKER	NKA	yes		SUBSEGMENTAL ACUTE PULMONARY EMBOLISM	no			rivaroxaban	None	PE, UMBILICAL HERNIA	41	32	87	36.94	6.41	72	130.085	NONE	3.02	NONE	NONE	NONE	0	0	0	0	0	0	0	0	0	0	0		NONE	NONE
01-17-81-74	20 mg ora qpm	20	37	female	67	1.56	27.5312	NO	NKA	no			no			rivaroxiban	None	dry skin , vit D defcincy	27	16	80	40.24	8.3	63	133.882	NONE	NONE	NONE	NONE	NONE	0	0	0	0	0	1	0	0	0	0	0		NONE	NONE
00-90-73-03	20 mg oral daily	20	37	female	93	1.572	37.6338	NO	NKA	yes		Lt LL DVT	no			rivaroxaban	None	Chronic menorrhagia, IDA, hypothyrodism, gastric sleeve, obesity	29	14	77	36.26	5.72	60	195.128	NONE	NONE	NONE	NONE	NONE	0	0	0	0	0	0	0	1	0	0	0		NONE	NONE
01-17-47-52	20 mg oral qpm for 21 days	20	37	male	89.5	1.6	34.9609	NO	NKA	yes		ODVT	NO			rivaroxiban	None	ODVT	62	23	49	42	5.96	64	176.048	NONE	NONE	NONE	NONE	NONE	0	0	0	0	0	1	0	0	0	0	1		NONE	NONE
10-11-61-67	20 mg oral tablet, 1 tab(s), Oral, qPM	20	37	female	77	1.565	31.4385	NO	NKA	yes		DVT	NO			rivaroxiban	None	DVT	17	12	78	35.56	6.08	44	220.306	NONE	NONE	NONE	NONE	NONE	0	0	0	0	0	1	0	0	0	1	0		NONE	NONE
10-12-54-85	20 mg oral tablet, 1 tab(s), Oral, qPM	20	37	male	72	1.72	24.3375	NO	NKA	no			no			rivaroxiban	None		34	23	87	41.49	10.13	78	116.205	NONE	NONE	NONE	NONE	NONE	0	0	0	0	0	1	0	0	0	0	0		NONE	NONE
00-92-44-67	20 mg, Oral, qPM,	20	37	female	51.7	1.58	20.7098	NO	NKA	no			no			rivaroxaban	None	SLE, APS, Lt. Hemiparesis	20	9	56	35.76	8.64	46	141.488	NONE	NONE	NONE	NONE	NONE	0	0	0	0	0	0	0	0	0	0	0		NONE	NONE
00-02-87-01	rivaroxaban 20 mg/ 1 tab(s) Oral Daily	20	37	M	86.5	1.74	28.5705	NO	NKA	Yes	2016	PE	NONE	NONE	NONE	RIVA	NO	SCD, PE IN 2016,	35	14	99	34	12	85	128.11	NONE	NONE	NONE	NONE	NONE	0	0	0	0	0	0	0	0	0	0	0		NONE	NONE
00-42-29-82	rivaroxaban 20 mg/ 1 tab(s) Oral Daily	20	37	M	103	1.75	33.6327	NO	NKA	Yes	2015	DVT	NONE	NONE	NONE	RIVA	NO	PERSISTANT LEUKOCYTOSIS, EXTENSIVE DVT,	35	14	99	34	12	85	152.548	NONE	NONE	NONE	NONE	NONE	0	0	0	0	0	0	0	0	0	0	0		NONE	NONE
00-80-48-05	rivaroxaban 20 mg/ 1 tab(s) Oral Daily	20	37	M	70.1	1.701	24.2275	NO	NKA	Yes	2019	DVT	NONE	NONE	NONE	RIVA	NO	IN JUNE 2018 PATIENT HAD RTA===DECOMPRESSIVE CRANIECTOMY, AFTER 4 MONTHS BACK HE DEVELOPED A HX OF RIGHT LL SWELLING DVT AND STARTED RIVAR. IN APRIL 2019 HAD ANOTHER RTA AND DEVELOPED PROVOKED LL DVT. IN MAY 2019 HEMATOLOGY TEAM DECIDE TO STOP RIVA , THEY ADVICE TO KEEP HIM ON ENOXA DURING HOSPITAL ADMISSIN OR TRAVEL, PATIENT RESUME AGAIN RIVA IN 2/2020	295	119	142	34.68	4.99	78	113.139	NONE	NONE	NONE	NONE	NONE	0	0	0	0	0	0	0	0	0	0	0		NONE	NONE
10-01-32-54	10 mg daily	10	38	male	64.8	1.6	25.3125	NO	NKA	yes	42125	Provoked bilateral Acute DVT of both Ilio-femoral veins	no			rivaroxaban	None	DVT, Teratoma removed, Abdominal surgery,	28	19	71	39.14	15.91	92	87.8087	NONE	0.46	NONE	NONE	NONE	0	0	0	0	0	0	0	0	0	0	0		NONE	NONE
00-40-84-68	rivaroxaban 10 mg/ 1 tab(s) Oral Daily	10	38	F	52.6	1.55	21.8939	NO	NKA	Yes	2020	DVT	NONE	NONE	NONE	RIVA	NO	MS, SEIZURE, CHRONIC DVT IN LL	28	13	96	26.7	5.87	24	273.228	NONE	NONE	NONE	NONE	NONE	0	0	0	0	0	0	0	0	0	0	0		NONE	NONE
10-09-00-87	15 mg daily	15	38	F	125.9	1.7	43.564	NO	EGG, latex, milk, YOGURT	no			no			rivaroxaban	None	POST SLEEVE GASTRECTOMY, GASTRIC PERFORATION,PERITONITIS, SEPTIC SHOCK	24	13	86	29	9.56	50	313.911	NONE	3.54	NONE	NONE	NONE	0	0	0	0	0	1	0	0	0	0	1		NONE	NONE
00-56-76-47	rivaroxaban 15 mg / 1 tab(s) Oral Daily	15	38	F	61	1.56	25.0657	NO	NKA	NO	NONE	NONE	NONE	NONE	NONE	RIVA	NO	SLE, HX OF CVT, SEIZURE DISORDER, MIGRAINE, ENDOMETRIOSIS	12	10	47	33.25	7.52	59	128.893	NONE	NONE	NONE	NONE	NONE	0	0	0	0	0	0	0	0	0	0	0		NONE	NONE
00-87-96-99	15 mg oral tablet, 1 tab(s), Oral, q12hr, the 20 mg oral tablet, 1 tab(s), Oral, qPM	20	38	female	63.3	1.51	27.7619	NO	NKA	yes		Provoked DVT	no			rivaroxaban	None	fructure of left leg	37	0	0	34.1	6.81	53	148.894	NONE	NONE	NONE	NONE	NONE	0	0	0	0	0	0	0	0	0	0	0		NONE	NONE
01-03-61-34	20 mg daily	20	38	male	119	1.73	39.7608	NO	NKA	yes		PROVOKE DVT RT	no			rivaroxaban	aspirin 81 mg daily		41	16	96	39.44	8.94	58	255.782	NONE	NONE	NONE	NONE	NONE	0	0	0	0	0	1	0	0	0	0	1		NONE	NONE
01-03-37-94	20 mg daily	20	38	female	131	1.645	48.4105	no	egg-containing compound	yes		DVT unprovoked	no			rivaroxaban	None	DM, DLD, DVT	31	10	60	38.53	13.81	69	236.686	NONE	NONE	NONE	NONE	NONE	0	0	0	1	1	0	0	0	0	0	0		NONE	NONE
10-10-19-70	20 mg daily	20	38	male	121	1.825	36.3295	NO	NKA	yes		provoked DVT	no			rivaroxaban	aspirin, 81 mg, Oral, Daily, plavix 75 mg, Oral, Daily	DVT, IHD, HTN, DM, POST RTA	32	21	183	35.77	12.92	86	175.403	NONE	NONE	NONE	NONE	NONE	0	0	0	0	0	0	0	0	0	0	0		NONE	NONE
10-01-96-41	20 mg daily	20	38	male	70	1.7	24.2215	NO	NKA	no			no			rivaroxaban	None	jejunostomy tube blocked, Abdominal pain, anxiety	46	33	63	40.77	12.2	79	110.464	NONE	NONE	NONE	NONE	NONE	0	0	0	0	0	0	0	0	0	0	0		NONE	NONE
10-22-17-06	20 mg daily	20	38	male	53	1.61	20.4467	NO	NKA	yes		SMV+ PV thrombosis	no			rivaroxaban	None	chronic pancreatitis, complicated by necrosis, multiple collections and PD stones, DM VTE	28	18	72	41.37	20.57	64	103.24	NONE	NONE	NONE	NONE	NONE	0	0	0	0	0	0	0	0	0	0	0		NONE	NONE
10-12-92-62	20 mg oral tablet, 1 tab(s), Oral, qPM	20	38	female	73	1.7	25.2595	NO	NKA	yes		PE	no			rivaroxiban	None	PE	21	14	99	32.1	2.26	43	211.643	NONE	NONE	NONE	NONE	NONE	0	0	0	0	0	1	1	1	0	0	1		NONE	NONE
10-11-77-31	20 mg orally daily	20	38	male	66	1.69	23.1084	NO	NKA	yes		DVT	NO		A-fib	rivaroxiban, warfarin	None	DVT	47	23	148	37.08	8.04	70	117.543	NONE	NONE	NONE	NONE	NONE	0	0	0	0	0	0	0	1	0	0	0		NONE	NONE
00-93-06-59	20 mg, 1 tab(s), Oral, Daily	20	38	male	101.2	1.72	34.2077	NO	NKA	yes		PE and B/L lower limbs DVT	no			rivaroxaban	None	BA, Secondary adrenal insufficiency, Osteoporosis	18	16	76	31.14	5.23	57	221.338	NONE	NONE	NONE	NONE	NONE	0	0	0	0	0	0	0	0	0	0	0		NONE	NONE
00-96-21-65	20 mg, Oral, qPM	20	38	male	58.1	1.62	22.1384	NO	NKA	yes	2014	FIRST ONE PROVOKED , SECOND ONE UNPROVOKED	no			rivaroxaban	None	deaf	18	16	90	36.98	10.12	77	94.0667	NONE	NONE	NONE	NONE	NONE	0	0	0	0	0	0	0	0	0	0	1		NONE	NONE
00-50-35-30	rivaroxaban 20 mg/ 1 tab(s) Oral Daily	20	38	M	80	1.7	27.6817	no	NKA	NO	NONE	NONE	NONE	NONE	NONE	RIVA	NO	LEFT VENTRICULAR THROMBUS, DILATED CARDIOMYOPATHY SECONDARY TO DRUF, ACOHOL ABUSE, DECOMPENSATED HF WITH EF 10-15%DUE TO MEDICATION NON COMPLIANCE WHICH RESULTED IN ISCHEMIC HEPATITIS AND AKI	32	24	98	41.2	13.09	87	114.636	NONE	NONE	NONE	NONE	NONE	0	0	0	0	0	1	0	0	0	1	0		NONE	NONE
00-50-20-13	rivaroxaban 20 mg/ 1 tab(s) Oral Daily	20	38	F	77	1.58	30.8444	NO	NKA	NO	NONE	NONE	NONE	NONE	NONE	RIVA	ASA	DURAL VENOUS THROMBOSIS SECONDARY YO OCP 11-2016 ON RIVA 20MG OD FOR 1 YEAR THEN SHIFTED TO ASA FOR ANOTHER MORE YEAR	16	11	82	35.96	4.04	54	177.765	NONE	NONE	NONE	NONE	NONE	0	0	0	0	0	0	0	0	0	0	0		NONE	NONE
00-26-15-88	rivaroxaban 20 mg/ 1 tab(s) Oral Daily	20	38	M	59	1.51	25.8761	NO	AMOXICILLIN, BANANA, EGG, EGGPLANT,	NO	NONE	NONE	NONE	NONE	NONE	RIVA	NO	NF WITH MULTIPLE INTRACRANIAL LESION, SPINAL LESION, SLEEVE GASTRECTOMY, LEFT OCULAR LESION ,	36	20	76	16.05	6.68	58	126.816	NONE	NONE	NONE	NONE	NONE	0	0	0	0	0	0	0	0	0	0	0		NONE	NONE
00-70-51-76	rivaroxaban 20 mg/ 1 tab(s) Oral Daily	20	38	M	64	1.7	22.1453	NO	NKA	NO	NONE	NONE	NONE	NONE	NONE	RIVA	NO	POST ORIF OF RIGHT TIBIAL PLATEAU	35	14	99	34	12	85	93.8667	NONE	NONE	NONE	NONE	NONE	0	0	0	0	0	0	0	0	0	0	0		NONE	NONE
00-60-10-03	rivaroxaban15MG BID THEN 20 mg/ 1 tab(s) Oral Daily	20	38	M	104.6	1.66	37.9591	NO	NKA	Yes	NONE	NONE	NONE	NONE	NONE	RIVA	ASA	T2DM, HTN, BA, UNPROVOKED DVT, DLD, IHD, SIGLE VESSEL DISEASE SVD	44	29	91	40.04	12.22	77	169.352	NONE	NONE	NONE	NONE	NONE	0	0	0	0	0	1	1	0	0	0	1		NONE	NONE
01-15-60-73	10 mg, Oral, Daily	10	39	male	65	1.75	21.2245	NO	NKA	yes		PVT, SVT, SMVT, HVT	no			rivaroxiban	None	IDA, Extensive Visceral Thrombosis	46	42	119	36.08	11.1	65	123.444	NONE	NONE	NONE	NONE	NONE	0	0	0	0	0	1	0	0	1	0	1		NONE	NONE
01-07-20-07	10 mg daily	10	39	female	72.5	1.64	26.9557	NO	NKA	no			no			rivaroxaban	None	foot drop	21	17	74	39.68	11.08	59	151.69	NONE	NONE	NONE	NONE	NONE	0	0	0	0	0	1	0	1	0	0	1		NONE	NONE
10-17-22-33	10 mg daily	10	39	male	63.3	1.71	21.6477	NO	NKA	yes	PE on 3/4/2018 and portal vein thrombosis on 12-4-2018	PE, portal vein thrombosis	no			rivaroxiban	None	PE, LAMN, Rt solitary kidney	26	15	106	40.7	6.52	97	80.557	NONE	NONE	NONE	NONE	NONE	0	0	0	0	0	1	1	1	0	0	0		NONE	NONE
10-05-59-80	10 mg daily	10	39	female	99	1.64	36.8084	NO	NKA	yes		intraabdominal thrombosis	no			rivaroxaban	None	Clotting disorder, intraabdominal thrombosis	19	22	88	34.01	15.64	59	207.136	NONE	NONE	NONE	NONE	NONE	0	0	0	1	0	0	0	0	0	0	0		NONE	NONE
10-05-68-89	10 mg daily	10	39	female	83	1.65	30.4867	NO	NKA	no			no			rivaroxaban	None	HALLUX VALGUS, FULL LEFT FOOT RECONSTRUCTION, hypothyrodism	29	21	56	37.22	11.81	63	162.633	NONE	NONE	NONE	NONE	NONE	0	0	0	0	0	0	0	0	0	0	0		NONE	NONE
10-03-41-29	10 mg daily	10	39	female	99	1.7	34.2561	NO	NKA	yes		Extensive portal vein thrombosis	no			rivaroxaban	None	MDS/MPN, splenectomy, Chronic anemia, DVT	13	10	70	36.41	15.15	64	190.953	NONE	NONE	NONE	NONE	NONE	0	0	0	0	0	0	0	0	0	0	0		NONE	NONE
00-14-14-39	rivaroxaban 10 mg Oral Daily	10	39	M	95.5	1.71	32.6596	YES	NKA	NO	NONE	NONE	NONE	NONE	NONE	RIVA	ASA	HTN, TIA, REMNANT PFO, ON DUAL ANTICOAGULANT	48	19	100	40.19	14.44	80	147.362	NONE	NONE	NONE	NONE	NONE	0	0	0	0	0	1	0	0	0	0	0		NONE	NONE
01-14-03-40	20 mg daily	20	39	female	97.7	1.51	42.849	no	NKA	yes		DVT	no			rivaroxaban	None	DVT	27	17	99	32.42	7.52	57	211.588	NONE	6.27	NONE	NONE	NONE	0	0	0	0	0	0	0	0	0	0	1		NONE	NONE
10-21-03-00	20 mg daily	20	39	male	80	1.6	31.25	NO	NKA	yes		Left ventricular thrombus	no			rivaroxaban	None	DVT, HF, fibromyalegia	35	14	99	34	12	85	116.183	NONE	NONE	NONE	NONE	NONE	0	0	0	0	0	0	0	0	0	1	0		NONE	NONE
10-18-17-68	20 mg daily	20	39	male	84.8	1.77	27.0676	NO	NKA	no			no			rivaroxaban	None	AKI, Pedestrian trauma	51	72	130	22.59	30.29	70	149.544	NONE	14.17	NONE	NONE	NONE	0	0	0	0	0	1	1	1	0	0	0		NONE	NONE
01-01-65-79	20 mg daily	20	39	female	60	1.58	24.0346	NO	NKA	yes		DVTs	no			rivaroxaban	None	DVTs	26	17	82	17.7	2.62	37	200.18	NONE	NONE	NONE	NONE	NONE	0	0	0	0	0	0	1	0	0	0	0		NONE	NONE
10-01-73-53	20 mg daily	20	39	female	56	1.44	27.0062	NO	NKA	yes	2015	ACUTE LEFT LIMB DVT ( PROVOKED)	no			rivaroxaban	None	anemia, DVT	21	14	140	34	4.2	54	128.016	NONE	6.46	NONE	NONE	NONE	0	0	0	0	0	0	0	0	0	0	0		NONE	NONE
10-18-87-42	20 mg daily	20	39	male	98	1.88	27.7275	NO	NKA	yes	PE May 2017, Portal vien thrombosis provoked 11/11/2018	PE, DVT	no			rivaroxaban	None	PE, DVT	132	40	103	39.47	5.33	82	147.531	NONE	NONE	NONE	NONE	NONE	0	0	0	0	0	0	0	0	0	0	0		NONE	NONE
01-00-28-70	20 mg daily	20	39	female	70.3	1.635	26.2978	NO	NKA	no			yes			rivaroxaban	None	RHD, AFIB	22	28	98	30.65	11.43	57	152.248	NONE	NONE	NONE	NONE	NONE	0	0	0	0	0	0	0	0	0	0	0		NONE	NONE
10-20-33-80	20 mg daily	20	39	male	100	1.73	33.4124	NO	NKA	no			yes		atrial flutter	rivaroxaban	None	TIA, atrial flutter	28	30	204	23.55	40.22	75	164.593	NONE	NONE	NONE	NONE	NONE	0	0	0	0	0	0	0	0	0	0	0		NONE	NONE
01-02-87-24	20 mg daily	20	39	male	66	1.87	18.8739	yes	NKA	no			yes		A. flutter	rivaroxaban	None	A. flutter, hyperthyrodism, DCM	51	25	76	44.14	5.82	55	148.133	NONE	NONE	NONE	NONE	NONE	0	0	0	0	0	0	0	0	0	0	0		NONE	NONE
10-11-74-57	20 mg orally daily	20	39	female	101	1.58	40.4583	NO	NKA	no			yes		A-fib	rivaroxiban, warfarin	None	HTN,AFIB,HYPOTHYRODSIM	26	17	65	29.8	7.08	92	135.521	NONE	NONE	NONE	NONE	NONE	0	0	0	0	0	1	0	0	0	0	0		NONE	NONE
00-91-36-56	20 mg qPM	20	39	male	89	1.73	29.737	NO	Ibuprofen IB, diclofenac	yes	22-5-2018	Lt. femoropopliteal DVT.	no			rivaroxaban	aspirin, 81 mg, Oral, Daily	DVT, left 5th metatarsal base fracture	21	11	76	41.91	4.69	83	132.368	NONE	0.27	NONE	NONE	NONE	0	0	0	0	0	0	0	0	0	0	0		NONE	NONE
00-79-00-89	rivaroxaban 20 mg/ 1 tab(s) Oral Daily	20	39	M	99	1.78	31.2461	NO	NKA	NO	NONE	NONE	NONE	NONE	NONE	RIVA	NO	APS, DVT, DM, HTN	47	20	71	41.1	7.6	78	156.679	NONE	NONE	NONE	NONE	NONE	0	0	0	0	0	1	0	0	0	0	1		NONE	NONE
00-22-77-99	rivaroxaban 20 mg/ 1 tab(s) Oral Daily	20	39	M	142	1.68	50.3118	NO	NKA	Yes	?	DVT, PE	NONE	NONE	NONE	RIVA	NO	DLD, THYROIDECTOMY, INFERTILE, MULTIPLE DVTS AND ONE PE, GASTRECTOMY 2011, BYPASS SURGERY 2015, CHOLECYSTECTOMY 2016	31	22	69	34.7	8.73	71	246.889	NONE	NONE	NONE	NONE	NONE	0	0	0	0	0	1	0	0	0	0	0		NONE	NONE
00-75-03-00	rivaroxaban 20 mg/ 1 tab(s) Oral Daily	20	39	F	92	1.58	36.8531	NO	NKA	NO	NONE	NONE	NONE	NONE	NONE	RIVA	ASA	ACUTE CHOLECYSTITIS, GASTRIC SLEEVE, PORTAL VEIN THROMBOSIS, PATIENT ON ASA AND ENOXAPB/C SHE WAS PREGNANT IN LAST 2019, SHE HAD ANOTHER APPOINTMENT AFTER 4 MONTHS, BA	10	15	78	27.18	4.82	47	241.636	NONE	NONE	NONE	NONE	NONE	0	0	0	0	0	0	0	0	0	0	0		NONE	NONE
00-21-84-26	rivaroxaban 20 mg/ 1 tab(s) Oral Daily	20	39	F	66.85	1.635	25.0072	NO	NKA	Yes	RECURRENT	DVT	NONE	NONE	NONE	RIVA	NO	MS 15 YEARS AGO, SLE RECENTLY DIAGNOSED, ARTHRITIS, APS, DVT, LUPUS NEPHRITIS.	24	13	52	36.7	3.98	50	165.045	NONE	NONE	NONE	NONE	NONE	0	0	0	0	0	0	0	0	0	0	0		NONE	NONE
01-00-64-89	15 BID for 21 days then 20 mg daily	30	39	male	70	1.68	24.8016	NO	NKA	yes	25-3-2019	acute subclavian vein thrombosis	no			rivaroxaban	aspirin, 81 mg, Oral, Daily		24	22	96	36.58	10.37	62	139.373	NONE	NONE	NONE	NONE	NONE	0	0	0	0	0	0	0	0	0	0	0		NONE	NONE
01-04-37-76	10 mg daily	10	40	female	52.6	1.55	21.8939	NO	NKA	no			no			rivaroxaban	None	SLE, THR	17	38	48	26.76	4.9	49	131.202	NONE	NONE	NONE	NONE	NONE	0	0	0	0	0	0	0	0	0	0	0		NONE	NONE
10-02-66-66	10 mg daily	10	40	female	97	1.74	32.0386	NO	NKA	yes	42248	PE	no			rivaroxaban	None	PE, ACNE	43	32	91	35.28	6.32	54	219.547	NONE	فيه هنا	NONE	NONE	NONE	0	0	0	0	0	0	0	0	0	0	0		NONE	NONE
00-34-12-03	rivaroxaban 10 mg/ 1 tab(s) Oral Daily	10	40	M	132.5	1.86	38.2992	YES	NKA	NO	NONE	NONE	NONE	NONE	NONE	RIVA	NO	RIGHT SHOULDER DISLOCATION REPAIR,	34	30	98	38.62	18.43	89	181.96	NONE	NONE	NONE	NONE	NONE	0	0	0	0	0	0	0	0	0	0	0		NONE	NONE
00-70-53-06	rivaroxaban 10 mg/ 1 tab(s) Oral Daily	10	40	M	52	1.57	21.0962	YES	BRUFEN, LORNOXICAM, TRAMADOL, VOLTARIN	NO	NONE	NONE	NONE	NONE	NONE	RIVA	NO	SLE, ACUTE CHEST SYNDROME, EXTENSIVE THROMBOSIS LIVING IN SMALL CEREBRAL COLLATERALS, CHOLECYSTECTOMY	19	39	67	34.8	28.73	74	85.8859	NONE	NONE	NONE	NONE	NONE	0	0	0	0	0	0	0	0	0	0	0		NONE	NONE
10-24-65-28	15 mg daily	15	40	male	76	1.79	23.7196	NO	banana	no			no			rivaroxaban	None	AVR, IE , bicuspid aortic valve , rheumatic disease	54	26	128	37.24	6.88	89	104.37	NONE	NONE	NONE	NONE	NONE	0	0	0	0	0	1	0	0	0	0	0		NONE	NONE
10-14-44-90	15 mg oral daily	15	40	male	61.8	1.72	20.8897	NO	NKA	no			yes		a-fib	rivaroxiban	None	sever AS (subvalvular aortic membrane), sever MS (Supravalvular mitral membrane), AF	20	13	82	32.86	19.91	101	74.7855	NONE	NONE	NONE	NONE	NONE	0	0	0	0	0	0	0	0	0	0	0		NONE	NONE
10-05-32-69	20 mg daily	20	40	female	78	1.618	29.7946	NO	NKA	yes		DVT	no			rivaroxaban	None	AVR and TVR, DVT	33	17	112	39	11.34	62	153.763	NONE	NONE	NONE	NONE	NONE	0	0	0	0	0	0	0	0	0	1	1		NONE	NONE
10-20-98-61	20 mg daily	20	40	male	85	1.68	30.1162	NO	NKA	yes		left Cephalic vein thrombosis	no			rivaroxaban	None	DM, CHB on CRT-D device implanted as icd with VF therapy, Depressed Systemic ventricle function, PHTN, VTE	26	15	59	42.88	13.66	96	108.218	NONE	NONE	NONE	NONE	NONE	0	0	0	0	0	1	0	0	1	0	1		NONE	NONE
00-93-39-72	20 mg daily	20	40	male	83.6	1.77	26.6845	NO	NKA	yes	Jan 2017	DVT,PE	NO			Rivaroxaban	None		107	55	48	34.52	6.13	77	132.698	NONE	NONE	NONE	NONE	NONE	0	0	0	0	0	1	1	0	0	0	1		NONE	NONE
10-21-69-70	20 mg daily	20	40	male	95	1.95	24.9836	NO	NKA	no			yes			rivaroxaban	None	AF, NICMP with sever LVSD	46	20	60	36.23	19.34	85	136.601	NONE	NONE	NONE	NONE	NONE	0	0	0	0	0	0	0	0	0	1	0		NONE	NONE
10-22-04-09	20 mg daily	20	40	male	86.1	1.75	28.1143	ex heavy smoker	NKA	no			no			rivaroxaban	aspirin 81 mg	MVR, HTN, DLD, Alcoholism and drug abuser	24	15	91	31.01	5.32	61	172.514	NONE	NONE	NONE	NONE	NONE	0	0	0	0	0	1	1	0	0	0	0		NONE	NONE
10-00-62-20	20 mg daily	20	40	female	83.9	1.587	33.3126	NO	NKA	yes		DVT, PE	no			rivaroxaban	aspirin, 81 mg, Oral, Daily	DVT, PE, bilateral breast masses largest on the right side	11	11	68	30	5.12	53	193.48	NONE	NONE	NONE	NONE	NONE	0	0	0	0	0	1	0	0	0	0	0		NONE	NONE
10-01-58-49	20 mg daily	20	40	male	68.5	1.68	24.2701	NO	NKA	no			no			rivaroxaban	None	BA and drug addict, left subclavian artery occlusion, dorsum hand necrotic ulcer, pain	22	22	158	40	10.35	60	139.537	NONE	NONE	NONE	NONE	NONE	0	0	0	0	0	0	0	0	0	0	0		NONE	NONE
10-05-79-36	20 mg daily	20	40	female	66.7	1.5	29.6444	NO	Tegretol	yes		Cavernous sinu thrombosis	no			rivaroxaban	None	Bilateral lower pains, Cavernous sinu thrombosis	26	21	77	36.08	4.65	63	129.4	NONE	NONE	NONE	NONE	NONE	0	0	0	0	0	0	0	0	0	0	0		NONE	NONE
10-21-55-38	20 mg daily	20	40	female	73.5	1.63	27.6638	NO	NKA	yes		CVT	no			rivaroxaban	None	Extensive CVT from Superior sagittal till the LT jugular (In Najran) with secondary seizure	19	17	101	36.28	5.79	46	195.29	NONE	NONE	NONE	NONE	NONE	0	0	0	0	0	0	0	0	0	0	0		NONE	NONE
10-01-55-26	20 mg daily	20	40	male	50	1.7	17.301	NO	NKA	yes		DVT AND PE ,PROVOKED	no			rivaroxaban	None	DVT, PE, alteration of comfort related to right upper abdominal pain, Seizure, Breathing pattern impairment	29	19	75	32.02	6.57	97	63.0011	NONE	NONE	NONE	NONE	NONE	0	0	0	0	0	0	0	0	0	0	0		NONE	NONE
00-94-55-49	20 mg daily	20	40	male	110	1.83	32.8466	NO	NKA	yes		provoked PE	no			rivaroxaban	None	asthma, provoked PE	35	14	99	34	12	136	98.8562	NONE	0.91	NONE	NONE	NONE	0	0	0	0	0	0	0	0	0	0	0		NONE	NONE
10-20-18-04	20 mg daily	20	40	male	148	1.81	45.1757	yes	NKA	yes		DVT	no			rivaroxaban	None	knee pain, DVT, morbidly obese	60	0	0	33.1	10.97	81	223.32	NONE	3.72	NONE	NONE	NONE	0	0	0	0	0	0	0	0	0	0	0		NONE	NONE
01-19-57-21	20 mg daily	20	40	female	57	1.7	19.7232	Smoker 1 packet/day	STRAWBERRY,MANGO, VOLTERON	no			yes			rivaroxaban	None	Afib, ICD, IHD insertion, HOCM	17	8	36	35.71	9.77	68	102.451	NONE	NONE	NONE	NONE	NONE	0	0	0	0	0	0	0	0	0	0	0		NONE	NONE
00-88-35-58	20 mg oral tablet, 1 tab(s), Oral, qPM	20	40	female	78.3	1.68	27.7423	NO	NKA	yes	24-10-18		no			rivaroxaban	aspirin, 81 mg, Oral, Daily	no	11	11	96	27.07	4.14	44	217.5	NONE	NONE	NONE	NONE	NONE	0	0	0	1	0	0	0	0	0	0	0		NONE	NONE
00-90-76-64	20 mg TAB, 20 mg, 1 tab(s), Oral, qPM	20	40	male	81	1.79	25.2801	NO	NKA	no			no			rivaroxaban	aspirin, 81 mg, Oral, Daily	DM, HTN, hypothyrodism	35	14	99	34	12	79	125.316	NONE	NONE	NONE	NONE	NONE	0	0	0	0	0	1	1	0	0	0	1		NONE	NONE
00-38-73-85	rivaroxaban 20 mg/ 1 tab(s) Oral Daily	20	40	M	109.9	1.72	37.1485	NO	NKA	NO	NONE	NONE	NONE	NONE	NONE	RIVA	CLOP	HTN, BA, CKD, DCMP (DRUG ABUSER) WITH EF LESS THAN 25%, MODERATE RV DYSFUNCTION, ISCHEMIC STROKE, CKD, HTN	34	20	89	35.09	10.54	136	98.7663	NONE	NONE	NONE	NONE	NONE	0	0	0	0	0	1	1	0	0	1	0		NONE	NONE
00-33-13-51	rivaroxaban 20 mg/ 1 tab(s) Oral Daily	20	40	F	122	1.66	44.2735	NO	NKA	Yes	2013	DVT	NONE	NONE	NONE	RIVA	NO	RECURRENT DVT, 1ST ON 2013. SHE WAS ON ANTICOAGULANT (NOT RIVAROXABAN THE SHE HAS ANOTHER DVT 2017, THEN ANOTHER DVT ON THE SAME LEG IN THE SAME YEAR, THE 4TH DVT RIGHT LEG AFTER THAT THEY START RIVA AND DVT NOT COME BACK	21	14	67	40.45	4.07	64	232.986	NONE	NONE	NONE	NONE	NONE	0	0	0	0	0	0	0	0	0	0	0		NONE	NONE
00-74-33-99	rivaroxaban 20 mg/ 1 tab(s) Oral Daily	20	40	F	77.4	1.56	31.8047	NO	NKA	Yes	2019	DVT	NONE	NONE	NONE	RIVA	NO	HX OF DVT TWICE, FIRST 12 YEARSA BACK AND SHE WAS ON WARFARIN THEN IN 2019 SHE HAD ANOTHR DVT AND THEY START RIVAR	21	16	75	33.28	5.09	53	178.491	NONE	NONE	NONE	NONE	NONE	0	0	0	0	0	0	0	0	0	0	0		NONE	NONE
00-82-46-54	rivaroxaban 20 mg/ 1 tab(s) Oral Daily	20	40	F	70.8	1.62	26.9776	NO	NKA	Yes	2009	DVT	NONE	NONE	NONE	RIVA	NO	ADRENAL INSUFFECIENCY, BILATERAL ADRENAL ADENOMA , PROTEIN S DEFECIENCY, NSTEMI , OLD HISTORY OF DVT TWOCE IN 2009, 5 PREVIOUS MISCARRIAGE, ADDISONS DISEASE	38	19	95	32.67	6.74	71	121.878	NONE	NONE	NONE	NONE	NONE	0	0	0	0	0	0	0	0	0	0	0		NONE	NONE
00-21-51-34	rivaroxaban 20 mg/ 1 tab(s) Oral Daily	20	40	M	100	1.803	30.7616	NO	NKA	Yes	2013	DVT, PE	NONE	NONE	NONE	RIVA	NO	DVT, PE IN 2013, GERD, MAJOR DEPRESSION DISORDER	41	24	88	34.53	6.46	81	150.892	NONE	NONE	NONE	NONE	NONE	0	0	0	0	0	0	0	0	0	0	0		NONE	NONE
10-05-55-39	10 mg daily	10	41	female	66	1.65	24.2424	NO	NKA	yes		DVT	no			rivaroxaban	None	DVT	17	10	44	38.52	11.18	64	124.781	NONE	NONE	NONE	NONE	NONE	0	0	0	0	0	1	1	0	0	0	1		NONE	NONE
00-96-69-78	10 mg daily	10	41	male	58	1.63	21.83	NO	NKA	yes		recurrent DVT	no			rivaroxaban	None	DLP, DVTs	41	25	86	39.27	15.69	87	80.6667	NONE	NONE	NONE	NONE	NONE	0	0	0	0	0	0	0	0	0	0	0		NONE	NONE
10-15-69-47	10 mg oral daily	10	41	female	63	1.57	25.5588	NO	NKA	no			no			rivaroxiban	None	HTN,HFpEF,pancreatic neuroendocrine with liver metastasis,S/P Whipple's in 2013 was on evorulimus then octerotide,S/P brain tumor resection in 2015,	14	20	114	28.75	4.2	118	64.6017	NONE	NONE	NONE	NONE	NONE	0	0	0	0	0	1	0	0	0	1	0		NONE	NONE
00-48-50-74	rivaroxaban 10 mg/ 1 tab(s) Oral Daily	10	41	F	104	1.56	42.735	NO	NKA	NO	NONE	NONE	NONE	NONE	NONE	RIVA	NO	CEREBRAL THROMBOSIS, PROTEIN S DEFECIENCY, STROKE	21	17	59	36.59	11.16	56	224.714	NONE	NONE	NONE	NONE	NONE	0	0	0	0	0	0	0	0	0	0	0		NONE	NONE
00-49-50-89	rivaroxaban 10 mg/ 1 tab(s) Oral Daily	10	41	M	78.3	1.72	26.467	NO	NKA	NO	NONE	NONE	NONE	NONE	NONE	RIVA	NO	EWING SACROMA CAME TO CLINIC COMPLAINING OF SHOULD PAIN AND SWELLING	35	14	99	34	12	85	111.462	NONE	NONE	NONE	NONE	NONE	0	0	0	0	0	0	0	0	0	0	0		NONE	NONE
10-22-49-56	15 mg daily	15	41	male	84	1.74	27.7447	yes	NKA	yes		LAD thrombus, LV thrombus	no			rivaroxaban	aspirin 81 mg	sever LV dysfunction with LV thrombus, NSTEMI, left MCA stroke, socially drinker and amphetamine abuser	79	33	104	30.89	7.31	54	188.222	NONE	NONE	NONE	NONE	NONE	0	0	0	0	0	0	0	0	0	1	0		NONE	NONE
10-05-78-46	15 mg daily	15	41	male	76	1.79	23.7196	NO	NKA	no			no			rivaroxaban	aspirin, 81 mg, Oral, Daily	acute right lower limb ischemia, insomnia and confusion	25	16	61	34.3	6.18	71	129.521	NONE	NONE	NONE	NONE	NONE	0	0	0	0	0	0	0	1	0	0	0		NONE	NONE
01-05-52-81	20 mg daily	20	41	female	60	1.665	21.6433	NO	NKA	yes		DVT, PE	no			rivaroxaban	None	acute pain, Alteration in comfort, DVT, PE	24	23	62	36	8.19	56	129.643	NONE	NONE	NONE	NONE	NONE	0	0	0	0	0	0	0	1	0	0	0		NONE	NONE
10-22-46-81	20 mg daily	20	41	male	86.4	1.81	26.3728	NO	NKA	no			no			rivaroxaban	aspirin 81 mg	stroke, HTN,	31	15	72	34.98	7.05	114	91.7053	NONE	0.27	NONE	NONE	NONE	0	0	0	0	0	1	0	0	0	0	0		NONE	NONE
10-02-38-59	20 mg daily	20	41	female	113	1.59	44.6976	NO	NKA	yes		PE, DVT	no			rivaroxaban	None	HTN, DVT, PE	33	18	79	31	6.16	40	341.825	NONE	NONE	NONE	NONE	NONE	0	0	0	0	0	1	0	0	0	0	0		NONE	NONE
10-11-23-68	20 mg daily	20	41	male	100	1.68	35.4308	no	NKA	no			yes			rivaroxaban	None	DM, HTN, DLD, IHD, Afib,	24	9	102	35.56	20.17	81	149.383	NONE	NONE	NONE	NONE	NONE	0	0	0	0	0	1	0	0	0	0	0		NONE	NONE
10-23-66-32	20 mg daily	20	41	male	85	1.61	32.7919	NO	NKA	yes		LV thrombus	no			rivaroxaban	aspirin 81 mg, plavix 75 mg daily	IHD, LV thrombus	36	16	58	33.62	5.26	80	128.562	NONE	NONE	NONE	NONE	NONE	0	0	0	0	0	0	0	0	0	0	0		NONE	NONE
00-86-56-47	20 mg daily	20	41	male	58	1.67	20.7967	NO	glutens	yes		mesntric ischmia and bowel resction surgery	no			rivaroxaban	None	celiac disease	19	11	62	33	14.63	110	63.8	NONE	NONE	NONE	NONE	NONE	0	0	0	0	0	0	0	0	0	0	0		NONE	NONE
01-04-93-67	20 mg daily	20	41	male	104	1.7	35.9862	NO	NKA	no			no			rivaroxaban	None		40	19	65	38.91	5.29	104	121	NONE	NONE	NONE	NONE	NONE	0	0	0	0	0	0	0	0	0	0	0		NONE	NONE
00-99-95-88	20 mg daily	20	41	female	95	1.58	38.0548	NO	NKA	yes		PE post partum	no			rivaroxaban	None		13	12	83	35.18	5.48	50	229.9	NONE	NONE	NONE	NONE	NONE	0	0	0	0	0	0	0	0	0	0	0		NONE	NONE
10-05-15-44	20 mg daily	20	41	female	73	1.57	29.6158	NO	NKA	yes	42401	EXTENSIVE BILATERAL DVT	no			rivaroxaban	None	DVT	27	16	107	35.27	8.34	64	138.016	NONE	NONE	NONE	NONE	NONE	0	0	0	0	0	0	0	0	0	0	0		NONE	NONE
10-06-30-17	20 mg daily	20	41	female	80.2	1.68	28.4155	NO	NKA	yes		Bilateral SUB-SEGMENTAL PE	no			rivaroxaban	None	PHTN, PE, sensorineural deafness	35	17	116	41.35	19.77	74	131.138	NONE	NONE	NONE	NONE	NONE	0	0	0	0	0	0	0	0	0	0	0		NONE	NONE
01-06-08-23	20 mg daily	20	41	male	103	1.77	32.8769	NO	NKA	yes		DVT	no			rivaroxaban	None	HTN, DM, DLP, obesity, DVT	47	22	105	36.07	4.08	75	166.173	NONE	NONE	NONE	NONE	NONE	0	0	0	0	0	0	0	0	0	0	0		NONE	NONE
10-19-94-77	20 mg daily	20	41	female	65	1.58	26.0375	NO	NKA	yes		DVT	yes			rivaroxaban	None	Rheumatic heart diseases, Afib, severe TR and Sever MR, Mitral valve replacement and tricuspid valve repair	19	25	113	37.68	7.98	120	65.5417	NONE	NONE	NONE	NONE	NONE	0	0	0	0	0	0	0	0	0	0	0		NONE	NONE
10-14-42-41	20 mg oral daily	20	41	male	76	1.6	29.6875	yes	NKA	no			yes		a-fib	rivaroxiban	aspirin 81 mg	liver failure,	1266	827	208	26	119.57	212	43.3774	NONE	NONE	NONE	NONE	NONE	0	0	0	0	0	1	0	0	0	0	1		NONE	NONE
00-54-41-12	rivaroxaban 20 mg/ 1 tab(s) Oral Daily	20	41	M	114	1.84	33.672	NO	NKA	Yes	2015	DVT	NONE	NONE	NONE	RIVA	NO	DVT IN 2015, DM , PATIETN NW ON ASA NOT ON RIVA	35	14	99	34	12	85	162.282	NONE	NONE	NONE	NONE	NONE	0	0	0	0	0	0	0	0	0	0	1		NONE	NONE
00-82-33-87	rivaroxaban 20 mg/ 1 tab(s) Oral Daily	20	41	M	69.9	1.71	23.9048	YES	NKA	NO	NONE	NONE	NONE	NONE	NONE	RIVA	ASA	DLD, IHD, HYPERCOAGULABLE DISORDER ON RIVAROX, HFREF,CAD	27	13	115	32.5	10.48	84	100.689	NONE	NONE	NONE	NONE	NONE	0	0	0	0	0	1	0	0	0	1	0		NONE	NONE
00-03-00-88	rivaroxaban 20 mg/ 1 tab(s) Oral Daily	20	41	F	66	1.56	27.1203	NO	PENICILLIN	NO	NONE	NONE	NONE	NONE	NONE	RIVA	ASA	SEIZURE, MIGRAINE, STROKE, APS, TIA	35	14	99	34	12	85	93.9529	NONE	NONE	NONE	NONE	NONE	0	0	0	0	0	0	0	0	0	0	0		NONE	NONE
01-02-89-85	10 mg daily	10	42	female	56.6	1.58	22.6726	NO	NKA	no			no			rivaroxaban	None	foot pain	19	9	41	38.7	9.83	53	127.914	NONE	NONE	NONE	NONE	NONE	0	0	0	0	0	1	1	0	0	0	1		NONE	NONE
10-04-16-74	10 mg daily	10	42	male	107	1.85	31.2637	NO	NKA	yes		portal vein thrombosis	no			rivaroxaban	None	DVT	39	32	54	32	8.3	80	160.203	NONE	3.54	NONE	NONE	NONE	0	0	0	0	0	0	0	0	0	0	1		NONE	NONE
10-24-69-54	10 mg daily	10	42	female	69	1.58	27.6398	NO	NKA	no			no			rivaroxaban	None	Motor vehicle accident	35	14	99	34	12	85	97.2314	NONE	NONE	NONE	NONE	NONE	0	0	0	0	0	1	0	0	0	0	0		NONE	NONE
00-32-66-71	rivaroxaban 10 mg/ 1 tab(s) Oral Daily	10	42	F	89	1.47	41.1865	NO	NKA	Yes	2018	MASSIVE PE	NONE	NONE	NONE	RIVA	ASA	DM, DLD, HTN, MASSIVE PE REQUIRING TPA AND ICU ADMISSION ON 2018, PERSISTANT LEUKOCYTOSIS,	16	8	72	37.12	3.2	54	197.412	NONE	NONE	NONE	NONE	NONE	0	0	0	0	0	0	1	0	0	0	1		NONE	NONE
00-28-61-77	rivaroxaban 10 mg/ 1 tab(s) Oral Daily	10	42	F	90.5	1.64	33.6481	NO	NKA	Yes	2018	DVT, PE	NONE	NONE	NONE	RIVA	NO	PE, LLDVT, MAY THURNER SYNDROME, HYPOTHROIDISM	25	14	63	36	5.53	56	193.569	NONE	NONE	NONE	NONE	NONE	0	0	0	0	0	0	0	1	0	0	0		NONE	NONE
00-03-10-91	rivaroxaban 10 mg/ 1 tab(s) Oral Daily	10	42	F	68.4	1.55	28.4703	NO	NKA	Yes	43525	CAVERNOUS SINUS THROMBOSIS	NONE	NONE	NONE	RIVA	NO	SINUS VENOUS THROMBOSIS, UNPROVOKED ,	20	17	88	36.24	7.7	64	128.013	NONE	NONE	NONE	NONE	NONE	0	0	0	0	0	0	0	0	0	0	0		NONE	NONE
00-46-80-95	rivaroxaban 10 mg/ 1 tab(s) Oral Daily	10	42	F	69.8	1.637	26.047	NO	NKA	Yes	?	PORTAL VEIN THROMBOSIS	NONE	NONE	NONE	RIVA	NO	ANTIPHOSPHOLIPID SYNDROM, POERTAL VEIN THROMBOSIS	20	10	60	39.42	14.73	48	174.177	NONE	NONE	NONE	NONE	NONE	0	0	0	0	0	0	0	0	0	0	0		NONE	NONE
00-50-54-31	rivaroxaban 10 mg/ 1 tab(s) Oral Daily	10	42	M	75	1.73	25.0593	NO	NKA	Yes	?	DVT	NONE	NONE	NONE	RIVA	NO	BAHCET'S DISEASE, BILATERAL DVT	46	18	69	41.32	7.17	78	115.171	NONE	NONE	NONE	NONE	NONE	0	0	0	0	0	0	0	0	0	0	0		NONE	NONE
10-05-14-93	15 mg daily	15	42	male	89	1.85	26.0044	no	NKA	no			no			rivaroxaban	aspirin, 81 mg, Oral, Daily	HF, polycythemia	143	85	179	43.57	38.55	86	123.956	NONE	NONE	NONE	NONE	NONE	0	0	0	0	0	0	0	0	0	0	1		NONE	NONE
10-22-94-99	15 mg daily	15	42	male	73	1.73	24.3911	NO	NKA	no			no			rivaroxaban	None	Aortic stenosis and regurgitation	18	20	108	31.56	3.99	89	98.2447	NONE	NONE	NONE	NONE	NONE	0	0	0	0	0	0	0	0	0	0	0		NONE	NONE
00-59-72-71	rivaroxaban 15 mg / 1 tab(s) Oral Daily	15	42	F	90.3	1.527	38.7266	NO	NKA	NO	NONE	NONE	NONE	NONE	NONE	RIVA	NO	UNPROVOKED DVT 20 YEARS AGO, POST GASTRIC SLLEVE,	11	14	92	36.88	6.78	51	212.077	NONE	NONE	NONE	NONE	NONE	0	0	0	0	0	0	0	0	0	0	0		NONE	NONE
00-82-91-25	rivaroxaban 15 mg/ 1 tab(s) Oral Daily	15	42	F	87	1.65	31.9559	NO	NKA	NO	NONE	NONE	NONE	NONE	NONE	RIVA	ASA	SURGICAL ASD CLOSURE	64	26	131	34.3	8.4	67	155.532	NONE	NONE	NONE	NONE	NONE	0	0	0	0	0	0	0	0	0	0	0		NONE	NONE
10-06-55-69	20 mg daily	20	42	male	80	1.6	31.25	NO	NKA	no			no			rivaroxaban	None	IHD	35	14	99	34	12	85	112.732	NONE	NONE	NONE	NONE	NONE	0	0	0	0	0	0	0	0	0	1	1		NONE	NONE
02-36-68-08	20 mg daily	20	42	female	117	1.66	42.459	NO	NKA	yes	42980	Bilateral PE	no			rivaroxaban	aspirin, 81 mg, Oral, Daily	DLD, DM, Left common iliac vein, and Bilateral PE,obesity	16	10	49	35.27	5.54	45	311.422	NONE	0.42	NONE	NONE	NONE	0	0	0	0	0	1	0	0	0	0	1		NONE	NONE
10-10-66-42	20 mg daily	20	42	male	96	1.66	34.8381	NO	NKA	no			no			rivaroxaban	None	IHD, CABG, DM, HTN, Peripheral vascular disease s/p femoral pybass	37	17	69	0	5.42	103	111.638	NONE	NONE	NONE	NONE	NONE	0	0	0	0	0	1	0	0	0	0	1		NONE	NONE
01-13-20-83	20 mg daily	20	42	female	60	1.58	24.0346	no	NKA	yes		right cervical vein thrombos	no			rivaroxaban	None	breast cancer	18	14	59	36.07	3.41	62	115.914	NONE	NONE	NONE	NONE	NONE	0	0	0	0	0	1	0	0	0	0	1		NONE	NONE
02-26-54-37	20 mg daily	20	42	female	68	1.565	27.7639	NO	NKA	yes		DVT, PE	no			rivaroxaban	None	DVT, PE,	31	14	129	39.91	6.29	58	140.429	NONE	NONE	NONE	NONE	NONE	0	0	0	0	0	0	0	0	0	0	0		NONE	NONE
10-17-64-15	20 mg daily	20	42	male	118.8	1.82	35.8652	NO	NKA	yes	2019	DVT	no			rivaroxaban	None	DVT	40	36	88	34.07	24.74	55	258.72	NONE	NONE	NONE	NONE	NONE	0	0	0	0	0	0	0	0	0	0	0		NONE	NONE
10-04-63-96	20 mg daily	20	42	female	80	1.6	31.25	NO	NKA	no			yes		PAF	rivaroxaban	None	DLD, HTN, DM, Gout GERD, Afib	35	14	99	34	12	85	112.732	NONE	NONE	NONE	NONE	NONE	0	0	0	0	0	0	0	0	0	0	0		NONE	NONE
00-79-01-50	rivaroxaban 20 mg/ 1 tab(s) Oral Daily	20	42	F	63.8	1.52	27.6143	NO	NKA	NO	NONE	NONE	NONE	NONE	NONE	RIVA	NO	DVT AND PE AFTER GASTRIC SLEEVE	36	21	39	35.77	7.22	61	125.276	NONE	NONE	NONE	NONE	NONE	0	0	0	0	0	0	0	0	0	0	0		NONE	NONE
00-21-24-56	rivaroxaban 20 mg/ 1 tab(s) Oral Daily	20	42	F	118	1.6	46.0937	NO	NKA	Yes	?	PE	NONE	NONE	NONE	RIVA	NO	PE, STROKE, DEPRESSION	14	15	91	26.3	6.44	48	294.454	NONE	NONE	NONE	NONE	NONE	0	0	0	0	0	0	0	0	0	0	0		NONE	NONE
00-38-58-01	rivaroxaban 15 mg BID FOR 21 DAYS THEN 20MG Daily	30	42	F	78	1.565	31.8468	NO	NKA	Yes	?	DVT	NONE	NONE	NONE	RIVA	NO	PROVOKED DVT, BREAST CA.	35	14	99	34	12	85	109.914	NONE	NONE	NONE	NONE	NONE	0	0	0	0	0	0	0	0	0	0	0		NONE	NONE
00-46-36-15	rivaroxaban 15mg tablet oral BID	30	42	F	68	1.62	25.9107	NO	NKA	NO	NONE	NONE	None	None	None	Rivaroxaban	None	diagnosis: Acute PE, no comorbidities	19	14	99	34.3	7.07	52	156.632	None	0.66	None	None	None	0	0	0	0	0	1	1	0	0	1	1		NONE	NONE
10-01-49-88	10 mg daily	10	43	male	63.8	1.68	22.6049	yes	NKA	yes		PE	no			rivaroxaban	None	lung mass, PE	25	24	161	26	10.1	103	73.4354	NONE	NONE	NONE	NONE	NONE	0	0	0	0	0	1	0	0	0	0	1		NONE	NONE
10-10-21-42	10 mg daily	10	43	female	79.9	1.56	32.832	NO	NKA	yes	2016	Superior sagittal sinus thrombosis	no			rivaroxaban	None	sagittal sinus thrombosis, IDA, Microcytosis	12	7	154	27.52	8.14	42	225.538	NONE	NONE	NONE	NONE	NONE	0	0	0	0	0	1	0	0	0	0	0		NONE	NONE
00-85-33-98	10 mg oral daily for 25 days	10	43	female	96.3	1.657	35.0737	NO	NKA	yes			no			rivaroxaban, enoxaparin	None		35	14	99	34	12	85	134.316	NONE	NONE	NONE	NONE	NONE	0	0	0	0	0	0	0	0	0	0	0		NONE	NONE
00-54-26-01	rivaroxaban 10 mg/ 1 tab(s) Oral Daily	10	43	F	81.5	1.676	29.0141	NO	NKA	Yes	2016 POST PARTUM	LL DVT	NONE	NONE	NONE	RIVA	NO	HYPOTHYROI, SLE, BILATERAL DISTAL DVT	36	19	99	39.95	10.88	57	169.514	NONE	NONE	NONE	NONE	NONE	0	0	0	0	0	0	0	1	0	0	0		NONE	NONE
10-12-84-12	15 mg oral daily	15	43	female	61	1.62	23.2434	NO	NKA	no			no			rivaroxiban	None	Extensive dural venous sinus thrombosis ,cardiomyopathy	30	22	87	36.09	5.57	70	103.313	NONE	NONE	NONE	NONE	NONE	0	0	0	0	0	1	0	0	0	0	1		NONE	NONE
00-88-30-24	15 mg, Oral, qPM	15	43	male	85	1.89	23.7955	NO	NKA	yes		UL and LL DVT	no			rivaroxaban	None	CKD	21	17	124	34.8	17.49	134	75.2032	NONE	NONE	NONE	NONE	NONE	0	0	0	0	0	1	1	1	0	0	0		NONE	NONE
10-21-89-85	20 mg daily	20	43	female	57.9	1.48	26.4335	NO	NKA	no			yes		PAF	rivaroxaban	aspirin 81 mg	DLD, HTN, DM, Afib	23	9	83	31.34	11.47	53	129.516	NONE	NONE	NONE	NONE	NONE	0	0	0	0	0	1	1	0	0	0	1		NONE	NONE
10-10-44-96	20 mg daily	20	43	female	121.4	1.7	42.0069	NO	NKA	no			no			rivaroxaban	None	HTN, DM, hyperthyrodism, PHEOCHROMOCYTOMA	11	13	82	30	5.29	42	342.682	NONE	NONE	NONE	NONE	NONE	0	0	0	0	0	1	0	0	0	0	1		NONE	NONE
10-21-49-52	20 mg daily	20	43	male	63.2	1.63	23.7871	no	NKA	no			yes			rivaroxaban	None	HFrEF, ECG shows Q wave over the anterior leads with Deep symmetrical T wave inversions	45	16	168	34.36	9.48	74	101.253	NONE	NONE	NONE	NONE	NONE	0	0	0	0	0	0	0	0	0	1	0		NONE	NONE
01-10-43-36	20 mg daily	20	43	female	117	1.58	46.8675	no	BRUFEN,voltarin,olfen,xefo	yes	2017	PE	no			rivaroxaban	None	DM, HTN, DLD, Iatrogenic Cushing Syndrome, PE	35	14	99	34	12	85	163.188	NONE	NONE	NONE	NONE	NONE	0	0	0	0	0	1	1	0	0	0	0		NONE	NONE
01-13-22-79	20 mg daily	20	43	female	100.1	1.65	36.7677	no	NKA	yes	42064	LEFT DVT	no			rivaroxaban	None	DVT	24	16	56	38	14.53	54	219.767	NONE	0.33	NONE	NONE	NONE	0	0	0	0	0	1	0	0	0	0	0		NONE	NONE
01-15-62-62	20 mg daily	20	43	male	80	1.6	31.25	NO	NKA	no			None			rivaroxiban	None		26	16	86	42.2	5.16	115	82.4734	NONE	NONE	NONE	NONE	NONE	0	0	0	0	0	1	0	0	0	0	0		NONE	NONE
01-20-18-62	20 mg daily	20	43	female	67	1.695	23.3204	NO	NKA	yes		LL DVT 2RY TO PELVIC BENIGEN MASS	no			rivaroxaban	aspirin, 81 mg, Oral, Daily	DVT	11	12	65	36	3.9	59	134.631	NONE	0.27	NONE	NONE	NONE	0	0	0	0	0	0	0	0	0	0	0		NONE	NONE
10-11-03-19	20 mg daily	20	43	male	154	1.66	55.8862	NO	NKA	no			no			rivaroxaban	None	AkI, cardiomyopathy, HTN, Right leg swelling	43	22	77	24	6.96	121	150.889	NONE	NONE	NONE	NONE	NONE	0	0	0	0	0	0	0	0	0	0	0		NONE	NONE
01-10-81-47	20 mg daily	20	43	female	99	1.61	38.193	NO	NKA	yes		DVT	no			rivaroxaban	None	HTN, DLD, DM, hypothyrodism	22	11	74	30.22	6.23	45	260.822	NONE	NONE	NONE	NONE	NONE	0	0	0	0	0	0	0	0	0	0	0		NONE	NONE
10-01-52-98	20 mg daily	20	43	female	91.2	1.62	34.7508	NO	NKA	yes		DVT unprovoked	no			rivaroxaban	None	DVT	35	14	99	34	12	72	150.17	NONE	NONE	NONE	NONE	NONE	0	0	0	0	0	0	0	0	0	0	0		NONE	NONE
02-53-00-32	20 mg daily	20	43	male	120	1.87	34.3161	NO	NKA	yes		DVT	no			rivaroxaban	None	LBP, DVT	35	14	99	34	12	85	167.373	NONE	NONE	NONE	NONE	NONE	0	0	0	0	0	0	0	0	0	0	0		NONE	NONE
10-06-76-11	20 mg daily	20	43	female	75	1.6	29.2969	NO	NKA	yes		DVT	yes			rivaroxaban	None	DVT, Afib	16	13	80	36.08	6.27	61	145.765	NONE	NONE	NONE	NONE	NONE	0	0	0	0	0	0	0	0	0	0	0		NONE	NONE
10-15-61-55	20 mg oral daily	20	43	female	75	1.53	32.039	NO	NKA	yes		DVT	NO			rivaroxiban	None	DVT	15	15	56	36.24	3.61	76	116.996	NONE	NONE	NONE	NONE	NONE	0	0	0	0	0	0	0	0	0	0	0		NONE	NONE
00-91-66-30	20 mg oral tablet, 20 mg, Oral, qPM	20	43	male	64.7	1.69	22.6533	NO	NKA	no			no			rivaroxaban	None	epilepsy, MVA	14	17	46	32.58	9.1	70	109.579	NONE	NONE	NONE	NONE	NONE	0	0	0	0	0	0	0	0	0	0	0		NONE	NONE
00-39-84-54	rivaroxaban 20 mg/ 1 tab(s) Oral Daily	20	43	F	67	1.63	25.2174	NO	NKA	Yes	2019	DVT	NONE	NONE	NONE	RIVA	NO	LL DVT ON ENOXA ,	13	13	59	32.84	13.05	68	116.812	NONE	NONE	NONE	NONE	NONE	0	0	0	0	0	0	0	0	0	0	0		NONE	NONE
00-43-39-22	rivaroxaban 20 mg/ 1 tab(s) Oral Daily	20	43	F	109.2	1.58	43.743	NO	NKA	Yes	RECURRENT	DVT, PE	NONE	NONE	NONE	RIVA	NO	PROTHROMBIN MUTATION, HX OF PREVIOUS PE, AND RECURRENT DVT POST DELIVERY, 3 EPISODES PRECEEDING CESAREAN SECTION	35	14	99	34	12	85	152.309	NONE	NONE	NONE	NONE	NONE	0	0	0	0	0	0	0	0	0	0	0		NONE	NONE
00-79-24-65	rivaroxaban 20 mg/ 1 tab(s) Oral Daily	20	43	F	86.5	1.5	38.4444	NO	NKA	Yes	14 YEARS BACK	DVT, PE	NONE	NONE	NONE	RIVA	NO	PROVOKED DVT, PE AND IRON DEFECIENCY ANEMIA PATIENT USING ENOZAPARIN, DID NOT USE RIVA	51	37	287	36.3	4.97	58	176.811	NONE	NONE	NONE	NONE	NONE	0	0	0	0	0	0	0	0	0	0	0		NONE	NONE
10-10-96-25	10 mg daily	10	44	female	79	1.61	30.4772	NO	NKA	no			no			rivaroxaban	None	post lt ankle Achilles tendon rupture	15.5	11.5	39	48.9	9.2	48	193.111	NONE	NONE	NONE	NONE	NONE	0	0	0	0	0	1	1	0	0	1	1		NONE	NONE
10-10-82-59	10 mg daily	10	44	male	98	1.745	32.1836	NO	NKA	no			no			rivaroxaban	None	WITH LT FOOT PAIN, CYSTIC CHANGE IN THE LT FOOT	27	9	77	38.81	6.32	63	182.519	NONE	NONE	NONE	NONE	NONE	0	0	0	0	0	1	0	0	0	0	1		NONE	NONE
10-05-02-62	10 mg daily	10	44	male	77.3	1.68	27.388	NO	NKA	no			no			rivaroxaban	None	HTN, Hep B, Post RTA	24	12	82	35	9.71	69	131.447	NONE	NONE	NONE	NONE	NONE	0	0	0	0	0	0	0	0	0	0	1		NONE	NONE
00-92-86-27	10 mg daily	10	44	male	110.1	1.75	35.951	NO	NKA	no			no			rivaroxaban	None	KNEE TWISTING INJURY	53	25	43	39.43	8.54	68	189.976	NONE	NONE	NONE	NONE	NONE	0	0	0	0	0	0	1	0	0	0	0		NONE	NONE
10-16-64-37	10 mg daily	10	44	female	68	1.6	26.5625	NO	NKA	no			no			rivaroxiban	None	polytrauma mainly to her left distal femur and right ankle/foot	14	12	110	27.97	3.56	54	147.753	NONE	NONE	NONE	NONE	NONE	0	0	0	0	0	0	0	0	0	0	0		NONE	NONE
10-15-91-19	10 mg oral daily	10	44	female	79.8	1.6	31.1719	NO	NKA	yes		DVT	no			rivaroxiban	None	DVT,Uterine Fibroid	15	11	57	33.73	4.81	45	208.071	NONE	NONE	NONE	NONE	NONE	0	0	0	0	0	0	0	0	0	0	0		NONE	NONE
00-34-68-55	rivaroxaban 10 mg/ 1 tab(s) Oral Daily	10	44	M	95	1.8	29.321	YES	NKA	NO	NONE	NONE	NONE	NONE	NONE	RIVA	ASA	ESSEDNTIAL THROMBOCYTHEMIA, MURAL THROMBUS IN INFRA RENAL PART OF AORTA,	51	24	90	39.83	26.09	80	139.333	NONE	NONE	NONE	NONE	NONE	0	0	0	0	0	0	0	0	0	0	0		NONE	NONE
01-13-76-99	15 mg daily	15	44	male	87.4	1.78	27.5849	no	NKA	yes		DVT	no			rivaroxaban	None	DM, HTN, Psoriasis, DVT	38	12	148	36.58	3.84	110	93.2267	NONE	NONE	NONE	NONE	NONE	0	0	0	0	0	0	0	0	0	0	0		NONE	NONE
02-03-78-28	20 mg daily	20	44	male	87.9	1.89	24.6074	no	NKA	yes		LV thrombus	no			rivaroxaban	aspirin, 81 mg, Oral, Daily	HF, IHD, DM, LV thrombus	30	17	76	41.88	12.07	91	113.336	NONE	NONE	NONE	NONE	NONE	0	0	0	0	0	1	0	0	1	0	1		NONE	NONE
10-22-42-19	20 mg daily	20	44	male	65	1.61	25.0762	yes	NKA	no			yes		slow AF	rivaroxaban	None	Afib, DM, TIA, ASD VSD closure	79	51	92	31.57	10.15	57	133.801	NONE	NONE	NONE	NONE	NONE	0	0	0	0	0	0	0	0	0	0	1		NONE	NONE
10-24-60-04	20 mg daily	20	44	male	80	1.6	31.25	NO	NKA	yes		PE	no			rivaroxaban	None	PE	21	13	93	37.48	6.99	85	110.431	NONE	NONE	NONE	NONE	NONE	0	0	0	1	0	0	0	0	0	0	0		NONE	NONE
10-18-31-66	20 mg daily	20	44	male	79	1.77	25.2163	NO	NKA	no			yes	jan 2018		rivaroxaban	None	AF, HOCM post Alcohol ablation	68	24	60	30.7	16.7	73	126.977	NONE	NONE	NONE	NONE	NONE	0	0	0	0	0	0	0	0	0	0	0		NONE	NONE
00-66-89-63	rivaroxaban 20 mg/ 1 tab(s) Oral Daily	20	44	F	68.5	1.55	28.512	NO	NKA	NO	NONE	NONE	NONE	NONE	NONE	RIVA	NO	APS, IDA, HYPOTHYROIDISM, URTICARIA	31	16	43	36.91	8.53	46	174.725	NONE	NONE	NONE	NONE	NONE	0	0	0	0	0	0	0	1	0	0	0		NONE	NONE
00-29-52-57		20	44	F	96	1.57	38.9468	NO	NKA	NO	NONE	NONE	NONE	NONE	NONE	RIVA	NO	SLEEVE GASTERECTOMY, CT SHOWED NO PE, HOLD RIVA	37	28	61	30.56	5.57	50	225.28	NONE	NONE	NONE	NONE	NONE	0	0	0	0	0	0	0	0	0	0	0		NONE	NONE
00-05-25-11	rivaroxaban15MG BID FOR 21 DAYS	30	44	M	79	1.67	28.3266	NO	NKA	NO	NONE	NONE	NONE	NONE	NONE	RIVA	NO	ANKLE FIXATION, MENTAL IMPAIRMENT, EPILEPSY,	35	14	99	34	12	85	109.051	NONE	NONE	NONE	NONE	NONE	0	0	0	0	0	0	0	0	0	0	0		NONE	NONE
01-11-39-58	10 mg daily	10	45	female	80.6	1.62	30.7118	NO	NKA	yes		arterial thrombosis	no			rivaroxaban	ASA, 81 mg, Oral, Daily	breast Ca, arterial thrombosis, anxiet	75	537	228	13.99	337.14	85	110.101	NONE	NONE	NONE	NONE	NONE	0	0	0	0	0	0	0	0	0	0	1		NONE	NONE
00-45-83-32	rivaroxaban 10 mg/ 1 tab(s) Oral Daily	10	45	F	80	1.6	31.25	NO	NKA	Yes	RECURRENT	DVT, PE	NONE	NONE	NONE	RIVA	NO	MS, BED RIDDEN, RECURRENT DVT, PE	35	14	99	34	12	85	109.281	NONE	NONE	NONE	NONE	NONE	0	0	0	0	0	0	0	0	0	0	0		NONE	NONE
10-04-60-79	15 mg daily	15	45	male	89	1.71	30.4367	NO	NKA	yes		DVT Rt LL Extensive	no			rivaroxaban	None	DVT	58	35	113	37.09	14.09	84	123.022	NONE	NONE	NONE	NONE	NONE	0	0	0	0	0	1	0	0	0	0	0		NONE	NONE
01-12-49-59	15 mg daily	15	45	male	60.3	1.59	23.8519	no	NKA	no			yes			rivaroxaban	clopidogrel 75 mg daily	DM, HTN, Drug-induced hypotension	256	26	182	29.3	17.04	149	46.9899	NONE	NONE	NONE	NONE	NONE	0	0	0	0	0	0	0	0	0	0	0		NONE	NONE
10-11-02-30	15 mg daily	15	45	male	63	1.7	21.7993	NO	NKA	no			yes			rivaroxaban	None	Afib, dilated cardiomyopathy, PULMONARY TB	28	208	51	23.64	74.87	176	41.5625	NONE	NONE	NONE	NONE	NONE	0	0	0	0	0	0	0	0	0	0	0		NONE	NONE
10-11-97-22	15 mg oral daily	15	45	female	115	1.66	41.7332	NO	NKA	yes		DVT	no			rivaroxiban,warfarin	aspirin 81 mg	DM,OBEESE	22	35	68	33.4	6.06	63	211.949	NONE	NONE	NONE	NONE	NONE	0	0	0	0	0	1	0	0	0	1	1		NONE	NONE
00-48-16-31	rivaroxaban 15 mg / 1 tab(s) Oral BID THEN 20 MG OD	15	45	F	82.1	1.675	29.2626	NO	NKA	NO	NONE	NONE	NONE	NONE	NONE	RIVA	ASA	HYPOTHYROIDISM, HX OF PROVOKED DVT IN 2015 AND TREATED WITH RIVA FOR 6 MONTH THEN STOP IT, KEPT ON ASA AS PROPHYLAXIS	23	14	61	40.95	15.93	49	194.545	NONE	NONE	NONE	NONE	NONE	0	0	0	0	0	0	0	1	0	0	0		NONE	NONE
00-85-99-54	20 mg, Oral, Daily	20	45	female	71	1.53	30.3302	NO	NKA	yes	42153	acute DVT	no			rivaroxaban	None		27	0	0	38.1	5.44	67	123.043	NONE	NONE	NONE	NONE	NONE	0	0	0	0	0	1	0	0	0	0	0		NONE	NONE
01-06-73-22	20 mg daily	20	45	female	96.5	1.71	33.0016	NO	NKA	yes		reurrent DVTs	no			rivaroxaban	None	hypothyrodism, DM, HTN, DLP	26	18	76	35.8	6.55	70	160.067	NONE	NONE	NONE	NONE	NONE	0	0	0	0	0	0	0	0	0	0	0		NONE	NONE
10-22-13-30	20 mg daily	20	45	male	74.5	1.76	24.0509	NO	NKA	no			yes			rivaroxaban	None	MVR, MR, Tvrep, Afib	50	31	128	38.37	6.38	97	89.1781	NONE	NONE	NONE	NONE	NONE	0	0	0	0	0	0	0	0	0	0	0		NONE	NONE
10-15-68-00	20 mg oral daily	20	45	male	100	1.77	31.9193	YES	NKA	no			yes		a-fib	rivaroxiban	None	DM,HTN,DLD,AF,	97	29	112	32.89	6.76	82	141.599	NONE	NONE	NONE	NONE	NONE	0	0	0	0	0	1	1	0	0	0	1		NONE	NONE
10-16-21-32	20 mg oral daily	20	45	female	60	1.6	23.4375	NO	NKA	no			no			rivaroxiban	None	T2DM,Acute right lateral medullary stroke,multiple renal and splenic infarcts	19	13	107	36.82	5.76	41	169.919	NONE	NONE	NONE	NONE	NONE	0	0	0	0	0	0	0	0	0	0	1		NONE	NONE
01-18-35-50	20 mg oral daily	20	45	female	90	1.6	35.1562	NO	NKA	yes		PE,DVT	NO			rivaroxiban	None	DM,HTN,DLD,DVT,PE,perpral artery dissease	8	14	55	22.07	15.92	32	326.562	NONE	NONE	NONE	NONE	NONE	0	0	0	0	0	1	0	0	0	0	0		NONE	NONE
10-14-86-98	20 mg oral daily	20	45	female	80	1.6	31.25	NO	NKA	yes		PE	no			rivaroxiban	None	PE	35	14	99	34	12	85	109.281	NONE	NONE	NONE	NONE	NONE	0	0	0	0	0	0	0	0	0	0	0		NONE	NONE
10-16-23-49	20 mg oral daily	20	45	female	61	1.47	28.229	NO	NKA	yes		DVT	no			rivaroxiban	None	DVT,	146	90	198	32.71	3.72	40	177.069	NONE	NONE	NONE	NONE	NONE	0	0	0	0	0	0	0	0	0	0	0		NONE	NONE
00-94-26-52	20 mg oral tablet, 1 tab(s), Oral, qPM	20	45	male	89	1.66	32.2979	NO	NKA	no			no			rivaroxaban	None	IPAH	29	15	54	39.6	6.93	76	135.972	NONE	NONE	NONE	NONE	NONE	0	0	0	0	0	0	0	0	0	0	0		NONE	NONE
00-95-90-10	20 mg oral tablet, 1 tab(s), Oral, qPM	20	45	male	78	1.78	24.6181	no	NKA	no			yes			rivaroxaban	None	DM, HTN, Afib, hyperthyrodism	37	0	0	29.5	28.74	47	192.695	NONE	NONE	NONE	NONE	NONE	0	0	0	0	0	0	0	0	0	0	0		NONE	NONE
01-16-19-71	20 mg table orally aily	20	45	male	85	1.75	27.7551	NO	NKA	no			yes		A-FIB	rivaroxiban	None	DILATED CARDIOMYOPATHY, a-fib	40	18	48	40.79	7.72	77	128.175	NONE	NONE	NONE	NONE	NONE	0	0	0	0	0	1	0	0	0	0	0		NONE	NONE
00-21-48-79	rivaroxaban 20 mg/ 1 tab(s) Oral Daily	20	45	M	71	1.735	23.5863	NO	NKA	Yes	2016	DVT	NONE	NONE	NONE	RIVA	NO	DVT (RIGHT LEG)	35	14	99	34	12	85	96.9869	NONE	NONE	NONE	NONE	NONE	0	0	0	0	0	0	0	0	0	0	0		NONE	NONE
00-38-60-17	rivaroxaban 20 mg/ 1 tab(s) Oral Daily	20	45	M	69.3	1.675	24.7004	NO	NKA	Yes	17 YEARS BACK	DVT	NONE	NONE	NONE	RIVA	NO	LT LL DVT AROUND 17 YEARS BACK , 2018 ANOTHER DVT, RECURRENT DVT, PROTEN S DEFECIENCY	38	30	77	39.89	4.46	78	103.16	NONE	NONE	NONE	NONE	NONE	0	0	0	0	0	0	0	0	0	0	0		NONE	NONE
00-63-21-10	rivaroxaban15MG BID THEN 20 mg/ 1 tab(s) Oral Daily	20	45	F	58	1.62	22.1003	NO	NKA	NO	NONE	NONE	NONE	NONE	NONE	RIVA	NO	POST GASTERIC SLEEVE, CRVO CENTRAL RETINAL VEIN OCCLUSION	12	13	50	33.61	13.61	54	124.712	NONE	NONE	NONE	NONE	NONE	0	0	0	0	0	0	0	0	0	0	0		NONE	NONE
10-24-80-90	10 mg daily	10	46	female	92	1.62	35.0556	NO	NKA	no			no			rivaroxaban	None	Lateral malleolus fracture	35	14	99	34	12	85	124.35	NONE	NONE	NONE	NONE	NONE	0	0	0	0	0	1	0	0	0	0	0		NONE	NONE
10-18-93-09	10 mg daily	10	46	male	90	1.8	27.7778	NO	NKA	yes		Thrombosis of Lt transverse sinus, sigmoid sinus, proximal internal jugular vein, Lt superficial inferior anastomotic vein	no			rivaroxaban	None	Intracranial hemorrhage, thrombosis, seizure	39.9	26.3	81	51.4	17.3	87	118.851	NONE	NONE	NONE	NONE	NONE	0	0	0	0	0	0	0	0	0	0	0		NONE	NONE
01-15-70-46	10mg TAB, 10 mg, 1 tab(s), Oral, Daily	10	46	male	59	1.66	21.4109	NO	NKA	yes		DVT	no			rivaroxiban	None	DVT,DRY EYE	27	19	43.18	73	26.04	75	90.3793	NONE	NONE	NONE	NONE	NONE	0	0	0	0	0	0	0	0	0	0	0		NONE	NONE
00-73-51-18	rivaroxaban 10 mg/ 1 tab(s) Oral Daily	10	46	M	86	1.68	30.4705	NO	NKA	NO	NONE	NONE	NONE	NONE	NONE	RIVA	NO	RECURRENT DVT	35	14	99	34	12	85	116.241	NONE	NONE	NONE	NONE	NONE	0	0	0	0	0	0	0	0	0	0	0		NONE	NONE
10-06-53-81	15 mg daily	15	46	female	80	1.6	31.25	NO	NKA	no			no			rivaroxaban	None		24	26	46	39.05	7.52	67	137.181	NONE	NONE	NONE	NONE	NONE	0	0	0	0	0	1	0	0	0	1	1		NONE	NONE
10-24-81-62	15 mg daily	15	46	male	86	1.75	28.0816	NO	NKA	no			no			rivaroxaban	None	ablation of WPW, Palpitations	45	18	64	41.72	9.27	77	128.317	NONE	NONE	NONE	NONE	NONE	0	0	0	0	0	1	0	0	0	0	0		NONE	NONE
10-24-52-12	15 mg daily	15	46	male	99	1.81	30.2189	yes	NKA	no			yes		fast Afib	rivaroxaban	aspirin 81 mg, plavix 75 mg daily	IHD, Afib, Anxiety	18	19	87	28.93	9.07	80	142.175	NONE	NONE	NONE	NONE	NONE	0	0	0	1	0	0	0	0	0	0	0		NONE	NONE
00-17-78-61	rivaroxaban 15 mg / 1 tab(s) Oral Daily	15	46	F	60	1.54	25.2994	NO	NKA	Yes	?	DVT	NONE	NONE	NONE	RIVA	NO	RIGHT UPPER LIMB DVT	35	14	99	34	12	85	81.098	NONE	NONE	NONE	NONE	NONE	0	0	0	0	0	0	0	0	0	0	0		NONE	NONE
10-05-23-95	20 mg daily	20	46	female	83	1.59	32.831	NO	Augmentin, Bronchial Asthma, klavox	yes		Bilateral DVT	no			rivaroxaban	None	A.S.I.A, asthma, anxiety, DVT	18	14	96	34.98	9.43	63	151.362	NONE	NONE	NONE	NONE	NONE	0	0	0	0	0	1	1	0	0	0	1		NONE	NONE
10-08-04-33	20 mg daily	20	46	male	56	1.6	21.875	NO	NKA	yes		DVT	no			rivaroxaban	None	DVT, DM, DLD,	54	19	65	44.49	10.05	60	107.23	NONE	0.38	NONE	NONE	NONE	0	0	0	0	0	1	1	0	0	0	1		NONE	NONE
10-17-70-43	20 mg daily	20	46	female	80	1.8	24.6914	NO	NKA	yes		DVT	yes		Paroxysmal Atrial flutter	rivaroxaban	None	Friedreich's ataxia, AF, DM, hypothyrodism, Nephrotic syndrome, DVT, stroke, Bed bound	15	11	98	30.75	3.62	114	80.6238	NONE	NONE	NONE	NONE	NONE	0	0	0	0	0	1	1	0	0	0	1		NONE	NONE
10-03-96-51	20 mg daily	20	46	male	66	1.6	25.7812	NO	NKA	no			yes			rivaroxaban	aspirin, 81 mg, Oral, Daily	Afib, MPI, HTN, Ischemic stroke, EF 25%, CVA, on wheelchair	35	14	99	34	12	85	89.2078	NONE	NONE	NONE	NONE	NONE	0	0	0	0	0	1	0	0	0	0	1		NONE	NONE
01-12-32-77	20 mg daily	20	46	male	75	1.7	25.9516	yes	NKA	yes		LV thrombus	no			rivaroxaban	was on aspirin, 81 mg, Oral, Daily, clopidogrel 75 mg daily	DM, HTN, IHD,	46	25	62	35.84	8.66	70	123.095	NONE	NONE	NONE	NONE	NONE	0	0	0	0	0	0	0	0	1	0	0		NONE	NONE
01-06-00-32	20 mg daily	20	46	female	72.7	1.585	28.9385	NO	NKA	yes		DVT, PE	no			rivaroxaban	aspirin, 81 mg, Oral, Daily	hypothyroid, SLE, DVT, PE	19	18	41	37.98	6.46	50	167.048	NONE	NONE	NONE	NONE	NONE	0	0	0	0	0	0	0	0	0	0	0		NONE	NONE
10-08-95-94	20 mg daily	20	46	male	74	1.69	25.9095	NO	NKA	no			yes		Atrial fibrillation and atrial flutter, unspecified	rivaroxaban	aspirin, 81 mg, Oral, Daily	DLP, MV Repair, Afib	21	15	62	39.12	24.33	76	111.865	NONE	NONE	NONE	NONE	NONE	0	0	0	0	0	0	0	0	0	0	0		NONE	NONE
00-96-27-81	20 mg daily	20	46	female	81	1.53	34.6021	NO	NKA	yes		Rt arm DVT, Left LL, unprovoked PE	no			rivaroxaban	None	DM, HTN, IDA, depression, breast CA, VTEs	30	21	90	37.81	7.81	48	193.875	NONE	NONE	NONE	NONE	NONE	0	0	0	0	0	0	0	0	0	0	0		NONE	NONE
01-14-12-35	20 mg daily	20	46	female	90	1.61	34.7209	no	NKA	yes		DVT	no			rivaroxaban	None		36	26	74	34.84	4.14	70	147.714	NONE	NONE	NONE	NONE	NONE	0	0	0	0	0	0	0	0	0	0	0		NONE	NONE
02-24-75-10	20 mg daily	20	46	female	96	1.56	39.4477	NO	NKA	yes		DVT	no			rivaroxaban	None	DVT,	16	0	0	39.4	7.11	68	162.196	NONE	NONE	NONE	NONE	NONE	0	0	0	0	0	0	0	0	0	0	0		NONE	NONE
01-18-01-87	20 mg oral qpm	20	46	male	75	1.7	25.9516	yes	NKA	yes		PE	no			rivaroxiban	None	PE,HFrEF,	37	35	130	33.67	25.02	161	53.5197	NONE	NONE	NONE	NONE	NONE	0	0	0	0	0	1	1	0	0	0	1		NONE	NONE
01-15-29-28	20 mg oral tablet, 1 tab(s), Oral, qPM	20	46	female	94	1.485	42.626	NO	NKA	YES		DVT	NO			rivaroxiban	None		21	31	78	39	9.39	67	161.187	NONE	NONE	NONE	NONE	NONE	0	0	0	0	0	0	0	0	0	1	0		NONE	NONE
00-88-17-39	20 mg oral tablet, 1 tab(s), Oral, qPM	20	46	female	116.9	1.69	40.9299	NO	NKA	yes		portal vein thrombosis and retinal vein thrombosis	no			rivaroxaban	None	HTN, anxiety	16	18	79	36.18	10.5	48	279.802	NONE	NONE	NONE	NONE	NONE	0	0	0	0	0	1	0	0	0	0	0		NONE	NONE
10-12-57-57	20 mg oral tablet, 1 tab(s), Oral, qPM	20	46	female	75	1.6	29.2969	NO	NKA	no			no			rivaroxiban	None	,hypothyrodsim	16	13	102	36.81	6.14	63	136.772	NONE	NONE	NONE	NONE	NONE	0	0	0	0	0	0	0	0	0	0	0		NONE	NONE
00-91-46-72	20 mg qPM	20	46	female	81	1.58	32.4467	NO	NKA	no			no			rivaroxaban	None	Activity intolerance risk, knee pain	27	19	83	37.52	3.95	46	202.304	NONE	NONE	NONE	NONE	NONE	0	0	0	0	0	0	0	0	0	0	0		NONE	NONE
00-70-78-56	rivaroxaban 20 mg/ 1 tab(s) Oral Daily	20	46	M	79	1.7	27.3356	NO	NKA	NO	NONE	NONE	NONE	NONE	NONE	RIVA	ASA	CHRONIC RT BRACHIAL VEIN THROMBOSIS, GASTRIC BYPASS SURGERY, DM	62	28	62	40.81	7.61	81	112.052	NONE	NONE	NONE	NONE	NONE	0	0	0	0	0	0	0	0	0	0	1		NONE	NONE
00-23-58-16	rivaroxaban 20 mg/ 1 tab(s) Oral Daily	20	46	F	75	1.67	26.8923	NO	NKA	Yes	2016	PE	NONE	NONE	NONE	RIVA	ASA	PROVOKED VTE (PE) IN 2016, OCP RELATED . ULCERATIVE COLITIS,	12	5	74	26.31	2.77	80	107.708	NONE	NONE	NONE	NONE	NONE	0	0	0	0	0	0	0	0	0	0	0		NONE	NONE
00-66-50-47	rivaroxaban 20 mg/ 1 tab(s) Oral Daily	20	46	F	85	1.6	33.2031	NO	NKA	NO	NONE	NONE	NONE	NONE	NONE	RIVA	NO	STROKE, AFIB, PARTIAL AORTIC THROMBUS	24	10	99	32.56	3.77	46	212.295	NONE	NONE	NONE	NONE	NONE	0	0	0	0	0	0	0	0	0	0	0		NONE	NONE
00-68-31-73	rivaroxaban 20 mg/ 1 tab(s) Oral Daily	20	46	M	126	1.82	38.0389	NO	NKA	Yes	2018	DVT	NONE	NONE	NONE	RIVA	NO	MULTIPLE LL DVT INVOLVING BOTH LIMB, IN 2018 SHE OFF AC FOR THE PAST 7 MONTHS , PRESENTED IN 2018 WITH DVT	35	14	99	34	12	85	170.306	NONE	NONE	NONE	NONE	NONE	0	0	0	0	0	0	0	0	0	0	0		NONE	NONE
00-81-28-53	rivaroxaban 20 mg/ 1 tab(s) Oral Daily	20	46	F	84.1	1.57	34.119	NO	NKA	NO	NONE	NONE	NONE	NONE	NONE	RIVA	None	VENOUS SINUS THROMBOSIS IN 2018 SHE USED RIVA FOR ONE YEAR THEM THEY STOP IT, SHE IS FINE	35	14	99	34	12	85	113.672	NONE	NONE	NONE	NONE	NONE	0	0	0	0	0	0	0	0	0	0	0		NONE	NONE
10-15-64-25	15 mg BID for 20 days	30	46	female	69	1.66	25.0399	NO	NKA	no			yes			rivaroxiban	aspirin 81 mg	HTN,Pulmonary thrombectomy ,ASTHMA	11	12	55	25.52	6.08	37	214.252	NONE	NONE	NONE	NONE	NONE	0	0	0	0	0	1	0	0	0	0	0		NONE	NONE
00-30-25-94	rivaroxaban 15 mg BID FOR 21 DAYS THEN 20MG Daily	30	46	M	126.7	1.76	40.9026	NO	NKA	Yes	2016	DVT, PE	NONE	NONE	NONE	RIVA	ASA	DLD, OBESE , DVT, PE IN 29016	35	14	99	34	12	85	171.252	NONE	NONE	NONE	NONE	NONE	0	0	0	0	0	0	1	0	0	0	0		NONE	NONE
01-01-78-01	10 mg daily	10	47	female	63	1.57	25.5588	NO	NKA	yes		DVT	no			rivaroxaban	None	Anxiet, DVT	45	131	513	22.77	190.76	74	96.7703	NONE	NONE	NONE	NONE	NONE	0	0	0	0	0	1	0	0	0	0	1		NONE	NONE
01-09-58-00	10 mg daily	10	47	male	72	1.78	22.7244	yes	NKA	no			no			rivaroxaban	None	DM, MVA, POST SUBTALAR FUSION	77	40	114	40	6	98	83.5102	NONE	NONE	NONE	NONE	NONE	0	0	0	0	0	0	0	0	0	0	1		NONE	NONE
10-21-73-35	10 mg daily	10	47	male	69	1.68	24.4473	NO	NKA	no			no			rivaroxaban	None	one tibia and fibula oblique fracture	77	66	68	36.76	14.41	75	104.573	NONE	NONE	NONE	NONE	NONE	0	0	0	0	0	0	0	0	0	0	0		NONE	NONE
01-12-70-26	10 mg daily	10	47	female	94.9	1.71	32.4544	no	NKA	yes		PE	no			rivaroxaban	None	pancreatitis, Ulcerative colitis	23	27	95	32.05	3.33	46	234.499	NONE	NONE	NONE	NONE	NONE	0	0	0	0	0	0	0	0	0	0	0		NONE	NONE
00-70-46-65	rivaroxaban 10 mg/ 1 tab(s) Oral Daily	10	47	M	179	1.86	51.7401	NO	NKA	NO	NONE	NONE	NONE	NONE	NONE	RIVA	NO	MORBID OBESE, BARIATRIC SURGERY, SLE, LUPUS NEPHRITIS, APS WITH HX OF LL DVT	31	16	125	34.59	5.59	74	274.95	NONE	NONE	NONE	NONE	NONE	0	0	0	0	0	0	0	0	0	0	0		NONE	NONE
01-01-78-01	rivaroxaban 15 mg / 1 tab(s) Oral Daily	15	47	F	63	1.6	24.6094	NO	NKA	NO	NONE	NONE	None	None	None	Rivaroxaban	None	Breast cancer,(Metastasis)	16	28	128	31.99	15.81	48	149.188	None	None	None	None	None	0	0	0	0	0	1	0	1	0	1	1		NONE	NONE
00-35-11-75	rivaroxaban 15 mg / 1 tab(s) Oral Daily	15	47	M	77	1.65	28.2828	NO	NKA	NO	NONE	NONE	NONE	NONE	NONE	RIVA	NO	SLEEVE GASTERECTOMY DONE IN JORDAN 2016 COMPLICATED WITH SPLEEN PORTAL VEIN THROMBOSIS, HX OF PORTAL VEIN THROMBOSIS	35	14	99	34	12	85	102.969	NONE	NONE	NONE	NONE	NONE	0	0	0	0	0	0	0	0	0	0	0		NONE	NONE
01-02-14-58	20 mg daily	20	47	female	75	1.59	29.6665	NO	NKA	yes		left LL DVT ,provoked by progesterone and pregnency	no			rivaroxaban	None	DVT	10	10	76	37.15	14.04	66	129.167	NONE	NONE	NONE	NONE	NONE	0	0	0	0	0	1	0	0	0	0	1		NONE	NONE
10-20-97-73	20 mg daily	20	47	male	81	1.7	28.0277	yes	NKA	no			yes		PAF	rivaroxaban	None	DM, DLD, PAF, Progressive decreased hearing	73	41	101	35.92	11.66	68	135.397	NONE	NONE	NONE	NONE	NONE	0	0	0	0	0	1	0	0	0	0	1		NONE	NONE
01-08-78-76	20 mg daily	20	47	female	139.4	1.74	46.0431	NO	NKA	no			yes		PAF	rivaroxaban	None	Afib, HTN, BA, acute pancreatitis	23	21	58	32.48	4.5	44	360.117	NONE	NONE	NONE	NONE	NONE	0	0	0	0	0	1	0	0	0	0	0		NONE	NONE
00-96-92-56	20 mg daily	20	47	male	69.6	1.72	23.5262	NO	NKA	no			no			rivaroxaban	None	IHD, HF, anxiety	22	21	153	33	26.83	107	73.9364	NONE	NONE	NONE	NONE	NONE	0	0	0	0	0	0	0	0	0	0	0		NONE	NONE
01-19-46-55	20 mg daily	20	47	male	107	1.757	34.6609	NO	NKA	no			no			rivatoxaban	None		5	14	99	34	12	85	143.086	NONE	NONE	NONE	NONE	NONE	0	0	0	0	0	0	0	0	0	0	0		NONE	NONE
01-07-97-95	20 mg daily	20	47	male	81.5	1.74	26.919	NO	NKA	yes	42278	Bilateral PE	no			rivaroxaban	None	PE, Abdominal mass	39	23	63	40.16	6.66	98	94.5289	NONE	0.37	NONE	NONE	NONE	0	0	0	0	0	0	0	0	0	0	0		NONE	NONE
00-90-42-28	20 mg oral daily	20	47	female	110.9	1.635	41.4855	NO	NKA	yes		DVT	no			rivaroxaban	None	IGT, chronic neck pain	23	18	69	37.16	8.29	57	221.151	NONE	NONE	NONE	NONE	NONE	0	0	0	0	0	0	0	0	0	0	0		NONE	NONE
10-15-11-96	20 mg oral daily	20	47	male	113	1.8	34.8765	YES	NKA	no			no			rivaroxiban	None	DM,HTN, SARCOIDOSIS ,CHF	26	22	98	41.42	7.02	78	164.671	NONE	NONE	NONE	NONE	NONE	0	0	0	0	0	1	0	0	0	1	1		NONE	NONE
01-19-17-65	20 mg oral qpm	20	47	female	84	1.576	33.8195	NO	NKA	yes		DVT	no			rivaroxiban	None	cortical vein thrombos,DVT	25	16	86	36	5.48	53	180.151	NONE	NONE	NONE	NONE	NONE	0	0	0	0	0	0	0	0	0	0	0		NONE	NONE
10-11-53-58	20 mg oral tablet, 1 tab(s), Oral, qPM	20	47	male	100	1.8	30.8642	yes	NKA	no			yes		A-fib	rivaroxiban	aspirin 81 mg	HTN,CHF,A-FIB	24	14	99	38.8	7.03	178	63.8577	NONE	NONE	NONE	NONE	NONE	0	0	0	0	0	1	0	0	0	0	1		NONE	NONE
00-96-66-72	rivaroxaban 20 mg oral tablet, warfarin, 3.5 mg, Oral, Daily, warfarin, 6 mg, Oral, Daily	20	47	female	110.7	1.56	45.4882	NO	NKA	yes		PE	no			rivaroxaban, warfarin	None	Crohn's colitis, prediabetes, anxiety	19	15	99	34.89	10.64	79	159.277	NONE	NONE	NONE	NONE	NONE	0	0	0	0	0	1	0	0	0	0	0		NONE	NONE
00-50-92-05	rivaroxaban 20 mg/ 1 tab(s) Oral Daily	20	47	F	100	1.62	38.1039	NO	NKA	NO	NONE	NONE	NONE	NONE	NONE	RIVA	NO	RECURRENT DVT,	22	17	110	38.29	4.37	62	183.333	NONE	NONE	NONE	NONE	NONE	0	0	0	0	0	0	0	0	0	0	0		NONE	NONE
00-76-31-97	rivaroxaban 20 mg/ 1 tab(s) Oral Daily	20	47	F	91.8	1.65	33.719	NO	NKA	NO	NONE	NONE	NONE	NONE	NONE	RIVA	NO	ANTI THROMBIN II DEFE. RECURRENT DVT ON LIFE LONG AC, LEFT BREAST LUMPECTOMY	49	24	72	37.84	11.74	56	186.332	NONE	NONE	NONE	NONE	NONE	0	0	0	0	0	0	0	0	0	0	0		NONE	NONE
00-41-69-28	rivaroxaban 20 mg/ 1 tab(s) Oral Daily	20	47	M	90	1.78	28.4055	NO	NKA	NO	NONE	NONE	NONE	NONE	NONE	RIVA	NO	AFIB, ANAPLASTIC ASTROCYTOMA , TIA,	35	14	99	34	12	85	120.353	NONE	NONE	NONE	NONE	NONE	0	0	0	0	0	0	0	0	0	0	0		NONE	NONE
00-19-37-55	rivaroxaban 20 mg/ 1 tab(s) Oral Daily	20	47	F	73.8	1.53	31.5263	NO	NKA	Yes	2016	DVT	NONE	NONE	NONE	RIVA	NO	SLEEVE GASTRECTOMY 2016 COMPLICATED BY THROMBOSIS	35	14	99	34	12	85	98.6894	NONE	NONE	NONE	NONE	NONE	0	0	0	0	0	0	0	0	0	0	0		NONE	NONE
00-24-38-79	rivaroxaban 20 mg/ 1 tab(s) Oral Daily	20	47	F	78	1.64	29.0006	NO	NKA	Yes	?	DVT	NONE	NONE	NONE	RIVA	NO	APS, AFIB, PREVIOUS DVT TWICE	22	14	99	38.9	14.06	60	147.767	NONE	NONE	NONE	NONE	NONE	0	0	0	0	0	0	0	0	0	0	0		NONE	NONE
00-63-64-03	rivaroxaban 20 mg/ 1 tab(s) Oral Daily	20	47	F	66	1.6	25.7812	NO	NKA	Yes	RECURRENT	DVT	NONE	NONE	NONE	RIVA	NO	RECURRENT DVT, 1ST PROVOKED IN 2008, 2ND UNPROVOKED IN 2014, HETEROZYGOUS FVL MUTATION, SHE WAS ON RIVA SINCE 2014	19	12	63	34.62	6.58	59	127.153	NONE	NONE	NONE	NONE	NONE	0	0	0	0	0	0	0	0	0	0	0		NONE	NONE
00-54-80-67	rivaroxaban15MG BID THEN 20 mg/ 1 tab(s) Oral Daily	20	47	F	107.5	1.558	44.2867	NO	NKA	Yes	2019	PE	NONE	NONE	NONE	RIVA	NO	HTN, MORBID OBESITY, DEXTROCARDIA, ,SUB MASSIVE PE POST RT ADNEXEAL MASS	20	9	85	39.45	7.44	55	222.167	NONE	NONE	NONE	NONE	NONE	0	0	0	0	0	1	0	0	0	0	0		NONE	NONE
00-89-08-05	10 mg daily	10	48	female	70	1.5	31.1111	NO	NKA	yes		Multiple VTEs	no			rivaroxaban	None	factor x deficiency, stroke, hypothyrodism, multiple VTEs	18	0	0	32.2	2.76	72	109.321	NONE	0.27	NONE	NONE	NONE	0	0	0	0	0	0	0	1	0	0	0		NONE	NONE
10-09-09-01	10 mg daily	10	48	female	73.5	1.68	26.0417	NO	paracetamol	no			no			rivaroxaban	None	post LAPIDUS PROSEDURE	16	18	63	37.41	4.84	55	150.267	NONE	NONE	NONE	NONE	NONE	0	0	0	0	0	0	0	0	0	0	0		NONE	NONE
10-16-42-94	10 mg daily	10	48	female	87	1.58	34.8502	NO	NKA	yes		SUPERFICIAL THROMBOSIS	no			rivaroxiban	None	breast Ca, SUPERFICIAL THROMBOSIS	26	18	176	40.91	9.15	75	130.436	NONE	NONE	NONE	NONE	NONE	0	0	0	0	0	0	0	0	0	0	0		NONE	NONE
01-20-87-77	10 mg daily	10	48	male	60	1.62	22.8624	NO	NKA	yes		unprovoked PORTAL VEIN THROMBOSIS	no			rivaroxaban	None	PORTAL VEIN THROMBOSIS, SPLENECTOMY FOR RTA 19 YEARS BACK	34	22	66	41.34	8.1	96	70.2778	NONE	NONE	NONE	NONE	NONE	0	0	0	0	0	0	0	0	0	0	0		NONE	NONE
10-15-17-74	10 mg oral daily	10	48	male	78	1.79	24.3438	NO	NKA	no			no			rivaroxiban	None	DM,HTN,	108	66	59	40.89	9.13	79	111.021	NONE	NONE	NONE	NONE	NONE	0	0	0	0	0	1	0	0	0	0	1		NONE	NONE
10-13-20-77	10 mg oral daily	10	48	female	80.5	1.63	30.2985	NO	NKA	no			no			rivaroxiban	None	LEFT FOOT RECONSTRUCTION ,	21	16	61	34.62	3.6	40	226.294	NONE	NONE	NONE	NONE	NONE	0	0	0	0	0	0	0	0	0	0	0		NONE	NONE
10-15-76-51	10 mg oral daily	10	48	male	81	1.77	25.8546	NO	NKA	yes		DVT	no			rivaroxiban	None	DVT, Ulcerative Colitis,	28	79	70	23.2	5.78	120	75.9	NONE	NONE	NONE	NONE	NONE	0	0	0	0	0	0	0	0	0	0	0		NONE	NONE
00-02-32-82	rivaroxaban 10 mg/ 1 tab(s) Oral Daily	10	48	F	78	1.63	29.3575	NO	NKA	Yes	?	PE	NONE	NONE	NONE	RIV	NO	SLEEP APNEA SYNDROME ON CPAP, ASTHMA, EPILEPSY, PE, SECONDARY ERYTHROCYTOSIS (JACK-VE) HYPOTHYROIDISIM,	15	12	76	29.74	6.64	98	89.4966	NONE	NONE	NONE	NONE	NONE	0	0	0	0	0	1	1	0	0	0	0		NONE	NONE
00-15-82-96	rivaroxaban 10 mg/ 1 tab(s) Oral Daily	10	48	F	76	1.6	29.6875	NO	CONTRAST MEDIA IODINE BASE	NO	NONE	NONE	NONE	NONE	NONE	RIVA	NO	UNPROVOKED DVT TWICE , TIA	17	11	67	36.18	5.52	68	125.673	NONE	NONE	NONE	NONE	NONE	0	0	0	0	0	0	0	0	0	0	0		NONE	NONE
10-22-66-17	15 mg daily	15	48	female	72	1.58	28.8415	NO	NKA	no			no			rivaroxaban	None	DM, Mitral valve disease, did mitral valve dilatation, RHD	25	48	52	32.56	9.38	46	176	NONE	NONE	NONE	NONE	NONE	0	0	0	0	0	0	0	0	0	0	1		NONE	NONE
01-19-91-78	15 mg daily	15	48	male	77	1.59	30.4577	NO	NKA	no			yes		PAF	rivaroxaban	None	Afib, MV replacement, EF 35-40%	48	26	77	45	14.56	94	92.1087	NONE	NONE	NONE	NONE	NONE	0	0	0	0	0	0	0	0	0	1	0		NONE	NONE
10-13-18-72	15 mg oral daily	15	48	female	72	1.55	29.9688	NO	NKA	no			no			rivaroxiban	asprin 81 mg	HTN,DM, CABG,DLD	22	17	99	33.1	8.58	59	137.22	NONE	NONE	NONE	NONE	NONE	0	0	0	0	0	1	0	0	1	0	0		NONE	NONE
00-43-60-40	rivaroxaban 15 mg / 1 tab(s) Oral BID	15	48	M	74	1.7	25.6055	NO	NKA	NO	NONE	NONE	None	None	None	Rivaroxaban	None	None	28	25	174	21.26	7.73	44	189.111	None	None	None	None	None	0	0	0	0	1	0	0	0	0	0	0		NONE	NONE
00-84-58-60	15 mg oral BID for 18 days, then 20 mg oral once daily to complete 6 months	20	48	male	65.4	1.66	23.7335	no	NKA	yes	43297	Acute pulmonary embolism	no			Rivaroxaban	aspirin, 81 mg, Oral, Daily	DM, DLD, CML	35	14	99	34	12	85	86.5161	NONE	NONE	NONE	NONE	NONE	0	0	0	0	0	1	0	1	0	0	1		NONE	NONE
01-10-11-49	20 mg daily	20	48	female	63	1.56	25.8876	NO	NKA	yes	18/9/2016	ilio-femoral DVT	no			rivaroxaban	None	DVT, post thrombotic varicose vien referred to vascular surgery	12	0	0	35	3.45	65	108.985	NONE	NONE	NONE	NONE	NONE	0	0	0	0	0	1	0	0	0	1	1		NONE	NONE
01-02-82-66	20 mg daily	20	48	female	98	1.67	35.1393	NO	NKA	yes		DVT, PE	no			rivaroxaban	None	DVT, stroke, aschemic	19	11	67	33.04	5.89	52	211.915	NONE	NONE	NONE	NONE	NONE	0	0	0	0	0	1	0	0	1	0	1		NONE	NONE
10-16-48-38	20 mg daily	20	48	female	107	1.52	46.3123	NO	NKA	no			yes			rivaroxiban	None	AF, obese, DM, HTN, DLD	21	10	126	37.83	3.71	59	203.925	NONE	NONE	NONE	NONE	NONE	0	0	0	0	0	1	1	0	0	0	1		NONE	NONE
10-18-80-86	20 mg daily	20	48	male	60.5	1.6	23.6328	NO	NKA	no			no			rivaroxaban	None	DM, STEMI ( extensive ) anterolateral and inferior	26	31	73	29.16	9.24	97	70.1329	NONE	NONE	NONE	NONE	NONE	0	0	0	0	0	0	0	0	0	0	1		NONE	NONE
10-05-36-17	20 mg daily	20	48	male	98	1.7	33.91	NO	NKA	no			no			rivaroxaban	None	TIA, DM, SEVERE DCMP	25	22	55	37.59	10.01	86	128.134	NONE	NONE	NONE	NONE	NONE	0	0	0	0	0	0	0	0	0	0	0		NONE	NONE
01-07-88-78	20 mg daily	20	48	female	61.4	1.55	25.5567	NO	NKA	yes	2012	Bilateral PE	no			rivaroxaban	None	IDA, hypothyrodism, PE, POSITIVE for heterozygous G20210A factor II prothrombin mutation in F2 gene	20	13	57	34.24	7.08	42	164.383	NONE	0.49	NONE	NONE	NONE	0	0	0	0	0	0	0	0	0	0	0		NONE	NONE
01-20-63-76	20 mg daily	20	48	female	87.4	1.554	36.1917	NO	NKA	yes		IVC, SMV AND PE	no			rivaroxaban	None	dizziiness, RECURRENT THROMBOSIS	15	9	121	29.24	1.95	117	83.997	NONE	NONE	NONE	NONE	NONE	0	0	0	0	0	0	0	0	0	0	0		NONE	NONE
10-08-59-97	20 mg daily	20	48	female	119	1.55	49.5317	NO	NKA	yes	42583	left lower limb, (unprovoked)	no			rivaroxaban	None	obesity, DVT	23	16	108	33.97	7.56	72	185.846	NONE	NONE	NONE	NONE	NONE	0	0	0	0	0	0	0	0	0	0	0		NONE	NONE
01-03-09-03	20 mg daily	20	48	male	81	1.65	29.7521	NO	NKA	yes		portal pain thrombosis	no			rivaroxaban	None	CIDP, DM	51	23	70	37.32	15.17	71	128.282	NONE	NONE	NONE	NONE	NONE	0	0	0	0	0	0	0	0	0	0	0		NONE	NONE
10-21-08-94	20 mg daily	20	48	male	59	1.62	22.4813	NO	NKA	yes		DVT	no			rivaroxaban	None	post LSG, COMPLICATED LEAK, DVT	39	25	123	22.59	7.86	40	165.856	NONE	NONE	NONE	NONE	NONE	0	0	0	0	0	0	0	0	0	0	0		NONE	NONE
10-15-80-44	20 mg oral daily	20	48	male	86	1.72	29.0698	NO	NKA	no			yes		a-fib	rivaroxiban	clopidogrel 75 mg	DM,HTN,AF,IHD	22	15	87	33.53	8.06	70	138.146	NONE	NONE	NONE	NONE	NONE	0	0	0	0	0	1	0	0	0	0	1		NONE	NONE
10-15-23-66	20 mg oral daily	20	48	male	96	1.73	32.0759	NO	NKA	no			yes		a-fib	rivaroxiban	None	Psoriasis,HTN,DLD,AF,CKD,HFpEF	27	18	94	38.04	6.64	223	48.4066	NONE	NONE	NONE	NONE	NONE	0	0	0	0	0	1	1	0	0	1	0		NONE	NONE
00-95-60-95	20 mg oral tablet	20	48	male	106	1.735	35.2133	NO	NKA	no			yes		AF paroxismal	rivaroxaban	None	Afib, DLP	35	14	99	34	12	85	140.225	NONE	NONE	NONE	NONE	NONE	0	0	0	0	0	1	0	1	0	0	1		NONE	NONE
10-12-62-22	20 mg oral tablet, 1 tab(s), Oral, qPM	20	48	female	100	1.59	39.5554	NO	NKA	no			yes		a-fib	rivaroxiban	None	afib,ADHF,RHD	13	8	81	30.08	6.41	53	212.159	NONE	NONE	NONE	NONE	NONE	0	0	0	0	0	0	0	0	0	0	0		NONE	NONE
00-88-95-29	20 mg, Oral, Daily	20	48	male	91	1.76	29.3776	NO	NKA	no			yes			rivaroxaban	None	H/O cardiac surgery	26	25	90	36.39	11.24	77	132.889	NONE	NONE	NONE	NONE	NONE	0	0	0	0	0	0	0	0	0	0	0		NONE	NONE
00-00-79-05	rivaroxaban 20 mg / 1 tab(s) Oral QPM	20	48	M	87	1.62	33.1504	NO	HAIR COLORING PRODUCT	Yes	2017	PE	NONE	NONE	NONE	RIVA	NONE	SICKLE CELL, PE, PROTEIN URIA, ADRENAL MASS	26	18	129	33.42	10.66	75	130.436	NONE	NONE	NONE	NONE	NONE	0	0	0	0	0	0	1	1	0	0	0		NONE	NONE
00-82-60-02	rivaroxaban 20 mg/ 1 tab(s) Oral Daily	20	48	M	74	1.67	26.5338	NO	NKA	Yes	2006	DVT	NONE	NONE	NONE	RIVA	NO	T2DM, RECURRENT DVT 14 YEARS AGO, ISCHEMIC STROKE, TIA IN 9-2018 WITH FULL RECOVERY, MV MASS	43	34	115	35.3	5.23	88	94.5556	NONE	NONE	NONE	NONE	NONE	0	0	0	0	0	0	0	0	0	0	1		NONE	NONE
00-14-39-71	rivaroxaban 20 mg/ 1 tab(s) Oral Daily	20	48	F	125	1.58	50.0721	NO	CLOROX	Yes	?	PE	NONE	NONE	NONE	RIVA	ASA	HTN, DM, GRAVIS DISEASE, HX OF PE, MORBID OBESITY	51	17	81	32.4	4.02	78	180.199	NONE	NONE	NONE	NONE	NONE	0	0	0	1	1	0	0	0	0	0	0		NONE	NONE
00-10-87-91	rivaroxaban 20 mg/ 1 tab(s) Oral Daily	20	48	F	87.7	1.7	30.346	NO	NKA	Yes	?	DVT	NONE	NONE	NONE	RIVA	ASA	UNPROVOKED DVT,	32	21	67	33.34	9.67	56	176.096	NONE	NONE	NONE	NONE	NONE	0	0	0	0	0	0	0	0	0	0	0		NONE	NONE
00-80-01-31	rivaroxaban 20 mg/ 1 tab(s) Oral Daily	20	48	F	86	1.52	37.223	NO	NKA	Yes	2018	DVT	NONE	NONE	NONE	RIVA	NO	IDA, PROVOKED RECURRENT DVT, 1ST 12 YEARS AGO THEN 5 YEARS BACK SHE HAD ANOTHER DVT AFTER VARICOSE VEIN LASER THERAPY, SHE HAD BEEN OFF AC FOR YEAR THEN SHE CAME IN 2018 WITH RT LEG SWELLING	21	17	50	36.27	10.57	52	185.966	NONE	NONE	NONE	NONE	NONE	0	0	0	0	0	0	0	0	0	0	0		NONE	NONE
01-12-81-78	10 mg daily	10	49	female	79	1.635	29.5523	no	NKA	yes		DVT	no			rivaroxaban	aspirin, 81 mg, Oral, Daily	RA, PFO found on TEE	19	15	57	31.58	5.99	76	115.613	NONE	NONE	NONE	NONE	NONE	0	0	0	0	0	1	1	0	0	0	1		NONE	NONE
01-10-01-70	10 mg daily	10	49	female	85	1.63	31.9922	NO	NKA	no			no			rivaroxaban	None	TKR, GASTRITIS	20	14	56	35.61	15.51	52	181.806	NONE	NONE	NONE	NONE	NONE	0	0	0	0	0	1	0	0	0	0	1		NONE	NONE
01-10-16-92	10 mg daily	10	49	male	69	1.693	24.0733	NO	NKA	yes		Recurrent DVT/PE	no			rivaroxaban	None	HTN, PE, DVT	19	22	92	26.26	5.92	128	59.9557	NONE	NONE	NONE	NONE	NONE	0	0	0	0	0	0	0	0	0	0	0		NONE	NONE
00-85-00-67	10 MG DAILY	10	49	female	84	1.59	33.2265	NO	NKA	yes		UNPROVOKED	no			rivaroxaban	None	DM, HTN, PVD, DVT, RAS, sever RV and LV dysfunction, renal artery stenosis	20	5	102	35.56	5.81	70	133.467	NONE	NONE	NONE	NONE	NONE	0	0	0	0	0	1	0	0	0	1	1		NONE	NONE
01-16-33-91	10 mg daily	10	49	male	163	1.73	54.4622	no	NKA	yes		DVT	NO			rivaroxiban	None	DM,HTN,HF	41	21	101	34.6	6.97	77	235.444	NONE	NONE	NONE	NONE	NONE	0	0	0	0	0	0	0	0	0	0	0		NONE	NONE
10-13-24-73	10 mg oral daily	10	49	female	58	1.59	22.9421	NO	NKA	yes	16th of July 2018	DVT	no			rivaroxiban	asprin 81 mg	HTN,DVT	37	22	72	39.33	4.94	69	93.4911	NONE	NONE	NONE	NONE	NONE	0	0	0	0	0	1	0	0	0	0	1		NONE	NONE
00-90-06-50	10 mg, Oral, Daily	10	49	female	52	1.52	22.5069	NO	NKA	yes		thrombosis of veinous on xarilto	no			rivaroxaban	aspirin, 81 mg, Oral, Daily	CAD, DM, HTN, DLD, anxiety, stroke	35	18	130	29.88	7.34	87	66.4777	NONE	NONE	NONE	NONE	NONE	0	0	0	0	0	1	1	0	0	0	1		NONE	NONE
00-82-27-89	rivaroxaban 10 mg/ 1 tab(s) Oral Daily	10	49	F	72.8	1.581	29.1251	NO	NKA	NO	NONE	NONE	NONE	NONE	NONE	RIVA	NO	PROVOKED DVT IN 2008 SECONDARY OCP TREATED ON WARFARIN FOR 6 MONTH , THEN CONTINUE WITH RIVAROXABAN. AS DVT PROVOKED THEY STOP RIVAROXABAN IN JAN, 2020	29	15	79	37.92	7.22	53	152.773	NONE	NONE	NONE	NONE	NONE	0	0	0	0	0	0	0	0	0	0	0		NONE	NONE
00-58-55-53	rivaroxaban 10 mg/ 1 tab(s) Oral Daily	10	49	F	69.4	1.53	29.6467	NO	NKA	Yes	?	DVT	NONE	NONE	NONE	RIVA	NO	HX OF PROVOKED DVT	30	20	71	39.8	9.43	67	115.206	NONE	NONE	NONE	NONE	NONE	0	0	0	0	0	0	0	0	0	0	0		NONE	NONE
01-06-03-02	15 mg daily	15	49	male	75	1.65	27.5482	NO	NKA	no			yes			rivaroxaban	None	MVR,epilipsy , Afib	959	5468	93	20.86	29.94	322	25.9058	NONE	NONE	NONE	NONE	NONE	0	0	0	0	0	1	0	0	0	0	1		NONE	NONE
01-18-85-10	15 mg oral qpm	15	49	male	63.1	1.69	22.0931	yes	NKA	no			yes		A-fib	rivaroxiban	None	a-fib, HF,DIALATED CARDIOMYOPATHY	30	29	95	28.07	30.52	145	48.4008	NONE	NONE	NONE	NONE	NONE	0	0	0	0	0	0	0	0	0	1	0		NONE	NONE
01-18-85-10	rivaroxaban 15 mg / 1 tab(s) Oral Daily	15	49	M	66	1.69	23.1084	Yes	NKA	NO	NONE	NONE	None	None	None	Rivaroxaban	None	HF, AFIB, COPDADHF, T2RF	31	56	97	26.87	48.59	130	56.4667	None	None	None	None	None	0	0	0	0	0	1	0	1	0	1	1		NONE	NONE
10-04-71-98	20 mg daily	20	49	female	86	1.6	33.5937	NO	NKA	yes		cerebral venous thrombosis	no			rivaroxaban	None	cerebral venous thrombosis	6	7	47	33.52	6.26	44	217.389	NONE	0.27	NONE	NONE	NONE	0	0	0	0	0	1	0	0	0	0	1		NONE	NONE
10-18-43-51	20 mg daily	20	49	male	120	1.83	35.8327	NO	NKA	yes		PE	no			rivaroxaban	None	PE, DM, Left tinnitus	36	36	108	42.71	16.68	88	151.667	NONE	NONE	NONE	NONE	NONE	0	0	0	0	0	0	0	0	0	0	1		NONE	NONE
10-17-21-13	20 mg daily	20	49	female	90.9	1.645	33.5917	NO	NKA	no			yes			rivaroxiban	None	IDA, HTN, AF, HF, GERD	23	29	99	35.05	9.54	79	127.976	NONE	NONE	NONE	NONE	NONE	0	0	0	0	0	1	0	0	0	1	0		NONE	NONE
10-08-46-77	20 mg daily	20	49	female	70.7	1.45	33.6266	NO	NKA	yes		thrombosed splenic vein	no			rivaroxaban	None	bipolar disorder, Post rt hemithyroidectomy, Neck exploration for neck hematoma, Iatrogenic Tracheal injury	47	27	136	37.95	5.19	67	117.364	NONE	NONE	NONE	NONE	NONE	0	0	0	0	0	1	1	0	0	0	0		NONE	NONE
00-98-66-66	20 mg daily	20	49	male	80	1.6	31.25	NO	NKA	no			yes		permanent atrial fibrillation	rivaroxaban	aspirin 81 mg daily	familial cardiomyopathy- EF 30 %, permanent atrial fibrillation, S/P ICD implantation for primary prevention, DM	73	37	135	39	12.82	92	96.715	NONE	NONE	2	NONE	NONE	0	0	0	0	0	1	0	0	0	0	0		NONE	NONE
10-02-15-39	20 mg daily	20	49	female	123	1.55	51.1967	NO	NKA	no			no			rivaroxaban	None	At risk of DVT, post MVA, Impaired skin integrity related to immobility	58	21	389	30	18.34	28	488.583	NONE	NONE	NONE	NONE	NONE	0	0	0	0	0	0	0	0	0	0	0		NONE	NONE
10-18-01-40	20 mg daily	20	49	female	76	1.55	31.6337	NO	NKA	no			yes			rivaroxaban	None	IBS, Afib,	20	20	45	36.82	5.77	60	140.881	NONE	NONE	NONE	NONE	NONE	0	0	0	0	0	0	0	0	0	0	0		NONE	NONE
00-91-27-22	20 mg qPM	20	49	female	70	1.555	28.9492	NO	NKA	yes	43801	DVT	no			rivaroxaban	None	hypothyrodism	24	26	87	35.09	12.63	88	88.4722	NONE	NONE	NONE	NONE	NONE	0	0	0	0	0	0	0	1	0	0	0		NONE	NONE
00-25-69-31	rivaroxaban 20 mg / 1 tab(s) NG Tube Daily	20	49	M	70	1.6	27.3437	NO	NKA	Yes	NONE	Left ventricular thrombus and stroke from thrombo embolic phenomenon	None	None	None	Rivaroxaban	None	Stroke, epilepsy, head trauma	29	17	126	34.42	10.02	117	66.5432	None	None	None	None	None	0	0	0	0	0	1	1	0	0	1	1		NONE	NONE
00-27-84-72	rivaroxaban 20 mg/ 1 tab(s) Oral Daily	20	49	F	75	1.542	31.5422	NO	NKA	NO	NONE	NONE	NONE	NONE	NONE	RIVA	NO	DM , PAFIB	35	14	99	34	12	85	98.1373	NONE	NONE	NONE	NONE	NONE	0	0	0	0	0	1	0	0	1	1	0		NONE	NONE
00-75-00-48	rivaroxaban 20 mg/ 1 tab(s) Oral Daily	20	49	M	127	1.81	38.7656	NO	BANANA, EGG	NO	NONE	NONE	NONE	NONE	NONE	RIVA	ASA	PAFIB. HTN	35	14	99	34	12	85	166.179	NONE	NONE	NONE	NONE	NONE	0	0	0	0	0	1	0	0	0	0	0		NONE	NONE
00-79-98-04	rivaroxaban 20 mg/ 1 tab(s) Oral Daily	20	49	M	62	1.7	21.4533	NO	JELLY	NO	NONE	NONE	NONE	NONE	NONE	RIVA	NO	DVT, SEIZURE, HTN, BOWEL RESECTION	8	11	137	28.15	10.24	132	52.2407	NONE	NONE	NONE	NONE	NONE	0	0	0	0	0	1	0	0	0	0	0		NONE	NONE
00-18-20-37	rivaroxaban 20 mg/ 1 tab(s) Oral Daily	20	49	F	54.8	1.488	24.75	NO	NUTS	Yes	2018	DVT	NONE	NONE	NONE	RIVA	ASA	DVT, PORTAL VEIN THROMBOSIS, MENORRHAGIA, MOLAR PREGNANCY	24	17	87	35.4	4.53	48	126.979	NONE	NONE	NONE	NONE	NONE	0	0	0	0	0	0	0	0	0	0	0		NONE	NONE
00-24-45-76	rivaroxaban 20 mg/ 1 tab(s) Oral Daily	20	49	F	88	1.6	34.375	NO	NKA	Yes	?	DVT	NONE	NONE	NONE	RIVA	ASA	SLE, MYSTHENIA GRAVIS, PROVOKED DVT	14	18	57	36.04	6.12	54	181.251	NONE	NONE	NONE	NONE	NONE	0	0	0	0	0	0	0	0	0	0	0		NONE	NONE
00-77-25-61	rivaroxaban 20 mg/ 1 tab(s) Oral Daily	20	49	F	105	1.68	37.2024	NO	NKA	NO	NONE	NONE	NONE	NONE	NONE	RIVA	NO	OA, PE ONE YEAR AGO, CHOLECYSTECTOMY,IDA, GASTRIC BANDING	21	13	72	32.52	4.4	69	169.251	NONE	NONE	NONE	NONE	NONE	0	0	0	0	0	0	0	0	0	0	0		NONE	NONE
00-12-08-11	rivaroxaban 20 mg/ 1 tab(s) Oral Daily	20	49	M	169	1.65	62.0753	NO	NKA	Yes	MULTIPLE	DVT	NONE	NONE	NONE	RIVA	NO	FACTOR 5 MUTATION AND PROTEIN C AND S DEFEIC, ON RIVA. HX OF MULTIPLE DVT ATTACKS, 8 IN RIGHT LEG, ONE IN LFT LEG AND ONE IN RT. ARM	35	14	99	34	12	85	221.136	NONE	NONE	NONE	NONE	NONE	0	0	0	0	0	0	0	0	0	0	0		NONE	NONE
10-15-16-49	15 mg BID for 21 days then 20 mg oraly daily	30	49	male	77	1.77	24.5779	NO	NKA	yes		DVT	no			rivaroxiban	None	DM,DVT	33	14	64	41.48	8.19	66	129.759	NONE	NONE	NONE	NONE	NONE	0	0	0	0	0	0	0	0	0	0	1		NONE	NONE
10-11-71-39	10 mg orally qpm	10	50	female	68.4	1.59	27.0559	NO	NKA	yes		portal vein thrombus	no			rivaroxiban	None	DM,PORTAL VEIN THROMBUS	41	28	82	38.16	16.1	90	83.6	NONE	NONE	NONE	NONE	NONE	0	0	0	0	0	1	1	0	0	0	1		NONE	NONE
00-88-92-60	10 mg, Oral, Daily	10	50	female	83.3	1.62	31.7406	NO	NKA	yes		PE	no			rivaroxaban	None	DM, HTN, DLD	51	36	123	38.1	8.49	48	190.896	NONE	NONE	NONE	NONE	NONE	0	0	0	0	0	1	1	0	0	0	1		NONE	NONE
00-29-52-37	rivaroxaban 10 mg/ 1 tab(s) Oral Daily	10	50	F	74	1.58	29.6427	NO	NKA	NO	NONE	NONE	NONE	NONE	NONE	RIVA	NO	HALLUX RIGIDUS, DLD, TRAUMATIC ARTHRITIS IN 2016, HISTORY OF TRAUMATIC FRACTURE OF SMALL FOOT	35	14	99	34	12	85	95.7647	NONE	NONE	NONE	NONE	NONE	0	0	0	0	0	0	1	0	0	0	0		NONE	NONE
00-89-41-42	, 15 mg, Oral, qPM	15	50	male	105.5	1.785	33.1113	yes	NKA	yes		LEFT ORCHALGIA AND ? LEFT THROMBOSED SPERMATIC VEINS	no			rivaroxaban	aspirin, 81 mg, Oral, Daily, clopidogrel, 75 mg, Oral, Daily	DLD, Hyperuricemia, VTEs	39	25	111	43.73	16.11	84	138.155	NONE	NONE	NONE	NONE	NONE	0	0	0	0	0	0	1	0	0	0	0		NONE	NONE
00-22-08-41	rivaroxaban 15 mg / 1 tab(s) Oral Daily	15	50	F	72	1.63	27.0993	NO	NKA	Yes	TWICE	DVT	NONE	NONE	NONE	RIVA	NO	RA DIAGNOSED 13 YEARS AGO, DVT LEFT LEG TWICE	43	34	105	34.75	6.62	52	152.308	NONE	NONE	NONE	NONE	NONE	0	0	0	0	1	0	0	0	0	0	0		NONE	NONE
00-52-57-63	rivaroxaban 15 mg / 1 tab(s) Oral Daily	15	50	F	72	1.63	27.0993	NO	NKA	NO	NONE	NONE	NONE	NONE	NONE	RIVA	NO	THROMBOSIS, RECURRENT DVT, SHE WAS ON WARF, AND RECENTLY SWITCHED TO RIVA	43	19	54	36.15	7.97	54	146.667	NONE	NONE	NONE	NONE	NONE	0	0	0	0	0	0	0	0	0	0	0		NONE	NONE
00-77-87-99	rivaroxaban 15 mg/ 1 tab(s) Oral Daily	15	50	F	87	1.64	32.3468	NO	NKA	NO	NONE	NONE	NONE	NONE	NONE	RIVA	ASA	CVA, LT HIGH INTERNAL CAROTID PSEUDO ANEURYSM	16	14	99	35.2	4.65	64	149.531	NONE	NONE	NONE	NONE	NONE	0	0	0	0	0	0	0	0	0	0	0		NONE	NONE
01-19-22-38	20 mg daily	20	50	female	80	1.6	31.25	NO	banana	no			None			rivaroxaban	None		35	14	99	34	12	85	103.529	NONE	NONE	NONE	NONE	NONE	0	0	0	0	0	1	0	0	0	1	1		NONE	NONE
10-18-88-32	20 mg daily	20	50	female	88.6	1.55	36.8783	NO	NKA	yes		portal vein throbus	no			rivaroxaban	None	DM, Liver abscess, DVT	15	74	179	24.56	9.93	31	314.387	NONE	NONE	NONE	NONE	NONE	0	0	0	0	0	0	0	0	0	0	1		NONE	NONE
10-24-50-42	20 mg daily	20	50	male	134	1.79	41.8214	NO	NKA	no			no			rivaroxaban	None	Arrhythmia, Severe LVSD, HTN, Post CRTD insertion	21	16	70	34.8	5.97	85	173.412	NONE	NONE	NONE	NONE	NONE	0	0	0	0	0	1	0	0	0	1	0		NONE	NONE
01-15-82-16	20 mg daily	20	50	male	83.9	1.61	32.3676	yes	NKA	no			no			rivaroxiban	None	Bilateral renal infarction,	26	12	92	33	3.43	115	80.2522	NONE	NONE	NONE	NONE	NONE	0	0	0	0	0	0	0	0	0	0	0		NONE	NONE
10-08-71-89	20 mg daily	20	50	female	76.7	1.55	31.9251	NO	NKA	yes	29/8/2016	portal vein, intrahepatic veins and superior mesenteric vein thrombosis	no			rivaroxaban	None	HTN, DM, laparoscopic sleeve gastrectomy, VTE, BA	27	16	130	31.63	8.98	58	145.466	NONE	NONE	NONE	NONE	NONE	0	0	0	0	0	0	0	0	0	0	0		NONE	NONE
10-22-57-16	20 mg daily	20	50	female	115.7	1.61	44.6356	NO	NKA	yes		PROVOKED LOWER LIMB DVT	no			rivaroxaban	None	metatarsal fracture, DVT	62	28	81	38.08	6.56	69	184.449	NONE	NONE	NONE	NONE	NONE	0	0	0	0	0	0	0	0	0	0	0		NONE	NONE
10-04-81-22	20 mg daily	20	50	male	104	1.68	36.8481	NO	NKA	yes		DVT	no			rivaroxaban	None	DM, HTN, Fatty liver, DVT	43	23	49	41	5.86	126	90.7937	NONE	0.32	NONE	NONE	NONE	0	0	0	0	0	0	0	0	0	0	0		NONE	NONE
10-22-73-10	20 mg daily	20	50	male	70	1.68	24.8016	NO	NKA	yes		DVT	no			rivaroxaban	None	hemiplegia, wernicke's aphasia, neurogenic bladder, fecal incontinince, seizure, DVT	21	7	80	36.94	3.71	53	145.283	NONE	NONE	NONE	NONE	NONE	0	0	0	0	0	0	0	0	0	0	0		NONE	NONE
00-87-15-90	20 mg oral tablet, 1 tab(s), Oral, qPM	20	50	female	92	1.515	40.0832	NO	all fruits	no			no			rivaroxaban	None	breast cancer	33	27	107	36.16	17.54	51	198.431	NONE	NONE	NONE	NONE	NONE	0	0	0	0	0	0	0	0	0	0	0		NONE	NONE
10-11-76-56	20 mg orally daily	20	50	male	87.3	1.71	29.8553	NO	NKA	yes		DVT	no			rivarixiban	None	SLE,DVT,HERPES ZOSTER,HYPERLIPIDEMIA	24	14	62	40.46	16.59	100	96.03	NONE	NONE	NONE	NONE	NONE	0	0	0	0	0	1	0	0	0	0	0		NONE	NONE
00-29-21-73	rivaroxaban 20 mg Oral Daily	20	50	F	68	1.57	27.5873	NO	NKA	Yes	2019	DVT	NONE	NONE	NONE	RIVA	NO	BRAC 1 + 2 POSITIVE , THROMBUS IN LEFT GONADAL VEIN AND SMALL ENHANCING LESION IN SEGMENT VIII	21	15	71	34.67	3.98	52	143.846	NONE	NONE	NONE	NONE	NONE	0	0	0	0	0	0	0	0	0	0	0		NONE	NONE
00-81-61-67	rivaroxaban 20 mg/ 1 tab(s) Oral Daily	20	50	M	111	1.66	40.2816	NO	NKA	NO	NONE	NONE	NONE	NONE	NONE	RIVA	NO	DM, HTN, AFIB ON WARFARIN DIASTOLIC HF, OSA	35	14	99	34	12	85	143.647	NONE	NONE	NONE	NONE	NONE	0	0	0	0	0	1	0	1	1	0	1		NONE	NONE
00-16-03-13	rivaroxaban 20 mg/ 1 tab(s) Oral Daily	20	50	F	78	1.61	30.0914	NO	NKA	Yes	?	DVT	NONE	NONE	NONE	RIVA	ASA	DVT, DLD, DM , ANEXIETY	25	18	50	37.43	4.39	45	190.667	NONE	NONE	NONE	NONE	NONE	0	0	0	0	0	1	0	0	0	0	1		NONE	NONE
00-08-89-98	rivaroxaban 20 mg/ 1 tab(s) Oral Daily	20	50	F	59	1.51	25.8761	NO	NKA	Yes	POST SURGERY 2019	DVT	NONE	NONE	NONE	RIVA	NO	DM, HTN, DLD, BA, LEEVE GASTRECTOMY	21	16	47	29.27	6.03	41	158.293	NONE	NONE	NONE	NONE	NONE	0	0	0	0	0	1	0	0	0	0	1		NONE	NONE
00-10-22-46	rivaroxaban 20 mg/ 1 tab(s) Oral Daily	20	50	F	93	1.62	35.4367	NO	NKA	NO	NONE	NONE	NONE	NONE	NONE	RIVA	ASA	HTN, HYPOTHYROIDISM, EMBELCTOMY OF LEFT UPPER LIMB VESSEL DUE TO AXILLARY EMBOLISM (18-5-2017) AND CEREBREAL STROKE 25-5-2017	30	14	115	36	6.35	59	173.39	NONE	NONE	NONE	NONE	NONE	0	0	0	0	0	0	0	1	0	0	0		NONE	NONE
00-00-66-50	rivaroxaban 20 mg/ 1 tab(s) Oral Daily	20	50	F	108.7	1.64	40.4149	NO	NKA	NO	NONE	NONE	NONE	NONE	NONE	RIVA	NO	DVT, HYPOTHYROIDISM, LEFT KNEE PAIN	35	14	98	35.12	12	59	202.661	NONE	NONE	NONE	NONE	NONE	0	0	0	0	0	1	1	0	0	0	0		NONE	NONE
00-68-35-02	rivaroxaban 20 mg/ 1 tab(s) Oral Daily	20	50	M	132	1.76	42.6136	NO	NKA	NO	NONE	NONE	NONE	NONE	NONE	RIVA	ASA	DLD, OBESITY, HX OF DVT IN LT LEG 20 YEARS AGO TREATED AND CURRENTLY ON ASA	31	15	91	36.81	15.49	62	234.194	NONE	NONE	NONE	NONE	NONE	0	0	0	0	0	0	1	0	0	0	0		NONE	NONE
00-24-65-79	rivaroxaban 20 mg/ 1 tab(s) Oral Daily	20	50	M	96.8	1.8	29.8765	NO	NKA	NO	NONE	NONE	NONE	NONE	NONE	RIVA	NO	AFIB	35	14	99	34	12	85	125.271	NONE	NONE	NONE	NONE	NONE	0	0	0	0	0	0	0	0	0	0	0		NONE	NONE
00-26-13-87	rivaroxaban 20 mg/ 1 tab(s) Oral Daily	20	50	F	99.5	1.52	43.0661	NO	NKA	Yes	2016, 2003	DVT	NONE	NONE	NONE	RIVA	NO	IDA, HISTORY OFUNPROVOKED LL DVT 2016, DVT 2003 AFTER HORMONAL TREATMENT FOR IVF	23	16	68	33.3	7.87	65	168.385	NONE	NONE	NONE	NONE	NONE	0	0	0	0	0	0	0	0	0	0	0		NONE	NONE
00-36-00-85	rivaroxaban 20 mg/ 1 tab(s) Oral Daily	20	50	F	86	1.6	33.5937	NO	NKA	Yes	RECURRENT	DVT	NONE	NONE	NONE	RIVA	NO	RECURRENT DVT	29	19	102	34.62	6.6	84	112.619	NONE	NONE	NONE	NONE	NONE	0	0	0	0	0	0	0	0	0	0	0		NONE	NONE
00-48-53-72	rivaroxaban 20 mg/ 1 tab(s) Oral Daily	20	50	F	86.4	1.53	36.9089	NO	NKA	Yes	2013	DVT, PE	NONE	NONE	NONE	RIVA	NO	BILATERAL EXTENSIVE DVT, AND BILATERAL PE 9 YEARS AGO POST PARTUM, PERSISTANT PROTEIN S AND C DEFECIENCY	22	12	53	36.64	6.91	65	146.215	NONE	NONE	NONE	NONE	NONE	0	0	0	0	0	0	0	0	0	0	0		NONE	NONE
01-09-95-67	10 mg daily	10	51	female	100	1.58	40.0577	NO	NKA	no			no			rivaroxaban	None	TKR,	21	20	178	34.56	4.05	50	217.556	NONE	NONE	NONE	NONE	NONE	0	0	0	0	0	1	0	0	0	1	1		NONE	NONE
10-25-25-17	10 mg daily	10	51	female	65.5	1.54	27.6185	NO	NKA	no			no			rivaroxaban	None	knee pain, DM, DLD, HTN, hysterectomy, TKR	25	23	121	42.26	5.44	51	139.705	NONE	NONE	NONE	NONE	NONE	0	0	0	0	0	1	1	0	0	0	1		NONE	NONE
00-97-57-24	10 mg daily	10	51	female	64	1.535	27.1621	NO	NKA	no			no			rivaroxaban	None		18	11	71	35.25	5.17	71	98.0532	NONE	NONE	NONE	NONE	NONE	0	0	0	0	0	1	0	0	0	0	1		NONE	NONE
10-21-63-19	10 mg daily	10	51	female	42.45	1.45	20.1902	NO	NKA	no			no			rivaroxaban	None	RA, HIP PAIN	49	36	121	25.02	6.77	41	112.625	NONE	NONE	NONE	NONE	NONE	0	0	0	0	1	0	0	0	0	0	0		NONE	NONE
10-05-98-48	10 mg daily	10	51	male	96.8	1.725	32.531	NO	NKA	yes		DVT	no			rivaroxaban	None	DLD, impaired vision	28	13	94	41.93	9.5	74	142.293	NONE	NONE	NONE	NONE	NONE	0	0	0	0	0	0	0	0	0	0	0		NONE	NONE
10-16-17-60	10 mg oral daily	10	51	female	84	1.545	35.1902	NO	NKA	no			no			rivaroxiban	None	TKR	27	19	80	30.34	3.82	44	207.667	NONE	NONE	NONE	NONE	NONE	0	0	0	0	0	0	0	0	0	0	0		NONE	NONE
00-61-35-04	rivaroxaban 10 mg/ 1 tab(s) Oral Daily	10	51	F	94.6	1.53	40.4118	NO	CORTISONE, PLASIL	NO	NONE	NONE	NONE	NONE	NONE	RIVA	NO	DM, HTN , TKE, OBESITY	27	25	81	31.47	8.3	59	174.413	NONE	NONE	NONE	NONE	NONE	0	0	0	0	0	1	0	0	0	0	1		NONE	NONE
00-37-10-19	rivaroxaban 10 mg/ 1 tab(s) Oral Daily	10	51	F	90	1.58	36.0519	NO	NKA	Yes	?	DVT	NONE	NONE	NONE	RIVA	NO	DLD, HX OF DVT OFF TREATMENT	43	21	99	37.23	5.58	53	184.717	NONE	NONE	NONE	NONE	NONE	0	0	0	0	0	0	1	0	0	0	0		NONE	NONE
00-29-45-96	rivaroxaban 10 mg/ 1 tab(s) Oral Daily	10	51	F	84	1.6	32.8125	NO	NKA	Yes	RECURRENT	DVT	NONE	NONE	NONE	RIVA	NO	CROHN,S DISEASE , RECURRENT DVT	29	28	117	30.77	6.55	58	157.54	NONE	NONE	NONE	NONE	NONE	0	0	0	1	0	0	0	0	0	0	0		NONE	NONE
00-63-65-23	rivaroxaban 10 mg/ 1 tab(s) Oral Daily	10	51	F	99	1.55	41.2071	NO	NKA	Yes	2013	DVT	NONE	NONE	NONE	RIVA	ASA	LEFT UPPER ARM DVT IN 2013, SHE WAS ON WARFARIN 6 MONTHS THEN FOLLOWED BY RIVARO.THEN SHE HAD ANOTHER DVT IN 2016	30	21	87	36.99	6.37	55	195.8	NONE	NONE	NONE	NONE	NONE	0	0	0	0	0	0	0	0	0	0	0		NONE	NONE
10-09-98-39	15 mg daily	15	51	male	76	1.76	24.5351	NO	NKA	yes		Left ilio-femoral DVT	no			rivaroxaban	None	DVT, Obstructive Uropathy, Mid -back Mass, B-cell lymphomaAbnormal behaviour, Febrile neutropenia	43	43	223	16	14.98	54	153.095	NONE	NONE	NONE	NONE	NONE	0	0	0	0	0	0	0	0	0	0	0		NONE	NONE
10-18-90-58	15 mg daily	15	51	female	67	1.43	32.7644	NO	NKA	no			yes		PAF	rivaroxaban	None	RHD, Afib, Post mini MVR	34	30	85	39.86	10.74	73	99.8371	NONE	NONE	NONE	NONE	NONE	0	0	0	0	0	0	0	0	0	0	0		NONE	NONE
00-47-40-15	rivaroxaban 15 mg / 1 tab(s) Oral Daily	15	51	F	93	1.65	34.1598	NO	NKA	Yes	?	DVT	NONE	NONE	NONE	RIVA	NO	DVT	48	44	65	29.09	13.71	54	187.34	NONE	NONE	NONE	NONE	NONE	0	0	0	0	0	0	0	0	0	0	0		NONE	NONE
10-09-44-79	20 mg daily	20	51	female	101.2	1.54	42.6716	NO	NKA	no			no			rivaroxaban	None	billateral CSOM, left ear surgeries twise, CVA	35	14	99	34	12	32	344.01	NONE	NONE	NONE	NONE	NONE	0	0	0	0	0	1	1	0	0	1	1		NONE	NONE
02-35-53-57	20 mg daily	20	51	male	118	1.78	37.2428	NO	NKA	no			yes			rivaroxaban	aspirin, 81 mg, Oral, Daily	HTN, DM, Afib, DLD, GERD, OA, Hyperkeratosis	20.9	16.1	115	42.8	17	100	128.358	NONE	NONE	NONE	NONE	NONE	0	0	0	0	0	1	1	0	0	0	1		NONE	NONE
10-06-21-52	20 mg daily	20	51	female	64	1.61	24.6904	NO	NKA	yes		LL Rt DVT	no			rivaroxaban	None	IDA, DVT	17	12	52	34.38	7.15	54	128.922	NONE	NONE	NONE	NONE	NONE	0	0	0	0	0	0	0	0	0	0	1		NONE	NONE
10-07-41-26	20 mg daily	20	51	male	87	1.71	29.7527	NO	NKA	no			yes			rivaroxaban	None	Afib	46	59	86	40.46	8.21	88	107.542	NONE	NONE	NONE	NONE	NONE	0	0	0	0	0	0	0	0	0	0	1		NONE	NONE
02-53-81-27	20 mg daily	20	51	female	54	1.59	21.3599	NO	NKA	yes		PE, DVTs	no			rivaroxaban	None	SLE, HTN, DM, APS, DVT, PE	35	14	99	34	12	85	69.1059	NONE	NONE	NONE	NONE	NONE	0	0	0	0	0	1	0	0	1	0	0		NONE	NONE
10-19-39-48	20 mg daily	20	51	female	86	1.63	32.3685	NO	egg, banana, honey	yes	43230	descending aortic thrombus	no			rivaroxaban	Aspirin 81mg	HTN, Right popliteal embolectomy	28	23	77	38.19	2.81	56	167.052	NONE	NONE	NONE	NONE	NONE	0	0	0	0	0	1	0	0	0	0	0		NONE	NONE
10-07-19-54	20 mg daily	20	51	male	73	1.59	28.8754	no	NKA	yes	42618	arterial extensive thrombosis	no			rivaroxaban	aspirin, 81 mg, Oral, Daily	HTN, DM, DLD,critical limb ischmia	27	0	0	42.1	18.39	96	82.7164	NONE	NONE	NONE	NONE	NONE	0	0	0	0	0	1	0	0	0	0	0		NONE	NONE
10-02-64-24	20 mg daily	20	51	female	110	1.61	42.4366	NO	NKA	yes		DVT	no			rivaroxaban	None	DVT, MVA, Tachycardia	21	17	113	36	5.18	51	234.619	NONE	1.1	NONE	NONE	NONE	0	0	0	0	0	0	0	0	0	0	0		NONE	NONE
10-06-39-08	20 mg daily	20	51	female	116	1.68	41.0998	NO	contrast media (iodine-based)	yes	43678	PE	no			rivaroxaban	None	HYPOTHYROIDISM, HTN, DM, rectal Ca	27	16	104	39.79	12.36	60	210.304	NONE	NONE	NONE	NONE	NONE	0	0	0	0	0	0	0	0	0	0	0		NONE	NONE
01-00-42-53	20 mg daily	20	51	male	90	1.81	27.4717	NO	NKA	yes	23-4-2018	old DVT	no			rivaroxaban	None		30	24	58	41.4	5.03	85	115.176	NONE	NONE	NONE	NONE	NONE	0	0	0	0	0	0	0	0	0	0	0		NONE	NONE
10-20-59-47	20 mg daily	20	51	female	90.4	1.57	36.6749	NO	NKA	no			yes		PAF	rivaroxaban	None	RHD, valve surgery, Afib	77	51	305	26.8	8.49	68	144.61	NONE	NONE	NONE	NONE	NONE	0	0	0	0	0	0	0	0	0	0	0		NONE	NONE
10-16-28-81	20 mg oral daily	20	51	female	63	1.55	26.2227	NO	NKA	yes		DVT	no			rivaroxiban	None	T2DM. BA.Diagnosed INVASIVE Ductal Carcinoma	46	27	83	40.46	5.28	66	103.833	NONE	NONE	NONE	NONE	NONE	0	0	0	0	0	0	0	0	0	0	0		NONE	NONE
01-17-44-92	20 mg oral qpm	20	51	male	73	1.7	25.2595	NO	NKA	yes		DVT	YES		A-fib	rivaroxiban	None	DVT,A-FIB,TIA	26	16	57	35.34	8.98	84	94.5331	NONE	NONE	NONE	NONE	NONE	0	0	0	0	0	1	0	0	0	0	1		NONE	NONE
10-14-04-73	20 mg oral tablet, 1 tab(s), Oral, qPM	20	51	male	90	1.79	28.089	smoker,drug abuse, alcohol ingestion	NKA	no			no			rivaroxiban	None	upper limb ischemia,HTN	59	64	99	33.62	5.61	104	94.1346	NONE	NONE	NONE	NONE	NONE	0	0	0	0	0	1	0	0	0	1	0		NONE	NONE
10-12-27-91	20 mg oral tablet, 1 tab(s), Oral, qPM	20	51	male	65	1.78	20.5151	NO	NKA	yes		DVT	no			rivaroxiban	aspirin 81 mg	SOB,DVT	15	14	99	37.2	6.08	81	87.2908	NONE	NONE	NONE	NONE	NONE	0	0	0	0	0	0	0	0	0	0	0		NONE	NONE
10-25-10-63	rivaroxaban 20 mg/ 1 tab(s) Oral Daily	20	51	F	77.95	1.58	31.225	NO	NKA	NO	NONE	NONE	NONE	NONE	NONE	Rivaroxaban	NONE	AFIB, DYSPNEA ON EXERTION, RHEUMATIC MITRAL STENOSIS, REPLACEMENT OF AORTIC VALVE WITH BIOPROTHESIS	26	18	76	35.57	6.06	63	134.591	None	None	None	None	None	0	0	0	0	0	1	1	0	0	1	1		NONE	NONE
00-58-73-55	rivaroxaban 20 mg/ 1 tab(s) Oral Daily	20	51	F	81.4	1.565	33.235	NO	NKA	Yes	?	PE	NONE	NONE	NONE	RIVA	NO	DM , HTN, GERD, DLD, HX OF PE	36	20	110	36.09	4.52	50	177.09	NONE	NONE	NONE	NONE	NONE	0	0	0	0	0	1	1	0	0	0	1		NONE	NONE
00-21-57-90	rivaroxaban 20 mg/ 1 tab(s) Oral Daily	20	51	M	88	1.69	30.8112	NO	NKA	NO	NONE	NONE	NONE	NONE	NONE	RIVA	ASA/ CLOPIDOGRIL	DM, HTN, MV REPAIR 2018, AFIB	38	21	73	36.71	7.3	73	131.129	NONE	NONE	NONE	NONE	NONE	0	0	0	0	0	1	0	0	0	0	1		NONE	NONE
00-65-29-11	rivaroxaban 20 mg/ 1 tab(s) Oral Daily	20	51	F	84.5	1.512	36.9618	NO	NKA	NO	NONE	NONE	NONE	NONE	NONE	RIVA	ASA	IMMUNE THROMBOCYTOPENIA ITP, CEREBRAL VENOUS THROMBOSIS, IDA	21	15	107	37.42	5.59	54	170.217	NONE	NONE	NONE	NONE	NONE	0	0	0	0	0	0	0	0	0	0	0		NONE	NONE
00-03-62-25	rivaroxaban 20 mg/ 1 tab(s) Oral Daily	20	51	F	71	1.59	28.0843	NO	ASA	NO	NONE	NONE	NONE	NONE	NONE	RIVA	NO	BA, POST GASTRIC SLEEVE	22	18	91	37.08	7.82	69	111.931	NONE	NONE	NONE	NONE	NONE	0	0	0	0	0	0	0	0	0	0	0		NONE	NONE
00-13-34-85	rivaroxaban 20 mg/ 1 tab(s) Oral Daily	20	51	M	114	1.75	37.2245	NO	NKA	NO	NONE	NONE	NONE	NONE	NONE	RIVA	NO	STAGE 3B HODGKIN DISEASE,	33	20	60	31.5	6.56	108	114.821	NONE	NONE	NONE	NONE	NONE	0	0	0	0	0	0	0	0	0	0	0		NONE	NONE
00-63-00-25	rivaroxaban 20 mg/ 1 tab(s) Oral Daily	20	51	M	88	1.69	30.8112	NO	NKA	Yes	2019	DVT	NONE	NONE	NONE	RIVA	NO	ACUTE PROVOKED DVT, TKR	47	24	46	41.23	12.83	96	99.713	NONE	NONE	NONE	NONE	NONE	0	0	0	0	0	0	0	0	0	0	0		NONE	NONE
00-83-46-61	rivaroxaban 20 mg/ 1 tab(s) Oral Daily	20	51	M	94.7	1.706	32.5381	NO	NKA	Yes	RECURRENT	DVT	NONE	NONE	NONE	RIVA	NO	RECURRENT DVT, URETHRAL STRICTURE	23	15	69	40.46	18	84	122.634	NONE	NONE	NONE	NONE	NONE	0	0	0	0	0	0	0	0	0	0	0		NONE	NONE
10-06-20-83	10 mg daily	10	52	female	90	1.8	27.7778	NO	NKA	no			no			rivaroxaban	None	PPMS	27	12	61	34	4.44	66	146.667	NONE	NONE	NONE	NONE	NONE	0	0	0	0	0	1	1	0	0	0	1		NONE	NONE
10-11-92-75	10 mg orally qpm for 14 days	10	52	female	102.9	1.68	36.4583	NO	NKA	no			no			rivaroxiban	None	left ankle fracture	33	17	81	34.66	7.32	60	184.458	NONE	NONE	NONE	NONE	NONE	0	0	0	0	0	1	0	0	0	0	0		NONE	NONE
00-13-71-43	rivaroxaban 10 mg Oral Daily	10	52	F	90	1.55	37.461	NO	ATROPHINE, PARACETAMOL, SUCCINYLCHOLINE, TRACRIUM	NO	NONE	NONE	NONE	NONE	NONE	RIVA	NO	JUVENILE IDIOPATHIC ARTHRITIS DIAGNOSED WHEN SHE WAS 10 Y.O. BILATERAL TKR IN MARCH 2019, RIVA WAS NOT FROM THE CURRENT PATIENT MEDICATION	23	12	81	36.21	7.37	47	205.957	NONE	NONE	NONE	NONE	NONE	0	0	0	0	0	0	0	0	0	0	0		NONE	NONE
00-24-35-52	rivaroxaban 10 mg/ 1 tab(s) Oral Daily	10	52	F	102.7	1.53	43.872	NO	NKA	NO	NONE	NONE	NONE	NONE	NONE	RIVA	NO	TKR,	35	14	99	34	12	85	129.952	NONE	NONE	NONE	NONE	NONE	0	0	0	0	0	0	0	0	0	0	0		NONE	NONE
00-24-39-88	rivaroxaban 10 mg/ 1 tab(s) Oral Daily	10	52	M	113	1.81	34.4922	NO	NKA	Yes	?	PORTAL VEIN THROMBOSIS	NONE	NONE	NONE	RIVA	NO	PORTAL VEIN THROMBOSIS, POLYCYTHEMIA VERA , HYPERTENSIVE GASTROPATHY, PORTAL HYPERTENSION AND ESOPHAGEAL VARICES, GILBERT SYNDROME	45	40	76	36.9	60.4	73	166.49	NONE	NONE	NONE	NONE	NONE	0	0	0	0	0	0	0	0	0	0	0		NONE	NONE
00-42-85-06	rivaroxaban 10 mg/ 1 tab(s) Oral Daily	10	52	M	86	1.65	31.5886	NO	NKA	Yes	JUNE, 2018	DVT	NONE	NONE	NONE	RIVA	NO	DVT	26	14	99	35.8	5.15	88	105.111	NONE	NONE	NONE	NONE	NONE	0	0	0	0	0	0	0	0	0	0	0		NONE	NONE
00-13-99-71	rivaroxaban 15 mg / 1 tab(s) Oral Daily	15	52	F	200	1.61	77.1575	NO	NKA	Yes	?	DVT	NONE	NONE	NONE	RIVA	NO	HTN, DLD, T2DM, DVT	18	15	58	37.12	7.8	54	398.354	NONE	NONE	NONE	NONE	NONE	0	0	0	0	0	0	1	0	0	0	1		NONE	NONE
00-48-77-24	rivaroxaban 15 mg / 1 tab(s) Oral Daily	15	52	M	91.6	1.7	31.6955	NO	INDAPAMIDE	NO	NONE	NONE	NONE	NONE	NONE	RIVA	NO	NO CLEAR REASON FOR USING OF RIVARO, 2018, SCHIZOPHRENIA, IBS, DLD, HTN, CONSTIPATION	34	18	82	43.24	12.35	83	118.7	NONE	NONE	NONE	NONE	NONE	0	0	0	0	0	1	1	0	0	0	0		NONE	NONE
00-31-77-27	rivaroxaban 15 mg / 1 tab(s) Oral Daily	15	52	M	65	1.68	23.03	NO	NKA	Yes	2009, 2015	DVT	NONE	NONE	NONE	RIVA	NO	BAHCET,S DISEASE, DVT 2 TIMES 2009-2015	22	20	78	37.63	9.02	94	74.3735	NONE	NONE	NONE	NONE	NONE	0	0	0	0	0	0	0	0	0	0	0		NONE	NONE
00-15-68-13	rivaroxaban 15 mg / 1 tab(s) Tab Oral Qpm	15	52	F	53.5	1.55	22.2685	NO	TRAMADOL	NO	NONE	NONE	NONE	None	None	Rivaroxaban	None	HTN, AFIB, HYPOTHYROIDISM, SCA, IRON OVERLOAD ERCP+STENT 2 YEARS AGO	27	47	86	34.04	31.08	109	52.791	None	None	None	None	None	0	0	0	0	0	1	0	0	1	1	1		NONE	NONE
00-76-50-69	rivaroxaban 15 mg/ 1 tab(s) Oral Daily	15	52	F	105.2	1.64	39.1136	NO	BANANA, CHOCOLATE, CORTISOL, EGG CONTAINING COMPOUND, STRABERRY , HYDROCORTISONE	NO	NONE	NONE	NONE	NONE	NONE	RIVA	ASA	HTN, MIGRAIN, PAROX, AFIB, LV DIASTOLIC DYSFUNCTION, PULMONARY HTN, MORBID OBESITY, BA	22	10	46	31.5	17.22	46	245.975	NONE	NONE	NONE	NONE	NONE	0	0	0	0	0	0	0	0	0	1	0		NONE	NONE
00-08-06-69	rivaroxaban 15 mg/ 1 tab(s) Oral Daily	15	52	M	80	1.65	29.3848	NO	NKA	NO	NONE	NONE	NONE	NONE	NONE	RIVA	NO	VSD, AFIB, HTN, CHF, SEVERE PULM, HTN, RECENT STROKE IN 2018WITH RESIDUAL RT SIDE HEMIPLEGIA	35	14	99	34	12	85	101.229	NONE	NONE	NONE	NONE	NONE	0	0	0	0	0	0	0	0	0	1	0		NONE	NONE
10-22-45-68	20 mg daily	20	52	male	55.3	1.65	20.3122	NO	fish	no			no			rivaroxaban	None	CABG, DM, EF of 30% , Moderate to severe Global Hypokynesia, Multivessels disease	27	22	201	32.19	17.48	116	51.2743	NONE	NONE	NONE	NONE	NONE	0	0	0	0	0	1	0	0	1	0	1		NONE	NONE
10-17-16-50	20 mg daily	20	52	female	126	1.52	54.536	NO	NKA	yes		RIGHT LOWER LIMB DVT	no			rivaroxiban	None	DM, HTN, HEMORRHAGIC STROKE, DVT	43	26	150	33.58	2.42	70	193.6	NONE	NONE	NONE	NONE	NONE	0	0	0	0	0	1	0	0	0	0	1		NONE	NONE
01-04-69-59	20 mg daily	20	52	female	76	1.528	32.5512	NO	NKA	yes		PE	no			rivaroxaban	None	PE	18	18	105	32.76	4.21	54	151.374	NONE	NONE	NONE	NONE	NONE	0	0	0	0	0	0	0	0	0	0	1		NONE	NONE
10-19-35-90	20 mg daily	20	52	male	71.7	1.68	25.4039	NO	NKA	yes		septic lung emboli	no			rivaroxaban	None	DM, septic lung emboli, Fournier gangrene	41	25	67	37.91	22.94	63	122.408	NONE	NONE	NONE	NONE	NONE	0	0	0	0	0	0	0	0	0	0	1		NONE	NONE
10-11-14-48	20 mg daily	20	52	female	100	1.59	39.5554	NO	NKA	yes	2017	unprovoked PE	no			rivaroxaban	aspirin, 81 mg, Oral, Daily	PE, stroke, Thrombophilia, HTN	32	19	83	36.71	5.79	44	244.444	NONE	NONE	NONE	NONE	NONE	0	0	0	0	0	1	0	0	0	1	0		NONE	NONE
10-00-34-65	20 mg daily	20	52	female	76.5	1.49	34.4579	NO	NKA	yes		PE, DVT	no			rivaroxaban	None	PE, total thyroidectomy	19	13	105	34.22	3.97	39	210.974	NONE	NONE	NONE	NONE	NONE	0	0	0	0	0	1	0	0	0	0	0		NONE	NONE
10-04-10-51	20 mg daily	20	52	female	72	1.53	30.7574	NO	NKA	yes	42339	DVT	no			rivaroxaban	aspirin, 81 mg, Oral, Daily	DM, DVT	35	14	99	34	12	85	91.1059	NONE	NONE	NONE	NONE	NONE	0	0	0	1	0	0	0	0	0	0	0		NONE	NONE
01-00-78-04	20 mg daily	20	52	male	103	1.78	32.5085	NO	NKA	no			yes	43647		rivaroxaban	None	HTN, Allergic Rhinitis, DM, AF	39	16	93	35.77	10.51	92	120.415	NONE	NONE	NONE	NONE	NONE	0	0	0	0	0	0	0	0	0	0	0		NONE	NONE
10-15-32-95	20 mg oral daily	20	52	male	74	1.72	25.0135	NO	NKA	yes		DVT	NO			rivaroxiban	None	DVT	12	9	177	37.18	10.28	66	120.593	NONE	NONE	NONE	NONE	NONE	0	0	0	0	0	0	0	0	0	0	0		NONE	NONE
10-11-85-52	20 mg oral tablet, 1 tab(s), Oral, qPM	20	52	female	94	1.52	40.6856	NO	NKA	no			yes		a-fib	rivaroxiban	None	HTN,DM,DCMP,IHD,AFIB	31	23	148	28.75	8.63	65	155.542	NONE	NONE	NONE	NONE	NONE	0	0	0	0	0	1	1	0	0	0	1		NONE	NONE
10-12-41-18	20 mg oral tablet, 1 tab(s), Oral, qPM	20	52	male	88	1.68	31.1791	NO	NKA	yes		DVT	NO			Rivaroxiban	None	DVT	29	14	99	39.7	4.06	80	118.311	NONE	NONE	NONE	NONE	NONE	0	0	0	0	0	1	0	0	0	0	1		NONE	NONE
10-13-74-28	20 mg oral tablet, 1 tab(s), Oral, qPM	20	52	female	88	1.63	33.1213	NO	heparin, tegaderm	no			yes		a-fib	rivaroxiban	None	afib,UPPER LIMB ABOVE ELBOW AMPUTATION	41	14	99	38.1	5.3	68	139.19	NONE	NONE	NONE	NONE	NONE	0	0	0	0	0	1	0	0	0	0	0		NONE	NONE
10-24-08-89	rivaroxaban 20 mg / 1 tab(s) Tab Oral Qpm	20	52	F	62	1.47	28.6917	NO	NKA	NO	NONE	NONE	None	None	None	Rivaroxaban	None	HTN, STROKE SINCE 1.5 YEARS AGO ON RIVAROXABAN, BA	17	14	71	24.8	6.91	91	73.2796	None	None	None	None	None	0	0	0	0	0	0	0	0	1	1	1		NONE	NONE
00-90-84-52	rivaroxaban 20 mg oral tablet, 1 tab(s), Oral, qPM	20	52	female	75.5	1.52	32.6783	NO	NKA	yes		Provoked Lt. DVT and PE	no			rivaroxaban	None	anxiety. Brast cancer	20	13	60	38.43	8.49	51	159.224	NONE	NONE	NONE	NONE	NONE	0	0	0	0	0	0	0	0	0	0	0		NONE	NONE
00-44-99-33	rivaroxaban 20 mg/ 1 tab(s) Oral Daily	20	52	M	101	1.76	32.6059	NO	NKA	Yes	2019	PE	NONE	NONE	NONE	RIVA	NO	PE, HTN, DM, HYPOTHYROIDISM	26	16	94	40	6.97	86	126.315	NONE	NONE	NONE	NONE	NONE	0	0	0	0	0	1	1	0	0	0	1		NONE	NONE
00-14-77-40	rivaroxaban 20 mg/ 1 tab(s) Oral Daily	20	52	F	117	1.56	48.0769	NO	NKA	NO	NONE	NONE	NONE	NONE	NONE	RIVA	NO	DM, HTN, BA, HYPERLIPIDEMIA, AFIB,	35	14	99	34	12	85	148.047	NONE	NONE	NONE	YES	NONE	0	0	0	0	0	0	1	0	0	0	1		NONE	NONE
00-42-00-74	rivaroxaban 20 mg/ 1 tab(s) Oral Daily	20	52	M	55	1.65	20.202	YES	NKA	NO	NONE	NONE	NONE	NONE	NONE	RIVA	CLOP	LT THROMBUS, T2DM, ANTERIOR STEMI POST PPCI...	35	14	99	34	12	85	69.5948	NONE	NONE	NONE	NONE	NONE	0	0	0	0	0	0	0	0	0	0	1		NONE	NONE
00-41-44-66	rivaroxaban 20 mg/ 1 tab(s) Oral Daily	20	52	F	62	1.58	24.8358	NO	IODINE CONTAINING COMPOUND, SHRIMP, PENICILLIN	NO	NONE	NONE	NONE	NONE	NONE	RIVA	NO	AFIB ON WARFARIN, STROKE TWICE 4 YEARS AGO (7 MONTHS APART), MIGRAIN HEADACHE, KIDNEY ATROPHY, DM	35	14	99	34	12	85	78.4523	NONE	NONE	NONE	NONE	NONE	0	0	0	0	0	1	1	0	1	1	0		NONE	NONE
00-79-66-71	rivaroxaban 20 mg/ 1 tab(s) Oral Daily	20	52	F	89	1.63	33.4977	NO	NKA	NO	NONE	NONE	NONE	NONE	NONE	RIVA	ASA	AFIB, HTN	22	16	106	38.57	11.16	80	119.656	NONE	NONE	NONE	NONE	NONE	0	0	0	0	0	1	0	0	0	0	0		NONE	NONE
00-22-13-09	rivaroxaban 20 mg/ 1 tab(s) Oral Daily	20	52	M	80.2	1.75	26.1878	NO	WARFARIN	Yes	?	DVT	NONE	NONE	NONE	RIVA	ASA	APS, DVT, PRIMARY APS WIT RECURRECT THROMBOSIS, ANEXIETY, IHD, GERD.	35	14	99	34	12	85	101.482	NONE	NONE	NONE	NONE	NONE	0	0	0	0	0	0	0	0	0	0	0		NONE	NONE
00-72-67-03	rivaroxaban15MG BID THEN 20 mg/ 1 tab(s) Oral Daily	20	52	F	84	1.475	38.6096	NO	NKA	NO	NONE	NONE	NONE	NONE	NONE	RIVA	NO	SVT, DVT, DLD, HTN,	38	43	95	23.67	8.27	64	141.167	NONE	NONE	NONE	NONE	NONE	0	0	0	0	0	1	1	0	0	0	0		NONE	NONE
10-21-91-14	10 mg daily	10	53	male	117	1.8	36.1111	NO	NKA	no			no			rivaroxaban	None	BA, left TKR	24	19	56	38.06	6.78	74	168.122	NONE	NONE	NONE	NONE	NONE	0	0	0	0	0	0	0	0	0	0	0		NONE	NONE
01-15-49-13	10 mg orally for 21 days	10	53	female	62	1.41	31.1856	NO	NKA	no			no			rivaroxiban	None	TKR	13	14	89	24.7	10.89	41	160.797	NONE	NONE	NONE	NONE	NONE	0	0	0	0	0	0	0	0	0	0	0		NONE	NONE
00-46-34-58	rivaroxaban 10 mg/ 1 tab(s) Oral Daily	10	53	F	96.3	1.61	37.1513	NO	NKA	Yes	2019	DVT, PE	NONE	NONE	NONE	RIVA	NO	CKD, NEPHROPATHY, HTN, RECURRENT VTE	16	15	83	30.53	6.2	89	115.055	NONE	NONE	NONE	NONE	NONE	0	0	0	0	0	0	0	0	1	0	0		NONE	NONE
01-20-62-43	15 mg daily	15	53	male	90.1	1.756	29.2197	NO	banana,melon and cantaloupe	yes		PE	no			rivaroxaban	None	colon cancer, PE	28	19	98	43.04	14.39	76	126.061	NONE	NONE	NONE	NONE	NONE	0	0	0	0	0	0	0	0	0	0	0		NONE	NONE
00-89-54-57	15 mg, Oral, qPM	15	53	male	92	1.47	42.5749	NO	NKA	no			yes			rivaroxaban	None	Hyperurecemia, HTN, DLD, Afib	17	25	32.13	188	8.97	117	83.6125	NONE	NONE	NONE	NONE	NONE	0	0	0	0	0	1	1	0	0	0	0		NONE	NONE
00-69-53-04	rivaroxaban 15 mg / 1 tab(s) Oral Daily	15	53	M	67.6	1.6	26.4062	NO	NKA	NO	NONE	NONE	None	None	None	Rivaroxaban	None	AFIB, PULMONARY HTN, CHRONIC POPLITEAL DVT, BRONCHIECTASIS, GOUTY ARTHRITIS, COPD, HF	20	30	72	31.12	23.37	73	98.4676	None	None	None	None	None	0	0	0	0	0	1	0	0	1	1	1		NONE	NONE
00-63-58-23	rivaroxaban 15 mg / 1 tab(s) Oral Daily	15	53	F	80.5	1.51	35.3055	NO	PENICILLIN, SULPHA	Yes	RECURRENT	DVT, PE	NONE	NONE	NONE	RIVA	NO	BA, AR, PE, GERD, DLD, IBS	24	15	105	35.34	4.08	55	155.633	NONE	NONE	NONE	NONE	NONE	0	0	0	0	0	0	1	0	0	0	0		NONE	NONE
01-14-26-67	20 mg od for 3 months	20	53	male	78	1.62	29.7211	no	NKA	yes		PE	no			rivaroxiban	None	angina	48	18	120	36	12.36	94	88.234	NONE	NONE	NONE	NONE	NONE	0	0	0	0	0	0	0	0	0	0	0		NONE	NONE
10-17-28-57	20 mg daily	20	53	female	96.4	1.44	46.4892	NO	NKA	yes	43160	PE	no			rivaroxiban	None	HTN, DM, PE, Organizing pneumonia	36	28	151	34.03	11.51	53	193.406	NONE	0.37	NONE	NONE	NONE	0	0	0	0	0	1	0	0	0	0	1		NONE	NONE
10-08-76-26	20 mg daily	20	53	male	135	1.75	44.0816	NO	NKA	no			yes			rivaroxaban	None	HTN, DM, HF with preserved EF, Afib	35	21	81	33.17	18.93	92	156.033	NONE	NONE	NONE	NONE	NONE	0	0	0	0	0	1	0	0	0	0	1		NONE	NONE
10-04-59-58	20 mg daily	20	53	female	58	1.64	21.5645	NO	NKA	yes		Massive PE, LL DVT	no			rivaroxaban	None	DM, SLE, PE, DVT	20	9	78	29.44	12.64	51	120.928	NONE	NONE	NONE	NONE	NONE	0	0	0	0	0	0	0	0	0	0	1		NONE	NONE
10-18-16-75	20 mg daily	20	53	female	55	1.484	24.9744	NO	NKA	yes		provoked DVT	no			rivaroxaban	None	IDA, DVT	16	11	98	38.19	10.29	54	108.302	NONE	0.4	NONE	NONE	NONE	0	0	0	0	0	0	0	0	0	0	0		NONE	NONE
10-05-67-34	20 mg daily	20	53	male	87.9	1.69	30.7762	NO	NKA	no			yes			rivaroxaban	None	AF, DM	60	26	79	36	7.88	97	96.3577	NONE	NONE	NONE	NONE	NONE	0	0	0	0	0	0	0	0	0	0	0		NONE	NONE
10-06-45-63	20 mg daily	20	53	male	106	1.79	33.0826	NO	NKA	no			yes		AF and atrial flutter	rivaroxaban	None	Atrial arrhythmia, DM, DLD, Non obstructive CAD, Bicuspid AV , with mild AS, HFpEF, OSA, Mild renal impairment	26	17	57	30	5.55	134	84.1144	NONE	NONE	NONE	NONE	NONE	0	0	0	0	0	0	0	0	0	0	0		NONE	NONE
10-18-03-66	20 mg daily	20	53	male	80	1.6	31.25	NO	NKA	no			yes		flutter	rivaroxaban	None	Atrial flutter	60	0	0	30.3	6.25	104	81.7949	NONE	NONE	NONE	NONE	NONE	0	0	0	0	0	0	0	0	0	0	0		NONE	NONE
10-13-95-53	20 mg oral tablet, 1 tab(s), Oral, qPM	20	53	female	83	1.58	33.2479	NO	NKA	no			yes		a-fib	rivaroxiban	None	AF,HTN	19	12	57	39.85	6.69	57	154.836	NONE	NONE	NONE	NONE	NONE	0	0	0	0	0	0	0	0	0	0	1		NONE	NONE
00-96-12-14	20 mg oral tablet, 1 tab(s), Oral, qPM	20	53	female	61	1.54	25.721	NO	NKA	no			yes		paroxysmal a-fib	rivaroxaban	None	HTN, hyperlipedimic, DM	23	23	86	42.38	11.09	59	109.938	NONE	NONE	NONE	2	NONE	0	0	0	0	0	1	0	0	0	0	0		NONE	NONE
00-89-31-36	20 mg oral tablet, 20 mg, 1 tab(s), Oral, Daily	20	53	male	69	1.68	24.4473	yes	NKA	yes		Small sub segmental portal vein thrombi and splenic thrombus	no			rivaroxaban	None	DM, IDA,	15	11	110	35.82	6.85	62	118.339	NONE	NONE	NONE	NONE	NONE	0	0	0	0	0	0	0	0	0	0	1		NONE	NONE
00-89-79-99	20 mg, Oral, qPM, 3 refills	20	53	male	66	1.63	24.841	NO	NKA	yes		DVT( left lower limp) and PE	no			rivaroxaban	None	DM, DVT, PE,	36	20	81	40.56	16.44	74	94.8378	NONE	NONE	NONE	NONE	NONE	0	0	0	0	0	0	0	0	0	0	1		NONE	NONE
00-02-70-79	rivaroxaban 20 mg / 1 tab(s) Oral QPM	20	53	F	116.7	1.48	53.2779	NO	NKA	NO	NONE	NONE	NONE	NONE	NONE	RIVA	NO	BREAST CANCER, IRON DEF, ANEMIA, COPD, DM, HTN, HYPOTHYROIDISM	21	15	165	34.26	11.14	58	213.95	NONE	NONE	NONE	NONE	NONE	0	0	0	0	0	1	1	0	0	0	1		NONE	NONE
00-17-18-30	rivaroxaban 20 mg/ 1 tab(s) Oral Daily	20	53	M	140	1.7	48.4429	NO	NKA	NO	NONE	NONE	NONE	NONE	NONE	RIVA	ASA	DM, HTN, MITRAL REG. MORBID OBESE , SLEEVE GASTRECTOMY	35	14	99	34	12	85	175.137	NONE	NONE	NONE	NONE	NONE	0	0	0	0	0	1	0	0	0	0	1		NONE	NONE
00-35-69-85	rivaroxaban 20 mg/ 1 tab(s) Oral Daily	20	53	F	67	1.46	31.4318	NO	NKA	NO	NONE	NONE	NONE	NONE	NONE	RIVA	NO	T2DM, RT ADRENAL MASS RESECTION	24	19	136	33.92	3.2	29	245.667	NONE	NONE	NONE	NONE	NONE	0	0	0	0	0	1	0	0	1	1	0		NONE	NONE
00-82-05-97	rivaroxaban 20 mg/ 1 tab(s) Oral Daily	20	53	F	85	1.55	35.3798	NO	NKA	NO	NONE	NONE	NONE	NONE	NONE	RIVA	NO	APS, SLE, HTN, OA, IVC THROMBOSI	13	14	83	30.46	5.06	47	192.305	NONE	NONE	NONE	NONE	NONE	0	0	0	0	0	0	0	0	0	0	0		NONE	NONE
00-21-11-47	rivaroxaban 20 mg/ 1 tab(s) Oral Daily	20	53	F	74	1.69	25.9095	NO	NKA	Yes	2014	DVT, PE	NONE	NONE	NONE	RIVA	NO	APS, DVT, PE (ANTIPHOSPHOLIPID SYNDROME ON WARFARIN	36	19	107	37.52	8.07	54	145.716	NONE	NONE	NONE	NONE	NONE	0	0	0	0	0	0	0	0	0	0	0		NONE	NONE
00-96-89-79	10 mg daily	10	54	male	97.2	1.731	32.4393	NO	NKA	yes		SUPERIOR MESENTERIC VEIN THROMBOSIS	no			rivaroxaban	None	BOWEL INFARCTION	39	30	74	39.22	24.59	77	132.686	NONE	NONE	NONE	NONE	NONE	0	0	0	0	0	1	1	0	0	0	1		NONE	NONE
01-09-67-05	10 mg daily	10	54	female	73	1.62	27.8159	NO	NKA	yes	41913	CEREBRAL SINUS THROMBOSIS	no			rivaroxaban	ASA, 81 mg, Oral, Daily	HTN, DLD, DM	26	18	69	40.3	19.19	60	127.885	NONE	NONE	NONE	NONE	NONE	0	0	0	0	0	0	0	0	0	0	1		NONE	NONE
02-40-45-41	10 mg daily	10	54	female	76	1.58	30.4438	NO	NKA	no			None			rivaroxaban	aspirin, 81 mg, Oral, Daily		35	14	99	34	12	85	93.9817	NONE	NONE	NONE	NONE	NONE	0	0	0	0	0	0	0	0	0	0	0		NONE	NONE
02-28-92-10	10 mg daily	10	54	female	67	1.61	25.8478	NO	egg plant	no			no			rivaroxaban	None	LEFT HALLUX VALGUS PROCEDURE, LAPIDUS	11.1	14.3	60	44	5.2	49	143.723	NONE	NONE	NONE	NONE	NONE	0	0	0	0	0	0	0	0	0	0	0		NONE	NONE
10-15-10-66	10 mg oral daily	10	54	male	105	1.735	34.8811	NO	NKA	no			no			rivaroxiban	None	TKR	11	13	65	30.48	8.44	68	162.304	NONE	NONE	NONE	NONE	NONE	0	0	0	0	0	0	0	0	0	0	0		NONE	NONE
10-11-95-90	10 mg oral qpm	10	54	male	95	1.85	27.7575	yes	NKA	no			no			rivaroxiban	plavix 75 mg	DM,HTN,HF,LV THROMBUS,CKD	12	11	58	28.75	3.32	166	60.1539	NONE	NONE	NONE	NONE	NONE	0	0	0	0	0	0	0	0	0	1	0		NONE	NONE
01-15-83-95	10 mg orally for 21 days	10	54	female	93	1.59	36.7865	NO	NKA	no			no			rivaroxiban	None	TKI	25	17	81	38.79	8.54	55	177.733	NONE	NONE	NONE	NONE	NONE	0	0	0	0	0	0	0	0	0	0	0		NONE	NONE
00-06-91-99	rivaroxaban 10 mg / 1 tab(s) Oral QPM	10	54	F	64	1.53	27.3399	NO	NKA	NO	NONE	NONE	NONE	NONE	NONE	RIVA	NO	BUDD CHIARY SYNDROME, ASCITIS, ABDOMINAL DISTENSION	16	23	125	31.29	25.75	33	203.852	NONE	NONE	NONE	NONE	NONE	0	0	0	0	0	0	0	0	0	0	0		NONE	NONE
00-34-31-38	rivaroxaban 10 mg/ 1 tab(s) Oral Daily	10	54	F	102	1.63	38.3906	NO	NKA	NO	NONE	NONE	NONE	NONE	NONE	RIVA	ASA	HTN, BILATERAL COMMON FEMORAL ARTERY THROMBOEMBOISM, OBESITY.BOWEL ISCHEMIA	21	11	70	35.18	3.52	68	157.667	NONE	NONE	NONE	NONE	NONE	0	0	0	0	0	1	0	0	0	0	0		NONE	NONE
00-21-53-32	rivaroxaban 10 mg/ 1 tab(s) Oral Daily	10	54	F	62	1.69	21.7079	NO	NKA	NO	NONE	NONE	NONE	NONE	NONE	RIVA	NO	RIGHT PATELLA FRACTURE	31	22	80	38.5	5.53	58	112.36	NONE	NONE	NONE	NONE	NONE	0	0	0	0	0	0	0	0	0	0	0		NONE	NONE
01-16-48-58		10	54	female	70.2	1.55	29.2196	NO	banana,strawberry,mango,grapes	no			yes		A-FIB	rivaroxiban	None	DM,HTN,A-FIB,CKD,HYPOTHYRODSIM	153	206	119	39.15	120.02	191	38.6325	NONE	NONE	NONE	NONE	NONE	0	0	0	0	0	1	0	0	0	0	0		NONE	NONE
10-11-81-80	15 mg oral daily	15	54	male	56	1.65	20.5693	NO	NKA	no			no			rivaroxiban	None	HTN,IHD,SRTOKE,BEDRIDDEN	86	14	99	5.48	15.3	255	23.0832	NONE	NONE	NONE	NONE	NONE	0	0	0	0	0	0	0	0	0	0	0		NONE	NONE
00-84-73-00	15 mg oral tablet, 15 mg, 1 tab(s), Oral, qPM	15	54	female	85	1.56	34.9277	NO	NKA	no			yes	43763	Valvular heart disease	rivaroxaban	aspirin, 81 mg, Oral, Daily	DM	35	14	99	34	12	85	105.111	NONE	NONE	NONE	NONE	NONE	0	0	0	0	0	0	0	0	0	0	0		NONE	NONE
01-15-12-75	15 mg table qpm	15	54	female	74	1.475	34.0132	NO	NKA	no			no			rivaroxiban	None	HTN,DLD	16	6	133	32.96	5.62	90	86.4247	NONE	NONE	NONE	NONE	NONE	0	0	0	0	0	0	0	0	0	0	0		NONE	NONE
00-84-64-90	15mg Tab, 15 mg, 1 tab(s), Oral	15	54	male	84	1.75	27.4286	no	NKA	yes	N/A		no			rivaroxaban	None	DM, HTN, DLD, hypothyrodism	35	14	99	34	12	85	103.875	NONE	NONE	NONE	NONE	NONE	0	0	0	0	0	0	0	0	0	0	1		NONE	NONE
00-43-11-00	rivaroxaban 15 mg / 1 tab(s) Oral Daily	15	54	M	101.1	1.7	34.9827	NO	NKA	NO	NONE	NONE	NONE	NONE	NONE	RIVA	ASA	DM, HTN, CKD, IHD, STROKE IN 2015. PHYSICIAN WROTE IN 2018 NOTE SAID (PATIENT ON RIVAROX 15MG STARTED BY CARDIOLOGY WITH NO CLEAR CAUSE WHY IT WAS STARTED	19	9	105	32.8	7.68	159	66.8348	NONE	NONE	NONE	NONE	NONE	0	0	0	0	0	1	0	1	0	0	1		NONE	NONE
01-01-98-44	20 mg daily	20	54	male	95.5	1.6	37.3047	NO	NKA	no			yes			rivaroxaban	None	HTN, Dilated cardiomyopathy, Afib	43	46	262	17.26	17.73	117	85.7958	NONE	NONE	NONE	NONE	NONE	0	0	0	0	0	1	1	0	0	0	1		NONE	NONE
10-22-51-24	20 mg daily	20	54	female	63.6	1.44	30.6713	NO	bread, glutens	no			yes			rivaroxaban	None	Afib, Valvular heart disease, BA, IBS, DM, celiac disease	14	16	75	33.52	3.89	56	119.376	NONE	NONE	NONE	NONE	NONE	0	0	0	0	0	0	0	0	0	0	1		NONE	NONE
10-20-03-48	20 mg daily	20	54	female	152	1.64	56.514	NO	NKA	no			yes			rivaroxaban	None	Afib, DLP, BA, obese, HTN, POST AVR TISSUE VALVE	130	133	166	31.25	8.31	79	202.239	NONE	NONE	NONE	NONE	NONE	0	0	0	0	0	1	1	0	0	0	0		NONE	NONE
01-04-81-12	20 mg daily	20	54	female	87.6	1.51	38.4194	NO	NKA	yes		PE	no			rivaroxaban	None	HTN, DM, hypothyrodism, DLP	32	24	104	34.66	6.29	55	167.413	NONE	NONE	NONE	NONE	NONE	0	0	0	0	0	0	0	0	0	0	0		NONE	NONE
10-17-92-65	20 mg daily	20	54	female	52.8	1.48	24.1052	NO	NKA	yes	43221	UNPROVOKED RIGHT LEG DVT, extensive DVT to the iliac vein	no			rivaroxaban	None	DVT	35	14	99	34	12	85	65.2925	NONE	NONE	NONE	NONE	NONE	0	0	0	0	0	0	0	0	0	0	0		NONE	NONE
10-01-51-65	20 mg daily	20	54	male	79.6	1.6	31.0937	NO	NKA	yes		left leg DVT	no			rivaroxaban	None	DM, DLD, DVT	29	18	58	38	7.12	95	88.072	NONE	0.27	NONE	NONE	NONE	0	0	0	0	0	0	0	0	0	0	0		NONE	NONE
10-18-11-48	20 mg daily	20	54	male	104	1.74	34.3506	NO	NKA	no			yes		PAF	rivaroxaban	None	Afib, SVT	36	22	67	40.77	32.72	90	121.462	NONE	NONE	NONE	NONE	NONE	0	0	0	0	0	0	0	0	0	0	0		NONE	NONE
10-14-79-13	20 mg oral daily	20	54	female	83	1.59	32.831	NO	NKA	no			no			rivaroxiban	None	portal vein thrombosis,TKR,	12	8	52	28.7	7.64	64	136.316	NONE	NONE	NONE	NONE	NONE	0	0	0	0	0	0	0	0	0	0	0		NONE	NONE
01-17-93-25	20 mg oral qpm	20	54	male	98.3	1.66	35.6728	NO	NKA	yes		PE	NO			rivaroxiban	None	PE,SOB,ASTHMA	24	14	99	35.73	8.02	79	130.79	NONE	NONE	NONE	NONE	NONE	0	0	0	0	0	0	0	0	0	0	0		NONE	NONE
10-11-64-56	20 mg oral tablet, 1 tab(s), Oral, qPM	20	54	male	112	1.81	34.187	NO	NKA	no			yes		A-fib	rivaroxiban	None	DM,HTN,DLP,GOUT,BPH	38	14	87	44.93	8.14	112	105.111	NONE	NONE	NONE	NONE	NONE	0	0	0	0	0	1	0	0	0	0	0		NONE	NONE
10-12-26-78	20 mg oral tablet, 1 tab(s), Oral, qPM	20	54	female	83.5	1.6	32.6172	NO	NKA	no			yes		atrial flutter	rivaroxiban	None	AF,	20	17	87	37.43	16.25	76	115.484	NONE	NONE	NONE	NONE	NONE	0	0	0	0	0	0	0	0	0	0	0		NONE	NONE
00-17-48-06	rivaroxaban 20 mg/ 1 tab(s) Oral Daily	20	54	F	74	1.56	30.4076	NO	NKA	NO	NONE	NONE	NONE	NONE	NONE	RIVA	ASA	BA, DLD, HTN, OSTEOPENIA, DM, LOSS OF CONCIOUSNESS	35	14	99	34	12	85	91.5085	NONE	NONE	NONE	NONE	NONE	0	0	0	0	0	0	1	0	0	0	1		NONE	NONE
00-62-92-21	rivaroxaban 20 mg/ 1 tab(s) Oral Daily	20	54	M	107	1.75	34.9388	NO	AMOXIL	NO	NONE	NONE	NONE	NONE	NONE	RIVA	NO	HTN, DM, AFIB	35	14	99	34	12	85	132.316	NONE	NONE	NONE	NONE	NONE	0	0	0	0	0	1	0	0	0	0	1		NONE	NONE
00-19-33-73	rivaroxaban 20 mg/ 1 tab(s) Oral Daily	20	54	F	86	1.68	30.4705	NO	NKA	Yes	?	DVT	NONE	NONE	NONE	RIVA	NO	DVT, HYPOTHYROIDISM , FRACTURE OF PELVIS	17	13	81	40.12	12.56	58	155.854	NONE	NONE	NONE	NONE	NONE	0	0	0	0	0	1	1	0	0	0	0		NONE	NONE
00-13-44-57	rivaroxaban 20 mg/ 1 tab(s) Oral Daily	20	54	M	89	1.73	29.737	NO	NKA	NO	NONE	NONE	NONE	NONE	NONE	RIVA	NO	AFIB, DEGENERATIVE LUMBAR SCOILOSIS, HTN,	40	71	41	33.7	12.84	64	146.17	NONE	NONE	NONE	NONE	NONE	0	0	0	0	0	1	0	0	0	0	0		NONE	NONE
10-23-31-16	rivaroxaban 20 mg/ 1 tab(s) Tab Oral Daily	20	54	M	90	1.6	35.1562	NO	NKA	NO	NONE	NONE	None	None	None	Rivaroxaban	None	DM,HTN, MASS AFFECTING BRAIN AND BONE	15	6	87	30.64	5.94	31	305.161	None	None	None	None	None	0	0	0	0	1	0	0	0	0	0	0		NONE	NONE
00-82-71-95	rivaroxaban15MG BID THEN 20 mg/ 1 tab(s) Oral Daily	20	54	F	69.5	1.56	28.5585	NO	PENICILLIN	Yes	2017	PE	NONE	NONE	NONE	RIVA	NO	DLD, BA, HTN, PE	29	15	66	40.36	11.48	63	115.956	NONE	NONE	NONE	NONE	NONE	0	0	0	0	0	1	1	0	0	0	0		NONE	NONE
01-12-65-90	10 mg daily	10	55	female	115	1.48	52.5018	no	meropenem	yes		subsegmental PE	no			rivaroxaban	None	DLBCL	23	17	74	35.62	6.3	70	170.675	NONE	NONE	NONE	NONE	NONE	0	0	0	0	0	0	0	1	0	0	0		NONE	NONE
01-19-72-64	10 mg daily	10	55	female	66.81	1.57	27.1045	NO	NKA	no			no			rivaroxaban	None	TKR, RA	35	14	99	34	12	85	81.6567	NONE	NONE	NONE	NONE	NONE	0	0	0	0	0	0	0	0	0	0	0		NONE	NONE
10-09-69-45	10 mg daily	10	55	female	95	1.68	33.6593	NO	NKA	no			no			rivaroxaban	None	TKR, DLD, GAD, thyroidectomy	35	31	115	26.3	11.91	50	197.389	NONE	NONE	NONE	NONE	NONE	0	0	0	0	0	0	0	0	0	0	0		NONE	NONE
10-22-97-62	10 mg daily	10	55	female	107	1.59	42.3243	NO	NKA	no			no			rivaroxaban	None	TKR	15	11	64	26.93	8.09	51	217.963	NONE	NONE	NONE	NONE	NONE	0	0	0	0	0	0	0	0	0	0	0		NONE	NONE
01-00-48-99	10 mg daily	10	55	female	93	1.53	39.7283	NO	NKA	yes		Pulmonary Embolism ( unprovoked)	no			rivaroxaban	None	Asthma	23	9	74	36.72	8.55	62	155.833	NONE	NONE	NONE	NONE	NONE	0	0	0	0	0	0	0	0	0	0	0		NONE	NONE
10-13-11-83	10 mg oral daily	10	55	female	92	1.6	35.9375	NO	NKA	no			yes		a-fib	rivaroxiban	None	CML,AFIB,CKD,HYPOTHYRODSIM	35	14	99	34	12	85	112.444	NONE	NONE	NONE	NONE	NONE	0	0	0	0	0	1	1	0	0	0	1		NONE	NONE
10-14-83-38	10 mg oral daily	10	55	female	74	1.69	25.9095	NO	NKA	no			no			rivaroxiban	None	breast cancer 2 years ago , HTN	38	41	55	28.78	6.44	88	87.3611	NONE	NONE	NONE	NONE	NONE	0	0	0	0	0	1	0	0	0	0	0		NONE	NONE
10-14-77-49	10 mg oral daily	10	55	female	67	1.62	25.5296	NO	NKA	no			no			rivaroxiban	None	TKR	13	16	67	26.3	5.84	64	108.759	NONE	NONE	NONE	NONE	NONE	0	0	0	0	0	0	0	0	0	0	0		NONE	NONE
00-09-16-43	rivaroxaban 10 mg Oral Daily	10	55	F	99	1.67	35.4979	NO	NKA	Yes	2018	UNPROVOKED PE, DVT	NONE	NONE	NONE	RIVA	NO	DM, HYPOTHYROIDISM, HTN, UNPROVOKED PE AND DVT,	23	12	58	35.54	3.56	76	135.329	NONE	NONE	NONE	NONE	NONE	0	0	0	0	0	1	1	0	0	0	1		NONE	NONE
00-32-44-06	rivaroxaban 10 mg/ 1 tab(s) Oral Daily	10	55	F	65	1.51	28.5075	NO	NKA	NO	NONE	NONE	NONE	NONE	NONE	RIVA	ASA	RENAL VEIN THROMBOSIS, IDA, DM, HYPOTHYROIDISM, HTN, HEP.C	20	12	99	37.36	3.32	84	80.3902	NONE	NONE	NONE	NONE	NONE	0	0	0	0	0	1	1	0	0	0	1		NONE	NONE
00-31-69-66	rivaroxaban 10 mg/ 1 tab(s) Oral Daily	10	55	F	84	1.49	37.8361	NO	FISH, EGG, EGGPLANT, BANANA	NO	NONE	NONE	NONE	NONE	NONE	RIVA	ASA	T2DM, DLD, BA, SLEEP APNEA ON CPAP, SAGITTAL SINUS THROMBOSIS, OA, DEPRESSION,	40	15	95	40.06	6.32	108	80.8025	NONE	NONE	NONE	NONE	NONE	0	0	0	0	0	1	0	0	0	0	1		NONE	NONE
00-25-88-73	rivaroxaban 10 mg/ 1 tab(s) Oral Daily	10	55	M	54.9	1.65	20.1653	NO	NKA	NO	NONE	NONE	NONE	NONE	NONE	RIVA	NO	SCHIZOPHRENIA, DM , PLEURAL EFFUSION, BASAL ASPIRATION , BOWEL ISCHEMIA	35	14	99	34	12	85	67.1	NONE	NONE	NONE	NONE	NONE	0	0	0	0	0	0	0	0	1	1	0		NONE	NONE
10-09-46-51	15 mg daily	15	55	female	84	1.575	33.8624	NO	NKA	no			no			rivaroxaban	None	Afib, SLE, DM, Left Breast cancer with METS	26	26	112	27.78	24.67	86	101.473	NONE	NONE	NONE	NONE	NONE	0	0	0	0	0	1	1	1	0	0	1		NONE	NONE
01-16-50-31	15 mg daily qpm	15	55	female	100.4	1.6	39.2187	NO	NKA	yes		DVT,PE	no			rivaroxiban	None	DM,DVT,HTN	35	19	34.62	99	5.37	57	182.99	NONE	NONE	NONE	NONE	NONE	0	0	0	0	0	0	0	0	0	1	0		NONE	NONE
01-17-43-57	15 mg for 21 days then 20 OD for 6 months	15	55	male	113	1.67	40.5178	NO	NKA	no			yes		A-fib	rivaroxiban	None	HTN,DM,RHD	66	14	99	31.1	6.31	84	139.755	NONE	NONE	NONE	NONE	NONE	0	0	0	0	0	0	0	0	0	0	0		NONE	NONE
10-12-61-78	15 mg oral daily	15	55	male	85	1.75	27.7551	NO	NKA	no			yes		a-fib	rivaroxiban	None	HTN,DM,IHD,SOB	30	35	150	23.94	41.02	127	69.5319	NONE	NONE	NONE	NONE	NONE	0	0	0	0	0	0	0	1	0	0	0		NONE	NONE
00-18-27-56	rivaroxaban 15 mg / 1 tab(s) Oral Daily	15	55	F	94.1	1.635	35.2009	NO	NKA	Yes	RECURRENT	PE	NONE	NONE	NONE	RIVA	ASA	APS, DM, DLD, HTN, RECURRENT PE, IRON DEFFICIENY ANEMIA.	38	21	73	39.87	6.32	58	168.551	NONE	NONE	NONE	NONE	NONE	0	0	0	0	0	0	1	0	0	0	1		NONE	NONE
00-07-02-21	rivaroxaban 15 mg / 1 tab(s) Oral QPM	15	55	F	110	1.57	44.6266	NO	NKA	NO	NONE	NONE	NONE	NONE	NONE	RIVA	NO	HTN, PAROXYSMAL AFIB, DM	15	12	103	37.33	7.41	53	215.618	NONE	NONE	NONE	NONE	NONE	0	0	0	0	0	0	0	0	0	0	1		NONE	NONE
10-19-46-15	20 mg daily	20	55	female	78	1.61	30.0914	NO	NKA	no			yes			rivaroxaban	None	DM, metastatic rectal cancer, Afib	20	12	113	32.72	5.9	86	94.2248	NONE	NONE	NONE	NONE	NONE	0	0	0	0	0	0	0	0	0	0	1		NONE	NONE
10-10-49-50	20 mg daily	20	55	female	65.2	1.6	25.4687	NO	NKA	yes		Cerebral venous thrombosis	no			rivaroxaban	None	HTN, DM, Cerebral venous thrombosis	18	18	82	34	4.81	46	147.251	NONE	NONE	NONE	NONE	NONE	0	0	0	0	0	1	0	0	0	1	0		NONE	NONE
10-20-20-03	20 mg daily	20	55	male	68	1.71	23.255	NO	NKA	yes		LA thrombus at the appendage	yes			rivaroxaban	None	Atrial Fibrillation with HF secondary to dilated cardiomyopathy,	57	38	78	36.03	9.3	120	58.8704	NONE	NONE	NONE	NONE	NONE	0	0	0	0	0	0	0	0	0	1	0		NONE	NONE
10-02-47-64	20 mg daily	20	55	female	64	1.57	25.9645	NO	NKA	no			no			rivaroxaban	aspirin, 81 mg, Oral, Daily	with pancreatic cyst post open distal pancreatectomy with splenectomy for Multicystic serous, Anxiety and fear, HTN, DLD, Risk of bleeding	20	14	116	38.47	6.52	67	99.2371	NONE	NONE	NONE	NONE	NONE	0	0	0	0	0	1	1	0	0	0	0		NONE	NONE
10-25-09-82	20 mg daily	20	55	female	118	1.54	49.7554	NO	NKA	yes		unprovoked PE	no			rivaroxaban	None	PE	18	14	83	35.8	5.08	71	172.66	NONE	NONE	NONE	NONE	NONE	0	0	0	0	0	1	0	0	0	0	0		NONE	NONE
00-94-20-35	20 mg OD	20	55	male	73	1.6	28.5156	NO	NKA	no			yes		Atrial fibrillation	Rivaroxaban	None	DM, HTN ,IHD , atrial fib	71	35	84	29.98	11.01	141	53.7864	NONE	NONE	NONE	NONE	NONE	0	0	0	0	0	1	0	0	0	0	0		NONE	NONE
10-12-30-34	20 mg oral tablet, 1 tab(s), Oral, qPM	20	55	male	75	1.6	29.2969	NO	NKA	yes		PE	NO			rivaroxiban	None	HTN,DM,IHD, PE , AORTIC THROMBOSIS	12	9	107	18.8	2.49	45	173.148	NONE	NONE	NONE	NONE	NONE	0	0	0	0	0	0	0	0	0	0	0		NONE	NONE
10-13-47-19	20 mg oral tablet, 1 tab(s), Oral, qPM	20	55	male	87.5	1.71	29.9237	NO	NKA	no			yes		a-fib	rivaroxiban	None		19	14	54	27.38	7.45	76	119.609	NONE	NONE	NONE	NONE	NONE	0	0	0	0	0	0	0	0	0	0	0		NONE	NONE
01-15-08-87	20 mg table orally aily	20	55	female	79	1.64	29.3724	NO	NKA	no			no			rivaroxiban	aspirin 81 oral daily	OA, DLD,	79	43	142	34.5	4.49	44	186.528	NONE	NONE	NONE	NONE	NONE	0	0	0	0	0	0	0	0	0	0	0		NONE	NONE
01-02-85-64	rivaroxaban 20 mg/ 1 tab(s) Oral Daily	20	55	F	85	1.6	33.2031	NO	NKA	NO	NONE	NONE	None	None	None	Rivaroxaban	Aspirin/Clopidogril	HTN, AFIB, STROKE IN 2015, GALLBLADDER STONE	31	26	173	31.87	8.05	72	122.647	None	None	None	None	None	0	0	0	0	0	1	0	1	0	1	1		NONE	NONE
00-15-12-93	rivaroxaban 20 mg/ 1 tab(s) Oral Daily	20	55	F	89	1.56	36.5713	NO	NKA	NO	NONE	NONE	NONE	NONE	NONE	RIVA	NO	DM, DLD, HTN, PAFIB,	27	21	71	37.91	12.22	65	142.248	NONE	NONE	NONE	NONE	NONE	0	0	0	0	0	0	1	0	0	0	1		NONE	NONE
00-18-11-38	rivaroxaban 20 mg/ 1 tab(s) Oral Daily	20	55	F	70	1.58	28.0404	NO	NKA	Yes	?	DVT	NONE	NONE	NONE	RIVA	ASA	HTN, DM, BA, HEMORRHAGIC STROKE , PROVOKED ACUTE DVT, LEFT LOWER LIMB FRACTURE, EXTREMELY DEPRESSED, STROKE 2015 AND DVT TOGETHER WITH IT	35	14	99	34	12	85	85.5556	NONE	NONE	NONE	NONE	NONE	0	0	0	0	0	1	0	0	0	0	1		NONE	NONE
00-38-40-41	rivaroxaban 20 mg/ 1 tab(s) Oral Daily	20	55	F	80	1.52	34.626	NO	AMOXICILLIN, PENICILLIN	Yes	?	PE	NONE	NONE	NONE	RIVA	ASA	DM, GAD, TOTAL THYROIDECTOMY, DLD, GERD, IBS, PE	34	26	88	32.85	6.66	64	129.861	NONE	NONE	NONE	NONE	NONE	0	0	0	0	0	1	0	0	0	0	1		NONE	NONE
00-33-39-82	rivaroxaban 20 mg/ 1 tab(s) Oral Daily	20	55	F	94	1.6	36.7187	NO	NKA	NO	NONE	NONE	NONE	NONE	NONE	RIVA	NO	DM, DLD, PAROX AFIB, HX OF PE 26 YEARS AGO,	16	12	102	29.92	7.66	90	108.506	NONE	NONE	NONE	NONE	NONE	0	0	0	0	0	1	0	0	0	0	1		NONE	NONE
00-26-41-46	rivaroxaban 20 mg/ 1 tab(s) Oral Daily	20	55	F	68	1.52	29.4321	NO	NKA	NO	NONE	NONE	NONE	NONE	NONE	RIVA	ASA	HTN, RIGHT MCA, APS, EPILEPSY, HYPOTHYROIDISM	19	15	106	35.93	4.33	87	81.2005	NONE	NONE	NONE	NONE	NONE	0	0	0	0	0	0	0	1	0	0	0		NONE	NONE
00-70-67-83	rivaroxaban 20 mg/ 1 tab(s) Oral Daily	20	55	F	66	1.55	27.4714	NO	NKA	NO	NONE	NONE	NONE	NONE	NONE	RIVA	NO	HTN, HYPOTHYROIDISM, AFIB, VARICOSA VEIN BILATERAL LL	53	50	75	38.14	29.66	104	65.9295	NONE	NONE	NONE	NONE	NONE	0	0	0	0	0	0	0	1	0	0	0		NONE	NONE
00-52-85-35	rivaroxaban 20 mg/ 1 tab(s) Oral Daily	20	55	F	89	1.59	35.2043	NO	NKA	NO	NONE	NONE	NONE	NONE	NONE	RIVA	NO	AFIB, HTN, BA,	19	20	147	34.8	9.6	80	115.576	NONE	NONE	NONE	NONE	NONE	0	0	0	0	0	1	0	0	0	0	0		NONE	NONE
00-77-76-70	rivaroxaban 20 mg/ 1 tab(s) Oral Daily	20	55	F	88	1.64	32.7186	NO	NKA	NO	NONE	NONE	NONE	NONE	NONE	RIVA	ASA	PROVOKED VTE AFTER SURGERY ON RIV	36	19	90	39.66	6.87	61	149.872	NONE	NONE	NONE	NONE	NONE	0	0	0	0	0	0	0	0	0	0	0		NONE	NONE
00-14-33-00	rivaroxaban 20 mg/ 1 tab(s) Oral Daily	20	55	F	70	1.53	29.903	NO	NKA	Yes	2012	DVT	NONE	NONE	NONE	RIVA	ASA	DVT 2012, LIMB AMPUTATION	39	15	126	33.35	5.43	61	119.217	NONE	NONE	NONE	NONE	NONE	0	0	0	0	0	0	0	0	0	0	0		NONE	NONE
00-33-46-49	rivaroxaban 20 mg/ 1 tab(s) Oral Daily	20	55	F	98	1.56	40.2696	NO	NKA	Yes	21 YEARS BACK	DVT	NONE	NONE	NONE	RIVA	NO	DVT 1ST EPISODE 21 YEARS BACK, 2ND UNPROVOKED 10 YEARS BACK, 3RD WAS ON PREGNANCY 5 YEARS BACK, OFF TREATMENT 2-3 YEARS AND PATIENT WAS SEEN BEFORE 2 YEARS 12-2016 AND TO BE STARTED ON RIVAROX AND NO HX OF DVT AFTER RIVA	24	11	76	34.82	6.29	62	164.211	NONE	NONE	NONE	NONE	NONE	0	0	0	0	0	0	0	0	0	0	0		NONE	NONE
00-46-01-15	rivaroxaban 20 mg/ 1 tab(s) Oral Daily	20	55	F	70.8	1.57	28.7233	NO	NKA	Yes	RECURRENT, LAST ONE 2008	DVT	NONE	NONE	NONE	RIVA	NO	SLE, RECURRENT DVT, PE AND STROKE	24	13	79	34.27	5.3	84	87.5635	NONE	NONE	NONE	NONE	NONE	0	0	0	0	0	0	0	0	0	0	0		NONE	NONE
00-82-35-08	rivaroxaban 20 mg/ 1 tab(s) Oral Daily	20	55	M	51	1.1	42.1488	NO	NKA	Yes	2015	DVT	NONE	NONE	NONE	RIVA	NO	QUADRIPLEGIC SINCE BIRTH, DVT, STARTED ON WARFARIN AT 2015 THEN SHIFTED TO RIVA	30	36	237	27.44	9.87	66	80.2778	NONE	NONE	NONE	NONE	NONE	0	0	0	0	0	0	0	0	0	0	0		NONE	NONE
00-97-99-01	rivaroxaban 15 mg BID, warfarin 14.5 mg daily	30	55	female	131	1.7	45.3287	NO	NKA	yes		PE	no			rivaroxaban and warfarin	None	HTN, PE, obesity	31	21	158	33.07	11.74	54	252.027	NONE	NONE	NONE	NONE	NONE	0	0	0	0	0	0	0	0	0	0	0		NONE	NONE
10-23-21-23	10 mg daily	10	56	female	80	1.6	31.25	NO	NKA	no			no			rivaroxaban	None	pin replacement, DM	18	0	0	37.5	4.57	58	141.609	NONE	NONE	NONE	NONE	NONE	0	0	0	0	0	0	0	0	0	0	1		NONE	NONE
10-08-70-30	10 mg daily	10	56	male	57.5	1.67	20.6174	NO	rasburicase	no			no			rivaroxaban	None	bilateral neck mass	37	17	101	28	2.91	75	78.7111	NONE	NONE	NONE	NONE	NONE	0	0	0	0	0	0	0	0	0	1	0		NONE	NONE
10-21-30-93	10 mg daily	10	56	female	57	1.45	27.1106	NO	NKA	no			no			rivaroxaban	None	HTN, RA, left knee OA	24	21	86	27.28	5.59	40	146.3	NONE	NONE	NONE	NONE	NONE	0	0	0	0	0	1	0	0	0	0	0		NONE	NONE
10-22-93-95	10 mg daily	10	56	male	115.6	1.73	38.6247	NO	NKA	yes	42917	PE	no			rivaroxaban	None	HTN, PE	21	14	51	39.44	10.49	86	138.003	NONE	> 20	NONE	NONE	NONE	0	0	0	0	0	1	0	0	0	0	0		NONE	NONE
10-09-12-07	10 mg daily	10	56	female	80	1.54	33.7325	NO	NKA	no			no			rivaroxaban	None	DLP, breast Ca, MRM	31	15	89	39.11	6.76	44	186.667	NONE	NONE	NONE	NONE	NONE	0	0	0	0	0	0	0	0	0	0	0		NONE	NONE
10-21-92-40	10 mg daily	10	56	female	75.3	1.475	34.6107	NO	NKA	no			no			rivaroxaban	None	bilateral TKR	22	20	61	24.85	8.46	44	175.7	NONE	NONE	NONE	NONE	NONE	0	0	0	0	0	0	0	0	0	0	0		NONE	NONE
00-97-43-66	10 mg daily	10	56	male	63.5	1.5	28.2222	NO	NKA	no			no			rivaroxaban	None	IgG-Kappa MM, hypothyrodism	31	44	90	33.01	2.66	48	135.819	NONE	NONE	NONE	NONE	NONE	0	0	0	0	0	0	0	0	0	0	0		NONE	NONE
10-15-58-19	10 mg oral for 21 days	10	56	male	117	1.75	38.2041	NO	NKA	no			no			rivaroxiban	None	TKR	24	17	80	36.92	4.78	66	182	NONE	NONE	NONE	NONE	NONE	0	0	0	0	0	0	0	0	0	0	0		NONE	NONE
00-09-42-11	rivaroxaban 10 mg Oral Daily	10	56	F	70.5	1.59	27.8866	NO	NKA	Yes	SIX MONTH AGA AFTER SURGERY DVT (2020)	DVT	NONE	NONE	NONE	RIVA	NO	ADENOMYOSIS, HYPOTHYROIDISM AND DVT	26	14	76	36.27	6.95	61	118.656	NONE	NONE	NONE	NONE	NONE	0	0	0	0	0	1	1	0	0	0	0		NONE	NONE
00-64-58-09	rivaroxaban 10 mg/ 1 tab(s) Oral Daily	10	56	F	84.7	1.55	35.2549	NO	EGG CONTAINING COMPOUND, EGGPLANT, MEROPENEM	NO	NONE	NONE	NONE	NONE	NONE	RIVA	NO	DLBCL. DM, HTN, DLD, OSTEOPENIA, HYPOTHYROIDISM, ON RIVA AS PROPHYLACTIC DOSE AS SHE DEVELOPED LEFT OVARIAN VEIN FILLING DEFECT IN KEEPING WITH THROMBOSIS	35	14	99	34	12	85	102.304	NONE	NONE	NONE	NONE	NONE	0	0	0	0	0	1	0	1	0	0	1		NONE	NONE
00-09-56-65	rivaroxaban 10 mg/ 1 tab(s) Oral Daily	10	56	M	79.2	1.68	28.0612	NO	NKA	NO	NONE	NONE	NONE	NONE	NONE	RIVA	ASA	IHD, HTN, DM, TKR	30	33	63	39.66	8.94	81	100.385	NONE	NONE	NONE	NONE	NONE	0	0	0	0	0	1	0	0	0	0	1		NONE	NONE
00-82-46-73	rivaroxaban 10 mg/ 1 tab(s) Oral Daily	10	56	F	95.9	1.51	42.0596	NO	NKA	NO	NONE	NONE	NONE	NONE	NONE	RIVA	TKR	TKR, DLD, HTN, HYPOTHYROI, OBESITY	91	84	100	31.5	13.17	61	161.405	NONE	NONE	NONE	NONE	NONE	0	0	0	0	0	1	0	1	0	0	0		NONE	NONE
00-45-86-04	rivaroxaban 10 mg/ 1 tab(s) Oral Daily	10	56	F	62	1.54	26.1427	NO	NKA	NO	NONE	NONE	NONE	NONE	NONE	RIVA	NO	MESENTERIC VEIN THROMBOSIS, DLD, HTN	25	14	85	37.34	8.99	61	104.35	NONE	NONE	NONE	NONE	NONE	0	0	0	0	0	1	1	0	0	0	0		NONE	NONE
00-01-52-18	rivaroxaban 10 mg/ 1 tab(s) Oral Daily	10	56	M	92.3	1.72	31.1993	NO	NKA	NO	NONE	NONE	NONE	NONE	NONE	RIVA	NO	ANEXIETY, HTN, THROMBOCYTOPENIA, STOP HEPARIN AND START RIVAROXABAN AFTER REPAIR INGUINAL HERNIA	40	18	84	40.35	13.17	94	100.81	NONE	NONE	NONE	NONE	NONE	0	0	0	0	0	1	0	0	0	0	0		NONE	NONE
00-80-00-45	rivaroxaban 10 mg/ 1 tab(s) Oral Daily	10	56	F	79	1.5	35.1111	NO	NKA	NO	NONE	NONE	NONE	NONE	NONE	RIVA	NO	UNPROVOKED DVT 12 YEARS AGO,	31	24	112	35.5	3.41	71	114.235	NONE	NONE	NONE	NONE	NONE	0	0	0	0	0	0	0	0	0	0	0		NONE	NONE
00-83-45-75	rivaroxaban 10 mg/ 1 tab(s) Oral Daily	10	56	F	93.5	1.6	36.5234	NO	NKA	NO	NONE	NONE	NONE	NONE	NONE	RIVA	NO	RIGHT FOOT CONSTRUCTION, BILATERAL HALLUX VALGUS AND FLAT FEET, DEPRESSION,	35	14	99	34	12	85	112.933	NONE	NONE	NONE	NONE	NONE	0	0	0	0	0	0	0	0	0	0	0		NONE	NONE
00-87-48-54	15 mg daily	15	56	male	91	1.82	27.4725	NO	NKA	yes			no			rivaroxaban	None	DM, DLD	22	20	50	37.32	4.3	80	116.783	NONE	NONE	NONE	NONE	NONE	0	0	0	0	0	1	0	0	0	0	1		NONE	NONE
10-23-52-49	15 mg daily	15	56	male	76	1.76	24.5351	NO	IV contrast	yes		LV thrombus	no			rivaroxaban	aspirin 81 mg, plavix 75 mg daily	IHD, HFrEF, DM, HT, Left pelvic fracture, LV throbus	25	17	62	31.23	7.87	144	54.1852	NONE	NONE	NONE	NONE	NONE	0	0	0	0	0	1	0	0	1	0	1		NONE	NONE
10-18-69-67	15 mg daily	15	56	female	65.8	1.545	27.5657	NO	NKA	yes	43313	LV thrombus	no			rivaroxaban	None	TIA, HTN, DM, DCMP, LV thrombus	22	11	127	38.48	9.18	140	48.2533	NONE	NONE	NONE	NONE	NONE	0	0	0	0	0	1	0	0	0	0	1		NONE	NONE
10-20-89-89	15 mg daily	15	56	female	120	1.58	48.0692	NO	NKA	no			yes			rivaroxaban	None	CVA, DM, HTN, epilepsy, Afib, On home Oxygen at sleeping time	35	14	99	34	12	60	205.333	NONE	NONE	NONE	NONE	NONE	0	0	0	0	0	1	0	0	0	0	1		NONE	NONE
10-21-57-67	15 mg daily	15	56	male	77.5	1.69	27.1349	yes	NKA	no			no			rivaroxaban	None	sever Mitral stenosis, sever MR moderate AR , moderate TR, DM	30	28	84	36.68	8.34	78	102.009	NONE	NONE	NONE	NONE	NONE	0	0	0	0	0	0	0	0	0	0	1		NONE	NONE
01-05-15-88	15 mg daily	15	56	female	94.9	1.56	38.9957	NO	NKA	no			yes			rivaroxaban	None	Afib, RHD + MR, HF	54	39	61	28	4.12	54	180.427	NONE	NONE	NONE	NONE	NONE	0	0	0	0	0	0	0	0	0	0	0		NONE	NONE
10-16-00-98	15 mg oral daily	15	56	female	79	1.56	32.4622	NO	NKA	no			yes		a-fib	rivaroxiban	None	DM,HTN,HYPOTHYRODSIM,AF	22	9	51	33.26	3.99	76	106.719	NONE	NONE	NONE	NONE	NONE	0	0	0	0	0	1	1	0	0	0	1		NONE	NONE
01-18-65-27	15 mg oral qpm	15	56	female	86	1.62	32.7694	NO	NKA	no			yes		a-fib	rivaroxiban	clopdogrel 75 mg	DM, ischemic heart dissease,afib	16	9	67	34.82	14.61	66	133.778	NONE	NONE	NONE	NONE	NONE	0	0	0	0	0	0	0	0	0	0	0		NONE	NONE
00-59-66-86	rivaroxaban 15 mg / 1 tab(s) Oral BID	15	56	F	114.2	1.58	45.7459	NO	NKA	Yes	RECURRENT	DVT, PE	NONE	NONE	NONE	RIVA	ASA	RECURREN VTE, +VE JAK2 MUTATION , HTN, IDA,	16	14	80	37.11	5.78	59	198.721	NONE	NONE	NONE	NONE	NONE	0	0	0	0	0	1	0	0	0	0	0		NONE	NONE
00-29-98-44	rivaroxaban 15 mg / 1 tab(s) Oral Daily	15	56	M	64	1.66	23.2254	NO	NKA	NO	NONE	NONE	NONE	NONE	NONE	RIVA	ASA	AFIB, T2DM, DLD, HTN, IHD, CKD	20	17	59	37.16	10.11	158	41.5865	NONE	NONE	NONE	NONE	NONE	0	0	0	0	0	1	1	1	0	0	1		NONE	NONE
00-22-93-44	rivaroxaban 15 mg / 1 tab(s) Oral Daily	15	56	F	106	1.54	44.6956	NO	NKA	NO	NONE	NONE	NONE	NONE	NONE	RIVA	NO	T2DM, CML CHRONIC MYLOID LEUK, HTN, OBESITY, CKD, AFIB. ASD (CATHETER CLOSURE)	18	14	86	29.57	2.82	138	78.8599	NONE	NONE	NONE	NONE	NONE	0	0	0	0	0	1	0	1	0	0	1		NONE	NONE
00-54-04-18	rivaroxaban 15 mg / 1 tab(s) Oral Daily	15	56	F	95	1.55	39.5421	NO	NKA	NO	NONE	NONE	NONE	NONE	NONE	RIVA	NO	T2DM, DLD, BREAT CANCER, ANEMIA, PAROX. AFIB	20	8	70	32.62	3.75	60	162.556	NONE	NONE	NONE	NONE	NONE	0	0	0	0	0	1	0	0	0	0	1		NONE	NONE
10-20-89-89	rivaroxaban 15 mg / 1 tab(s) Tab Oral qPM	15	56	F	120	1.58	48.0692	NO	NKA	NO	NONE	NONE	None	None	None	Rivaroxaban	Aspirin	DM, HTN, AFIB, EPILEPSY, BILATERAL MCA	25	54	115	25.7	15.58	75	164.267	None	None	None	None	None	0	0	0	0	0	1	1	0	1	1	1		NONE	NONE
00-04-76-08	rivaroxaban 15 mg/ 1 tab(s) Oral Daily	15	56	F	47.2	1.59	18.6701	NO	NKA	Yes	OLD	DVT,PE	NONE	NONE	NONE	RIVA	NO	SLE, LUPUS NEPHRITIS, DVT, PE ON WARFARIN	35	14	99	34	12	85	57.0102	NONE	NONE	NONE	NONE	NONE	0	0	0	0	0	0	0	0	0	0	0		NONE	NONE
01-12-80-87	20 mg daily	20	56	female	75	1.6	29.2969	no	NKA	yes		DVT LEG	no			rivaroxaban	None	IDA, hypothyrodism, depression	31	20	99	34.05	4.54	44	175	NONE	NONE	NONE	NONE	NONE	0	0	0	0	0	0	1	1	0	0	1		NONE	NONE
02-01-12-73	20 mg daily	20	56	female	89.9	1.54	37.9069	NO	penicillin G benzathine	no			yes			rivaroxaban	None	Afib, HTN, DM, asthma, hernia	42	30	101	28.82	13.49	42	219.756	NONE	NONE	NONE	NONE	NONE	0	0	0	0	0	1	0	0	0	0	1		NONE	NONE
10-21-70-72	20 mg daily	20	56	female	100	1.67	35.8564	NO	NKA	yes		DVT	no			rivaroxaban	aspirin 81 mg	DM, obese, stroke, DVT	24	20	104	38.99	10.48	84	122.222	NONE	NONE	NONE	NONE	NONE	0	0	0	0	0	0	0	0	0	0	1		NONE	NONE
10-18-16-15	20 mg daily	20	56	male	64	1.74	21.1389	NO	NKA	no			no			rivaroxaban	None	DLD, cardiomyopathy, CHF- DCMP, HTN	41	29	90	36	10.66	72	91.2593	NONE	NONE	NONE	NONE	NONE	0	0	0	0	0	1	0	0	0	1	0		NONE	NONE
02-31-14-51	20 mg daily	20	56	female	86	1.55	35.796	NO	NKA	no			no			rivaroxaban	aspirin, 81 mg, Oral, Daily	DLD HTN, IGT, anxeity	22	23	136	32.99	5.86	43	205.333	NONE	NONE	NONE	NONE	NONE	0	0	0	0	0	1	1	0	0	0	0		NONE	NONE
10-24-23-87	20 mg daily	20	56	male	48	1.6	18.75	NO	NKA	yes	17/10/2019	PE	no			rivaroxaban	None	PE, epigastric pain & persistent nausea and vomitting	37	30	217	18.83	11.52	17	289.882	NONE	NONE	NONE	NONE	NONE	0	0	0	0	0	1	0	0	0	0	0		NONE	NONE
01-02-85-64	20 mg daily	20	56	female	126	1.65	46.281	NO	NKA	no			yes			rivaroxaban	was on plavix 75 mg, Oral, Daily	HTN, Afib, Gall bladder stone, stroke	34	26	127	32.53	11.47	72	179.667	NONE	NONE	NONE	NONE	NONE	0	0	0	0	0	1	0	0	0	0	0		NONE	NONE
01-12-90-75	20 mg daily	20	56	male	59.6	1.59	23.575	no	NKA	no			yes		ATRIAL FLUTTER	rivaroxaban	None	DM, AF, HTN, pain	14	18	70	18	6.69	172	35.5752	NONE	NONE	NONE	NONE	NONE	0	0	0	1	0	0	0	0	0	0	0		NONE	NONE
10-19-33-84	20 mg daily	20	56	female	92	1.68	32.5964	NO	NKA	no			yes			rivaroxaban	None	Afib, foramen magnum meningioma	25	16	100	30.22	5.59	35	269.867	NONE	NONE	NONE	NONE	NONE	0	0	0	0	0	0	0	0	0	0	0		NONE	NONE
01-21-08-87	20 mg daily	20	56	male	90.5	1.67	32.4501	yes	NKA	no			yes	43497		rivaroxaban	None	dilated cardiomyopathy, AFib	28	22	67	38.04	7.76	114	81.5029	NONE	NONE	NONE	NONE	NONE	0	0	0	0	0	0	0	0	0	0	0		NONE	NONE
01-17-85-98	20 mg ora qpm	20	56	female	61	1.47	28.229	NO	NKA	yes		PE	no			rivaroxiban	None	PE,OA	129	110	2043	13.89	232.98	81	77.3169	NONE	NONE	NONE	NONE	NONE	0	0	0	0	0	1	0	0	0	0	1		NONE	NONE
00-96-15-27	20 mg oral tablet Daily	20	56	female	69.1	1.5	30.7111	NO	NKA	yes		PE	no			rivaroxaban	aspirin, 81 mg, Oral, Daily	DM, anxiety	32	0	0	39.5	2.78	48	147.797	NONE	NONE	NONE	NONE	NONE	0	0	0	0	0	1	0	0	0	0	1		NONE	NONE
10-14-18-35	20 mg oral tablet, 1 tab(s), Oral, qPM	20	56	female	78	1.6	30.4687	NO	NKA	no			no			rivaroxiban	None	degree of thrombosis,	54	36	52	28.12	8.7	40	200.2	NONE	NONE	NONE	NONE	NONE	0	0	0	0	0	1	0	0	0	0	0		NONE	NONE
00-04-86-51	rivaroxaban 20 mg / 1 tab(s) Oral QPM	20	56	M	66	1.54	27.8293	NO	NKA	Yes	?	PE	NONE	NONE	NONE	RIVA	NO	SCD, PULMONARY HTN POST PE, MODERATE OSA	48	35	49	37.43	10.05	65	104.246	NONE	NONE	NONE	NONE	NONE	0	0	0	0	0	0	0	0	0	0	0		NONE	NONE
00-23-05-32	rivaroxaban 20 mg/ 1 tab(s) Oral Daily	20	56	M	108	1.7	37.3702	NO	NKA	NO	NONE	NONE	NONE	NONE	NONE	RIVA	NO	RHD DIAGNOSED AT AGE OF 20, HTN, DLD, DM, AFIB, HYPOTHYROIDISM,	30	15	55	35.16	5.5	70	158.4	NONE	NONE	NONE	NONE	NONE	0	0	0	0	0	0	0	1	0	0	1		NONE	NONE
00-52-90-07	rivaroxaban 20 mg/ 1 tab(s) Oral Daily	20	56	M	85	1.68	30.1162	NO	CHICKEN, EGG CONTAINING COMPOUND	Yes	2015	DVT, PE	NONE	NONE	NONE	RIVA	NO	HTN, DM ,IHD, DVT	28	13	73	33.9	5.38	87	100.307	NONE	NONE	NONE	NONE	NONE	0	0	0	0	0	1	0	0	0	0	1		NONE	NONE
00-80-39-89	rivaroxaban 20 mg/ 1 tab(s) Oral Daily	20	56	F	89	1.64	33.0904	NO	RITUXIMAB	NO	NONE	NONE	NONE	NONE	NONE	RIVA	NO	RA, HYPOTHROIDISM, FIBROMYALGIA, PE ON AC	35	14	99	34	12	85	107.498	NONE	NONE	NONE	NONE	NONE	0	0	0	0	0	0	0	1	0	0	0		NONE	NONE
00-81-91-64	rivaroxaban 20 mg/ 1 tab(s) Oral Daily	20	56	M	80	1.66	29.0318	NO	NKA	NO	NONE	NONE	NONE	NONE	NONE	RIVA	ASA	RECURRENT DVT , PATIENT ON WARFARIN	26	19	60	39.88	6.8	135	60.8395	NONE	NONE	NONE	NONE	NONE	0	0	0	0	0	0	0	0	0	0	0		NONE	NONE
00-51-41-68	rivaroxaban 20 mg/ 1 tab(s) Oral Daily	20	56	F	76	1.6	29.6875	NO	NKA	NO	NONE	NONE	NONE	NONE	NONE	RIVA	NO	SLE, HX OF OLD PROVOKED DVT, BILATERAL HIP REPLACEMENT	37	23	133	38.18	6.17	48	162.556	NONE	NONE	NONE	NONE	NONE	0	0	0	0	0	0	0	0	0	0	0		NONE	NONE
00-56-23-65	rivaroxaban 20 mg/ 1 tab(s) Oral Daily	20	56	M	64	1.72	21.6333	YES	NKA	Yes	?	DVT	NONE	NONE	NONE	RIVA	NO	DVT, ALCOHOL AND DRUG ABUSE, EPILEPSY AFTER RTA, HCV POSITIVE, HEPATITIS C.	35	14	99	34	12	85	77.302	NONE	NONE	NONE	NONE	NONE	0	0	0	0	0	0	0	0	0	0	0		NONE	NONE
00-34-02-17	rivaroxaban15MG BID THEN 20 mg/ 1 tab(s) Oral Daily	20	56	F	93	1.69	32.5619	NO	PENICIILIN	Yes	2016	DVT	NONE	NONE	NONE	RIVA	ASA	PROVOKED DVT IN MAY, 2016, FINISH 6MONTHS ANTIC, CHOLECYSTECTOMY	35	14	99	34	12	85	112.329	NONE	NONE	NONE	NONE	NONE	0	0	0	0	0	0	0	0	0	0	0		NONE	NONE
00-98-93-33	15 mg BID oral	30	56	female	75.8	1.55	31.5505	NO	NKA	yes		possible chonic PE	yes		paroximal Afib	rivaroxaban	None	breast CA, pulmonary hypertension, Afib	12	13	52	32	6.36	60	129.702	NONE	NONE	NONE	NONE	NONE	0	0	0	0	0	1	1	0	0	0	1		NONE	NONE
10-24-75-42	rivaroxaban 15 mg / 1 tab(s) Tab Oral BID	30	56	F	80	1.6	31.25	NO	HEPARIN	NO	NONE	NONE	None	None	None	Rivaroxaban	None	T2DM	34	12	46	31.15	7.87	39	210.598	None	None	None	None	None	0	0	0	0	0	1	0	0	1	1	1		NONE	NONE
01-11-81-41	10 mg daily	10	57	female	95.7	1.59	37.8545	NO	NKA	no			no			rivaroxaban	None	HTN, DM, TKR	26	13	132	35.72	4.8	57	170.32	NONE	NONE	NONE	NONE	NONE	0	0	0	0	0	0	0	0	0	0	0		NONE	NONE
02-26-47-16	10 mg daily	10	57	female	76	1.57	30.8329	NO	NKA	no			no			rivaroxaban	None	breast cancer	26	20	108	37.34	13.14	52	148.265	NONE	NONE	NONE	NONE	NONE	0	0	0	0	0	0	0	0	0	0	0		NONE	NONE
10-12-80-96	10 mg oral daily for 25 days	10	57	female	72.5	1.52	31.3798	NO	NKA	no			no			rivaroxiban	None	TKR,DM,	14	15	86	30.1	5.6	61	120.569	NONE	NONE	NONE	NONE	NONE	0	0	0	0	0	0	0	0	0	0	1		NONE	NONE
00-60-52-24	rivaroxaban 10 mg/ 1 tab(s) Oral Daily	10	57	F	81.6	1.547	34.0965	NO	NKA	NO	NONE	NONE	NONE	NONE	NONE	RIVA	NO	HYPOTHYROIDIS, DM, HX OF UNPROVOKED DVT DIAGNOSED IN 11-2016, HTN, GERD, OBESITY, DLD	30	18	124	41.63	14.33	61	135.703	NONE	NONE	NONE	NONE	NONE	0	0	0	0	0	0	0	1	0	0	1		NONE	NONE
00-32-67-81	rivaroxaban 10 mg/ 1 tab(s) Oral Daily	10	57	M	79	1.7	27.3356	YES	NKA	NO	NONE	NONE	NONE	NONE	NONE	RIVA	CLOPI	DM, AFIB, IHD,	60	21	64	40.42	6.38	96	83.4803	NONE	NONE	NONE	NONE	NONE	0	0	0	0	0	1	0	0	1	1	0		NONE	NONE
00-35-75-42	rivaroxaban 10 mg/ 1 tab(s) Oral Daily	10	57	F	50	1.55	20.8117	NO	NKA	NO	NONE	NONE	NONE	NONE	NONE	RIVA	NO	TKR, DLD, RA, HTN	64	63	130	20.61	3.63	76	66.7398	NONE	NONE	NONE	NONE	NONE	0	0	0	0	0	1	1	0	0	0	0		NONE	NONE
00-16-19-72	rivaroxaban 10 mg/ 1 tab(s) Oral Daily	10	57	F	117	1.59	46.2798	NO	NKA	Yes	?	DVT	NONE	NONE	NONE	RIVA	NO	HTN, DVT	16	14	77	32.2	5.3	93	127.624	NONE	NONE	NONE	NONE	NONE	0	0	0	0	0	1	0	0	0	0	0		NONE	NONE
00-01-39-63	rivaroxaban 10 mg/ 1 tab(s) Oral Daily	10	57	F	67.7	1.55	28.179	NO	NKA	NO	NONE	NONE	NONE	NONE	NONE	RIVA	NO	POST SLEEVE GASTERECTOMY, , TOTAL THYROIECTOMY, OA, CA SIMOID COLON RESECTION,	35	30	64	37.84	10.38	60	114.463	NONE	NONE	NONE	NONE	NONE	0	0	0	0	0	0	0	0	0	0	0		NONE	NONE
00-04-99-89	rivaroxaban 10 mg/ 1 tab(s) Oral Daily	10	57	F	75	1.55	31.2175	NO	NKA	NO	NONE	NONE	NONE	NONE	NONE	RIVA	NO	LEFT ANKLE SURGERY	35	14	99	34	12	85	89.5098	NONE	NONE	NONE	NONE	NONE	0	0	0	0	0	0	0	0	0	0	0		NONE	NONE
00-66-22-07	rivaroxaban 10 mg/ 1 tab(s) Oral Daily	10	57	F	80	1.54	33.7325	NO	NKA	NO	NONE	NONE	NONE	NONE	NONE	RIVA	NO	DVT IN 2015, ON WHEEL CHAIR FOR THE LAST 45 YEARS AFTER RTA	29	20	78	34.4	8.07	43	188.734	NONE	NONE	NONE	NONE	NONE	0	0	0	0	0	0	0	0	0	0	0		NONE	NONE
00-17-20-63	rivaroxaban 10 mg/ 1 tab(s) Oral Daily	10	57	F	66.6	1.538	28.1554	NO	NKA	Yes	PREGNANCY INDUCED TWICE	DVT	NONE	NONE	NONE	RIVA	NO	HX OF 2 DVT (PREGNANCY INDUCED) AND ONE STROKE (TIA) WITH RESIDUAL GENERALIZED RIGHT SIDED WEAKNESS	35	14	99	34	12	85	79.4847	NONE	NONE	NONE	NONE	NONE	0	0	0	0	0	0	0	0	0	0	0		NONE	NONE
00-19-65-21	rivaroxaban 10 mg/ 1 tab(s) Oral Daily	10	57	F	83	1.5	36.8889	NO	NKA	Yes	4 YEARS AGO	DVT	NONE	NONE	NONE	RIVA	NO	DVT AFTER HIP REPLACEMENT 4 YEARS AGO	18	13	69	37.04	7.92	47	179.147	NONE	NONE	NONE	NONE	NONE	0	0	0	0	0	0	0	0	0	0	0		NONE	NONE
01-12-22-11	15 mg daily	15	57	male	74.1	1.64	27.5506	NO	NKA	no			yes		atrial flutter	rivaroxaban	aspirin, 81 mg, Oral, Daily, clopedogril 75 mg daily	IHD, DM, HF	15	18	196	28	24.7	81	92.8029	NONE	NONE	NONE	NONE	NONE	0	0	0	0	0	1	0	0	0	1	1		NONE	NONE
02-49-84-28	15 mg daily	15	57	male	70	1.74	23.1206	yes	NKA	yes	18/1/2018	DVT in right arm	no			rivaroxaban	None	DVT	34	24	107	37.77	13.6	93	76.356	NONE	NONE	NONE	NONE	NONE	0	0	0	0	0	1	0	0	0	0	1		NONE	NONE
00-38-46-16	rivaroxaban 15 mg / 1 tab(s) Oral Daily	15	57	M	94.2	1.69	32.982	NO	NKA	NO	NONE	NONE	NONE	NONE	NONE	RIVA	NO	DM, HTN, LVSD EF 40%IN 2013, HF,	35	14	99	34	12	85	112.424	NONE	NONE	NONE	NONE	NONE	0	0	0	0	0	1	0	0	1	0	1		NONE	NONE
00-65-62-48	rivaroxaban 15 mg / 1 tab(s) Oral Daily	15	57	M	130	1.76	41.968	NO	NKA	NO	NONE	NONE	NONE	NONE	NONE	RIVA	ASA	DM , HTN, DLD, PAROX AFIB, IHD	27	17	67	35.6	15.9	78	169.074	NONE	NONE	NONE	NONE	NONE	0	0	0	0	0	1	1	0	0	0	1		NONE	NONE
00-46-22-97	rivaroxaban 15 mg / 1 tab(s) Oral Daily	15	57	F	75	1.65	27.5482	NO	NKA	NO	NONE	NONE	NONE	NONE	NONE	RIVA	NO	DM, HTN, AFIB	35	14	99	34	12	85	89.5098	NONE	NONE	NONE	NONE	NONE	0	0	0	0	0	1	0	0	0	0	1		NONE	NONE
00-21-84-06	rivaroxaban 15 mg / 1 tab(s) Oral Daily	15	57	F	84	1.47	38.8727	NO	NKA	Yes	RECURRENT	DVT	NONE	NONE	NONE	RIVA	NO	HTN, DLD, BA, CKD STAGE II, FACTOR V LEIDEN MUTATION AND PROTEIN CDEFECIENCY WITH RECURRENT HISTORY OF DVT AND SAGGITAL SINUS THROMBOSIS	21	19	69	32.18	4.76	112	76.0833	NONE	NONE	NONE	NONE	NONE	0	0	0	0	0	1	0	0	1	0	0		NONE	NONE
00-57-99-43	rivaroxaban 15 mg / 1 tab(s) Oral Daily	15	57	F	92	1.485	41.7191	NO	NKA	NO	NONE	NONE	NONE	NONE	NONE	RIVA	NO	RECURRENT DVT, LAST DVT 9 YEARS AGO	29	18	114	38.27	7.69	57	163.735	NONE	NONE	NONE	NONE	NONE	0	0	0	0	0	0	0	0	0	0	0		NONE	NONE
00-94-03-01	20 mg TAB, 20 mg	20	57	male	87	1.65	31.9559	NO	NKA	no			no			Rivaroxaban	ASA, 81 mg, Oral, Daily , Clopidogrel 75mg TAB daily	HTM, IHD	31	19	125	40	9.3	96	91.934	NONE	NONE	NONE	NONE	NONE	0	0	0	0	0	0	0	0	0	0	0		NONE	NONE
00-87-95-46	, 20 mg, Oral, qPM	20	57	female	70	1.5	31.1111	NO	NKA	no			yes			rivaroxaban	None	HTN, DM, stroke, Afib	28	15	99	32.68	6.15	63	112.716	NONE	NONE	NONE	NONE	NONE	0	0	0	0	0	1	0	0	0	0	1		NONE	NONE
10-03-70-12	20 mg daily	20	57	male	91	1.73	30.4053	NO	egg-containing compound	yes		bilateral dvt	no			rivaroxaban	None	traumatic head injury, extrdural haemorrhage , subarachnoid haemorrhage, DVT	35	14	99	34	12	85	108.605	NONE	NONE	NONE	NONE	NONE	0	0	0	0	0	1	0	0	0	0	1		NONE	NONE
10-17-32-23	20 mg daily	20	57	female	76.8	1.54	32.3832	NO	NKA	no			yes	2019		rivaroxaban	None	HTN, HFpEF, Afib, BA, IHD	26	14	113	34.34	7.39	71	109.731	NONE	0.44	NONE	NONE	NONE	0	0	0	0	0	1	0	0	0	1	0		NONE	NONE
01-01-55-77	20 mg daily	20	57	male	52	1.75	16.9796	NO	NKA	yes		PE	no			rivaroxaban	aspirin, 81 mg, Oral, Daily	essential thrombocythemia, UIP/IPF, PAH, emphysema, PE	37	28	155	28	5.82	51	103.434	NONE	NONE	NONE	NONE	NONE	0	0	0	0	0	0	0	0	0	0	0		NONE	NONE
01-04-57-25	20 mg daily	20	57	female	54.5	1.49	24.5484	NO	NKA	yes		DVT	no			rivaroxaban	None	Osteoporosis, RA, HTN, DVT	19	13	76	34.01	8.9	72	76.7878	NONE	NONE	NONE	NONE	NONE	0	0	0	0	0	0	0	0	0	0	0		NONE	NONE
10-17-72-07	20 mg daily	20	57	female	78	1.59	30.8532	NO	NKA	yes		Cancer-associated thrombosis	no			rivaroxaban	None	Cancer-associated thrombosis, Rectal cancer, anxiety	21	14	99	42.04	8.44	51	155.15	NONE	NONE	NONE	NONE	NONE	0	0	0	0	0	0	0	0	0	0	0		NONE	NONE
10-00-33-94	20 mg daily	20	57	male	122	1.68	43.2256	NO	NKA	yes	13/5/2015	Bil Massive Provoked PE	no			rivaroxaban	None	PE, TB Pericarditis	25	19	77	37	4.7	64	193.378	NONE	NONE	NONE	NONE	NONE	0	0	0	0	0	0	0	0	0	0	0		NONE	NONE
01-02-82-35	20 mg daily	20	57	male	87	1.66	31.5721	smoker (cannibes)	NKA	no			yes			rivaroxaban	was on aspirin 81 mg daily	IHD, HF, DM	29	27	140	0	4.22	122	72.3415	NONE	NONE	NONE	NONE	NONE	0	0	0	0	0	0	0	0	0	0	0		NONE	NONE
10-14-64-67	20 mg oral daily	20	57	male	63	1.69	22.0581	yes	NKA	no			no			rivaroxiban	None	DM,HTN,CARDIOMYOPATHY,DLD,HEMODIALYSIS,SEVERE LVSD WITH LV CLOTS	16	14	99	39.9	6.99	217	29.4516	NONE	NONE	NONE	NONE	NONE	0	0	0	0	0	1	0	0	0	1	1		NONE	NONE
01-17-87-32	20 mg oral qpm	20	57	female	74.7	1.63	28.1155	NO	NKA	no			no			rivaroxiban	None	non ishcemic cardiomyopathy,LV Dysfunction , RV Dysfunction	22	18	101	41.91	27.22	72	105.249	NONE	NONE	NONE	NONE	NONE	0	0	0	0	0	0	0	0	0	0	0		NONE	NONE
00-92-58-61	20 mg, Oral, qPM	20	57	male	108	1.77	34.4729	NO	NKA	no			yes			rivaroxaban	None	HTN, HF, Afib, obesity, prediabetes	26	0	0	37.4	13.58	98	111.796	NONE	NONE	NONE	NONE	NONE	0	0	0	0	0	0	0	0	0	1	0		NONE	NONE
00-09-73-08	rivaroxaban 20 mg/ 1 tab(s) Oral Daily	20	57	M	105.6	1.81	32.2334	NO	ASA, EGG, PENICIL. STRABERRY, CELEBREX, BANANA	NO	NONE	NONE	NONE	NONE	NONE	RIVA	NO	GBS, T2DM, TN, DLD, PSORIASIS, AXIAL PSORIATIC ARTHRITIS, BENIGN PROSTATIC HYPERTROPHY, IHD, HFpEF	29	23	106	35.94	8.58	89	120.366	NONE	NONE	NONE	NONE	NONE	0	0	0	0	0	1	0	0	0	1	1		NONE	NONE
00-81-95-41	rivaroxaban 20 mg/ 1 tab(s) Oral Daily	20	57	F	103	1.5	45.7778	NO	NKA	NO	NONE	NONE	NONE	NONE	NONE	RIVA	ASA	DLD, HYPOTHYROIDISM, PREDIABESTES, L4L5DISC, PATIENT HAS HX OF DVT 12 YEARS AGO ON ASA AND PLANNING TO GO ON LONG FLIGHT , RIVA WAS ISSUED, OBESITY	26	16	95	34.23	5.4	57	183.312	NONE	NONE	NONE	NONE	NONE	0	0	0	0	0	1	0	1	0	0	0		NONE	NONE
00-09-95-74	rivaroxaban 20 mg/ 1 tab(s) Oral Daily	20	57	M	80	1.72	27.0416	YES	NKA	NO	NONE	NONE	NONE	NONE	NONE	RIVA	ASA	HTN, DLD, AFIB	40	22	107	40.88	5.27	75	108.207	NONE	NONE	NONE	NONE	NONE	0	0	0	0	0	0	1	0	0	0	0		NONE	NONE
00-14-82-39	rivaroxaban 20 mg/ 1 tab(s) Oral Daily	20	57	M	98	1.7	33.91	NO	NKA	Yes	2015	DVT	NONE	NONE	NONE	RIVA	ASA	HYPERPROLACTINEMIA, AZOOSPEMIA, DVT 5 YEARS AGO, ERYTHROCYTOSIS	30	20	102	36.53	12.24	95	104.648	NONE	NONE	NONE	NONE	NONE	0	0	0	0	0	0	0	0	0	0	0		NONE	NONE
00-43-35-40	rivaroxaban 20 mg/ 1 tab(s) Oral Daily	20	57	F	60	1.49	27.0258	YES	NKA	Yes	2019	DVT	NONE	NONE	NONE	RIVA	ASA THEN STOP	LL DVT, ANEXIETY	21	17	125	34.61	4.26	66	92.2222	NONE	NONE	NONE	NONE	NONE	0	0	0	0	0	0	0	0	0	0	0		NONE	NONE
00-11-06-32	rivaroxaban 20 mg/ 1 tab(s) Oral Daily	20	57	F	85.9	1.63	32.3309	NO	NKA	NO	NONE	NONE	NONE	NONE	NONE	RIVA	NO	BREAST CA, PE, MIGRAIN	61	31	106	30.11	6.71	66	132.031	NONE	NONE	NONE	NONE	NONE	0	0	0	0	0	0	0	0	0	0	0		NONE	NONE
00-02-31-84	rivaroxaban 20 mg/ 1 tab(s) Oral Daily	20	57	M	111	1.59	43.9065	NO	NKA	NO	NONE	NONE	NONE	NONE	NONE	RIVA	NO	AFIB,	19	20	54	34.26	6.77	83	135.667	NONE	NONE	NONE	NONE	NONE	0	0	0	0	0	0	0	0	0	0	0		NONE	NONE
00-78-34-48	rivaroxaban 20 mg/ 1 tab(s) Oral Daily	20	57	M	80	1.66	29.0318	NO	NKA	NO	NONE	NONE	NONE	NONE	NONE	RIVA	NO	AFIB	35	14	99	34	12	85	95.4771	NONE	NONE	NONE	NONE	NONE	0	0	0	0	0	0	0	0	0	0	0		NONE	NONE
00-99-75-88	15 mg BID	30	57	female	67	1.57	27.1816	NO	NKA	yes		femoral empolism	no			rivaroxaban	aspirin 81 mg daily	HTN, DLP	28	12	80	36.52	3.89	71	95.7293	NONE	NONE	NONE	NONE	NONE	0	0	0	0	0	0	0	0	0	0	0		NONE	NONE
10-19-16-78	10 mg daily	10	58	female	78.3	1.48	35.7469	NO	NKA	no			no			rivaroxaban	None	B/L knee replacement, DM, HTN, Rheumatoid arthritis, knee OA	26	17	118	36.16	10.85	65	120.729	NONE	NONE	NONE	NONE	NONE	0	0	0	0	0	1	0	0	0	0	1		NONE	NONE
10-09-27-40	10 mg daily	10	58	male	88	1.69	30.8112	NO	fish	no			no			rivaroxaban	None	TKR	26	16	141	36.36	8.9	89	99.0961	NONE	NONE	NONE	NONE	NONE	0	0	0	0	0	0	1	0	0	0	0		NONE	NONE
01-02-91-07	10 mg daily	10	58	female	73	1.65	26.8136	NO	NKA	no			no			rivaroxaban	None	OP RIGHT ANKLE	19	16	50	30.87	5.2	60	121.937	NONE	NONE	NONE	NONE	NONE	0	0	0	0	0	0	0	0	0	0	0		NONE	NONE
10-00-77-47	10 mg daily	10	58	male	90.4	1.61	34.8752	NO	NKA	yes		Rt upper limb DVT provoked by PICC line	no			rivaroxaban	None	Precursor B-cell ALL, Liver infiltration, Major depressive disorder, Bilateral cystic lesions of the kidneys, DVT	0	45	77	24	335.14	197	45.9903	NONE	NONE	NONE	NONE	NONE	0	0	0	0	0	0	0	0	0	0	0		NONE	NONE
00-88-21-62	10 mg, Oral, Daily	10	58	female	91	1.59	35.9954	NO	NKA	no			no			rivaroxaban	None	TKR, DLE, OA knees	22	18	156	35.74	6.58	46	198.266	NONE	NONE	NONE	NONE	NONE	0	0	0	0	0	0	0	0	0	0	0		NONE	NONE
00-22-98-00	rivaroxaban 10 mg/ 1 tab(s) Oral Daily	10	58	F	89	1.47	41.1865	NO	NKA	NO	NONE	NONE	NONE	NONE	NONE	RIVA	NO	DM, HTN, BILATERAL OA, TKR OF BOTH	20	16	89	28.96	5.58	51	174.898	NONE	NONE	NONE	NONE	NONE	0	0	0	0	0	1	0	0	0	0	1		NONE	NONE
00-30-60-62	rivaroxaban 10 mg/ 1 tab(s) Oral Daily	10	58	F	77.4	1.577	31.1227	NO	NKA	NO	NONE	NONE	NONE	NONE	NONE	RIVA	NO	TKR, HTN, OA, OSTEAPENIA, DM	11	11	103	32.59	4.23	55	141.04	NONE	NONE	NONE	NONE	NONE	0	0	0	0	0	1	0	0	0	0	1		NONE	NONE
00-08-33-66	rivaroxaban 10 mg/ 1 tab(s) Oral Daily	10	58	F	91.4	1.54	38.5394	NO	NKA	Yes	30 YEARS BACK, PE	PROVOKED DVT	NONE	NONE	NONE	RIVA	NO	BA, DM, GERD, HTN, DVT, HEPATITIS C, PE,OBESITY	31	22.23	72	31.55	4.68	71	129.018	NONE	NONE	NONE	NONE	NONE	0	0	0	0	0	1	0	0	0	0	1		NONE	NONE
00-62-93-11	rivaroxaban 10 mg/ 1 tab(s) Oral Daily	10	58	F	86	1.55	35.796	NO	MORPHINE	NO	NONE	NONE	NONE	NONE	NONE	RIVA	NO	TKR, DM	35	14	99	34	12	85	101.401	NONE	NONE	NONE	NONE	NONE	0	0	0	0	0	0	0	0	0	0	1		NONE	NONE
00-00-02-27	rivaroxaban 10 mg/ 1 tab(s) Oral Daily	10	58	F	84	1.575	33.8624	NO	NKA	NO	NONE	NONE	NONE	NONE	NONE	RIVA	NO	DM, HTN, IHD, BILATERAL TKR	29	14	99	34.6	6.83	62	135.785	NONE	NONE	NONE	NONE	NONE	0	0	0	0	0	0	0	0	0	0	1		NONE	NONE
00-00-20-22	rivaroxaban 10 mg/ 1 tab(s) Oral Daily	10	58	F	71	1.48	32.4142	NO	NKA	NO	NONE	NONE	NONE	NONE	NONE	RIVA	NO	TKR, HTN, BA	35	14	99	34	12	85	83.715	NONE	NONE	NONE	NONE	NONE	0	0	0	0	0	1	0	0	0	0	0		NONE	NONE
00-30-56-13	rivaroxaban 10 mg/ 1 tab(s) Oral Daily	10	58	F	111	1.61	42.8224	NO	NKA	NO	NONE	NONE	NONE	NONE	NONE	RIVA	ASA	IN 2018 FRACTURE OF LEFT FEMUR GREATER TROCHANTER WITH INTERTROCHANTERIC EXTENSION	27	19	140	30.76	3.51	89	124.996	NONE	NONE	NONE	NONE	NONE	0	0	0	0	0	0	0	0	0	0	0		NONE	NONE
00-04-39-82	rivaroxaban 10 mg/ 1 tab(s) Oral Daily	10	58	F	75	1.49	33.7823	NO	NKA	NO	NONE	NONE	NONE	NONE	NONE	RIVA	NO	TKR	41	14	99	35.3	3.16	61	123.224	NONE	NONE	NONE	NONE	NONE	0	0	0	0	0	0	0	0	0	0	0		NONE	NONE
00-24-62-65	rivaroxaban 10 mg/ 1 tab(s) Oral Daily	10	58	M	87.3	1.64	32.4584	NO	NKA	NO	NONE	NONE	NONE	NONE	NONE	RIVA	NO	TKR	35	14	99	34	12	85	102.934	NONE	NONE	NONE	NONE	NONE	0	0	0	0	0	0	0	0	0	0	0		NONE	NONE
00-51-27-91	rivaroxaban 10 mg/ 1 tab(s) Oral Daily	10	58	M	87	1.77	27.7698	NO	NKA	NO	NONE	NONE	NONE	NONE	NONE	RIVA	NO	APS, SUBACUTE BILATERAL ADRENAL HEMORHAGE, HE WAS ON WARFARN FOR YEARS BUT FEB, 2020 THEY SHIFT HIM ON RIVAROXABAN AND HE WAS DEVELPOED GENERALIZE FATIGUE, MUCSLE ACHE AND DARKENING OF THE SKIN	23	10	73	36.08	10.02	94	92.7589	NONE	NONE	NONE	NONE	NONE	0	0	0	0	0	0	0	0	0	0	0		NONE	NONE
10-14-89-11	15 mg oral daily	15	58	female	99	1.58	39.6571	NO	NKA	no			no			rivaroxiban	aspirin 81 mg	CAD,DM,	16	11	127	33.36	9.37	93	106.688	NONE	NONE	NONE	NONE	NONE	0	0	0	0	0	0	0	0	0	0	1		NONE	NONE
00-22-52-99	rivaroxaban 15 mg / 1 tab(s) Oral Daily	15	58	F	88.4	1.6	34.5312	NO	NKA	NO	NONE	NONE	NONE	NONE	NONE	RIVA	ASA	T2DM, HTN, DLD, AFIB, ALLERGIC RHINITIS, TOTAL HYSTERECTOMY	40	20	65	41.22	8.19	44	201.356	NONE	NONE	NONE	NONE	NONE	0	0	0	0	0	0	1	0	0	0	1		NONE	NONE
00-48-53-93	rivaroxaban 15 mg / 1 tab(s) Oral Daily	15	58	F	65	1.56	26.7094	NO	NKA	Yes	16 & 18 YEARS BACK	DVT	NONE	NONE	NONE	RIVA	NO	BREAST CA, DVT, HYPOTHYROIDISM	29	19	109	41.66	8.18	57	114.288	NONE	NONE	NONE	NONE	NONE	0	0	0	0	0	0	0	1	0	0	0		NONE	NONE
10-21-32-95	20 mg daily	20	58	female	84	1.59	33.2265	NO	NKA	no			yes			rivaroxaban	None	HTN, DM, DLD, AF, Hypothyroidism	38	20	51	38.62	11.18	67	125.652	NONE	NONE	NONE	NONE	NONE	0	0	0	0	0	1	0	1	0	0	1		NONE	NONE
10-06-07-21	20 mg daily	20	58	male	65.1	1.71	22.2633	NO	NKA	yes		provoked PE	no			rivaroxaban	None	PE, HTN, DM	27	15	54	35	6.12	78	83.647	NONE	NONE	NONE	NONE	NONE	0	0	0	0	0	0	1	0	0	0	0		NONE	NONE
10-21-60-03	20 mg daily	20	58	male	91.8	1.63	34.5515	NO	CIPROFLOXACIN	no			no			rivaroxaban	None	bowel ischemia, HTN	35	28	70	34.2	16.07	113	81.4195	NONE	NONE	NONE	NONE	NONE	0	0	0	0	0	1	0	0	0	0	0		NONE	NONE
01-08-82-46	20 mg daily	20	58	female	97.4	1.56	40.023	NO	NKA	yes		DVT	no			rivaroxaban	None	HF, HTN, CML and DVT	21	21	98	37.19	4.88	163	59.8874	NONE	NONE	NONE	NONE	NONE	0	0	0	0	0	1	0	0	0	0	0		NONE	NONE
10-00-26-43	20 mg daily	20	58	male	98.8	1.72	33.3964	NO	NKA	no			yes			rivaroxaban	None	DM, HTN, AF	29	0	0	38	7.96	119	83.2097	NONE	NONE	NONE	NONE	NONE	0	0	0	0	0	1	0	0	0	0	0		NONE	NONE
10-22-23-64	20 mg daily	20	58	male	108.5	1.73	36.2525	NO	NKA	no			yes			rivaroxaban	None	Afib, HTN	28	0	0	37.8	21.81	89	122.181	NONE	NONE	NONE	NONE	NONE	0	0	0	0	0	1	0	0	0	0	0		NONE	NONE
01-13-18-52	20 mg daily	20	58	male	59	1.6	23.0469	no	NKA	no			no			rivaroxaban	None	HTN	19	18	69	38.51	9.36	99	59.7284	NONE	NONE	NONE	NONE	NONE	0	0	0	0	0	0	0	0	0	0	0		NONE	NONE
01-10-24-10	20 mg daily	20	58	male	97	1.7	33.564	NO	NKA	yes		JUGULAR THROMBOSIS	no			rivaroxaban	None	JUGULAR THROMBOSIS, CERVICAL LYMPHADENOPATHY	23	24	127	36	4.64	72	135.022	NONE	NONE	NONE	NONE	NONE	0	0	0	0	0	0	0	0	0	0	0		NONE	NONE
10-15-84-00	20 mg oral daily	20	58	female	85.6	1.51	37.5422	NO	NKA	no			no			rivaroxiban	None	TKR	13	18	54	31.18	8.34	48	178.73	NONE	NONE	NONE	NONE	NONE	0	0	0	0	0	0	0	0	0	0	0		NONE	NONE
00-87-78-37	20 mg oral tablet, 1 tab(s), Oral, Daily	20	58	female	58	1.51	25.4375	NO	NKA	yes			no			rivaroxaban	aspirin, 81 mg, Oral, Daily	HTN, DM, CVA, DVT, hip C	17	0	0	31.3	2.89	104	55.8932	NONE	NONE	NONE	NONE	NONE	0	0	0	0	0	1	0	0	0	0	1		NONE	NONE
10-11-67-58	20 mg oral tablet, 1 tab(s), Oral, qPM	20	58	female	60	1.47	27.7662	NO	NKA	no			yes		A-fib	rivaroxiban	None	HTN,AFIB,CATH	21	14	99	37.7	13.06	82	73.3333	NONE	NONE	NONE	NONE	NONE	0	0	0	0	0	1	0	0	0	0	1		NONE	NONE
10-12-99-62	20 mg oral tablet, 1 tab(s), Oral, qPM	20	58	female	87	1.56	35.7495	NO	NKA	no			no			rivaroxiban	None	Haglund deformity right heel	35	14	99	34	12	60	145.322	NONE	NONE	NONE	NONE	NONE	0	0	0	0	0	0	1	1	0	0	0		NONE	NONE
10-11-96-26	20 mg oral tablet, 1 tab(s), Oral, qPM	20	58	male	110.75	1.74	36.5801	NO	NKA	yes		PE,DVT	no			rivaroxiban	None	TKR,PEDLD,HTN,DM,DVT	32	17	99	33.35	5.73	86	129.065	NONE	NONE	NONE	NONE	NONE	0	0	0	0	0	0	0	0	0	0	0		NONE	NONE
00-00-86-24	rivaroxaban 20 mg / 1 tab(s) Oral QPM	20	58	F	90	1.57	36.5126	NO	NKA	Yes	2019	PE	NONE	NONE	NONE	RIVA	ASA	T2DM, HTN, DLD, HFpEF	58	14	99	31.5	5.07	88	102.5	NONE	NONE	NONE	NONE	NONE	0	0	0	0	0	1	0	0	0	1	1		NONE	NONE
01-18-55-56	rivaroxaban 20 mg/ 1 tab(s) Oral Daily	20	58	F	76	1.44	36.6512	NO	NKA	NO	NONE	NONE	None	None	None	Rivaroxaban	None	HTN, OSTEOPOROSIS, ILD exacerbation, SCLERODERMA, NON SPECIFIC INTERSTITIAL PNEUMONIA.	14	12	56	24.22	3.28	78	97.6524	None	None	None	None	None	0	0	0	0	0	1	1	0	1	1	1		NONE	NONE
00-89-63-81	rivaroxaban 20 mg/ 1 tab(s) Oral Daily	20	58	M	99	1.7	34.2561	NO	NKA	NO	NONE	NONE	yes	None	Afib	Rivaroxaban	None	HTN, DLD, COPD, Afib, HYPOXIA	24	22	64	32	34.66	108	91.8704	None	None	None	None	None	0	0	0	0	0	0	0	1	0	1	1		NONE	NONE
00-18-15-72	rivaroxaban 20 mg/ 1 tab(s) Oral Daily	20	58	F	109.8	1.586	43.6512	NO	NKA	Yes	2017	DVT	NONE	NONE	NONE	RIVA	NO	HTN, DM, HYPOTHYROIDISM AFIB, DLD, STROKE AND DVT	39	48	234	27.76	8.36	84	131.005	NONE	NONE	NONE	NONE	NONE	0	0	0	0	0	0	0	1	0	0	1		NONE	NONE
00-01-03-82	rivaroxaban 20 mg/ 1 tab(s) Oral Daily	20	58	F	77	1.6	30.0781	NO	NKA	NO	NONE	NONE	NONE	NONE	NONE	RIVA	ASA	DM, HTN, DLD, IHD, VITREAOUS HEMORRHAGE POST MULTIPLE LASE TREATMENT,	23	15	96	26.59	4.37	64	120.58	NONE	NONE	NONE	NONE	NONE	0	0	0	0	0	1	0	0	0	0	1		NONE	NONE
00-50-20-98	rivaroxaban 20 mg/ 1 tab(s) Oral Daily	20	58	F	74.5	1.58	29.843	NO	NKA	NO	NONE	NONE	NONE	NONE	NONE	RIVA	NO	AFIB, CHADSS2-VASC3 , HTN, DM	22	13	86	33.16	7.41	72	103.702	NONE	NONE	NONE	YES	NONE	0	0	0	0	0	1	0	0	0	0	1		NONE	NONE
00-52-95-22	rivaroxaban 20 mg/ 1 tab(s) Oral Daily	20	58	F	77	1.57	31.2386	NO	IBUPROFEN,	Yes	2018	UNPROVOKED DVT	NONE	NONE	NONE	RIVA	ASA	NMIGRAINE, BA, T2DM, DVT UNPROVOKED IN 2018	32	20	61	35.78	9.4	72	107.182	NONE	NONE	NONE	NONE	NONE	0	0	0	0	0	0	0	0	0	0	1		NONE	NONE
00-81-29-68	rivaroxaban 20 mg/ 1 tab(s) Oral Daily	20	58	F	110.5	1.62	42.1049	NO	NKA	NO	NONE	NONE	NONE	NONE	NONE	RIVA	NO	AFIB, DLD, HTN	25	17	92	34.62	7.57	48	230.72	NONE	NONE	NONE	NONE	NONE	0	0	0	0	0	1	1	0	0	0	0		NONE	NONE
00-40-77-44	rivaroxaban 20 mg/ 1 tab(s) Oral Daily	20	58	M	75	1.68	26.5731	NO	NKA	NO	NONE	NONE	NONE	NONE	NONE	RIVA	ASA	IHD, HTN	35	14	99	34	12	85	88.4314	NONE	NONE	NONE	NONE	NONE	0	0	0	0	0	1	0	0	0	0	0		NONE	NONE
00-46-41-41	rivaroxaban 20 mg/ 1 tab(s) Oral Daily	20	58	F	80	1.6	31.25	NO	NKA	Yes	?	DVT	NONE	NONE	NONE	RIVA	NO	DEPRESSION, HTN, CHRONIC BILATERAL LL DVT	35	14	99	34	12	85	94.3268	NONE	NONE	NONE	NONE	NONE	0	0	0	0	0	1	0	0	0	0	0		NONE	NONE
00-15-77-22	rivaroxaban 20 mg/ 1 tab(s) Oral Daily	20	58	M	80	1.76	25.8264	NO	NKA	NO	NONE	NONE	NONE	NONE	NONE	RIVA	ASA	TB, DVT	30	24	118	35.41	8.35	61	131.439	NONE	NONE	NONE	NONE	NONE	0	0	0	0	0	0	0	0	0	0	0		NONE	NONE
00-78-51-27	rivaroxaban 20 mg/ 1 tab(s) Oral Daily	20	58	M	88.3	1.73	29.5032	NO	NKA	Yes	?	DVT	NONE	NONE	NONE	RIVA	NO	PATIENT ON WARFARIN CURRENTLY, AFIB, RHD, DILATED LA, HISTORY OF BALLON VALVULOPLASTY, HX OF DVT	35	14	99	34	12	85	104.113	NONE	NONE	NONE	NONE	NONE	0	0	0	0	0	0	0	0	0	0	0		NONE	NONE
10-24-62-61	10 mg daily	10	59	female	77.2	1.49	34.7732	NO	NKA	no			no			rivaroxaban	None	OA, DM, TKR, HTN	39	39	113	25.77	7.06	53	144.204	NONE	NONE	NONE	NONE	NONE	0	0	0	0	0	1	0	0	0	0	1		NONE	NONE
01-02-53-44	10 mg daily	10	59	female	77.8	1.486	35.2324	NO	NKA	no			no			rivaroxaban	None	DLP, osteopenia, OA	23	25	79	24.44	8.02	67	114.958	NONE	NONE	NONE	NONE	NONE	0	0	0	0	0	0	0	0	0	0	1		NONE	NONE
10-21-11-44	10 mg daily	10	59	female	92.7	1.525	39.8603	NO	NKA	no			no			rivaroxaban	None	HTN, PUD, bilateral knee pain	20	26	107	33.88	14.59	56	163.88	NONE	NONE	NONE	NONE	NONE	0	0	0	0	0	1	0	0	0	0	0		NONE	NONE
10-13-20-98	10 mg oral daily	10	59	male	78	1.76	25.1808	NO	NKA	no			no			rivaroxiban	asprin 81 mg	right MCA stroke ,DM,HTN	27	18	76	37.83	19.89	62	124.548	NONE	NONE	NONE	NONE	NONE	0	0	0	0	0	1	1	0	0	0	1		NONE	NONE
10-16-33-19	10 mg oral daily	10	59	female	97	1.54	40.9007	NO	NKA	no			no			rivaroxiban	None	TKR,HTN	27	17	76	31.07	26.59	86	111.663	NONE	NONE	NONE	NONE	NONE	0	0	0	0	0	1	0	0	0	0	0		NONE	NONE
10-14-93-63	10 mg oral daily	10	59	female	100	1.56	41.0914	NO	NKA	no			no			rivaroxiban	None	TKR	34	53	78	24.91	5.71	40	247.5	NONE	NONE	NONE	NONE	NONE	0	0	0	0	0	0	0	0	0	0	0		NONE	NONE
00-10-19-15	rivaroxaban 10 mg Oral Daily	10	59	F	78	1.58	31.245	NO	NKA	NO	NONE	NONE	NONE	NONE	NONE	RIVA	NO	MEDICALLY FREE, POST BILATERAL EVLT, TKR	53	25	80	31.3	14.43	48	160.875	NONE	NONE	NONE	NONE	NONE	0	0	0	0	0	0	0	0	0	0	0		NONE	NONE
00-55-85-18	rivaroxaban 10 mg/ 1 tab(s) Oral Daily	10	59	F	109	1.6	42.5781	NO	NKA	NO	NONE	NONE	NONE	NONE	NONE	RIVA	NO	DM, HTN, TKR, BA, DLD,	28	47	368	33.6	6.72	89	121.247	NONE	NONE	NONE	NONE	NONE	0	0	0	0	0	1	1	0	0	0	1		NONE	NONE
00-23-10-99	rivaroxaban 10 mg/ 1 tab(s) Oral Daily	10	59	F	90	1.59	35.5999	NO	NKA	NO	NONE	NONE	NONE	NONE	NONE	RIVA	NO	DM, DLD, HALLUX VALGUS CORRECTION	17	14	85	42.75	3.07	51	174.706	NONE	NONE	NONE	NONE	NONE	0	0	0	0	0	1	0	0	0	0	1		NONE	NONE
00-76-79-93	rivaroxaban 10 mg/ 1 tab(s) Oral Daily	10	59	M	71	1.61	27.3909	NO	BANANA, EGG	NO	NONE	NONE	NONE	NONE	NONE	RIVA	NO	DM, HTN, KNEE AND DISTAL FEMUR MEGAPROSTHESIS (GMRS), OA,	35	14	99	34	12	85	82.6941	NONE	NONE	NONE	NONE	NONE	0	0	0	0	0	1	0	0	0	0	1		NONE	NONE
00-65-83-29	rivaroxaban 10 mg/ 1 tab(s) Oral Daily	10	59	F	114.6	1.63	43.133	NO	NKA	NO	NONE	NONE	NONE	NONE	NONE	RIVA	ASA	DLD, HTN, HYPOTHYROIDISM, IHD, TKE IN 5-2019	21	15	48	32.14	10.76	60	189.09	NONE	NONE	NONE	NONE	NONE	0	0	0	0	0	1	0	1	0	0	0		NONE	NONE
00-02-44-71	rivaroxaban 10 mg/ 1 tab(s) Oral Daily	10	59	F	100	1.59	39.5554	NO	NKA	NO	NONE	NONE	NONE	NONE	NONE	RIVA	NO	LEFT FLAT FOOT RECONSTRUCTION , HYPOTHYROIDISM	20	14	92	37.14	6.06	58	170.69	NONE	NONE	NONE	NONE	NONE	0	0	0	0	0	1	1	0	0	0	0		NONE	NONE
00-25-81-24	rivaroxaban 10 mg/ 1 tab(s) Oral Daily	10	59	M	114.2	1.61	44.0569	NO	NKA	Yes	2010	PE	NONE	NONE	NONE	RIVA	NO	SLE, PE	38	20	88	38.46	6.36	93	121.568	NONE	NONE	NONE	NONE	NONE	0	0	0	0	0	0	0	0	0	0	0		NONE	NONE
10-03-28-43	15 mg daily	15	59	female	96.7	1.67	34.6732	NO	NKA	no			no			rivaroxaban	None	DM, HTN, DLD, TKR	26	13	81	39.42	5.79	82	116.748	NONE	NONE	NONE	NONE	NONE	0	0	0	0	0	1	1	0	0	0	1		NONE	NONE
10-24-61-94	15 mg daily	15	59	female	85.5	1.55	35.5879	NO	penicillin	no			no			rivaroxaban	None	Aortic stenosis, DM, HTN, Hypothyrodism	13	16	47	27.68	7.51	40	211.613	NONE	NONE	NONE	NONE	NONE	0	0	0	0	0	1	1	0	0	0	1		NONE	NONE
10-22-61-26	15 mg daily	15	59	male	101	1.62	38.485	NO	NKA	no			yes			rivaroxaban	None	SVT, Afib	27	18	63	34.09	10.73	77	129.857	NONE	NONE	NONE	NONE	NONE	0	0	0	0	0	0	0	0	0	0	0		NONE	NONE
00-87-56-10	15 mg oral tablet, 1 tab(s), Oral, Daily	15	59	male	65.4	1.75	21.3551	NO	NKA	no			yes			rivaroxaban	None	HTN, SLE, HD, Afib	21	30	158	30	55.18	139	46.5799	NONE	NONE	NONE	NONE	NONE	0	0	0	0	0	1	0	0	0	0	0		NONE	NONE
00-89-63-81	15 mg oral tablet, 1 tab(s), Oral, qPM	15	59	male	101	1.71	34.5405	NO	NKA	no			yes			rivaroxaban	None	COPD, OSA, Pulmonary HTN, Afib	17	25	121	37.52	40.74	112	89.2768	NONE	NONE	NONE	NONE	NONE	0	0	0	0	0	1	1	0	0	0	0		NONE	NONE
00-65-11-47	rivaroxaban 15 mg / 1 tab(s) Oral Daily	15	59	F	100.9	1.498	44.9643	NO	NKA	NO	NONE	NONE	NONE	NONE	NONE	RIVA	NO	BA, OLD PE, BREAST CANCER,	27	21	116	34.08	7.31	41	243.637	NONE	NONE	NONE	NONE	NONE	0	0	0	0	0	0	0	0	0	0	0		NONE	NONE
10-00-63-22	20 mg daily	20	59	female	102	1.57	41.381	NO	NKA	no			yes		atrial flutter	rivaroxaban	aspirin, 81 mg, Oral, Daily	HTN, AF, RHEUMATIC HART DISEASE	32	28	116	34	6.33	60	168.3	NONE	NONE	NONE	NONE	NONE	0	0	0	0	0	1	0	0	0	1	1		NONE	NONE
10-10-61-71	20 mg daily	20	59	male	60	1.58	24.0346	NO	Perfume	no			yes			rivaroxaban	None	DM, HTN, NON-ISCHEMIC CARDIOMYOPATHY BASED ON CATH, Afib,	32	31	126	35.46	15.2	96	61.875	NONE	NONE	NONE	NONE	NONE	0	0	0	0	0	0	0	0	0	1	1		NONE	NONE
10-17-94-82	20 mg daily	20	59	male	85.4	1.62	32.5408	NO	NKA	yes	43405	right portal vein thrombosis	no			rivaroxaban	None	DM, HTN, STAGE 2 COLON CANCER,	20	22	94	36.4	5.71	77	109.8	NONE	NONE	NONE	NONE	NONE	0	0	0	0	0	1	0	0	0	0	1		NONE	NONE
02-48-16-24	20 mg daily	20	59	female	98	1.71	33.5146	NO	NKA	no			yes	43241	paroxysmal Atrial fibrillation	rivaroxaban	None	DLD, HTN, prediabetes, AR,HYPOTHYROIDISM, PAF	38	24	103	41.22	9.68	56	173.25	NONE	NONE	NONE	NONE	NONE	0	0	0	0	0	1	0	0	0	0	1		NONE	NONE
01-12-48-15	20 mg daily	20	59	male	61	1.54	25.721	no	NKA	yes		DVT	no			rivaroxaban	was on aspirin, 81 mg, Oral, Daily, clopidogrel 75 mg daily	Adrenal Insufficiency, DM, IHD, OA	10	47	393	16.96	26.11	60	100.65	NONE	NONE	NONE	NONE	NONE	0	0	0	0	0	1	0	0	0	0	1		NONE	NONE
10-04-99-18	20 mg daily	20	59	male	67	1.64	24.9108	NO	NKA	no			no			rivaroxaban	aspirin, 81 mg, Oral, Daily	Unifocal PVCs, DM	28	22	47	36.07	9.19	67	99	NONE	NONE	NONE	NONE	NONE	0	0	0	0	0	0	0	0	0	0	1		NONE	NONE
10-06-08-14	20 mg daily	20	59	male	67.5	1.7	23.3564	yes	NKA	no			yes			rivaroxaban	None	IHD, AF, MODERATE LV DYSFUNCTION	121	50	567	36	10.17	76	87.9276	NONE	NONE	NONE	NONE	NONE	0	0	0	0	0	0	0	0	0	0	1		NONE	NONE
10-10-83-56	20 mg daily	20	59	female	63	1.61	24.3046	NO	NKA	yes		cardiac thrombus	no			rivaroxaban	None	restrictive cardiomyopathy	13	22	70	25.6	5.11	66	94.5	NONE	NONE	NONE	NONE	NONE	0	0	0	0	0	1	0	0	0	1	0		NONE	NONE
01-12-65-96	20 mg daily	20	59	male	80	1.6	31.25	quite smoking	NKA	yes			no			rivaroxaban	None		47	21	94	46.56	12.94	81	97.7778	NONE	NONE	NONE	NONE	NONE	0	0	0	0	0	1	0	0	1	0	0		NONE	NONE
10-06-87-80	20 mg daily	20	59	male	105.6	1.72	35.695	NO	NKA	no			no			rivaroxaban	aspirin, 81 mg, Oral, Daily	HTN, HF	16	13	98	34	7.24	95	110.046	NONE	NONE	NONE	NONE	NONE	0	0	0	0	0	1	0	0	0	0	0		NONE	NONE
01-12-78-19	20 mg daily	20	59	female	86.5	1.545	36.2376	no	NKA	no			no			rivaroxaban	None	HTN, DLD, DM, stroke	26	17	103	36.11	5.27	80	107.044	NONE	NONE	NONE	NONE	NONE	0	0	0	0	0	0	0	0	0	0	0		NONE	NONE
10-10-29-58	20 mg daily	20	59	female	64	1.47	29.6173	NO	NKA	yes		Axillary thrombosis	no			rivaroxaban	None	segmental small bowel resection, carcinoid lung tumor, anxiety, abdominal pain,	35	20	108	39.74	5.1	48	132	NONE	NONE	NONE	NONE	NONE	0	0	0	0	0	0	0	0	0	0	0		NONE	NONE
10-19-68-54	20 mg daily	20	59	male	61.8	1.77	19.7261	NO	NKA	yes		Chronic DVT, Right superficial cephalic vein thrombosis	no			rivaroxaban	None	Post thrombotic syndrome	28	31	70	38.4	9.87	70	87.4029	NONE	0.29	NONE	NONE	NONE	0	0	0	0	0	0	0	0	0	0	0		NONE	NONE
01-12-93-73	20 mg daily	20	59	male	57	1.585	22.6891	no	NKA	no			yes			rivaroxaban	None	RESTRICTIVE CARDIOMYOPATHY, SEVERE DERMATITIS, Afib	39	44	333	21.07	9.98	87	64.8621	NONE	NONE	NONE	NONE	NONE	0	0	0	0	0	0	0	0	0	0	0		NONE	NONE
10-05-36-04	20 mg daily	20	59	male	73	1.74	24.1115	NO	penicillin & Sulfa, egg & eggplant	no			yes		PAF	rivaroxaban	None	AF	28	15	80	38.22	13.72	90	80.3	NONE	NONE	NONE	NONE	NONE	0	0	0	0	0	0	0	0	0	0	0		NONE	NONE
01-16-46-15	20 mg daily qpm	20	59	female	75.5	1.51	33.1126	NO	NKA	no			yes		A-FIB	rivaroxiban	None	OA,A-fib	21	20	92	42.87	16.66	53	141.028	NONE	NONE	NONE	NONE	NONE	0	0	0	0	0	0	0	0	0	1	1		NONE	NONE
10-15-12-16	20 mg oral daily	20	59	male	92	1.73	30.7394	NO	NKA	yes		DVT	no			rivaroxiban	None	DVT,multiple thrombi emboli in descending thoracic aorta,	36	20	122	38.56	11.53	95	95.8737	NONE	NONE	NONE	NONE	NONE	0	0	0	0	0	0	0	0	0	0	0		NONE	NONE
00-86-08-37	20 mg oral tablet	20	59	female	100	1.62	38.1039	NO	NKA	yes		pulmonary edema secondary to NSTEMI (type II MI)	no			rivaroxaban	aspirin, 81 mg, plavix 75 mg	HTN, DM, CKD, PVD	44	29	99	34	12	187	52.9412	NONE	NONE	NONE	NONE	NONE	0	0	0	0	0	1	0	1	0	0	1		NONE	NONE
00-07-52-18	rivaroxaban 20 mg / 1 tab(s) Oral QPM	20	59	F	65	1.58	26.0375	NO	NKA	NO	NONE	NONE	NONE	NONE	NONE	RIVA	NO	BREAST CA, ATRIAL FLUTTER, CVA 5 YEARS BACK, DLD, POST STROKE SEZIURES	20	17	109	32.29	9.48	64	100.547	NONE	NONE	NONE	NONE	NONE	0	0	0	0	0	1	0	0	0	0	0		NONE	NONE
00-61-96-68	rivaroxaban 20 mg/ 1 tab(s) Oral Daily	20	59	F	89	1.55	37.0447	NO	NKA	NO	NONE	NONE	NONE	NONE	NONE	RIVA	ASA	T2DM, BA, AFIB, HX OF TB TREATED 25 YEARS AGO, HTN, OSTEOPOROSIS	19	17	68	37.86	6.65	55	160.2	NONE	NONE	NONE	NONE	NONE	0	0	0	0	0	1	0	0	0	0	1		NONE	NONE
00-10-73-04	rivaroxaban 20 mg/ 1 tab(s) Oral Daily	20	59	F	88.7	1.552	36.8248	NO	GLUTTENS, PENICILLIN	Yes	2013	PE	NONE	NONE	NONE	RIVA	ASA	T2DM, AFIB, CELIAC DISEASE, DLD, GASTRITIS, DVT PE SINCE 7 AGO	35	28	63	38.44	7.91	62	141.634	NONE	NONE	NONE	NONE	NONE	0	0	0	0	0	1	0	0	0	0	1		NONE	NONE
00-77-16-58	rivaroxaban 20 mg/ 1 tab(s) Oral Daily	20	59	F	90	1.69	31.5115	NO	NKA	NO	NONE	NONE	NONE	NONE	NONE	RIVA	NO	HTN, PE NOT ON RIVA ANY MORE	35	14	99	34	12	85	104.824	NONE	NONE	NONE	NONE	NONE	0	0	0	0	0	1	0	0	0	0	0		NONE	NONE
00-41-41-00	rivaroxaban 20 mg/ 1 tab(s) Oral Daily	20	59	M	71.2	1.73	23.7896	YES	NKA	NO	NONE	NONE	NONE	NONE	NONE	RIVA	NO	HTN, PSH SPINAL SURGERY DISKECTOMY (3 SURGERIES 7 YEARS BACK)	35	14	99	34	12	85	82.9271	NONE	NONE	NONE	NONE	NONE	0	0	0	0	0	1	0	0	0	0	0		NONE	NONE
00-66-94-92	rivaroxaban 20 mg/ 1 tab(s) Oral Daily	20	59	F	69.5	1.572	28.1242	NO	NKA	NO	NONE	NONE	NONE	NONE	NONE	RIVA	NO	BA, LEFT COMMON FEMORAL VEIN VEIN THROMBOSIS DIAGNOSED IN 3-12-2016	20	15	93	44.18	14.49	50	137.61	NONE	NONE	NONE	NONE	NONE	0	0	0	0	0	0	0	0	0	0	0		NONE	NONE
10-03-55-84	10 mg daily	10	60	female	88	1.52	38.0886	NO	NKA	no			no			rivaroxaban	aspirin, 81 mg, Oral, Daily	HTN, DLD, DM. ACS, TKR	35	14	99	34	12	85	101.229	NONE	NONE	NONE	NONE	NONE	0	0	0	0	0	1	1	0	0	0	1		NONE	NONE
10-15-30-58	10 mg oral daily	10	60	female	116	1.6	45.3125	NO	NKA	no			no			rivaroxiban	None	TKR,	17	15	104	31.66	8.19	38	298.48	NONE	NONE	NONE	NONE	NONE	0	0	0	0	0	0	0	0	0	0	0		NONE	NONE
10-13-46-36	10 mg oral daily	10	60	male	89.9	1.81	27.4412	NO	NKA	yes		PE	no			rivaroxiban	None	DM,HF,HTN,RECTAL CANCER,PE	28	19	60	37.81	10.13	148	59.3934	NONE	NONE	NONE	NONE	NONE	0	0	0	0	0	0	0	0	0	0	0		NONE	NONE
10-13-83-51	10 mg oral daily for 24 days	10	60	female	89	1.49	40.0883	NO	NKA	no			no			rivaroxiban	None	TKR,HTN,OA,OBESE	14	15	96	31.47	7.31	46	189.179	NONE	NONE	NONE	NONE	NONE	0	0	0	0	0	1	1	1	0	0	1		NONE	NONE
01-15-40-43	10 mg, Oral, Daily, 3 refills	10	60	female	83.5	1.45	39.7146	NO	NKA	yes		PE	yes		proxysmal A-fib	rivaroxiban	None	HF,OSA,ANEMIA,A-fib,DM,ESRD,HTN,CHF	19	10	193	27.78	6.57	504	16.1993	NONE	NONE	NONE	NONE	NONE	0	0	0	0	0	0	0	0	0	0	0		NONE	NONE
00-09-63-14	rivaroxaban 10 mg Oral Daily	10	60	M	71.2	1.6	27.8125	NO	NKA	Yes	2009	DVT	NONE	NONE	NONE	RIVA	ASA	DVT	27	16	65	38.2	7.45	106	65.6771	NONE	NONE	NONE	NONE	NONE	0	0	0	0	0	0	0	0	0	0	0		NONE	NONE
00-84-26-70	rivaroxaban 10 mg/ 1 tab(s) Oral Daily	10	60	F	83.9	1.5	37.2889	NO	NKA	NO	NONE	NONE	NONE	NONE	NONE	RIVA	NO	DM, DLD, HTN, OA, BILATERAL KNEE O, TKR	18	25	72	30.76	9.32	61	134.485	NONE	NONE	NONE	NONE	NONE	0	0	0	0	0	1	1	0	0	0	1		NONE	NONE
00-30-02-62	rivaroxaban 10 mg/ 1 tab(s) Oral Daily	10	60	M	97	1.74	32.0386	NO	NKA	Yes	18 YEARS BACK	DVT	NONE	NONE	NONE	RIVA	NO	DM, DLD, CHRONIC DVT SINCE 18 YEARS BACK	28	21	92	39.41	6.35	86	110.284	NONE	NONE	NONE	NONE	NONE	0	0	0	0	0	1	0	0	0	0	1		NONE	NONE
00-06-15-05	rivaroxaban 10 mg/ 1 tab(s) Oral Daily	10	60	F	66	1.53	28.1943	NO	NKA	NO	NONE	NONE	NONE	NONE	NONE	RIVA	NO	OA, TKR, DM, HTN,	35	14	99	34	12	85	75.9216	NONE	NONE	NONE	NONE	NONE	0	0	0	0	0	0	0	0	0	0	1		NONE	NONE
00-58-14-89	rivaroxaban 10 mg/ 1 tab(s) Oral Daily	10	60	M	76	1.59	30.0621	NO	NKA	Yes	2018	DVT	NONE	NONE	NONE	RIVA	NO	CKD, HTN, STROKE, DVT 2018	24	15	107	42.76	9.16	216	34.4033	NONE	NONE	NONE	NONE	NONE	0	0	0	0	0	0	0	0	1	0	0		NONE	NONE
00-35-53-63	rivaroxaban 10 mg/ 1 tab(s) Oral Daily	10	60	F	78.7	1.537	33.314	NO	NKA	NO	NONE	NONE	NONE	NONE	NONE	RIVA	NO	TKR, SVD, BA, DLD	21	18	75	32.97	4.69	60	128.252	NONE	NONE	NONE	NONE	NONE	0	0	0	0	0	0	1	0	0	0	0		NONE	NONE
00-03-66-78	rivaroxaban 10 mg/ 1 tab(s) Oral Daily	10	60	F	73	1.53	31.1846	NO	NKA	NO	NONE	NONE	NONE	NONE	NONE	RIVA	NO	RA, OSTEOPOROSIS, TKR, BILATERAL ELBOWS, LEFT SHOULDER REPLACMENT	12	19	72	28.79	6.55	41	174.092	NONE	NONE	NONE	NONE	NONE	0	0	0	0	0	0	0	0	0	0	0		NONE	NONE
02-11-80-77	15 mg daily	15	60	male	81	1.73	27.0641	yes	NKA	no			no			rivaroxaban	aspirin, 81 mg, Oral, Daily, clopedogril 75 mg daily	asthma, DM, CRAO OS, PDR OD, RECENT CARDIAC CATH FOR MI	19	22	108	37.98	9.32	88	90	NONE	NONE	NONE	NONE	NONE	0	0	0	0	0	0	0	0	0	0	1		NONE	NONE
10-06-90-83	15 mg daily	15	60	female	59	1.6	23.0469	NO	NKA	no			yes	43105	Afib	rivaroxaban	None	ASD, PHTN, HTN, Afib, moderately severe MR	16	15	70	37.19	12.62	49	117.732	NONE	NONE	NONE	NONE	NONE	0	0	0	0	0	0	0	0	0	1	0		NONE	NONE
10-23-86-93	15 mg daily	15	60	female	41	1.5	18.2222	NO	NKA	yes	43678	PE	yes			rivaroxaban	None	HTN, post Aortic valve replacement, Afib	19	23	179	27.38	11.36	84	47.7249	NONE	NONE	NONE	NONE	NONE	0	0	0	0	0	1	0	0	0	0	0		NONE	NONE
10-10-27-48	15 mg daily	15	60	female	79	1.5	35.1111	NO	NKA	no			yes			rivaroxaban	aspirin, 81 mg, Oral, Daily	DM, HTN, AF, RHD	18	20	69	34	10.11	58	133.18	NONE	NONE	NONE	NONE	NONE	0	0	0	0	0	0	0	0	0	0	0		NONE	NONE
10-23-56-09	15 mg daily	15	60	male	71	1.65	26.079	NO	NKA	no			no			rivaroxaban	None	RHD, invasive mitral valve replacement with Mosaic mitral valve, hemorrhoids	53	21	49	27.44	5.52	59	117.665	NONE	NONE	NONE	NONE	NONE	0	0	0	0	0	0	0	0	0	0	0		NONE	NONE
01-17-94-61	15 mg oral qpm	15	60	male	80	1.6	31.25	NO	NKA	no			no			rivatoxaban	None		35	14	99	34	12	85	92.0261	NONE	NONE	NONE	NONE	NONE	0	0	0	0	0	0	0	0	0	0	0		NONE	NONE
10-16-23-17	20 mg oral for 21 days then 15 mg oral daily	15	60	female	60	1.39	31.0543	NO	NKA	no			no			rivaroxiban	None	Mitral stenosis,anemia,gerdRheumatic heart disease,	20	15	112	38.77	3.66	68	86.2745	NONE	NONE	NONE	NONE	NONE	0	0	0	0	0	0	0	0	0	0	0		NONE	NONE
00-72-72-57	rivaroxaban 15 mg / 1 tab(s) Oral Daily	15	60	M	100	1.68	35.4308	NO	NKA	NO	NONE	NONE	NONE	NONE	NONE	RIVA	CLOPI	DM, DLD, STROKE, HTN, CAD,AFIB, IHD	29	18	74	35	7.96	82	119.241	NONE	NONE	NONE	NONE	NONE	0	0	0	0	0	1	1	0	0	0	1		NONE	NONE
00-23-86-99	rivaroxaban 15 mg / 1 tab(s) Oral Daily	15	60	F	67	1.56	27.5312	NO	NKA	NO	NONE	NONE	NONE	NONE	NONE	RIVA	NO	DM, HTN, AFIB,	24	17	64	38.4	18.39	62	105.663	NONE	NONE	NONE	NONE	NONE	0	0	0	0	0	1	0	0	0	0	1		NONE	NONE
00-74-88-06	rivaroxaban 15 mg / 1 tab(s) Oral Daily	15	60	M	142	1.73	47.4456	NO	NKA	NO	NONE	NONE	NONE	NONE	NONE	RIVA	NO	BA, HTN, DM, OBESITY, PAROX. AFIB, SEVERE NON ISCHEMIC CARDIOMYOPATHY	35	14	99	34	12	85	163.346	NONE	NONE	NONE	NONE	NONE	0	0	0	0	0	1	0	0	0	0	1		NONE	NONE
00-47-02-78	rivaroxaban 15 mg / 1 tab(s) Oral Daily	15	60	M	74	1.68	26.2188	YES	NKA	NO	NONE	NONE	NONE	NONE	NONE	RIVA	NO	T2DM, IHD, ICMP, COPD, PAROXYSMAL AFIB,	31	20	178	32.51	11.73	69	104.863	NONE	NONE	NONE	NONE	NONE	0	0	0	0	0	0	0	0	0	0	1		NONE	NONE
00-22-10-03	rivaroxaban 15 mg / 1 tab(s) Oral Daily	15	60	F	76	1.54	32.0459	NO	NKA	NO	NONE	NONE	NONE	NONE	NONE	RIVA	NO	MS, POSR STROKE DEMENTIA, AFIB, HYPOTHYROIDISM , HTN,, BED RIDDEN	29	26	71	29.98	6.07	46	161.546	NONE	NONE	NONE	NONE	NONE	0	0	0	0	0	0	0	1	0	0	0		NONE	NONE
00-14-29-17	rivaroxaban 15 mg / 1 tab(s) Oral Daily	15	60	F	75	1.54	31.6242	NO	NKA	NO	NONE	NONE	NONE	NONE	NONE	RIVA	ASA	AFIB, DLD, HTN, BA, DEPRESSION,	19	16	78	42.6	6.43	71	103.286	NONE	NONE	NONE	NONE	NONE	0	0	0	0	0	1	1	0	0	0	0		NONE	NONE
00-00-96-34	rivaroxaban 15 mg / 1 tab(s) Oral Daily	15	60	F	55.4	1.54	23.3598	NO	NKA	NO	NONE	NONE	NONE	NONE	NONE	RIVA	NO	USUAL INTERSTITIAL PNEUMONIA, PULMONARY HTN, OLD PULMONARY TUBERCULOSIS, GERD, FIBROMYALGIA, HYPOTHYROIDISM, OSTEOPENIA,	34	24	134	36.43	3.19	36	150.469	NONE	NONE	NONE	NONE	NONE	0	0	0	0	0	1	1	0	0	0	0		NONE	NONE
00-79-16-60	rivaroxaban 15 mg/ 1 tab(s) Oral Daily	15	60	M	80.6	1.6	31.4844	YES	NKA	NO	NONE	NONE	NONE	NONE	NONE	RIVA	ASA	DM, HTN, AFIB, ICMP, ALCOHOLIC AND TAKES 5MG DIAZEPAM REGULARLY	35	14	99	34	12	85	92.7163	NONE	NONE	NONE	NONE	NONE	0	0	0	0	0	1	0	0	0	0	1		NONE	NONE
10-03-90-56	20 mg daily	20	60	female	72	1.68	25.5102	NO	NKA	yes		Unprovoked Splenic vein thrombosis	no			rivaroxaban	None	DLD, DM, Unprovoked Splenic vein thrombosis, Ischemic colitis	35	14	99	34	12	85	82.8235	NONE	NONE	NONE	NONE	NONE	0	0	0	0	0	1	0	0	0	1	1		NONE	NONE
01-20-54-84	20 mg daily	20	60	male	79	1.7	27.3356	NO	NKA	yes	2008	LL arterial thrombosis	no			rivaroxaban	None	DLP, HTN, DM, LVSD, LL arterial thrombosis	24	29	49	33.61	18.35	100	77.2444	NONE	NONE	NONE	NONE	NONE	0	0	0	0	0	1	0	0	0	1	1		NONE	NONE
10-21-13-04	20 mg daily	20	60	female	80	1.53	34.1749	NO	NKA	yes		DVT	no			rivaroxaban	None	Diabetes, Hypertension, Hyperlipidemia, Hypothyroidism, Ovarian Mucinous Adenocarcinoma	35	14	99	34	12	85	92.0261	NONE	NONE	NONE	NONE	NONE	0	0	0	0	0	1	0	1	0	0	1		NONE	NONE
02-03-93-80	20 mg daily	20	60	male	84	1.7	29.0657	NO	NKA	no			yes	17/12/2017	PAF	rivaroxaban	aspirin, 81 mg, Oral, Daily	DM, HTN, Afib, DLD, Glaucoma	25	20	51	28.5	7.46	59	139.209	NONE	NONE	NONE	NONE	NONE	0	0	0	0	0	1	1	0	0	0	1		NONE	NONE
01-13-16-38	20 mg daily	20	60	female	61	1.53	26.0584	no	NKA	no			yes			rivaroxaban	None	polio , HTN ,DM , on pace maker	48	26	62	40	5.32	34	175.425	NONE	NONE	NONE	NONE	NONE	0	0	0	0	0	1	0	0	0	0	1		NONE	NONE
10-10-68-81	20 mg daily	20	60	male	60.8	1.68	21.542	NO	NKA	no			yes			rivaroxaban	None	DM, Pulmonary TB, Relapse Diffuse large B-Cell Lymphoma,	110	263	116	25.84	70.5	88	67.5556	NONE	NONE	NONE	NONE	NONE	0	0	0	0	0	1	0	0	0	0	1		NONE	NONE
10-17-71-09	20 mg daily	20	60	male	45	1.6	17.5781	NO	NKA	no			yes			rivaroxaban	None	Afib, CVA, DM, DLD, Cardiomyopathy	49	70	545	15.41	149.04	98	44.898	NONE	NONE	NONE	NONE	NONE	0	0	0	0	0	1	0	0	0	0	1		NONE	NONE
00-98-80-41	20 mg daily	20	60	female	68.9	1.64	25.6172	NO	NKA	no			no			rivaroxaban	None	ASD, HTN, Pulmonary hypertension, hypothyrodism	16	13	124	35.16	12.95	93	72.4397	NONE	NONE	NONE	NONE	NONE	0	0	0	0	0	0	0	0	0	0	1		NONE	NONE
10-18-61-20	20 mg daily	20	60	male	60.4	1.54	25.468	yes	NKA	no			yes		PAF	rivaroxaban	None	DM, PAF, left big toe amputation	57	33	106	26.96	8.47	72	82.0247	NONE	NONE	NONE	NONE	NONE	0	0	0	0	0	0	0	0	0	0	1		NONE	NONE
01-11-23-33	20 mg daily	20	60	female	65	1.54	27.4077	NO	NKA	yes		Portal vein thrombosis	yes			rivaroxaban	None	Afib, Portal vein thrombosis	20	25	96	36.89	13.7	47	135.225	NONE	NONE	2	NONE	NONE	0	0	0	0	0	0	0	0	0	0	0		NONE	NONE
01-20-71-22	20 mg daily	20	60	male	70.8	1.72	23.9319	NO	NKA	no			no			rivaroxaban	aspirin, 81 mg, Oral, Daily		35	14	99	34	12	85	81.4431	NONE	NONE	NONE	NONE	NONE	0	0	0	0	0	0	0	0	0	0	0		NONE	NONE
10-21-05-58	20 mg daily	20	60	male	90	1.82	27.1706	NO	NKA	yes		IVC THROMBOSIS	no			rivaroxaban	None	RENAL CELL CARCINOMA, OPERATED NEPHRECTOMY, CLEAR CELL SUBTYPE, anxiety, VTE	20	26	74	35.5	8.11	190	46.3158	NONE	NONE	NONE	NONE	NONE	0	0	0	0	0	0	0	0	0	0	0		NONE	NONE
10-10-80-17	20 mg daily	20	60	female	106	1.6	41.4062	NO	NKA	no			yes			rivaroxaban	None	DM, Afib, HTN	17	9	57	39.44	4.06	74	140.06	NONE	NONE	NONE	NONE	NONE	0	0	0	0	0	0	0	0	0	0	0		NONE	NONE
01-09-65-80	20 mg daily	20	60	male	119	1.72	40.2244	NO	NKA	no			yes		PAF	rivaroxaban	None	IHD, DM, HTN, Afib	30	19	75	34.16	8.39	79	147.286	NONE	NONE	NONE	NONE	NONE	0	0	0	0	0	0	0	0	0	0	0		NONE	NONE
10-05-89-31	20 mg daily	20	60	male	69.4	1.52	30.0381	NO	NKA	no			yes			rivaroxaban	None	AF, Ischemic cardiomyopathy, LVSD. EF ~ 20%	22	16	120	35.06	12.89	129	52.6029	NONE	NONE	NONE	NONE	NONE	0	0	0	0	0	0	0	0	0	0	0		NONE	NONE
01-09-89-86	20 mg daily	20	60	male	59.6	1.64	22.1594	yes	NKA	no			yes			rivaroxaban	None	HTN, DM, CABG, Afib with EF of 25 %	17	21	171	39.22	21.72	93	62.6619	NONE	NONE	NONE	NONE	NONE	0	0	0	0	0	0	0	0	0	0	0		NONE	NONE
10-16-14-86	20 mg oral daily	20	60	female	54	1.56	22.1893	NO	NKA	no			yes		a-fib	rivaroxiban	None	DM,COLON CANCER,AF	15	34	93	32	25.32	60	88	NONE	NONE	NONE	NONE	NONE	0	0	0	0	0	0	0	0	0	0	1		NONE	NONE
10-14-74-31	20 mg oral daily	20	60	female	80	1.6	31.25	NO	NKA	no			yes		a-fib	rivaroxiban	None	AF	35	14	99	34	12	85	92.0261	NONE	NONE	NONE	NONE	NONE	0	0	0	0	0	0	0	0	0	0	0		NONE	NONE
01-17-78-23	20 mg oral qpm	20	60	female	81.5	1.56	33.4895	NO	NKA	no			yes		artial flutter	rivaroxiban	None	OCD,HTN,DEPRESSION	25	23	68	37.11	7.33	86	92.6615	NONE	NONE	NONE	NONE	NONE	0	0	0	0	0	1	1	0	0	0	0		NONE	NONE
00-85-99-00	20 mg oral qPM	20	60	female	69.5	1.53	29.6894	NO	NKA	no			yes	43191	Parox A.Afib	rivaroxaban	aspirin 81 mg	DLD, HTN, NIDDM	51	0	0	40.1	3.68	61	111.403	NONE	0.32	NONE	NONE	NONE	0	0	0	0	0	0	0	0	0	0	0		NONE	NONE
00-89-33-15	20 mg oral tablet	20	60	female	57.5	1.54	24.2452	NO	NKA	no			yes			rivaroxaban	None	HTN, DM ,Afib, CVA, Fall, LEFT SIDED WEAKNESS WITH DIZZINESS	33	14	77	30.96	5.99	91	61.7827	NONE	NONE	NONE	NONE	NONE	0	0	0	0	0	1	0	0	0	0	1		NONE	NONE
10-13-83-59	20 mg oral tablet, 1 tab(s), Oral, qPM	20	60	male	73	1.65	26.8136	NO	NKA	yes		PE	no			rivaroxiban	None	DM,PE,	50	35	124	38.68	11.42	86	82.9974	NONE	NONE	NONE	NONE	NONE	0	0	0	0	0	1	0	0	0	0	1		NONE	NONE
10-11-32-67	20 mg oral tablet, 1 tab(s), Oral, qPM	20	60	male	86	1.63	32.3685	yes	NKA	yes		LV thrombus	yes		A-fib	rivaroxiban	aspirin 81 mg	HTN,CHF,MI	21	16	54	36.61	11.32	154	54.6032	NONE	NONE	NONE	NONE	NONE	0	0	0	0	0	1	0	0	0	0	0		NONE	NONE
10-13-57-59	20 mg oral tablet, 1 tab(s), Oral, qPM	20	60	male	100	1.5	44.4444	NO	NKA	no			yes		a-fib	rivaroxiban	aspirin 81 mg	HTN,DM,CVA,LVSD,AFIB,GALL STONE	33	17	82	31.65	14.51	142	68.8576	NONE	NONE	NONE	NONE	NONE	0	0	0	0	0	0	0	0	0	0	0		NONE	NONE
10-13-00-19	20 mg oral tablet, 1 tab(s), Oral, qPM	20	60	male	92	1.71	31.4627	NO	NKA	no			yes		a-fib	rivaroxiban	None	HTN,PALPITATION,	22	13	65	36.82	7.89	83	108.38	NONE	NONE	NONE	NONE	NONE	0	0	0	0	0	0	0	0	0	0	0		NONE	NONE
10-11-81-31	20 mg oral tablet, 1 tab(s), Oral, qPM	20	60	male	85.5	1.96	22.2564	quit 7 years ago	NKA	no			yes		a-fib	rivaroxiban	None	HTN,T2DM,IHD,A-FIB	15	9	108	32.35	28.1	85	98.3529	NONE	NONE	NONE	NONE	NONE	0	0	0	0	0	0	0	0	0	0	0		NONE	NONE
00-91-56-51	20 mg oral tablet, 20 mg, Oral, Daily	20	60	female	92.5	1.52	40.0364	NO	NKA	yes		recurrent DVT	no			rivaroxaban	None	DM, bleeding	14	0	0	30.5	5.48	137	66.0178	NONE	NONE	NONE	NONE	NONE	0	0	0	0	0	0	0	0	0	0	1		NONE	NONE
01-14-83-06	20 mg oral tablet.	20	60	female	92.8	1.575	37.4099	NO	NKA	NO			YES		A-fib	rivaroxiban	None	DM , A-fib	27	16	73	36.79	6.29	65	139.597	NONE	NONE	NONE	NONE	NONE	0	0	0	0	0	1	0	0	0	0	1		NONE	NONE
00-91-64-88	20 mg, Oral, Daily	20	60	male	93	1.72	31.4359	NO	NKA	no			no			rivaroxaban	None	DM, HTN, History of heart valve repair, History of mitral valve replacement	19	19	148	37.1	15.26	139	65.4197	NONE	NONE	NONE	NONE	NONE	0	0	0	0	0	1	0	0	0	0	1		NONE	NONE
10-09-94-65		20	60	M	68	1.63	25.5937	Yes	NKA	NO	NONE	NONE	None	None	None	Rivaroxaban	None	CPFE,HTN, IHD, VTE, PE, OSTEOPOROSIS	11	18	66	20.89	8.34	87	76.424	None	None	None	None	None	0	0	0	0	0	1	1	1	1	1	1		NONE	NONE
00-00-56-48	rivaroxaban 20 mg / 1 tab(s) Oral QPM	20	60	F	75	1.52	32.4619	NO	NKA	Yes	NOT CLEAR	DVT	NONE	NONE	NONE	Rivaroxaban	NONE	DM, HTN, DLD, RECURRENT DVT, ADENOMA,	19	17	91	36.24	7.5	60	122.222	NONE	NONE	NONE	NONE	NONE	1	0	0	0	0	1	1	0	0	1	1		NONE	NONE
00-64-37-02	rivaroxaban 20 mg/ 1 tab(s) Oral Daily	20	60	M	80	1.6	31.25	NO	NKA	NO	NONE	NONE	NONE	NONE	NONE	RIVA	NO	DM, HTN, DLD, STROKE, ISCHEMIC CARDIOMYOPATHY	21	22	91	27.84	5.06	67	116.75	NONE	NONE	NONE	NONE	NONE	0	0	0	0	0	1	1	0	0	0	1		NONE	NONE
00-17-89-74	rivaroxaban 20 mg/ 1 tab(s) Oral Daily	20	60	M	106.2	1.64	39.4854	NO	NKA	NO	NONE	NONE	NONE	NONE	NONE	RIVA	ASA	T2DM, HTN, AFIB, EXERTION AL SOB CLASS II ,	33	24	252	34.84	14.88	83	125.108	NONE	NONE	NONE	NONE	NONE	0	0	0	0	0	1	0	0	0	0	1		NONE	NONE
00-49-07-91	rivaroxaban 20 mg/ 1 tab(s) Oral Daily	20	60	M	75	1.75	24.4898	NO	NKA	NO	NONE	NONE	NONE	NONE	NONE	RIVA	ASA	HTN, DM, RECURRENT STROKE, AFIB	35	14	99	34	12	85	86.2745	NONE	NONE	NONE	NONE	NONE	0	0	0	0	0	1	0	0	0	0	1		NONE	NONE
00-64-50-37	rivaroxaban 20 mg/ 1 tab(s) Oral Daily	20	60	M	83.5	1.59	33.0288	YES	NKA	NO	NONE	NONE	NONE	NONE	NONE	RIVA	ASA	DM, HTN, ANEURYSM,	30	17	104	41.37	6.85	93	87.7897	NONE	NONE	NONE	NONE	NONE	0	0	0	0	0	1	0	0	0	0	1		NONE	NONE
00-74-89-71	rivaroxaban 20 mg/ 1 tab(s) Oral Daily	20	60	M	96	1.72	32.45	NO	NKA	NO	NONE	NONE	NONE	NONE	NONE	RIVA	ASA	DM, PAROX. AFIB	41	17	79	38.91	9.99	72	130.37	NONE	NONE	NONE	NONE	NONE	0	0	0	0	0	0	0	0	0	0	1		NONE	NONE
00-51-28-50	rivaroxaban 20 mg/ 1 tab(s) Oral Daily	20	60	M	65	1.65	23.8751	NO	NKA	NO	NONE	NONE	NONE	NONE	NONE	RIVA	NO	LLDVT, DM, ADENOCARCINOMA	35	14	99	34	12	85	74.7712	NONE	NONE	NONE	NONE	NONE	0	0	0	0	0	0	0	0	0	0	1		NONE	NONE
00-07-01-15	rivaroxaban 20 mg/ 1 tab(s) Oral Daily	20	60	F	80	1.63	30.1103	NO	NKA	Yes	?	PE	NONE	NONE	NONE	RIVA	NO	T2DM, PROVOKED SUB MASSIVE PE	23	19	64	37.83	16.92	82	95.393	NONE	NONE	NONE	NONE	NONE	0	0	0	0	0	0	0	0	1	1	0		NONE	NONE
00-79-75-79	rivaroxaban 20 mg/ 1 tab(s) Oral Daily	20	60	F	57	1.45	27.1106	NO	NKA	NO	NONE	NONE	NONE	NONE	NONE	RIVA	NO	HYPOTHYROID, SLE, SEVERE PHT, PT PELVIC REPLACEMENT	23	18	91	35.87	5.15	46	121.159	NONE	NONE	NONE	NONE	NONE	0	0	0	0	0	0	0	1	0	0	0		NONE	NONE
00-25-41-20	rivaroxaban 20 mg/ 1 tab(s) Oral Daily	20	60	F	82.5	1.54	34.7866	NO	NKA	NO	NONE	NONE	NONE	NONE	NONE	RIVA	NO	PAFIB, ASTHMA, HTN	19	17	86	35.46	5.64	59	136.723	NONE	NONE	NONE	NONE	NONE	0	0	0	0	0	1	0	0	0	0	0		NONE	NONE
00-40-15-81	rivaroxaban 20 mg/ 1 tab(s) Oral Daily	20	60	F	77.9	1.496	34.8076	NO	NKA	NO	NONE	NONE	NONE	NONE	NONE	RIVA	NO	AFIB, TIA STROKE 2 YEARS BACK, HTN, OAB/DO , GI STOMAL TUMOR	22	17	83	33.44	13.12	74	102.931	NONE	NONE	NONE	NONE	NONE	0	0	0	0	0	1	0	0	0	0	0		NONE	NONE
00-24-45-96	rivaroxaban 20 mg/ 1 tab(s) Oral Daily	20	60	F	84	1.49	37.8361	NO	NKA	NO	NONE	NONE	NONE	NONE	NONE	RIVA	ASA	RHD S/P MV REPLACEMENT (TISSUE) + MAZE PROCEDURE FOR AFIB 2015	31	26	194	35.42	9.81	69	119.034	NONE	NONE	NONE	NONE	NONE	0	0	0	0	0	0	0	0	0	0	0		NONE	NONE
10-18-44-35	10 mg daily	10	61	female	62.6	1.553	25.9556	NO	NKA	no			no			rivaroxaban	None	TKR, HTN, DM, DLD	17	16	82	32.7	3.7	81	74.6219	NONE	NONE	NONE	NONE	NONE	0	0	0	0	0	1	1	0	0	0	1		NONE	NONE
00-96-02-71	10 mg daily	10	61	female	83	1.51	36.4019	NO	NKA	no			no			rivaroxaban	None	HTN, OA, knee pain ( TKR)	23	17	98	36.52	10.81	54	148.409	NONE	NONE	NONE	NONE	NONE	0	0	0	0	0	1	0	0	0	0	1		NONE	NONE
10-05-47-05	10 mg daily	10	61	female	69	1.58	27.6398	NO	NKA	no			no			rivaroxaban	None	TKR	19	9	89	34.71	10	52	128.122	NONE	NONE	NONE	NONE	NONE	0	0	0	0	0	0	0	0	0	0	1		NONE	NONE
10-20-96-27	10 mg daily	10	61	female	85	1.49	38.2866	NO	egg-containing compound, fish	no			no			rivaroxaban	None	hypothyrodism, knee OA, Rheumatoid arthritis	24	17	90	33.13	7.24	53	154.853	NONE	NONE	NONE	NONE	NONE	0	0	0	0	0	0	0	1	0	0	0		NONE	NONE
01-09-32-40	10 mg daily	10	61	female	72.9	1.58	29.2021	NO	NKA	yes		DVT due to immoblization	no			rivaroxaban	ASA, 81 mg, Oral, Daily	DLD, DM, IDA, DVT due to immoblization	30	18	90	34.14	5.1	56	125.695	NONE	0.49	NONE	NONE	NONE	0	0	0	0	0	1	0	0	0	0	0		NONE	NONE
00-97-99-60	10 mg daily	10	61	female	76	1.49	34.2327	NO	NKA	no			no			rivaroxaban	None	DLP, BILATERAL TKR	21	33	215	25.63	17.49	67	109.526	NONE	NONE	NONE	NONE	NONE	0	0	0	0	0	1	0	0	0	0	0		NONE	NONE
10-19-18-31	10 mg daily	10	61	female	88	1.6	34.375	NO	NKA	no			no			rivaroxaban	None	TKR, LEFT ACUTE LOWER LIMB ISCHEMIA	31	23	114	33.43	6.55	43	197.602	NONE	NONE	NONE	NONE	NONE	0	0	0	0	0	0	0	0	0	0	0		NONE	NONE
10-04-73-51	10 mg daily	10	61	female	77.6	1.61	29.9371	NO	NKA	yes	2017	Portal vein thrombosis & cerebral venous sinus thrombosis	no			rivaroxaban	None	PVT, primary myelofibrosis, DM, mitral stenosis	21	20	155	41.63	18.33	68	110.187	NONE	NONE	NONE	NONE	NONE	0	0	0	0	0	0	0	0	0	0	0		NONE	NONE
01-01-98-01	10 mg daily for 90 days	10	61	female	96.9	1.68	34.3325	NO	NKA	no			no			rivaroxaban	None	DM, HTN, DLP, left total knee replacement	22	14	129	35.86	2.92	76	123.108	NONE	NONE	NONE	NONE	NONE	0	0	0	0	0	1	0	1	0	0	1		NONE	NONE
10-16-29-34	10 mg oral daily	10	61	female	67	1.56	27.5312	NO	NKA	no			no			rivaroxiban	None	TKR,HTN,DLD	17	19	84	32.08	2.64	62	104.342	NONE	NONE	NONE	NONE	NONE	0	0	0	0	0	1	1	0	0	0	0		NONE	NONE
10-14-65-02	10 mg oral daily for 25 days	10	61	female	87.7	1.58	35.1306	NO	NKA	no			no			rivaroxiban	None	DM,HTN,DLD,HYPOTHYRODSIM	19	14	84	34.2	3.06	86	98.4642	NONE	NONE	NONE	NONE	NONE	0	0	0	0	0	1	0	1	0	0	1		NONE	NONE
00-09-72-83	rivaroxaban 10 mg Oral Daily	10	61	F	90	1.56	36.9822	NO	NKA	NO	NONE	NONE	NONE	NONE	NONE	RIVA	NO	ALLERGY, URTICARIA, JOINT PAIN, VIT, D DEFFICIENCY, OA , DLD	22	15	74	38.56	5.74	50	173.8	NONE	NONE	NONE	NONE	NONE	0	0	0	0	0	1	0	0	0	0	0		NONE	NONE
00-81-43-97	rivaroxaban 10 mg/ 1 tab(s) Oral Daily	10	61	M	70	1.7	24.2215	YES	NKA	NO	NONE	NONE	NONE	NONE	NONE	RIVA	None	DM, HTN, POST LEFT BKA AMPUTATION IN JULY 2019, HFREF 25%	34	36	401	24.64	5.7	134	50.4395	NONE	NONE	NONE	NONE	NONE	0	0	0	0	0	1	1	0	1	0	1		NONE	NONE
00-53-03-23	rivaroxaban 10 mg/ 1 tab(s) Oral Daily	10	61	M	88.1	1.71	30.1289	NO	NKA	NO	NONE	NONE	NONE	NONE	NONE	RIVA	NO	TKR, HYPOTHY,T2DM	65	46	103	39.2	10.04	95	89.5426	NONE	NONE	NONE	NONE	NONE	0	0	0	0	0	1	1	0	0	0	1		NONE	NONE
00-19-79-01	rivaroxaban 10 mg/ 1 tab(s) Oral Daily	10	61	M	112	1.77	35.7496	NO	COFFEE, PEPPER	Yes	?	DVT	NONE	NONE	NONE	RIVA	NO	HTN, DLD, PORTAL VEIN THROMBOSIS AND SUPERIOR MESENTERIC VEIN THROMBOSIS	33	18	62	39.81	10.18	73	148.14	NONE	NONE	NONE	NONE	NONE	0	0	0	0	0	1	1	0	0	0	0		NONE	NONE
00-07-80-56	rivaroxaban 10 mg/ 1 tab(s) Oral Daily	10	61	F	72.6	1.52	31.4231	NO	NKA	NO	NONE	NONE	NONE	NONE	NONE	RIVA	NO	TKR	35	14	99	34	12	85	82.4698	NONE	NONE	NONE	NONE	NONE	0	0	0	0	0	0	0	0	0	0	0		NONE	NONE
00-05-17-27	rivaroxaban 10 mg/ 1 tab(s) Oral Daily	10	61	M	89	1.77	28.4082	NO	BANANA, CEFTRIAXONE, DICLOFENAC, EGG CONTAINING COMPOUND,	NO	NONE	NONE	NONE	NONE	NONE	RIVA	NO	PRV(JAK 2 NEGATIVE), SAGITAL VENOUS THROMBOSIS 2012 ON LIFE LONG ANTICOAGULANT, PREVIOUSLY WAS ON WARFARIN BUT SHIFTED TO RIVA 15MG	62	27	74	38.39	12.81	87	98.7752	NONE	NONE	NONE	NONE	NONE	0	0	0	0	0	0	0	0	0	0	0		NONE	NONE
00-19-36-08	rivaroxaban 10 mg/ 1 tab(s) Oral Daily	10	61	F	114	1.55	47.4506	NO	NKA	Yes	2010	DVT, PE	NONE	NONE	NONE	RIVA	NO	DVT, PE	15	13	93	35.69	6.31	115	95.7159	NONE	NONE	NONE	NONE	NONE	0	0	0	0	0	0	0	0	0	0	0		NONE	NONE
10-20-81-97	15 mg daily	15	61	male	66	1.59	26.1066	NO	NKA	no			yes			rivaroxaban	None	Post CABG, DM, HTN, Afib, AKI ON TOP OF CKD	25	15	83	37.66	13.69	250	25.4907	NONE	NONE	NONE	NONE	NONE	0	0	0	0	0	1	1	1	0	0	1		NONE	NONE
10-23-65-97	15 mg daily	15	61	female	89	1.69	31.1614	NO	NKA	no			yes		post cardiac surgery A.fibrillation	rivaroxaban	aspirin 81 mg	HFrEF, mitral valve replacement due to sever mitral regurgitation, Afib	16	15	130	37.1	12.11	83	103.535	NONE	NONE	NONE	NONE	NONE	0	0	0	0	0	0	0	0	0	1	0		NONE	NONE
10-11-08-46	15 mg daily	15	61	male	69	1.7	23.8754	no	NKA	no			no			rivaroxaban	aspirin, 81 mg, Oral, Daily	HTN, DM, IHD	16	16	92	32.79	6.79	84	79.3135	NONE	NONE	NONE	NONE	NONE	0	0	0	0	0	0	0	0	0	0	0		NONE	NONE
02-22-71-04	15 mg daily	15	61	male	72	1.68	25.5102	NO	NKA	yes	43315	Cerebral venous thrombosis	no			rivaroxaban	aspirin, 81 mg, Oral, Daily		15	15	64	33.16	7.51	81	85.8272	NONE	NONE	NONE	NONE	NONE	0	0	0	0	0	0	0	0	0	0	0		NONE	NONE
01-20-78-66	15 mg daily	15	61	female	80	1.6	31.25	NO	NKA	no			None			rivaroxaban	None		24	18	71	37	7.06	83	93.0656	NONE	NONE	NONE	NONE	NONE	0	0	0	0	0	0	0	0	0	0	0		NONE	NONE
00-68-08-71	rivaroxaban 15 mg / 1 tab(s) Oral Daily	15	61	F	66.2	1.51	29.0338	NO	NKA	NO	NONE	NONE	NONE	NONE	NONE	RIVA	NO	T2DM, HTN, DLD, HFPEF, AFIB	19	21	119	40.04	6.49	141	45.3332	NONE	NONE	NONE	NONE	NONE	0	0	0	0	0	1	0	0	0	1	1		NONE	NONE
00-02-04-42	rivaroxaban 15 mg / 1 tab(s) Oral QPM	15	61	M	66	1.7	22.8374	NO	NKA	NO	NONE	NONE	NONE	NONE	NONE	RIV	ASA+CLOPIDOGRIL	PAROXYSMAL AFIB, HFrEF, DM, STROKE WITH NO HISTORY OF WEAKNESS, NSTEMI	19	15	147	39.63	9.08	86	74.1008	NONE	NONE	NONE	NONE	NONE	0	1	0	0	0	1	1	0	0	1	1		NONE	NONE
00-00-77-63	rivaroxaban 15 mg / 1 tab(s) Oral QPM	15	61	F	72.2	1.51	31.6653	NO	NKA	Yes	NOT CLEAR	DVT	NONE	NONE	NONE	PREVIOUSLY ON WARFARIN BUT WITH RECURRENT DVT THENY CHANGE TO Rivaroxaban	NONE	DM, DVT, URGE INCONTINENCE, COLONIC POLYP	20	21	64	34.39	5.65	81	86.0656	NONE	NONE	NONE	NONE	NONE	1	0	0	0	0	1	1	0	0	1	1		NONE	NONE
00-44-73-89	rivaroxaban 15 mg/ 1 tab(s) Oral Daily	15	61	F	66.7	1.59	26.3835	NO	NKA	Yes	RECURRENT	DVT, PE	NONE	NONE	NONE	RIVA	NO	PARKINSONS DISEASE, HTN, RECURRENT DVT, PE ON WARFARIN	35	14	99	34	12	85	75.7677	NONE	NONE	NONE	NONE	NONE	0	0	0	0	0	1	0	0	0	0	0		NONE	NONE
10-17-20-04	20 mg daily	20	61	female	123	1.574	49.6473	NO	NKA	yes		PE	no			rivaroxiban	aspirin 81 mg daily	PE, HTN, DLD, DM	17	13	75	34.7	6.52	47	252.688	NONE	NONE	NONE	NONE	NONE	0	0	0	0	0	1	1	0	0	0	1		NONE	NONE
01-20-35-76	20 mg daily	20	61	female	85	1.44	40.9915	NO	NKA	no			yes			rivaroxaban	None	DM, HTN, DLD, Afib	23	17	82	30.07	6.99	105	78.164	NONE	NONE	NONE	NONE	NONE	0	0	0	0	0	1	1	0	0	0	1		NONE	NONE
02-37-38-12	20 mg daily	20	61	female	84	1.56	34.5168	NO	NKA	no			yes			rivaroxaban	None	Afib, DM, DLD, HTN	39.1	23.3	90	44.4	6.9	80	101.383	NONE	NONE	NONE	NONE	NONE	0	0	0	0	0	1	1	0	0	0	1		NONE	NONE
02-02-50-26	20 mg daily	20	61	male	75	1.64	27.8852	NO	NKA	no			yes			rivaroxaban	None	DM, DLD, HTN, Afib	32	18	78	36.69	7.02	92	78.7138	NONE	NONE	NONE	NONE	NONE	0	0	0	0	0	1	1	0	0	0	1		NONE	NONE
10-10-59-05	20 mg daily	20	61	male	104	1.7	35.9862	NO	NKA	no			no			rivaroxaban	None	DM, Hypertension, cardiac cath, pain in the right foot, tenderness, stiffness, and discharge	35	14	99	34	12	198	50.716	NONE	NONE	NONE	NONE	NONE	0	0	0	0	0	1	0	0	0	0	1		NONE	NONE
10-18-98-71	20 mg daily	20	61	male	102	1.7	35.2941	NO	NKA	no			yes			rivaroxaban	None	DM, HTN, AF, S/P PCI to LAD	44	60	104	20.24	14.87	76	129.588	NONE	2.26	NONE	NONE	NONE	0	0	0	0	0	1	0	0	0	0	1		NONE	NONE
02-54-40-16	20 mg daily	20	61	male	81	1.7	28.0277	NO	NKA	no			yes			rivaroxaban	aspirin, 81 mg, Oral, Daily	HTN, DM, Afib, burn two months back following with orthopedics	35	14	99	34	12	85	92.0118	NONE	NONE	NONE	NONE	NONE	0	0	0	0	0	1	1	0	0	0	0		NONE	NONE
10-02-16-25	20 mg daily	20	61	female	78	1.56	32.0513	NO	NKA	no			no			rivaroxaban	None	asthma, HTN, post surgical resection of uterine , IBS	19	15	128	35.02	11.38	48	156.903	NONE	NONE	NONE	NONE	NONE	0	0	0	0	0	1	0	0	0	0	0		NONE	NONE
01-06-18-50	20 mg daily	20	61	female	85	1.6	33.2031	NO	NKA	no			yes			rivaroxaban	None	DM, Afib	17	8	102	33.28	8.42	60	136.787	NONE	NONE	NONE	NONE	NONE	0	0	0	0	0	0	0	0	0	0	0		NONE	NONE
00-93-44-29	20 mg, Oral, Daily,	20	61	famale	89	1.59	35.2043	NO	NKA	yes		DVT	no			Rivaroxaban	None	DVT, Blurring of visual image	28	15	79	40.05	8.48	52	165.259	NONE	NONE	NONE	NONE	NONE	0	0	0	0	0	0	0	0	0	0	0		NONE	NONE
00-04-85-43	rivaroxaban 20 mg / 1 tab(s) Oral QPM	20	61	F	50	1.53	21.3593	NO	NKA	NO	NONE	NONE	NONE	NONE	NONE	RIVA	NO	T2DM, HTN, OSTEOPOROSIS, ATRIAL FLUTTER (MITRAL ANNULUS RELATED), OSTEOPOROSIS,	32	13	39	34.78	5.81	46	104.952	NONE	NONE	NONE	NONE	NONE	0	0	0	0	0	0	0	0	0	0	1		NONE	NONE
00-05-63-54	rivaroxaban 20 mg/ 1 tab(s) Oral Daily	20	61	F	89	1.6	34.7656	NO	NKA	NO	NONE	NONE	NONE	NONE	NONE	RIVA	NO	AFIB, CVA, DM, HTN, SLE	16	9	79	35.19	5.84	91	94.4335	NONE	NONE	NONE	NONE	NONE	0	1	0	0	0	1	1	0	0	1	1		NONE	NONE
00-45-62-94	rivaroxaban 20 mg/ 1 tab(s) Oral Daily	20	61	F	56	1.566	22.8352	NO	NKA	NO	NONE	NONE	NONE	NONE	NONE	RIVA	NO	IHD, DM, HYPOTHYROIDISM, DLD,	35	14	99	34	12	85	63.6131	NONE	NONE	NONE	NONE	NONE	0	0	0	0	0	1	1	0	0	0	1		NONE	NONE
00-79-88-97	rivaroxaban 20 mg/ 1 tab(s) Oral Daily	20	61	M	53.2	1.62	20.2713	NO	AMPICILLIN	NO	NONE	NONE	NONE	NONE	NONE	RIVA	NO	IHD, PAROXAFIB, DM, HTN, DLD,	35	14	99	34	12	85	60.4324	NONE	NONE	NONE	NONE	NONE	0	0	0	0	0	1	1	0	0	0	1		NONE	NONE
00-31-02-28	rivaroxaban 20 mg/ 1 tab(s) Oral Daily	20	61	M	66	1.7	22.8374	NO	NKA	NO	NONE	NONE	NONE	NONE	NONE	RIVA	NO	NON SCHEMIC DILATED CMP, LV THROMBUS AND RESOLVE WITH ANTICOAGULANT, HTN, DM, NON SUSTAINED VT	75	117	195	15.66	181.31	472	13.5014	NONE	NONE	NONE	NONE	NONE	0	0	0	0	0	1	0	0	0	0	1		NONE	NONE
00-56-51-05	rivaroxaban 20 mg/ 1 tab(s) Oral Daily	20	61	M	70	1.66	25.4028	NO	NKA	NO	NONE	NONE	NONE	NONE	NONE	RIVA	NO	HTN, T2DM, PAROXYSMAL AFIB, NON ISCHEMIC CARDIOMYOPATHY	23	18	55	31.38	14.19	47	143.806	NONE	NONE	NONE	NONE	NONE	0	0	0	0	0	1	0	0	0	0	1		NONE	NONE
00-06-07-31	rivaroxaban 20 mg/ 1 tab(s) Oral Daily	20	61	M	90	1.705	30.9595	NO	NKA	Yes	?	DVT	NONE	NONE	NONE	RIVA	ASA	DM, BPH, DVT	29	21	71	38.12	14.91	99	87.7778	NONE	NONE	NONE	NONE	NONE	0	0	0	0	0	1	1	1	0	1	0		NONE	NONE
00-22-86-36	rivaroxaban 20 mg/ 1 tab(s) Oral Daily	20	61	F	67	1.54	28.251	NO	NKA	NO	NONE	NONE	NONE	NONE	NONE	RIVA	NO	PAROXYSMAL AFIB, MODERATE LV DYSFUNCTION, MV REPAIR, SEVERE MS	18	14	124	40.84	8.95	69	93.7568	NONE	NONE	NONE	NONE	NONE	0	0	0	0	0	1	0	0	1	0	0		NONE	NONE
00-15-61-76	rivaroxaban 20 mg/ 1 tab(s) Oral Daily	20	61	F	84.5	1.53	36.0972	NO	NKA	NO	NONE	NONE	NONE	NONE	NONE	RIVA	ASA	HTN, AFIB, TIAHTN	35	14	99	34	12	85	95.9876	NONE	NONE	NONE	NONE	NONE	0	0	0	0	0	1	0	0	0	0	0		NONE	NONE
10-20-49-03	10 mg daily	10	62	female	76.9	1.47	35.587	NO	NKA	no			no			rivaroxaban	None	knee OA, DLP, HTN, DM	41	39	249	30.21	26.33	48	152.732	NONE	NONE	NONE	NONE	NONE	0	0	0	0	0	1	1	0	0	0	1		NONE	NONE
01-06-10-16	10 mg daily	10	62	male	91.4	1.59	36.1536	NO	NKA	yes		PE	no			rivaroxaban	None	liver cirrhosis, mesentric ischemia, anemia	0	28	99	28	14.65	94	92.6965	NONE	NONE	NONE	NONE	NONE	0	0	0	0	0	1	1	0	0	0	1		NONE	NONE
00-98-51-38	10 mg daily	10	62	female	82	1.4	41.8367	NO	NKA	no			no			rivaroxaban	None	DLP, LEFT KNEE TKR	17	21	105	22.05	4.5	36	217.148	NONE	NONE	NONE	NONE	NONE	0	0	0	0	0	1	0	0	0	0	1		NONE	NONE
10-20-25-90	10 mg daily	10	62	male	83	1.72	28.0557	NO	NKA	no			no			rivaroxaban	None	DM, HTN, bilateral knee pain	28	21	96	36.31	8.32	70	113.038	NONE	NONE	NONE	NONE	NONE	0	0	0	0	0	1	0	0	0	0	1		NONE	NONE
01-02-57-66	10 mg daily	10	62	female	65.5	1.58	26.2378	NO	NKA	yes		Recurrent DVT, all in Right lower limb	no			rivaroxaban	None	DLD, recurrent DVTs	29	17	98	40.9	9.76	60	104.072	NONE	NONE	NONE	NONE	NONE	0	0	0	0	0	0	0	0	0	0	0		NONE	NONE
01-17-83-07	10 mg oral for 25 days	10	62	female	95	1.6	37.1094	NO	NKA	no			no			rivaroxiban	None	TKR,DM,HTN	33	16	171	32.18	8.23	67	135.174	NONE	NONE	NONE	NONE	NONE	0	0	0	0	0	1	0	0	0	0	1		NONE	NONE
10-12-55-95	10 mg oral qpm	10	62	female	92.5	1.635	34.6024	NO	NKA	no			no			rivaroxiban	None	TKR	13	14	56	27.04	7.93	69	127.802	NONE	NONE	NONE	NONE	NONE	0	0	0	0	0	1	0	0	0	0	0		NONE	NONE
00-89-50-24	10 mg, Oral, Daily	10	62	female	77	1.56	31.6404	NO	NKA	yes		Portal vein, SMV, and splenic vein thrombosis	no			rivaroxaban	None	polycythemia vera, JAK2 positive, and DVTs	33	43	89	36.05	40.38	58	126.563	NONE	NONE	NONE	NONE	NONE	0	0	0	0	0	0	0	0	0	0	0		NONE	NONE
00-13-37-45	rivaroxaban 10 mg Oral Daily	10	62	F	63.5	1.5	28.2222	NO	NKA	Yes	2011	PE, DVT	NONE	NONE	NONE	RIVA	NO	DM, HTN, DLD, SEIZURE POST ICH, DVT AND PE ON 2011, FRONTAL ICH SECONDARY TO WARFARIN SHIFTED TO RIVARO	23	13	78	36.17	8.44	42	144.135	NONE	NONE	NONE	NONE	NONE	0	0	0	0	0	0	1	0	0	0	1		NONE	NONE
00-12-08-90	rivaroxaban 10 mg/ 1 tab(s) Oral Daily	10	62	F	87.1	1.55	36.2539	NO	NKA	NO	NONE	NONE	NONE	NONE	NONE	RIVA	ASA	TKR, DM, DLD, HTN, HYPOTHYROIDISM,	20	10	75	37.1	5.49	60	138.392	NONE	NONE	NONE	NONE	NONE	0	0	0	0	0	0	0	1	0	0	1		NONE	NONE
00-33-90-29	rivaroxaban 10 mg/ 1 tab(s) Oral Daily	10	62	M	78	1.68	27.6361	NO	NKA	NO	NONE	NONE	NONE	NONE	NONE	RIVA	ASA	DLD, DM, HTN, TKR	73	57	65	42.57	24.81	99	75.1111	NONE	NONE	NONE	NONE	NONE	0	0	0	0	0	1	1	0	0	0	1		NONE	NONE
00-80-02-32	rivaroxaban 10 mg/ 1 tab(s) Oral Daily	10	62	F	75.45	1.5	33.5333	no	NKA	NO	NONE	NONE	NONE	NONE	NONE	RIVA	NO	BA, DM, DLD, HTN, RA, TKR	13	21	81	23.05	11.92	45	159.842	NONE	NONE	NONE	NONE	NONE	0	0	0	0	0	1	1	0	0	0	1		NONE	NONE
00-15-56-75	rivaroxaban 10 mg/ 1 tab(s) Oral Daily	10	62	F	96	1.53	41.0099	NO	AUGMENTIN	NO	NONE	NONE	NONE	NONE	NONE	RIVA	NO	DM, DLD, HYPERPROLACTINAEMIA, TKR	35	14	99	34	12	85	107.671	NONE	NONE	NONE	NONE	NONE	0	0	0	0	0	1	0	0	0	0	1		NONE	NONE
00-49-21-43	rivaroxaban 10 mg/ 1 tab(s) Oral Daily	10	62	F	52.7	1.49	23.7377	NO	NKA	NO	NONE	NONE	NONE	NONE	NONE	RIVA	ASA	T2DM, BA, AFIB, MS, HEPATITIS B	35	14	99	34	12	85	59.1067	NONE	NONE	NONE	NONE	NONE	0	0	0	0	0	0	0	0	0	0	1		NONE	NONE
00-17-97-74	rivaroxaban 10 mg/ 1 tab(s) Oral Daily	10	62	F	96.2	1.65	35.3352	NO	NKA	NO	NONE	NONE	NONE	NONE	NONE	RIVA	NO	BILATERAL TKR, HTN, ATOPIC DERMATITIS.	35	14	99	34	12	85	107.895	NONE	NONE	NONE	NONE	NONE	0	0	0	0	0	1	0	0	0	0	0		NONE	NONE
00-60-84-84	rivaroxaban 10 mg/ 1 tab(s) Oral Daily	10	62	F	74.5	1.46	34.9503	NO	NKA	NO	NONE	NONE	NONE	NONE	NONE	RIVA	NO	TKR	15	20	121	34.38	6.25	57	124.602	NONE	NONE	NONE	NONE	NONE	0	0	0	0	0	0	0	0	0	0	0		NONE	NONE
00-16-94-05	rivaroxaban 10 mg/ 1 tab(s) Oral Daily	10	62	M	96.3	1.77	30.7383	NO	NKA	NO	NONE	NONE	NONE	NONE	NONE	RIVA	NO	TKR, USED FOR 1 MONTH	28	37	39	28.73	10.82	78	117.7	NONE	NONE	NONE	NONE	NONE	0	0	0	0	0	0	0	0	0	0	0		NONE	NONE
00-43-42-30	rivaroxaban 10 mg/ 1 tab(s) Oral Daily	10	62	M	78.9	1.63	29.6963	NO	NKA	Yes	2017	DVT	NONE	NONE	NONE	RIVA	NO	DVT	35	14	99	34	12	85	88.4918	NONE	NONE	NONE	NONE	NONE	0	0	0	0	0	0	0	0	0	0	0		NONE	NONE
01-04-83-34	15 mg daily	15	62	male	79	1.74	26.0933	NO	NKA	yes	42917	PE	no			rivaroxaban	aspirin, 81 mg, Oral, Daily	DM, Non ischemic DCM s/p ICD, PE	43	29	53	32	13.41	78	96.5556	NONE	NONE	NONE	NONE	NONE	0	0	0	0	0	1	0	1	0	0	1		NONE	NONE
10-08-09-11	15 mg daily	15	62	male	167.3	1.7	57.8893	no	NKA	no			yes			rivaroxaban	aspirin, 81 mg, Oral, Daily	DM, HTN, DCMP, AF, TVD	15	13	82	34.96	17.43	75	212.657	NONE	NONE	NONE	NONE	NONE	0	0	0	0	0	1	0	0	0	0	1		NONE	NONE
00-97-54-39	15 mg daily	15	62	female	87.3	1.6	34.1016	NO	NKA	no			no			rivaroxaban	None	valvular regurgitation, DM, HTN	27	26	120	40.29	8.75	94	88.5383	NONE	NONE	NONE	NONE	NONE	0	0	0	0	0	0	0	1	0	0	0		NONE	NONE
10-09-84-48	15 mg daily	15	62	male	68	1.7	23.5294	NO	NKA	no			no			rivaroxaban	aspirin, 81 mg, Oral, Daily, clopidogrel, 75 mg, Oral, Daily	MI, DM, IHD, had angiogram and PCI to LAD	31	16	111	37.43	5.77	109	59.474	NONE	NONE	NONE	NONE	NONE	0	0	0	0	0	0	1	0	0	0	0		NONE	NONE
01-09-00-21	15 mg daily	15	62	male	78	1.68	27.6361	NO	NKA	no			yes			rivaroxaban	ASA, 81 mg, Oral, Daily	IHD, CKD, HTN, Afib, OLD CVA, ICD	10	6	77	33.67	10.44	390	19.0667	NONE	2.48	NONE	NONE	NONE	0	0	0	0	0	0	0	0	0	0	0		NONE	NONE
00-92-69-33	15 mg, Oral, Daily	15	62	female	81.9	1.536	34.7137	NO	NKA	yes		PE	no			rivaroxaban	None	HTN, SLE, ABS, cardiomyobathy	19	21	100	36	7.72	70	111.54	NONE	NONE	NONE	NONE	NONE	0	0	0	0	0	0	0	0	0	0	0		NONE	NONE
00-31-40-45	rivaroxaban 15 mg / 1 tab(s) Oral Daily	15	62	F	80.05	1.61	30.8823	NO	NKA	NO	NONE	NONE	NONE	NONE	NONE	RIVA	NO	HTN, AFIB, DM, DLD, HYPOTHYROIDISM, BREAST CA,	18	17	111	38.65	9.69	113	67.5348	NONE	NONE	NONE	NONE	NONE	0	0	0	0	0	0	0	1	0	0	1		NONE	NONE
00-60-09-51	rivaroxaban 15 mg / 1 tab(s) Oral Daily	15	62	M	132	1.8	40.7407	NO	NKA	Yes	14 YEARS BACK	DVT	NONE	NONE	NONE	RIVA	NO	DM. HTN, DVT 14 YEARS VBACK ,	25	12	121	37.24	10.29	86	146.326	NONE	NONE	NONE	NONE	NONE	0	0	0	0	0	1	0	0	0	0	1		NONE	NONE
00-00-27-43	rivaroxaban 15 mg / 1 tab(s) Oral QPM	15	62	M	102.1	1.655	37.276	NO	NKA	NO	NONE	NONE	NONE	None	None	Rivaroxaban	ASA	DM, HTN, BPH, SLEEP APNEA	24	12	50	39.86	8.36	100	97.3353	NONE	NONE	NONE	NONE	NONE	0	0	0	0	0	0	0	0	0	0	1		NONE	NONE
00-05-48-92	rivaroxaban 15 mg/ 1 tab(s) Oral Daily	15	62	M	144.7	1.92	39.2524	NO	NKA	NO	NONE	NONE	NONE	NONE	NONE	RIVA	NO	AFIB, DM, HTN, GOUT	20	24	87	36.54	9.37	107	128.923	NONE	NONE	NONE	NONE	NONE	0	0	0	0	0	0	0	0	0	0	1		NONE	NONE
00-05-48-92	rivaroxaban 15 mg/ 1 tab(s) Oral Daily	15	62	M	144.7	1.92	39.2524	NO	NKA	NO	NONE	NONE	NONE	NONE	NONE	RIVA	NO	DM, HTN, AFIB, CURRENTLY ON WARFARIN	20	24	87	36.54	9.37	107	128.923	NONE	NONE	NONE	NONE	NONE	0	0	0	0	0	0	0	0	0	0	1		NONE	NONE
10-24-91-98	20 mg daily	20	62	female	65	1.6	25.3906	NO	NKA	no			no			rivaroxaban	aspirin 81 mg	DLD, HTN, DM, appendectomy, tonsillectomy, disc prolapse surgery, CHF	20	15	93	28.36	5.45	68	91.1275	NONE	NONE	NONE	NONE	NONE	0	0	0	0	0	1	0	0	0	1	1		NONE	NONE
02-54-31-84	20 mg daily	20	62	male	68	1.54	28.6726	NO	NKA	no			yes			rivaroxaban	None	Afib, HTN, DM, Hypogonadism	35	14	99	34	12	85	76.2667	NONE	NONE	NONE	NONE	NONE	0	0	0	0	0	1	0	0	0	0	1		NONE	NONE
10-20-02-39	20 mg daily	20	62	male	63.8	1.69	22.3382	NO	NKA	no			yes			rivaroxaban	None	Afib, stroke, DM, frequent PVCs 30% and Non sustained VT . refractory to medications	25	29	83	35.8	10.65	77	78.9905	NONE	NONE	NONE	NONE	NONE	0	0	0	0	0	0	0	0	0	0	1		NONE	NONE
10-19-82-29	20 mg daily	20	62	female	81.5	1.613	31.3248	NO	contrast	no			no			rivaroxaban	None	DILATED CARDIOMYOPATHY, HF	27	18	49	40.16	7.31	73	106.434	NONE	NONE	NONE	NONE	NONE	0	0	0	0	0	0	0	0	0	1	0		NONE	NONE
00-92-05-49	20 mg daily	20	62	female	91	1.665	32.8256	NO	NKA	no			no			rivaroxaban	None	HTN	26	13	150	33	10.3	57	152.199	NONE	NONE	NONE	NONE	NONE	0	0	0	0	0	1	0	0	0	0	0		NONE	NONE
10-21-10-15	20 mg daily	20	62	male	64	1.57	25.9645	NO	NKA	yes		PTE, PE	no			rivaroxaban	None	HTN, NSTEMI, PTE, PE, prediabetes	18	21	61	32.7	6.99	78	78.2222	NONE	NONE	NONE	NONE	NONE	0	0	0	0	0	1	0	0	0	0	0		NONE	NONE
01-04-05-40	20 mg daily	20	62	female	109	1.57	44.2209	NO	NKA	no			no			rivaroxaban	None	DM, DLD, HTN, obesity, AF, obstructive lung disease	22	15	85	39.71	9.82	79	131.536	NONE	NONE	NONE	NONE	NONE	0	0	0	0	0	0	0	0	0	0	0		NONE	NONE
10-16-91-01	20 mg daily	20	62	male	80	1.6	31.25	NO	NKA	no			no			rivaroxiban	None		35	14	99	34	12	85	89.7255	NONE	NONE	NONE	NONE	NONE	0	0	0	0	0	0	0	0	0	0	0		NONE	NONE
00-90-72-93	20 mg oral daily	20	62	female	71	1.45	33.7693	NO	NKA	no			no			rivaroxaban	None	IHD, MOD-SEVER LVSD, severe LVD , moderate MR	16	12	164	33.72	5.72	95	71.2491	NONE	NONE	NONE	NONE	NONE	0	0	0	0	0	0	0	0	0	0	0		NONE	NONE
10-12-24-26	20 mg oral tablet, 1 tab(s), Oral, qPM	20	62	male	74	1.78	23.3556	yes	NKA	no			yes		a-fib	rivaroxiban	None	afib,	22	13	69	35.7	24.85	86	82.031	NONE	NONE	NONE	NONE	NONE	0	0	0	0	0	1	0	0	0	0	1		NONE	NONE
00-91-32-84	20 mg oral tablet, 1 tab(s), Oral, qPM	20	62	female	87.5	1.588	34.6982	NO	NKA	no			yes	2018		rivaroxaban	aspirin, 81 mg, Oral, Daily	HTN, Afib, dyspnea	35	14	99	34	12	64	130.339	NONE	NONE	NONE	NONE	NONE	0	0	0	0	0	1	0	0	0	0	0		NONE	NONE
10-11-76-88	20 mg orally daily	20	62	female	147	1.6	57.4219	NO	NKA	yes		DVT	NO			rivaroxiban	None	HTN,DM,DVT	43	20	161	27.23	4.3	60	233.567	NONE	NONE	NONE	NONE	NONE	0	0	0	0	0	0	0	0	0	0	1		NONE	NONE
00-08-20-14	rivaroxaban 20 mg/ 1 tab(s) Oral Daily	20	62	F	82	1.6	32.0312	NO	NKA	NO	NONE	NONE	NONE	NONE	NONE	RIVA	NO	CHOLECYSTITIS, HTN, TIA	15	9	60	36.34	6.63	70	111.676	NONE	NONE	NONE	NONE	NONE	0	1	0	0	0	1	1	0	0	1	1		NONE	NONE
00-21-45-13	rivaroxaban 20 mg/ 1 tab(s) Oral Daily	20	62	F	90	1.44	43.4028	NO	Imipenem	NO	NONE	NONE	yes	2/19 - 5-19	Stroke, right sided HF (grade II LV diastolic dysfunction	Rivaroxaban	Aspirin	T2DM, HTN, DLP,CKD, HF, STROKE, UTI, MULTIPLE BED ULCERS & DIABETIC FOOT	38	18	128	19.79	3.23	154	55.7143	None	None	None	None	None	0	0	0	0	0	1	1	0	0	1	1		NONE	NONE
00-78-60-56	rivaroxaban 20 mg/ 1 tab(s) Oral Daily	20	62	F	115.5	1.66	41.9146	NO	NKA	NO	NONE	NONE	NONE	NONE	NONE	RIVA	NO	HTN, DM, AFIB, HFPEF, BA, MORBID OBESITY, DLD, OSA	24	13	63	34.1	6.3	73	150.836	NONE	NONE	NONE	NONE	NONE	0	0	0	0	0	1	0	0	0	1	1		NONE	NONE
00-67-43-59	rivaroxaban 20 mg/ 1 tab(s) Oral Daily	20	62	M	97	1.73	32.41	NO	NKA	NO	NONE	NONE	NONE	NONE	NONE	RIVA	NO	MI. IHD, HTN, DLD, SEVERE LV SYSTOLIC DYSFUNCTION	37	27	117	34.73	11.82	137	67.4988	NONE	NONE	NONE	NONE	NONE	0	0	0	0	0	1	1	0	1	0	1		NONE	NONE
00-49-19-94	rivaroxaban 20 mg/ 1 tab(s) Oral Daily	20	62	M	80	1.7	27.6817	NO	NKA	NO	NONE	NONE	NONE	NONE	NONE	RIVA	ASA	BPH, DM , DLD, HTN, CVA STROKE	38	23	73	27.11	9.31	106	71.9497	NONE	NONE	NONE	NONE	NONE	0	0	0	0	0	1	1	0	0	0	1		NONE	NONE
00-57-34-20	rivaroxaban 20 mg/ 1 tab(s) Oral Daily	20	62	F	66	1.51	28.9461	NO	BANANA, EGG CONTAINING COMPOUND	Yes	?	DVT	NONE	NONE	NONE	RIVA	ASA	DM, DLD, STROKE, DVT IN LEFT THIGH	33	17	64	37.68	4.77	75	83.8933	NONE	NONE	NONE	NONE	NONE	0	0	0	0	0	1	1	0	0	0	1		NONE	NONE
00-19-25-61	rivaroxaban 20 mg/ 1 tab(s) Oral Daily	20	62	M	79	1.63	29.7339	NO	NKA	NO	NONE	NONE	NONE	NONE	NONE	RIVA	ASA/ CLOPIDOGRIL	AFIB, DM, HTN, DLD, LOW NORMAL LV SYSTOLIC FX. RECURRENT RENAL STONE . RIVA WAS STOPPED IN 12-2019FOR 3 MONTHS DUE TO HEATOURIA FROM STONE THEN RESUME AFTER 2 WEEKS WITH 15MG OD	27	22	97	38.02	5.1	114	66.0643	NONE	NONE	NONE	NONE	NONE	0	0	0	0	0	0	1	0	0	0	1		NONE	NONE
00-68-61-33	rivaroxaban 20 mg/ 1 tab(s) Oral Daily	20	62	F	64	1.46	30.0244	NO	CLINDA	NO	NONE	NONE	NONE	NONE	NONE	RIVA	NO	SLE, APS, HX OF DVT, HYPOTHYROIDISM	27	27	111	35.43	6.49	52	117.333	NONE	NONE	NONE	NONE	NONE	0	0	0	0	0	0	0	1	0	0	0		NONE	NONE
00-14-47-96	rivaroxaban 20 mg/ 1 tab(s) Oral Daily	20	62	F	50.3	1.5	22.3556	NO	NKA	NO	NONE	NONE	NONE	NONE	NONE	RIVA	NO	HTN, DLD, GOUT, PAROXYSMAL ATRIAL LUTTER AND PALPITATION.	23	15	77	43.06	11.99	43	111.518	NONE	NONE	NONE	NONE	NONE	0	0	0	0	0	1	1	0	0	0	0		NONE	NONE
00-33-71-99	rivaroxaban 20 mg/ 1 tab(s) Oral Daily	20	62	F	84.6	1.47	39.1504	NO	BANANA, EGG CONTAINING COMPOUND, EGGPLANT	NO	NONE	NONE	NONE	NONE	NONE	RIVA	NO	HTN, DLD, AFIB, HEMORROIDS	16	19	132	33.84	8.94	77	104.743	NONE	NONE	NONE	NONE	NONE	0	0	0	0	0	1	1	0	0	0	0		NONE	NONE
00-08-55-25	rivaroxaban 20 mg/ 1 tab(s) Oral Daily	20	62	F	55	1.63	20.7008	NO	NKA	NO	NONE	NONE	NONE	NONE	NONE	RIVA	NO	BREAST CA, AFIB, HTN, BONE CA, EPIGASTRIC PAIN FOR 3 MONTHS	38	111	361	24.56	85.44	72	72.8241	NONE	NONE	NONE	NONE	NONE	0	0	0	0	0	1	0	0	0	0	0		NONE	NONE
00-80-01-92	rivaroxaban 20 mg/ 1 tab(s) Oral Daily	20	62	F	51.5	1.6	20.1172	NO	D5LR, CRABS, SHRIMP	NO	NONE	NONE	NONE	NONE	NONE	RIVA	NO	HTN, AFIB	35	14	99	34	12	85	57.7608	NONE	NONE	NONE	NONE	NONE	0	0	0	0	0	1	0	0	0	0	0		NONE	NONE
00-81-28-24	rivaroxaban 20 mg/ 1 tab(s) Oral Daily	20	62	M	81.6	1.8	25.1852	NO	NSAID, CEFUROXIME	NO	NONE	NONE	NONE	NONE	NONE	RIVA	NO	IHD, AFIB, HTN,	35	14	99	34	12	85	91.52	NONE	NONE	NONE	NONE	NONE	0	0	0	0	0	1	0	0	0	0	0		NONE	NONE
00-25-94-67	rivaroxaban 15 mg BID FOR 21 DAYS THEN 20MG DAILY	30	62	F	75	1.49	33.7823	NO	DUST	NO	NONE	NONE	NONE	NONE	NONE	RIVA	NO	SLEEVE GASTRECTOMY, CHOLECYSTECTOMY, DM , HTN, DLD	22	10	104	34.7	5.82	61	117.213	NONE	NONE	NONE	NONE	NONE	0	0	0	0	0	0	1	0	0	0	1		NONE	NONE
10-20-29-25	10 mg daily	10	63	female	84.5	1.65	31.0376	NO	NKA	yes	6 years back	DVT	no			rivaroxaban	None	DM, Osteoporosis, DVT	27	17	73	38	3.18	70	113.606	NONE	NONE	NONE	NONE	NONE	0	0	0	0	0	0	0	0	0	0	1		NONE	NONE
01-08-83-58	10 mg daily	10	63	female	88.5	1.65	32.5069	NO	NKA	no			no			rivaroxaban	None	HTN, DM, PAIN AND SWELLING OF THE LOWER PART OF THE RIGHT LEG	20	15	76	40.63	5.88	64	130.138	NONE	NONE	NONE	NONE	NONE	0	0	0	0	0	0	0	0	0	1	0		NONE	NONE
10-19-22-53	10 mg daily	10	63	female	95.3	1.503	42.1866	NO	shrimb	no			no			rivaroxaban	None	HTN, TKR, Arthritis	11	13	82	29.31	11.85	56	160.157	NONE	NONE	NONE	NONE	NONE	0	0	0	0	0	1	0	0	0	0	0		NONE	NONE
01-00-07-78	10 mg daily	10	63	male	65	1.65	23.8751	NO	NKA	no			yes			rivaroxaban	None	HTN, DM, DLP, HF, IHD, AF, CKD	29	41	624	20.41	34.26	181	33.7968	NONE	NONE	NONE	NONE	NONE	0	0	0	0	0	0	0	0	0	0	0		NONE	NONE
10-12-72-13	10 mg oral daily	10	63	female	83	1.49	37.3857	NO	NKA	no			no			rivaroxiban	None	TKR,DM,	25	32	77	36.21	11.88	105	74.3926	NONE	NONE	NONE	NONE	NONE	0	0	0	0	0	0	0	0	0	0	0		NONE	NONE
00-21-62-18	rivaroxaban 10 mg/ 1 tab(s) Oral Daily	10	63	F	84.5	1.58	33.8487	NO	NKA	NO	NONE	NONE	NONE	NONE	NONE	RIVA	NO	DM, DLD, HTN, HYPOTHYROIDISM, 2YEARS POST TKR	25	14	109	39.18	6.99	48	165.675	NONE	NONE	NONE	NONE	NONE	0	0	0	0	0	0	0	1	0	0	1		NONE	NONE
00-36-21-18	rivaroxaban 10 mg/ 1 tab(s) Oral Daily	10	63	M	102	1.83	30.4578	NO	NKA	NO	NONE	NONE	NONE	NONE	NONE	RIVA	ASA	HTN, DM, DLD, BPH, GOUT, ANEXIETY, ASTHMA, OSTEOPENIA, SLEEVE GASTERECTOMY	31	20	82	40.1	10.79	95	101.046	NONE	NONE	NONE	NONE	NONE	0	0	0	0	0	1	1	0	0	0	1		NONE	NONE
00-44-65-04	rivaroxaban 10 mg/ 1 tab(s) Oral Daily	10	63	F	81	1.565	33.0717	NO	NKA	NO	NONE	NONE	NONE	NONE	NONE	RIVA	NO	TKR, PST SLEEVE, HTN, URTICARIA, DM, DLD	24	16	69	35.89	9.44	55	138.6	NONE	NONE	NONE	NONE	NONE	0	0	0	0	0	1	1	0	0	0	1		NONE	NONE
00-52-53-45	rivaroxaban 10 mg/ 1 tab(s) Oral Daily	10	63	F	78	1.39	40.3706	NO	NKA	NO	NONE	NONE	NONE	NONE	NONE	RIVA	NO	HTN, DLD, DM, TKR, ASTHMA, OA	35	14	99	34	12	85	86.3608	NONE	NONE	NONE	NONE	NONE	0	0	0	0	0	1	1	0	0	0	1		NONE	NONE
00-02-05-61	rivaroxaban 10 mg/ 1 tab(s) Oral Daily	10	63	F	80	1.52	34.626	NO	NKA	NO	NONE	NONE	NONE	NONE	NONE	RIVA	ASA	DM, HTN, DLD, THROMBOCYATHEMIA ON HYDROXYUREA AND ASA, TKR	25	15	98	38.38	5.88	66	114.074	NONE	NONE	NONE	NONE	NONE	0	0	0	0	0	1	0	0	0	0	1		NONE	NONE
00-78-22-53	rivaroxaban 10 mg/ 1 tab(s) Oral Daily	10	63	F	60.7	1.51	26.6216	NO	ASA, EGG, IGG, IGM, PENICILLIN , SULPHA DRUG	NO	NONE	NONE	NONE	NONE	NONE	RIVA	NO	TKR, DM, HTN	30	26	103	36.95	14.52	62	92.1378	NONE	NONE	NONE	NONE	NONE	0	0	0	0	0	1	0	0	0	0	1		NONE	NONE
00-76-50-54	rivaroxaban 10 mg/ 1 tab(s) Oral Daily	10	63	F	120	1.52	51.9391	NO	NKA	NO	NONE	NONE	NONE	NONE	NONE	RIVA	NO	HTN, PE, MORBID OBESE, KNEE REPLACEMENT,	35	14	99	34	12	85	132.863	NONE	NONE	NONE	NONE	NONE	0	0	0	0	0	1	0	0	0	0	0		NONE	NONE
00-15-02-50	rivaroxaban 10 mg/ 1 tab(s) Oral Daily	10	63	F	70	1.57	28.3987	NO	NKA	NO	NONE	NONE	NONE	NONE	NONE	RIVA	NO	TKR	35	14	99	34	12	85	77.5033	NONE	NONE	NONE	NONE	NONE	0	0	0	0	0	0	0	0	0	0	0		NONE	NONE
00-84-99-60	15 mg daily	15	63	male	79	1.65	29.0174	NO	NKA	yes		Left Ventricle thrombus	yes			rivaroxaban	None	DM, HTN, HF, RA	35	14	99	34	12	85	87.468	NONE	NONE	NONE	NONE	NONE	0	0	0	0	0	1	0	0	0	1	1		NONE	NONE
01-01-21-85	15 mg daily	15	63	female	80	1.6	31.25	NO	NKA	no			yes		RHD AF	rivaroxaban	None	CAD, Afib	35	14	99	34	12	85	88.5752	NONE	NONE	NONE	NONE	NONE	0	0	0	0	0	1	0	0	0	0	1		NONE	NONE
02-10-90-55	15 mg daily	15	63	male	91	1.64	33.834	NO	NKA	no			no			rivaroxaban	aspirin, 81 mg, Oral, Daily	FM, HTN, DLD, stroke	9.7	9.6	185	31.7	3.6	176	48.6597	NONE	NONE	NONE	NONE	NONE	0	0	0	0	0	1	1	0	0	0	0		NONE	NONE
00-93-49-34	15 mg daily	15	63	male	120	1.75	39.1837	NO	NKA	no			yes		Atrial fibrillation	Rivaroxiban	None	T2DM,HTN ,Afib,Hyperparathyroidism ,Morbidly obesity,CKD,HFpEF,	44	26	99	33.44	17.88	221	51.1011	NONE	NONE	NONE	NONE	NONE	0	0	0	0	0	0	0	0	0	0	0		NONE	NONE
00-24-50-14	rivaroxaban 15 mg / 1 tab(s) Oral Daily	15	63	F	60	1.54	25.2994	NO	NKA	NO	NONE	NONE	NONE	NONE	NONE	RIVA	ASA	DM, HTN, DLD, IDA, CVA 10 YEARS 2006, LEFT SIDED WEAKNESS AND SLURRED APEECH.	35	14	99	34	12	85	66.4314	NONE	NONE	NONE	NONE	NONE	0	0	0	0	0	0	1	0	0	0	1		NONE	NONE
00-30-04-55	rivaroxaban 15 mg / 1 tab(s) Oral Daily	15	63	F	62	1.5	27.5556	NO	NKA	NO	NONE	NONE	NONE	NONE	NONE	RIVA	NO	AFIB, STROKE 2019, SEIZURE DISORDER POST STROKE, HISTORY OF HTN AND RESOLVED NOT ON MEDICATION CURRENTLY,	14	21	89	33.84	7.63	77	75.7778	NONE	NONE	NONE	NONE	NONE	0	0	0	0	0	1	0	0	0	0	0		NONE	NONE
00-02-84-70	rivaroxaban 15 mg / 1 tab(s) Oral QPM	15	63	M	119	1.73	39.7608	NO	ASA, AUGMENTIN	Yes	?	DVT, PE	NONE	NONE	NONE	RIVA	NO	DM, HTN, PE, DVT, SPINE SURGERY, EGD 6 YEARS BACK SOME EROSION	37	30	60	39.45	22.57	80	139.99	NONE	NONE	NONE	NONE	NONE	0	0	0	0	0	0	0	0	0	0	1		NONE	NONE
10-18-82-95	20 mg daily	20	63	female	50	1.6	19.5312	NO	NKA	yes	43323	PE	no			rivaroxaban	None	HTN, DLD, DM, IHD, PE, R heel ulcer, IDA	9	18	68	14.06	5.43	175	26.8889	NONE	3.9	NONE	NONE	NONE	0	0	0	0	0	1	1	0	0	0	1		NONE	NONE
10-10-29-50	20 mg daily	20	63	male	40	1.58	16.0231	NO	NKA	no			no			rivaroxaban	aspirin, 81 mg, Oral, Daily	CAD, CABG, DM, HTN,	0	26	370	27	12.38	50	75.2889	NONE	NONE	NONE	NONE	NONE	0	0	0	0	0	1	0	0	0	0	1		NONE	NONE
10-09-09-16	20 mg daily	20	63	female	84	1.77	26.8122	NO	NKA	no			yes			rivaroxaban	None	AF, IHD, Renal impairment	28	25	46	43	11.84	127	62.2467	NONE	NONE	NONE	NONE	NONE	0	0	0	0	0	0	0	0	1	0	0		NONE	NONE
01-09-15-04	20 mg daily	20	63	female	58	1.51	25.4375	NO	NKA	yes		DVT	no			rivaroxaban	None	HTN, IDA, DVT	23	15	83	35.74	9.38	75	72.7793	NONE	NONE	NONE	NONE	NONE	0	0	0	0	0	1	0	1	0	0	0		NONE	NONE
01-07-69-41	20 mg daily	20	63	male	98.8	1.67	35.4262	NO	NKA	no			yes			rivaroxaban	ASA, 81 mg, Oral, Daily	DM, IHD, Afib, hypothyrodism	23	13	75	35.52	9.54	68	136.738	NONE	NONE	NONE	NONE	NONE	0	0	0	0	0	0	0	0	0	0	0		NONE	NONE
10-09-34-64	20 mg daily	20	63	male	79.5	1.66	28.8503	NO	NKA	no			no			rivaroxaban	aspirin, 81 mg, Oral, Daily	MCA ischemic stroke, CVA, DM	47	24	67	37	8.28	75	99.7578	NONE	NONE	NONE	NONE	NONE	0	0	0	0	0	0	0	0	0	0	0		NONE	NONE
10-21-39-20	20 mg daily	20	63	male	86.9	1.8	26.821	NO	heparin sodium	yes		CVT, superior sagittal, left transverse and sigmoid sinus thrombosis	no			rivaroxaban	None	HIT, TB, JAK2+ P.Vera high risk, small bowel obstruction and questionable venous ischemia, DVT	17	16	90	36.27	9.94	96	85.1902	NONE	NONE	NONE	NONE	NONE	0	0	0	0	0	0	0	0	0	0	0		NONE	NONE
10-10-42-07	20 mg daily	20	63	female	89	1.46	41.7527	NO	NKA	no			yes			rivaroxaban	None	Afib, Congestive Heart Failure (Severely reduced LV systolic function, EF: <25%)	26	16	77	35.43	10.05	59	141.964	NONE	NONE	NONE	NONE	NONE	0	0	0	0	0	0	0	0	0	0	0		NONE	NONE
10-10-80-36	20 mg daily	20	63	female	114	1.56	46.8442	NO	NKA	no			yes		Afib and flutter	rivaroxaban	None	DCM, HTN, Afib, Morbidly obese, recurrent HF	20	10	86	34.87	10.16	73	146.968	NONE	NONE	NONE	NONE	NONE	0	0	0	0	0	0	0	0	0	0	0		NONE	NONE
10-06-64-58	20 mg daily	20	63	male	85	1.78	26.8274	NO	NKA	no			yes			rivaroxaban	None	Afib, HTN, BPH, BA	13	10	89	35.1	10.03	134	59.6973	NONE	NONE	NONE	NONE	NONE	0	0	0	0	0	0	0	0	0	0	0		NONE	NONE
01-16-49-73	20 mg daily qpm	20	63	female	92	1.47	42.5749	NO	augmentin	no			no			rivaroxiban	None	BA,HTN,ISCHEMIC STROKE,DM,OA	30	25	37.07	97	9.4	53	163.363	NONE	NONE	NONE	NONE	NONE	0	0	0	0	0	1	1	1	0	0	1		NONE	NONE
10-15-44-02	20 mg oral daily	20	63	female	64.5	1.53	27.5535	NO	NKA	no			no			rivaroxiban	None	TKR	19	31	117	34.42	12.56	46	131.96	NONE	NONE	NONE	NONE	NONE	0	0	0	0	0	0	0	0	0	0	0		NONE	NONE
10-14-13-23	20 mg oral tablet, 1 tab(s), Oral, qPM	20	63	female	81.5	1.53	34.8157	NO	NKA	no			yes		a-fib	rivaroxiban	None	DM,HTN,AF,HEP C, Non-Hodgkin's B cell lymphoma	40	15	119	40.47	7.53	57	134.562	NONE	NONE	NONE	NONE	NONE	0	0	0	0	0	1	0	0	0	0	0		NONE	NONE
10-11-64-16	20 mg oral tablet, 1 tab(s), Oral, qPM	20	63	female	74	1.49	33.3318	NO	NKA	yes		DVT	no			rivaroxiban	aspirin 81 mg	T2DM,DVT,HTN,SEIZURE,	16	15	73	36.5	6.4	66	105.519	NONE	NONE	NONE	NONE	NONE	0	0	0	0	0	0	0	0	0	0	0		NONE	NONE
00-87-87-23	20 mg oral tablet, 20 mg, 1 tab(s), NG Tube, Daily,	20	63	female	90	1.62	34.2936	NO	NKA	no			yes			rivaroxaban	None	HTN, DM, stoke, seizure	24	33	161	31.42	5.39	54	156.852	NONE	NONE	NONE	NONE	NONE	0	0	0	0	0	1	0	0	0	0	1		NONE	NONE
01-15-26-12	20 mg table orally aily	20	63	female	85	1.6	33.2031	NO	NKA	no			yes		A-fib	rivaroxiban	None	HTN,HF	14	0	0	31.2	17.14	106	75.4665	NONE	NONE	NONE	NONE	NONE	0	0	0	0	0	0	1	0	0	0	0		NONE	NONE
00-86-34-33	20 mg, Oral, Daily	20	63	female	91.2	1.51	39.9982	NO	NKA	no			yes			rivaroxaban	plavix	HTN, DM, DLD, IHD, OA	28	20	99	34	12	54	158.943	NONE	NONE	NONE	NONE	NONE	0	0	0	0	0	1	1	0	0	0	1		NONE	NONE
00-30-76-32	rivaroxaban 20 mg/ 1 tab(s) Oral Daily	20	63	F	80	1.486	36.2287	NO	NKA	NO	NONE	NONE	NONE	NONE	NONE	RIVA	NO	DLD, DM , HTN, HFPEF, AFIB	35	14	99	34	12	85	88.5752	NONE	NONE	NONE	NONE	NONE	0	0	0	0	0	1	0	0	0	1	1		NONE	NONE
00-10-62-75	rivaroxaban 20 mg/ 1 tab(s) Oral Daily	20	63	F	85	1.57	34.4842	NO	NKA	NO	NONE	NONE	NONE	NONE	NONE	RIVA	NO	DM, EBSTEIN ANAMOLY, A. FLUTTER, AFIB, HYPOTHYROIDISM	89	22	91	34.26	14.89	56	142.847	NONE	NONE	NONE	NONE	NONE	0	0	0	0	0	1	1	0	0	0	1		NONE	NONE
00-80-40-74	rivaroxaban 20 mg/ 1 tab(s) Oral Daily	20	63	F	103.5	1.56	42.5296	NO	NKA	NO	NONE	NONE	NONE	NONE	NONE	RIVA	NO	AFIB, HTN, DM, HYPOTHYROIDISM,	35	14	99	34	12	85	114.594	NONE	NONE	NONE	NONE	NONE	0	0	0	0	0	1	1	0	0	0	1		NONE	NONE
00-51-30-99	rivaroxaban 20 mg/ 1 tab(s) Oral Daily	20	63	M	70	1.78	22.0932	NO	NKA	Yes	41091	PE	NONE	NONE	NONE	RIVA	NO	DM, HTN, HYPERCHOLESTEROLEMIA, PARAPLAGIA , RECURRENT PE DIAGNOSED 7-2012 AND 2ND EPISODES 4-12	35	14	99	34	12	85	77.5033	NONE	NONE	NONE	NONE	NONE	0	0	0	0	0	1	0	0	0	0	1		NONE	NONE
00-26-11-85	rivaroxaban 20 mg/ 1 tab(s) Oral Daily	20	63	F	88	1.56	36.1604	NO	NKA	NO	NONE	NONE	NONE	NONE	NONE	RIVA	NO	PAFIB, HYPOTHYROIDISM, PALPITATION,	20	9	80	37.21	7.32	58	142.789	NONE	NONE	NONE	NONE	NONE	0	0	0	0	0	1	1	0	0	0	0		NONE	NONE
00-18-96-40	rivaroxaban 20 mg/ 1 tab(s) Oral Daily	20	63	M	92	1.82	27.7744	NO	NKA	NO	NONE	NONE	NONE	NONE	NONE	RIVA	NO	CHRONIC SCHIZOPHRENIA, COGNITIVE DECLINE, DLD, TARDIVE DYSKINESIA	27	16	77	46.06	9.59	85	101.861	NONE	NONE	NONE	NONE	NONE	0	0	0	0	0	1	0	0	0	0	0		NONE	NONE
00-87-58-11	15 mg oral tablet, 15 mg, Oral, BID	30	63	female	65	1.53	27.7671	NO	NKA	yes	14-2-19	Provoked PE	no			rivaroxaban	None	HTN, DM, hypothyrodism	13	8	79	28	5.33	47	130.154	NONE	NONE	NONE	NONE	NONE	0	0	0	0	0	1	1	0	0	0	1		NONE	NONE
00-08-85-46	rivaroxaban15MG BID	30	63	F	64	1.52	27.7008	NO	NKA	NO	NONE	NONE	NONE	NONE	NONE	RIVA	ASA	BA, GERD, HTN,BRAST CA DID SURGERY	21	15	115	37.83	12.79	62	97.147	NONE	NONE	NONE	NONE	NONE	0	0	0	0	0	1	0	0	0	0	0		NONE	NONE
10-16-81-13	10 mg daily	10	64	female	75	1.6	29.2969	NO	NKA	no			no			rivaroxiban	None	TIA, stroke in Rt Pons, DM, HTN	35	14	99	34	12	85	81.9608	NONE	NONE	NONE	NONE	NONE	0	0	0	0	0	1	0	0	0	0	1		NONE	NONE
10-10-32-86	10 mg daily	10	64	male	116	1.75	37.8776	NO	NKA	no			no			rivaroxaban	None	TKR, HTN, DM	30	27	111	30.59	17.23	46	234.242	NONE	NONE	NONE	NONE	NONE	0	0	0	0	0	1	0	0	0	0	1		NONE	NONE
10-09-06-84	10 mg daily	10	64	female	54	1.5	24	NO	NKA	no			no			rivaroxaban	None	TKR	12	11	95	24.41	6.09	51	98.3529	NONE	NONE	NONE	NONE	NONE	0	0	0	0	0	0	0	1	0	0	0		NONE	NONE
10-19-69-73	10 mg daily	10	64	male	93.2	1.74	30.7835	NO	NKA	no			no			rivaroxaban	None	HTN, Fracture right distal femur	19	19	107	25.59	5.05	87	99.5086	NONE	NONE	NONE	NONE	NONE	0	0	0	0	0	1	0	0	0	0	0		NONE	NONE
10-06-89-94	10 mg daily	10	64	female	65	1.54	27.4077	NO	banana	no			no			rivaroxaban	None	DM, HTN, BA, HBV	31	33	116	34.1	19.29	41	147.263	NONE	NONE	NONE	NONE	NONE	0	0	0	0	0	0	0	0	0	0	0		NONE	NONE
10-19-92-20	10 mg daily	10	64	female	78.6	1.67	28.1832	NO	NKA	no			no			rivaroxaban	None	TKR, Knee pain	45	23	66	28.42	7.73	40	182.527	NONE	NONE	NONE	NONE	NONE	0	0	0	0	0	0	0	0	0	0	0		NONE	NONE
01-16-53-01	10 mg for 14 days	10	64	female	87	1.56	35.7495	NO	NKA	no			no			rivaroxiban	None	TKR,OA	12	9	91	24.48	6.03	44	183.667	NONE	NONE	NONE	NONE	NONE	0	0	0	0	0	1	0	0	0	0	1		NONE	NONE
00-89-84-64	10 mg oral daily for 21 days then for 7 days	10	64	female	84	1.5	37.3333	NO	NKA	no			no			rivaroxaban	aspirin, 81 mg, Oral, Daily	osteoprosis, DLD, HTN, DM hypothyroid, TKR	11	11	59	26.71	10.8	41	190.309	NONE	NONE	NONE	NONE	NONE	0	0	0	0	0	1	0	1	0	0	1		NONE	NONE
10-15-33-30	10 mg oral for 16 days	10	64	female	72	1.55	29.9688	NO	NKA	no			no			rivaroxiban	None	TKR	25	23	79	43.4	11.68	43	155.535	NONE	NONE	NONE	NONE	NONE	0	0	0	0	0	0	0	0	0	0	0		NONE	NONE
00-19-50-37	rivaroxaban 10 mg/ 1 tab(s) Oral Daily	10	64	F	60.4	1.49	27.206	NO	NKA	NO	NONE	NONE	NONE	NONE	NONE	RIVA	NO	DM, HTN, TKR, DLD	35	14	99	34	12	85	66.0058	NONE	NONE	NONE	NONE	NONE	0	0	0	0	0	0	1	0	0	0	1		NONE	NONE
00-31-15-28	rivaroxaban 10 mg/ 1 tab(s) Oral Daily	10	64	F	55	1.6	21.4844	NO	NKA	Yes	2017	DVT	NONE	NONE	NONE	RIVA	ASA	DVT, ALZHEIMER DISEASE , ANEXIETY, DM, HTN	35	14	99	34	12	85	60.1046	NONE	NONE	NONE	NONE	NONE	0	0	0	0	0	1	0	0	0	0	1		NONE	NONE
00-39-42-41	rivaroxaban 10 mg/ 1 tab(s) Oral Daily	10	64	F	64	1.6	25	NO	NKA	NO	NONE	NONE	NONE	NONE	NONE	RIVA	NO	CARDIOMYOPATHY, DM HTN, HYPERTHYROIDISM, IHD, MS, NEPHROPATHY, TIA ON RIVAR.,	17	15	104	37.82	6.95	145	40.9992	NONE	NONE	NONE	NONE	NONE	0	0	0	0	0	1	0	0	0	0	1		NONE	NONE
00-03-05-43	rivaroxaban 10 mg/ 1 tab(s) Oral Daily	10	64	F	85	1.61	32.7919	NO	AUGMENTIN	NO	NONE	NONE	NONE	NONE	NONE	RIVA	NO	TKR, DM, DLD, OA	39	31	68	42.34	9.46	72	109.66	NONE	NONE	NONE	NONE	NONE	0	0	0	0	0	1	0	0	0	0	1		NONE	NONE
00-82-24-62	rivaroxaban 10 mg/ 1 tab(s) Oral Daily	10	64	M	91.6	1.715	31.1435	NO	ceftriaxone and ciprofloxacin	NO	NONE	NONE	NONE	NONE	NONE	RIVA	NO	DM, HTN, LV THROMBUS , AF	35	14	99	34	12	85	100.101	NONE	NONE	NONE	NONE	NONE	0	0	0	0	0	1	0	0	0	0	1		NONE	NONE
00-40-88-74	rivaroxaban 10 mg/ 1 tab(s) Oral Daily	10	64	M	64.7	1.61	24.9605	NO	NKA	Yes	2015	PE	NONE	NONE	NONE	RIVA	NO	DLD, DM, GI BLEEDING M PE WAS ON ENOXA	35	14	99	34	12	85	70.7048	NONE	NONE	NONE	NONE	NONE	0	0	0	0	0	1	0	0	0	0	1		NONE	NONE
00-46-36-64	rivaroxaban 10 mg/ 1 tab(s) Oral Daily	10	64	F	71	1.64	26.398	NO	NKA	NO	NONE	NONE	NONE	NONE	NONE	RIVA	NO	TKR, HYPOTHYROIDISM	17	16	65	35.7	11.92	47	140.322	NONE	NONE	NONE	NONE	NONE	0	0	0	0	0	0	0	1	0	0	0		NONE	NONE
00-36-11-72	rivaroxaban 10 mg/ 1 tab(s) Oral Daily	10	64	F	83	1.5	36.8889	NO	NKA	NO	NONE	NONE	NONE	NONE	NONE	RIVA	NO	TKR	35	14	99	34	12	85	90.7033	NONE	NONE	NONE	NONE	NONE	0	0	0	0	0	0	0	0	0	0	0		NONE	NONE
00-36-63-43	rivaroxaban 10 mg/ 1 tab(s) Oral Daily	10	64	F	80	1.5	35.5556	NO	NKA	NO	NONE	NONE	NONE	NONE	NONE	RIVA	NO	OA , RT TKR	35	14	99	34	12	85	87.4248	NONE	NONE	NONE	NONE	NONE	0	0	0	0	0	0	0	0	0	0	0		NONE	NONE
00-45-97-65	rivaroxaban 10 mg/ 1 tab(s) Oral Daily	10	64	M	82	1.63	30.863	NO	NKA	NO	NONE	NONE	NONE	NONE	NONE	RIVA	NO	POST RTA, TOTAL HIP REPLACEMENT ,	20	22	70	29.34	23.13	73	104.341	NONE	NONE	NONE	NONE	NONE	0	0	0	0	0	0	0	0	0	0	0		NONE	NONE
00-86-34-57	15 mg oral qPM	15	64	male	71	1.67	25.4581	yes	dust	no			yes			rivaroxaban	aspirin	HTN, DM, IHD, CKD, COPD, stroke	15	31	159	29.79	5.71	157	42.0071	NONE	NONE	NONE	NONE	NONE	0	0	0	0	0	1	0	1	0	0	1		NONE	NONE
10-24-44-09	15 mg daily	15	64	female	70	1.7	24.2215	NO	NKA	no			yes			rivaroxaban	None	ASD, HFpEF, HTN, DM	13	20	56	41.35	17.86	62	104.875	NONE	NONE	NONE	NONE	NONE	0	0	0	0	0	1	0	0	0	1	1		NONE	NONE
01-12-60-03	15 mg daily	15	64	female	91.8	1.63	34.5515	no	NKA	no			no			rivaroxaban	None	TKR, obesity, BA, hypothyrodism	19	17	71	39.45	11.23	54	157.911	NONE	NONE	NONE	NONE	NONE	0	0	0	0	0	1	0	0	0	0	1		NONE	NONE
01-14-80-34	15 mg daily	15	64	female	80	1.6	31.25	NO	NKA	no			None			rivaroxiban	None		35	14	99	34	12	85	87.4248	NONE	NONE	NONE	NONE	NONE	0	0	0	0	0	1	0	0	0	0	1		NONE	NONE
10-05-17-73	15 mg daily	15	64	male	80.3	1.61	30.9787	NO	NKA	yes		upper DVT	yes		PAF	rivaroxaban	aspirin, 81 mg, Oral, Daily	DM, HTN, DLD, ischemic cardiomyopathy, Arrhythmia	6	29	69	20	37.09	178	41.9044	NONE	NONE	NONE	NONE	NONE	0	0	0	0	0	0	0	0	0	1	0		NONE	NONE
02-47-60-08	15 mg daily	15	64	female	65	1.63	24.4646	NO	NKA	no			None			rivaroxaban	None		35	14	99	34	12	85	71.0327	NONE	NONE	NONE	NONE	NONE	0	0	0	0	0	1	0	0	1	0	0		NONE	NONE
01-16-65-37	15 mg daily qpm	15	64	male	86	1.6	33.5937	no	NKA	no			yes		A-FIB	rivaroxiban	aspirin 81 oral daily	a-fib,ischemicheart dissease ,LV failure,	20	14	63	36.78	10.25	99	80.6914	NONE	NONE	NONE	NONE	NONE	0	0	0	0	0	0	0	0	0	0	0		NONE	NONE
10-14-48-44	15 mg oral daily	15	64	male	64	1.55	26.6389	yes	NKA	no			yes		a-fib	rivaroxiban	None	DM,HTN,AF,NICMP	18	14	84	33.92	17.68	146	40.7184	NONE	NONE	NONE	NONE	NONE	0	0	0	0	0	1	0	0	0	0	1		NONE	NONE
10-13-10-39	15 mg oral daily	15	64	male	93	1.73	31.0735	NO	NKA	no			yes		a-fib	rivaroxiban	None	afib,CKD,DILATED CARDIOMYOPATHY	22	17	107	36.26	12.63	188	45.9504	NONE	NONE	NONE	NONE	NONE	0	0	0	0	0	0	0	0	0	1	0		NONE	NONE
01-16-88-21	15 mg orally qpm	15	64	male	98	1.75	32	yes	NKA	no			no			rivaroxiban	aspirin 81 mg oral daily	PVD,HTN,DMCKD	22	14	99	29	6.57	124	73.4122	NONE	NONE	NONE	NONE	NONE	0	0	0	0	0	0	0	0	0	0	0		NONE	NONE
00-75-36-36	rivaroxaban 15 mg / 1 tab(s) Oral Daily	15	64	M	92	1.7	31.8339	NO	NKA	NO	NONE	NONE	NONE	NONE	NONE	RIVA	ASA	AFIB, IHD, DM, HTN, AFIB	28	24	56	35.54	16.96	118	72.4218	NONE	NONE	NONE	NONE	NONE	0	0	0	0	0	1	0	0	0	0	1		NONE	NONE
00-32-57-26	rivaroxaban 15 mg / 1 tab(s) Oral Daily	15	64	M	85.3	1.68	30.2225	NO	NKA	NO	NONE	NONE	NONE	NONE	NONE	RIVA	ASA	, EF 20%, GERD LBBB, QRS,	44	26	92	35.5	9.95	93	85.1981	NONE	NONE	NONE	NONE	NONE	0	0	0	0	0	1	0	0	1	0	0		NONE	NONE
00-59-52-43	rivaroxaban 15 mg / 1 tab(s) Oral Daily	15	64	M	98	1.66	35.5639	NO	NKA	NO	NONE	NONE	NONE	NONE	NONE	RIVA	ASA	AFIB, HFPEF, POST SLEEVE GASTERECTOMY, HFPEF	38	80	82	28.04	9.73	76	119.778	NONE	NONE	NONE	NONE	NONE	0	0	0	0	0	1	0	0	1	0	0		NONE	NONE
00-67-16-41	rivaroxaban 15 mg / 1 tab(s) Oral Daily	15	64	F	80	1.54	33.7325	NO	MORPHINE	NO	NONE	NONE	NONE	NONE	NONE	RIVA	NO	BREAST CA, HTN, PE IN 2017, ISCHEMIA STRESS INDUCED	25	25	99	37.76	9.92	67	110.912	NONE	NONE	NONE	NONE	NONE	0	0	0	0	0	1	0	0	0	0	0		NONE	NONE
00-17-31-96	rivaroxaban 20 mg/ 1 tab(s) Oral DailyTHEN 15MG OD	15	64	F	83	1.62	31.6263	NO	NKA	NO	NONE	NONE	NONE	NONE	NONE	RIVA	NO	DM, HTN, PAROX AFIB	35	14	99	34	12	85	90.7033	NONE	NONE	NONE	NONE	NONE	0	0	0	0	0	1	0	0	0	0	1		NONE	NONE
10-19-91-24	20 mg daily	20	64	female	107.2	1.6	41.875	NO	NKA	no			yes			rivaroxaban	None	SLE, Afib, DM, HTN, DLD, obese, HFpEF	20	14	79	36.94	7.58	54	184.402	NONE	NONE	NONE	NONE	NONE	0	0	0	0	0	1	0	0	0	1	1		NONE	NONE
10-08-82-01	20 mg daily	20	64	female	93	1.46	43.6292	NO	NKA	no			yes			rivaroxaban	aspirin, 81 mg, Oral, Daily	obesity, DM, HTN, Heart valve disease, recurrent UTI, Cholecystectomy	16	13	147	34.73	6.78	68	127.039	NONE	NONE	NONE	NONE	NONE	0	0	0	0	0	0	0	0	0	1	1		NONE	NONE
02-26-94-28	20 mg daily	20	64	female	105	1.6	41.0156	NO	NKA	no			yes		PAF	rivaroxaban	None	PAF, HTN, DM, DLD	20	14	126	26	3.85	239	40.8089	NONE	NONE	NONE	5	NONE	0	0	0	0	0	1	1	0	0	0	1		NONE	NONE
02-29-11-57	20 mg daily	20	64	female	67	1.5	29.7778	NO	NKA	no			yes		PAF	rivaroxaban	None	HTN, DM, PAF, hypothyrodism	27	17	81	31.66	4.34	64	97.2431	NONE	NONE	NONE	NONE	NONE	0	0	0	0	0	1	1	0	0	0	1		NONE	NONE
10-16-98-81	20 mg daily	20	64	male	67.2	1.62	25.6059	yes	NKA	no			yes			rivaroxiban	None	DM, DLD, HTN, IHD S/P CABG and AVR, Afib, COPD	31	48	603	29.41	21.49	171	36.5037	NONE	NONE	NONE	NONE	NONE	0	0	0	0	0	1	1	0	0	0	1		NONE	NONE
10-01-16-97	20 mg daily	20	64	female	90.5	1.57	36.7155	NO	NKA	yes		PE, DVT	no			rivaroxaban	aspirin, 81 mg, Oral, Daily	DM, edema, HTN, Productive cough	21	17	80	37.1	11.04	68	123.624	NONE	NONE	NONE	NONE	NONE	0	0	0	0	0	1	0	0	0	0	1		NONE	NONE
01-09-57-41	20 mg daily	20	64	female	80	1.6	31.25	NO	NKA	no			no			rivaroxaban	None		20	14	91	41.18	6.32	76	97.7778	NONE	NONE	NONE	NONE	NONE	0	0	0	0	0	1	0	0	0	0	1		NONE	NONE
10-10-50-61	20 mg daily	20	64	female	80	1.6	31.25	NO	plasil	no			yes			rivaroxaban	None	HTN, Afib, DM, CHF, CVA, PUD, PSYCHIATRIC DISORDER	10	0	0	30.8	3.95	137	54.2417	NONE	NONE	NONE	NONE	NONE	0	0	0	0	0	0	0	0	0	1	0		NONE	NONE
10-08-06-87	20 mg daily	20	64	female	94	1.57	38.1354	NO	NKA	no			yes			rivaroxaban	None	HTN, DM, BA, Afib, tubercluma	18	25	94	27.93	9.93	76	114.889	NONE	NONE	NONE	NONE	NONE	0	0	0	0	0	0	0	1	0	0	0		NONE	NONE
10-09-76-44	20 mg daily	20	64	female	156	1.76	50.3616	NO	NKA	no			yes		PAF	rivaroxaban	None	HTN, DM, Obesity, PAF	16	7	84	32.01	7.6	63	230.011	NONE	NONE	NONE	NONE	NONE	0	0	0	0	0	1	1	0	0	0	0		NONE	NONE
10-04-42-04	20 mg daily	20	64	female	109.5	1.56	44.9951	NO	ALLERGY TO MIMPARA MEDICATION	no			no			rivaroxaban	None	HTN, thrombophlebitis and parathyroid adenoma	71	38	95	30	7.37	60	169.522	NONE	NONE	NONE	NONE	NONE	0	0	0	0	1	0	0	0	0	0	0		NONE	NONE
02-42-64-67	20 mg daily	20	64	male	140	1.62	53.3455	NO	NKA	no			yes			rivaroxaban	aspirin, 81 mg, Oral, Daily, clopedogril 75 mg daily	Afib, CVA, Morbid obesity	20	15	50	36.19	29.13	57	228.148	NONE	NONE	NONE	NONE	NONE	0	0	0	0	0	0	0	0	0	0	0		NONE	NONE
01-16-48-60	20 mg daily qpm	20	64	male	123	1.57	49.9006	NO	NKA	no			yes		A-FIB	rivaroxiban	aspirin 81 oral daily , clopidogrel 75 oral daily	CHF,IHD,A-fib	21.3	22.4	59	36.86	20	57	200.444	NONE	NONE	NONE	NONE	NONE	0	0	0	0	0	0	0	0	0	0	0		NONE	NONE
01-18-58-33	20 mg ora qpm	20	64	female	67	1.47	31.0056	NO	NKA	no			no			rivaroxiban	None	multinodular goiter	25	24	84	36	6.84	46	135.295	NONE	NONE	NONE	NONE	NONE	0	0	0	0	0	1	0	0	0	0	0		NONE	NONE
00-85-69-29	20 mg, Oral, Daily	20	64	male	111	1.76	35.8342	NO	NKA	yes	42403	unprovoked PULMONARY EMBOLISM	no			rivaroxaban	None	HTN, DLD, eczema, BPH, anxiety, OA, GORD	31	23	75	43.11	11.05	113	91.2448	NONE	4.3	NONE	NONE	NONE	0	0	0	0	0	1	0	0	0	0	1		NONE	NONE
00-89-62-44	20 mg, Oral, qPM	20	64	male	71.3	1.65	26.1892	NO	NKA	yes		Deep vein thrombosis	no			rivaroxaban	None	DVT,	25	15	67	38.92	26.15	83	79.7949	NONE	NONE	NONE	NONE	NONE	0	0	0	0	0	0	0	0	0	0	0		NONE	NONE
00-00-68-65	rivaroxaban 20 mg / 1 tab(s) Oral QPM	20	64	M	72	1.69	25.2092	NO	NKA	Yes	NOT CLEAR	DVT	NONE	NONE	NONE	PREVIOUSLY ON WARFARIN BUT WITH RECURRENT DVT THENY CHANGE TO Rivaroxaban	NONE	BA, AR, GERD, RECURRENT DVT	23	13	55	36.38	7.72	84	79.619	NONE	NONE	NONE	NONE	NONE	1	0	0	0	0	1	1	0	0	1	1		NONE	NONE
00-02-82-88	rivaroxaban 20 mg / 1 tab(s) Oral QPM	20	64	F	80	1.6	31.25	NO	…	NO	NONE	NONE	NONE	NONE	NONE	RIVA	CLOPIDOGRIL IN 2018, NOW NOTHING	DM, HTN	35	14	99	34	12	85	87.4248	NONE	NONE	NONE	NONE	NONE	0	0	0	0	0	0	0	0	0	0	1		NONE	NONE
00-00-94-38	rivaroxaban 20 mg / 1 tab(s) Oral QPM	20	64	F	75	1.57	30.4272	NO	NKA	NO	NONE	NONE	NONE	NONE	NONE	RIVA	ASA	HTN, PAROXYSMAL AFIB	18	12	69	34.02	10.65	50	139.333	NONE	NONE	NONE	NONE	NONE	0	0	0	0	0	1	0	0	0	0	0		NONE	NONE
00-68-32-28	rivaroxaban 20 mg/ 1 tab(s) Oral Daily	20	64	F	77.5	1.61	29.8985	NO	NKA	NO	NONE	NONE	NONE	NONE	NONE	RIVA	ASA. CLOPIDO	DM, HTN, HYPOTHYROIDISM, AF, IHD	35	14	99	34	12	85	84.6928	NONE	NONE	NONE	NONE	NONE	0	0	0	0	0	1	1	0	0	0	1		NONE	NONE
00-09-63-26	rivaroxaban 20 mg/ 1 tab(s) Oral Daily	20	64	F	101	1.5	44.8889	NO	NKA	NO	NONE	NONE	NONE	NONE	NONE	RIVA	NO	DM, HTN, DLD, HYPOTHYROIDISM ,OA , AFIB,	30	23	144	26.9	11.63	81	115.824	NONE	NONE	NONE	NONE	NONE	0	0	0	0	0	1	1	0	0	0	1		NONE	NONE
00-19-04-92	rivaroxaban 20 mg/ 1 tab(s) Oral Daily	20	64	M	55	1.59	21.7555	NO	NKA	NO	NONE	NONE	NONE	NONE	NONE	RIVA	NO	PERSISTANT A FIB, ON RIVA, STROKE ON APIXIBAN 2YEars , PLAVIX WAS STOPPED, DM, HYPOTHYROIDISM	17	17	67	33.88	7.68	66	77.4074	NONE	NONE	NONE	NONE	NONE	0	0	0	0	0	1	1	0	0	0	1		NONE	NONE
00-08-79-56	rivaroxaban 20 mg/ 1 tab(s) Oral Daily	20	64	F	108	1.55	44.9532	NO	LYRICA, CEFUROXIME	NO	NONE	NONE	NONE	NONE	NONE	RIVA	NO	DM, DLD, CVA, HTN,	33	17	59	40.14	11.06	60	167.2	NONE	NONE	NONE	NONE	NONE	0	0	0	0	0	1	0	0	0	0	1		NONE	NONE
00-07-90-94	rivaroxaban 20 mg/ 1 tab(s) Oral Daily	20	64	M	68	1.61	26.2336	NO	NKA	NO	NONE	NONE	NONE	NONE	NONE	RIVA	NO	PAFIB, COLON CA, DM, DLD, HTN,	31	11	108	36.22	17.65	107	59.0322	NONE	NONE	NONE	NONE	NONE	0	0	0	0	0	1	0	0	0	0	1		NONE	NONE
00-43-76-59	rivaroxaban 20 mg/ 1 tab(s) Oral Daily	20	64	M	71	1.7	24.5675	NO	NKA	NO	NONE	NONE	NONE	NONE	NONE	RIVA	ASA	IHD, HX OF BYPASS GASTRIC SURGERY	35	31	81	37.92	11.45	82	80.4282	NONE	NONE	NONE	NONE	NONE	0	0	0	0	0	0	0	0	0	0	0		NONE	NONE
00-70-60-77	rivaroxaban 20 mg/ 1 tab(s) Oral Daily	20	64	F	72	1.52	31.1634	NO	SHRIMP	NO	NONE	NONE	NONE	NONE	NONE	RIVA	NO	BA, OSTEOPOROSIS, RIGHT LEG DVT IN 2018, DEPRESSION	24	14	99	32.5	4.21	79	84.6582	NONE	NONE	NONE	NONE	NONE	0	0	0	0	0	0	0	0	0	0	0		NONE	NONE
00-17-62-36	rivaroxaban 20 mg/ 1 tab(s) Oral Daily	20	64	M	60	1.57	24.3418	NO	NKA	NO	NONE	NONE	NONE	NONE	NONE	RIVA	NO	CVA, AFIB	176	100	157	27.1	30.72	14.96	372.549	NONE	NONE	NONE	NONE	NONE	0	0	0	0	0	0	0	0	0	0	0		NONE	NONE
00-61-79-19	rivaroxaban15MG BID (21 DAYS) THEN HEPARINE INFUSION	30	64	F	101	1.46	47.3822	NO	NKA	NO	NONE	NONE	NONE	NONE	NONE	RIVA	NO	PAPILLARY THYROID CARCINOMA, HTN, DM, DLD, DYSRRYTHMIA, FOCAL NODULAR HYPERPLASIA, OBESITY,	13	9	98	32.51	6.23	120	78.1815	NONE	NONE	NONE	NONE	NONE	0	0	0	0	0	1	1	0	0	0	1		NONE	NONE
01-05-38-92	10 mg daily	10	65	female	71.5	1.45	34.0071	NO	NKA	no			no			rivaroxaban	None	hypothyrodism, TKR, Alteration in comfort: pain	17	23	135	40.91	10.86	57	114.985	NONE	NONE	NONE	NONE	NONE	0	0	0	0	0	1	0	0	0	0	1		NONE	NONE
10-22-97-59	10 mg daily	10	65	female	97	1.6	37.8906	NO	NKA	no			no			rivaroxaban	None	DM, HTN, POST LEFT TKR	14	16	101	24.91	8.19	63	141.138	NONE	NONE	NONE	NONE	NONE	0	0	0	0	0	1	0	0	0	0	1		NONE	NONE
10-20-45-27	10 mg daily	10	65	male	99	1.69	34.6627	NO	NKA	no			no			rivaroxaban	None	TKR, DM, anxiety	21	12	74	32.01	9.84	80	113.438	NONE	NONE	NONE	NONE	NONE	0	0	0	0	0	0	0	0	0	0	1		NONE	NONE
10-09-65-80	10 mg daily	10	65	female	97	1.58	38.856	NO	NKA	yes	2017	Provoked Right LL DVT	no			rivaroxaban	None	DVT, DLD, HTN, morbidly obese	19	19	76	33.91	7.73	57	155.994	NONE	0.46	NONE	NONE	NONE	0	0	0	0	0	0	0	0	0	0	1		NONE	NONE
10-23-39-03	10 mg daily	10	65	male	71.5	1.65	26.2626	NO	NKA	no			no			rivaroxaban	None	TKR, BPH, HTN	45	22	96	41.05	14.6	88	74.4792	NONE	NONE	NONE	NONE	NONE	0	0	0	0	0	1	0	0	0	0	0		NONE	NONE
00-97-73-10	10 mg daily	10	65	female	109	1.66	39.5558	NO	NKA	no			no			rivaroxaban	None	flat foot	37	74	54	32	15.78	54	185.031	NONE	NONE	NONE	NONE	NONE	0	0	0	0	0	0	0	0	0	0	0		NONE	NONE
00-97-92-09	10 mg daily	10	65	female	99	1.55	41.2071	NO	NKA	no			no			rivaroxaban	None	knee pain	35	34	93	27.64	15.27	43	211.047	NONE	NONE	NONE	NONE	NONE	0	0	0	0	0	0	0	0	0	0	0		NONE	NONE
10-15-51-90	10 mg oral for 21 days	10	65	female	91	1.625	34.4615	NO	NKA	no			no			rivaroxiban	None	TKR,DM,HTN,DL,HYPOTHYRODSIM,	29	12	134	37.06	7.89	50	166.833	NONE	NONE	NONE	NONE	NONE	0	0	0	0	0	1	0	1	0	0	1		NONE	NONE
10-11-79-88	10 mg orally qpm	10	65	female	90	1.47	41.6493	NO	NKA	no			no			rivaroxiban	None	TKR	20	26	105	22.13	12.04	60	137.5	NONE	NONE	NONE	NONE	NONE	0	0	0	0	0	1	0	0	0	0	1		NONE	NONE
00-86-46-28	10 mg, Oral, Daily	10	65	female	89.3	1.63	33.6106	NO	NKA	no			no			rivaroxaban	None	HTN, DM, TKR	35	14	99	34	12	85	96.3039	NONE	NONE	NONE	NONE	NONE	0	0	0	0	0	1	0	0	0	0	1		NONE	NONE
01-18-68-27	10mg TAB, 15 mg, 1.5 tab(s), Oral, Daily	10	65	female	49.6	1.48	22.6443	NO	NKA	no			yes		A-fib	rivaroxiban	None	DM,AFIB,IHD,HTN,CKD,severe pulmonary dissase	31	62	200	27	40.97	235	19.3475	NONE	NONE	NONE	NONE	NONE	0	0	0	0	0	0	0	0	0	0	1		NONE	NONE
00-12-27-77	rivaroxaban 10 mg Oral Daily	10	65	F	94.6	1.54	39.8887	NO	NKA	NO	NONE	NONE	NONE	NONE	NONE	RIVA	NO	BA, BILATERAL TKR	35	14	99	34	12	85	102.02	NONE	NONE	NONE	NONE	NONE	0	0	0	0	0	0	0	0	0	0	0		NONE	NONE
00-02-59-40	rivaroxaban 10 mg/ 1 tab(s) Oral Daily	10	65	F	60	1.51	26.3146	NO	NKA	NO	NONE	NONE	NONE	NONE	NONE	RIVA	NO	TKR, DM	35	14	99	34	12	85	64.7059	NONE	NONE	NONE	NONE	NONE	0	0	0	0	0	1	0	1	0	1	0		NONE	NONE
00-82-66-26	rivaroxaban 10 mg/ 1 tab(s) Oral Daily	10	65	M	76	1.585	30.2521	NO	NKA	Yes	2018	DVT	NONE	NONE	NONE	RIVA	NO	BPH, DLD, OSTEOPOROSIS, QUADRICEPS WEAKNESS, VERTIGO, DVT	21	15	71	35.6	16.76	67	103.98	NONE	NONE	NONE	NONE	NONE	0	0	0	0	0	0	1	0	0	0	0		NONE	NONE
00-08-01-81	rivaroxaban 10 mg/ 1 tab(s) Oral Daily	10	65	F	68	1.48	31.0446	NO	NKA	NO	NONE	NONE	NONE	NONE	NONE	RIVA	NO	HTN, OA, TKR	35	104	81	31.78	12.1	49	127.211	NONE	NONE	NONE	NONE	NONE	0	0	0	0	0	1	0	0	0	0	0		NONE	NONE
00-76-99-02	rivaroxaban 10 mg/ 1 tab(s) Oral Daily	10	65	F	87	1.62	33.1504	NO	NKA	NO	NONE	NONE	NONE	NONE	NONE	RIVA	ASA	LIVER CIRRHOSIS, PORTAL VEIN THROMBOSIS MORE THAN 15 YEARS AGO, PATIENT ON ASA AND ENOXA PARINE	22	14	96	38.1	18.4	27	295.37	NONE	NONE	NONE	NONE	NONE	0	0	0	0	0	0	0	0	0	0	0		NONE	NONE
00-45-60-97	rivaroxaban 10 mg/ 1 tab(s) Oral Daily	10	65	M	93.8	1.8	28.9506	NO	NKA	Yes	2017	DVT	NONE	NONE	NONE	RIVA	ASA	IDIOPATHIC RT DVT	40	23	97	37.22	6.88	110	78.1667	NONE	NONE	NONE	NONE	NONE	0	0	0	0	0	0	0	0	0	0	0		NONE	NONE
10-19-35-69	15 mg daily	15	65	male	74	1.65	27.1809	NO	NKA	no			no			rivaroxaban	None	Ca brostate, ischemic stroke, DM, HTN, DLD	14	17	54	35.04	4.37	107	63.3956	NONE	NONE	NONE	NONE	NONE	0	0	0	0	0	1	1	0	0	0	1		NONE	NONE
10-10-80-00	15 mg daily	15	65	male	112	1.7	38.7543	NO	NKA	no			yes			rivaroxaban	aspirin, 81 mg, Oral, Daily	CAD, CKD, Afib, Hypothyroidism	61	283	115	26.39	8.48	405	25.3498	NONE	NONE	NONE	NONE	NONE	0	0	0	0	0	1	0	0	0	0	1		NONE	NONE
02-40-81-16	15 mg daily	15	65	male	105	1.7	36.3322	yes	NKA	no			yes	43200		rivaroxaban	aspirin, 81 mg, Oral, Daily, clopedogril 75 mg daily	DM, IHD, HTN, PCI, COPD, STEMI	13	12	73	37.8	4.56	100	96.25	NONE	NONE	NONE	NONE	NONE	0	0	0	0	0	1	0	0	0	0	1		NONE	NONE
10-12-00-28	15 mg oral daily	15	65	female	70	1.48	31.9576	NO	NKA	yes		PE	NO			rivaroviban,warfarin	aspirin 81 mg	PE,DLD,KNEE PAIN	17	16	94	35.87	8.31	68	94.3627	NONE	NONE	NONE	NONE	NONE	0	0	0	0	0	1	0	0	0	0	1		NONE	NONE
00-64-33-48	rivaroxaban 15 mg / 1 tab(s) Oral Daily	15	65	M	66	1.7	22.8374	NO	NKA	NO	NONE	NONE	NONE	NONE	NONE	RIVA	NO	AVR, SEVERE LV SYSTOLIC DYSFUNCTION , PAFIB, DM, ANEMIA	26	21	138	39.21	16.42	172	35.1744	NONE	NONE	NONE	NONE	NONE	0	0	0	0	0	0	0	0	1	0	1		NONE	NONE
00-32-55-91	rivaroxaban 15 mg / 1 tab(s) Oral Daily	15	65	F	72	1.43	35.2095	NO	NKA	Yes	2017	DVT	NONE	NONE	NONE	RIVA	ASA	DM, HTN, IHD, DVT, AFIB	35	14	99	34	12	85	77.6471	NONE	NONE	NONE	NONE	NONE	0	0	0	0	0	1	0	0	0	0	1		NONE	NONE
10-13-85-59	rivaroxaban 15 mg / 1 tab(s) Tab Oral qPM	15	65	M	115	1.7	39.7924	Yes	NKA	NO	NONE	NONE	yes	None	acute decompensated HF, reduced EF<25%, Afib	Rivaroxaban	None	HTN, Amphetamin user, HF, Afib, delirium	18	53	95	23.64	54.86	190	55.4825	None	None	None	None	None	0	0	0	0	0	1	1	0	0	1	1		NONE	NONE
00-19-88-44	rivaroxaban 15 mg/ 1 tab(s) Oral Daily	15	65	F	88	1.49	39.6379	NO	NKA	NO	NONE	NONE	NONE	NONE	NONE	RIVA	NO	BA, AR, GERD, HTN, OA, OSTEOPOROSIS, FIX PROXIMAL TIBIA, LEFT ANKLE	25	17	80	35.13	5.56	54	149.383	NONE	NONE	NONE	NONE	NONE	0	0	0	1	0	0	0	0	0	0	0		NONE	NONE
01-02-86-76	20 mg daily	20	65	female	108	1.55	44.9532	NO	NKA	yes		PROVOKED DVT	no			rivaroxaban	None	DVT, IDA, GERD	18	15	122	36.93	8.36	50	198	NONE	NONE	NONE	NONE	NONE	0	0	0	0	0	1	0	1	0	0	1		NONE	NONE
10-04-67-32	20 mg daily	20	65	male	85	1.74	28.075	NO	NKA	no			yes		Atrial flutter	rivaroxaban	aspirin, 81 mg, Oral, Daily	OSA, COPD, DM, HTN, DLD, A flutter, Sever AS S/P TAVI	10	18	143	25.87	10.74	86	90.6008	NONE	NONE	NONE	NONE	NONE	0	0	0	0	0	1	1	0	0	0	1		NONE	NONE
10-20-63-40	20 mg daily	20	65	female	75	1.62	28.578	NO	NKA	no			yes			rivaroxaban	None	DM, DLD, arrthmia	26	23	88	38.06	7.21	51	134.804	NONE	NONE	NONE	NONE	NONE	0	0	0	0	0	1	0	0	0	0	1		NONE	NONE
01-02-50-93	20 mg daily	20	65	female	82	1.574	33.0982	NO	NKA	no			yes			rivaroxaban	None	DM, IHD, AF	20	21	114	31.55	7.53	49	153.401	NONE	NONE	NONE	NONE	NONE	0	0	0	0	0	0	0	0	0	0	1		NONE	NONE
01-10-89-99	20 mg daily	20	65	female	82	1.565	33.48	NO	NKA	no			yes			rivaroxaban	None	DM, DLD, HTN, Gastritis, Afib	22	14	74	33.82	6.04	32	234.896	NONE	NONE	NONE	NONE	NONE	0	0	0	0	0	1	0	1	1	0	0		NONE	NONE
10-24-32-96	20 mg daily	20	65	male	70	1.66	25.4028	NO	NKA	no			no			rivaroxaban	None	cardiomyopathy, HF, HTN	21	13	63	33.65	16.77	95	67.5439	NONE	NONE	NONE	NONE	NONE	0	0	0	1	0	0	0	0	0	0	0		NONE	NONE
10-22-04-95	20 mg daily	20	65	female	50.3	1.58	20.149	NO	NKA	no			no			rivaroxaban	aspirin 81 mg	post MVR, tricuspid repair surgery, Mitral stenosis	16	29	93	34.86	18.62	82	56.2297	NONE	NONE	NONE	NONE	NONE	0	0	0	0	0	0	0	0	0	0	0		NONE	NONE
10-19-98-10	20 mg daily	20	65	male	80	1.6	31.25	NO	NKA	no			no			rivaroxaban	None		35	14	99	34	12	85	86.2745	NONE	NONE	NONE	NONE	NONE	0	0	0	0	0	0	0	0	0	0	0		NONE	NONE
10-06-33-99	20 mg daily	20	65	female	80.5	1.57	32.6585	NO	NKA	no			yes			rivaroxaban	None	DM, Afib, HTN	47	15	90	40.94	7.71	56	131.771	NONE	NONE	NONE	NONE	NONE	0	0	0	0	0	0	0	0	0	0	0		NONE	NONE
01-02-96-24	20 mg daily	20	65	male	88	1.75	28.7347	NO	NKA	no			yes			rivaroxaban	None	DM, HTN, AF, Bioprosthetic AVR + hemiarch ascending aorta replacement (4/2019).	22	16	149	34.33	10.92	57	141.52	NONE	NONE	NONE	NONE	NONE	0	0	0	0	0	0	0	0	0	0	0		NONE	NONE
00-90-39-60	20 mg oral daily	20	65	male	60	1.55	24.974	NO	NKA	no			no			rivaroxaban	Aspir 81, Oral, Daily, Plavix 75 mg oral tablet, Oral, Daily	HF	35	14	99	34	12	89	61.7978	NONE	NONE	NONE	NONE	NONE	0	0	0	0	0	1	1	0	1	0	0		NONE	NONE
01-18-49-17	20 mg oral daily	20	65	male	66.8	1.64	24.8364	NO	NKA	no			yes		a-fib	rivaroxiban	None	DM,A-FIB,Dilated cardiomyopathy,	191	131	154	38.67	86.29	165	37.1111	NONE	NONE	NONE	NONE	NONE	0	0	0	0	0	0	0	0	0	0	0		NONE	NONE
10-14-11-70	20 mg oral tablet, 1 tab(s), Oral, qPM	20	65	female	107	1.51	46.9278	NO	heparin	no			yes		a-fib	rivaroxiban	aspirin 81 mg	IHD,AF,HTN,-Chronic Type 2 Respiratory Failure secondary to Obesity	20	35	61	37.5	21.9	41	239.228	NONE	NONE	NONE	NONE	NONE	0	0	0	0	0	1	0	0	0	0	1		NONE	NONE
10-11-81-98	20 mg oral tablet, 1 tab(s), Oral, qPM	20	65	male	99	1.78	31.2461	NO	NKA	no			yes		atrial flutter	rivaroxiban	None	MVR,AVR,Atrail flutter	17	14	66	38.29	10.3	124	73.1855	NONE	NONE	NONE	NONE	NONE	0	0	0	0	0	1	0	0	0	0	1		NONE	NONE
10-14-03-44	20 mg oral tablet, 1 tab(s), Oral, qPM	20	65	male	57	1.65	20.9366	no	NKA	yes		SVT	no			rivaroxiban	aspirin 81 mg	PULMONARY HTN,DM,GERD,BPH	14	8	53	24.61	8.1	86	60.7558	NONE	NONE	NONE	NONE	NONE	0	0	0	0	0	1	0	0	0	0	0		NONE	NONE
10-11-84-78	20 mg oral tablet, 1 tab(s), Oral, qPM	20	65	female	82	1.58	32.8473	NO	NKA	no			yes		a-fib	rivaroxiban	None	HTN,AFIB,Non-ischemic cardiomyopathy , Moderate LV dysfunction	19	21	105	40.47	11.14	75	100.222	NONE	NONE	NONE	NONE	NONE	0	0	0	0	0	0	0	0	0	0	0		NONE	NONE
01-15-27-68	20 mg oral tablet, 20 mg, Oral, qPM	20	65	male	68.8	1.66	24.9673	NO	NKA	YES		DVT	NO			rivaroxiban	None		22	13	64	37.72	12.88	84	75.0794	NONE	NONE	NONE	NONE	NONE	0	0	0	0	0	1	1	0	0	0	0		NONE	NONE
00-90-24-63	20 mg, Oral, Daily	20	65	male	80.2	1.68	28.4155	no	NKA	no			no			rivaroxaban	None	DLD, CAD	57	20	53	30.13	6.62	84	87.5198	NONE	NONE	NONE	NONE	NONE	0	0	0	0	0	0	1	0	0	0	0		NONE	NONE
00-87-88-07	20 mg, Oral, qPM	20	65	female	70	1.48	31.9576	NO	NKA	no			yes			rivaroxaban	None	HTN, DLD, Afib	24	21	82	39	4.59	68	94.3627	NONE	NONE	NONE	NONE	NONE	0	0	0	1	0	0	0	0	0	0	0		NONE	NONE
00-07-21-96	rivaroxaban 20 mg / 1 tab(s) Oral QPM	20	65	M	106.5	1.63	40.0843	NO	NKA	NO	NONE	NONE	NONE	NONE	NONE	RIVA	ASA	T2DM ,OHA, HTN, AFIB, STROKE 5 YEARS AGO WITH MOBILITY IMPAIRMENT, VISUAL IMPAIRMENT	17	11	82	37.36	7.3	76	128.454	NONE	NONE	NONE	NONE	NONE	0	0	0	0	0	0	0	0	0	0	1		NONE	NONE
00-49-87-84	rivaroxaban 20 mg/ 1 tab(s) Oral Daily	20	65	M	116.8	1.89	32.6979	NO	NKA	NO	NONE	NONE	NONE	NONE	NONE	RIVA	NO	DM, HTN, AFIB CURRENTLY ON WARFARIN EF 55%	46	26	88	36.76	6.02	80	133.833	NONE	NONE	NONE	NONE	NONE	0	0	0	0	0	1	0	0	1	0	1		NONE	NONE
00-76-51-99	rivaroxaban 20 mg/ 1 tab(s) Oral Daily	20	65	F	105.2	1.675	37.4961	NO	NKA	NO	NONE	NONE	NONE	NONE	NONE	RIVA	ASA	HTN, DM, AFIB, DLD.	33	22	99	33.44	11.12	88	109.583	NONE	NONE	NONE	NONE	NONE	0	0	0	0	0	1	1	0	0	0	1		NONE	NONE
00-80-37-39	rivaroxaban 20 mg/ 1 tab(s) Oral Daily	20	65	F	73.45	1.52	31.791	NO	EGG CONTAINING COMPOUND, FISH, MILK PRODUCT	NO	NONE	NONE	NONE	NONE	NONE	RIVA	ASA	DM, HTN, OA, LEFT FEMUR FRACTRURE FIXATION	26	16	73	34	5.21	70	96.1845	NONE	NONE	NONE	NONE	NONE	0	0	0	0	0	1	0	0	0	0	1		NONE	NONE
00-03-00-22	rivaroxaban 20 mg/ 1 tab(s) Oral Daily	20	65	F	77.3	1.531	32.9784	NO	NKA	NO	NONE	NONE	NONE	NONE	NONE	RIVA	NO	AFIB, HTN, HYPOTHYROIDISM, DLD	22	26	82	32.71	10.8	91	77.8663	NONE	NONE	NONE	NONE	NONE	0	0	0	0	0	1	0	1	0	0	0		NONE	NONE
00-67-34-21	rivaroxaban 20 mg/ 1 tab(s) Oral Daily	20	65	F	62	1.44	29.8997	NO	NKA	NO	NONE	NONE	NONE	NONE	NONE	RIVA	ASA	PAFIB, HTN	35	14	99	34	12	85	66.8627	NONE	NONE	NONE	NONE	NONE	0	0	0	0	0	1	0	0	0	0	0		NONE	NONE
00-35-56-47	rivaroxaban 20 mg/ 1 tab(s) Oral Daily	20	65	M	76	1.675	27.0884	NO	NKA	NO	NONE	NONE	NONE	NONE	NONE	RIVA	NO	AFIB, CVA, VALVULAR HEART DISEASE, ECZEMA, MVR BIOPROSTHETIC	22	18	152	32.22	13.35	125	55.7333	NONE	NONE	NONE	NONE	NONE	0	0	0	0	0	0	0	0	0	0	0		NONE	NONE
00-72-18-82	rivaroxaban 20 mg/ 1 tab(s) Oral Daily	20	65	M	74	1.74	24.4418	NO	NKA	NO	NONE	NONE	NONE	NONE	NONE	RIVA	NO	HIV, AFIB	35	14	99	34	12	85	79.8039	NONE	NONE	NONE	NONE	NONE	0	0	0	0	0	0	0	0	0	0	0		NONE	NONE
00-47-05-69	rivaroxaban 20 mg/ 1 tab(s) Oral Daily	20	65	F	47	1.65	17.2635	NO	NKA	Yes	?	DVT	NONE	NONE	NONE	RIVA	NO	EUTHYROID GOITER, COLON CA, LIVER SEGMENT RESECTION , DVT, POST SLEEVE BARIATRIC SURGERY	35	14	99	34	12	85	50.6863	NONE	NONE	NONE	NONE	NONE	0	0	0	0	0	0	0	0	0	0	0		NONE	NONE
02-29-93-88	10 mg daily	10	66	female	111.6	1.6	43.5937	NO	NKA	yes	13/11/2018	Unprovoked DVT	no			rivaroxaban	aspirin, 81 mg, Oral, Daily	DLD, DM, hypothyrodism, CKD, obesity	10.7	9	114	39.5	4.4	187	53.9765	NONE	NONE	NONE	NONE	NONE	0	0	0	0	0	1	1	1	0	0	1		NONE	NONE
00-93-27-28	10 mg daily	10	66	famale	66	1.52	28.5665	NO	NKA	no			no			Rivaroxaban	asprin, 81 mg, Oral, Daily	left KRT , DM ,Dyslipidaemia ,HTN	66	64	211	26.39	9.5	59	101.175	NONE	NONE	NONE	NONE	NONE	0	0	0	0	0	1	0	0	0	0	1		NONE	NONE
10-18-95-40	10 mg daily	10	66	female	90.25	1.47	41.765	NO	NKA	no			no			rivaroxaban	None	DM, HTN, TKR	19	86	132	20.69	8.42	89	91.7147	NONE	NONE	NONE	NONE	NONE	0	0	0	0	0	1	0	0	0	0	1		NONE	NONE
10-07-99-34	10 mg daily	10	66	male	77.7	1.72	26.2642	NO	NKA	no			no			rivaroxaban	None	DM, Osteoarthritis of knee	12	17	65	23.76	15.03	54	130.14	NONE	NONE	NONE	NONE	NONE	0	0	0	0	0	0	0	1	0	0	0		NONE	NONE
01-19-29-02	10 mg daily	10	66	female	67	1.49	30.1788	NO	NKA	yes	42776	left femoral & popliteal DVT	no			rivaroxaban	aspirin, 81 mg, Oral, Daily	DVT, DM, HTN, RA	24	12	82	34	3.82	62	97.7384	NONE	NONE	NONE	NONE	NONE	0	0	0	0	0	0	0	0	0	0	0		NONE	NONE
10-18-63-42	10 mg daily	10	66	male	80	1.6	31.25	NO	NKA	no			no			rivaroxaban	None	PVD	35	14	99	34	12	85	85.1242	NONE	NONE	NONE	NONE	NONE	0	0	0	0	0	0	0	0	0	0	0		NONE	NONE
00-86-82-85	10 MG DAILY	10	66	male	79	1.677	28.0906	NO	NKA	no			no			rivaroxaban	None	blind, DM, HTN, IHD	28	34	104	26.61	21.64	70	102.073	NONE	NONE	NONE	NONE	NONE	0	0	0	0	0	1	0	0	0	0	1		NONE	NONE
00-04-02-21	rivaroxaban 10 mg/ 1 tab(s) Oral Daily	10	66	F	62	1.46	29.0861	NO	NKA	NO	NONE	NONE	NONE	NONE	NONE	RIVA	NO	TKR, HTN, DLD, DM, CKD STAGE 2	19	15	90	32.53	8.24	103	54.4423	NONE	NONE	NONE	NONE	NONE	0	0	0	0	0	1	1	1	0	0	1		NONE	NONE
00-82-13-36	rivaroxaban 10 mg/ 1 tab(s) Oral Daily	10	66	F	70	1.58	28.0404	NO	PENICILLIN	NO	NONE	NONE	NONE	NONE	NONE	RIVA	ASA	TKR, DM ,HTN, DLD, HYPOTHYROID	26	14	139	38.35	10.27	48	131.898	NONE	NONE	NONE	NONE	NONE	0	0	0	0	0	1	0	1	0	0	1		NONE	NONE
00-40-27-71	rivaroxaban 10 mg/ 1 tab(s) Oral Daily	10	66	M	79	1.72	26.7036	NO	NKA	NO	NONE	NONE	NONE	NONE	NONE	RIVA	ASA	DM, HTN, DLD, HYPOTHYROIDISM, SUPERIOR MESENTERIC VEIN THROMBOSIS 19 YEARS AGO	25	18	94	36.92	12.6	78	91.604	NONE	NONE	NONE	NONE	NONE	0	0	0	0	0	0	0	1	0	0	1		NONE	NONE
00-05-17-30	rivaroxaban 10 mg/ 1 tab(s) Oral Daily	10	66	F	65	1.65	23.8751	NO	NKA	Yes	?	PE	NONE	NONE	NONE	RIVA	ASA	DM, HTN, OSA/OHS ON BIPAP AT NIGHT, PE	29	14	71	30.1	14.25	43	136.718	NONE	NONE	NONE	NONE	NONE	0	0	0	0	0	0	0	0	0	0	1		NONE	NONE
00-62-54-12	rivaroxaban 10 mg/ 1 tab(s) Oral Daily	10	66	M	97	1.445	46.4554	NO	NKA	NO	NONE	NONE	NONE	NONE	NONE	RIVA	NO	HX OF PREVIOUS DVT, ON WARFARIN, BA, OBESITY, GOUT, HTN, DLD, IHD, OSA, BPH, KHYSCOLIOSIS	21	19	74	35.54	7.24	119	73.7236	NONE	NONE	NONE	NONE	NONE	0	0	0	0	0	1	1	0	0	0	0		NONE	NONE
00-01-38-30	rivaroxaban 10 mg/ 1 tab(s) Oral Daily	10	66	M	62	1.53	26.4855	NO	NKA	NO	NONE	NONE	NONE	NONE	NONE	RIVA	NO	TKR, HTN,	21	24	104	40.59	7.65	91	61.6215	NONE	NONE	NONE	NONE	NONE	0	0	0	0	0	1	0	0	0	0	0		NONE	NONE
00-38-50-59	rivaroxaban 10 mg/ 1 tab(s) Oral Daily	10	66	F	76	1.5	33.7778	NO	NKA	Yes	OLD	DVT	NONE	NONE	NONE	RIVA	NO	BA, NEUROGENIC BLADDER, OLD DVT ON RIVA AS PROPHYLAXIS, GERD, HTN, OSTEOPOROSIS, PARAPLEGIC 2RY TO SCHWANNOMA S/P SURGERY, BED RIDDEN	13	9	43	30.04	3.33	28	245.492	NONE	NONE	NONE	NONE	NONE	0	0	0	0	0	1	0	0	0	0	0		NONE	NONE
00-52-13-49	rivaroxaban 10 mg/ 1 tab(s) Oral Daily	10	66	F	155	1.55	64.5161	NO	NKA	NO	NONE	NONE	NONE	NONE	NONE	RIVA	NO	DVT	27	14	63	34.64	2.83	62	226.111	NONE	NONE	NONE	NONE	NONE	0	0	0	0	0	0	0	0	0	0	0		NONE	NONE
00-35-48-45	rivaroxaban 10 mg/ 1 tab(s) Oral Daily	10	66	M	117	1.65	42.9752	yes	NKA	NO	NONE	NONE	NONE	NONE	NONE	RIVA	NO	ASTHMA, TKR	35	14	99	34	12	85	124.494	NONE	NONE	NONE	NONE	NONE	0	0	0	0	0	0	0	0	0	0	0		NONE	NONE
02-42-58-78	15 mg daily	15	66	female	111	1.63	41.778	NO	NKA	no			yes			rivaroxaban	None	DM, Afib, HTN, HFPEF	14	22	207	26.86	12.69	126	79.6772	NONE	NONE	NONE	NONE	NONE	0	0	0	0	0	0	0	0	0	1	1		NONE	NONE
02-23-36-61	15 mg daily	15	66	female	101	1.53	43.1458	NO	NKA	no			yes			rivaroxaban	None	DM, HTN, DLD. CKD, Afib, asthma, HYPOTHYROIDISM, obesity	35	14	99	34	12	120	76.1241	NONE	NONE	NONE	NONE	NONE	0	0	0	0	0	1	1	1	0	0	1		NONE	NONE
10-08-07-92	15 mg daily	15	66	male	71.8	1.675	25.5914	NO	NKA	no			yes			rivaroxaban	aspirin, 81 mg, Oral, Daily	DM, HTN, Afib, PCI to LAD and RCA, recath	33	29	103	23.15	15.19	124	52.3703	NONE	NONE	NONE	NONE	NONE	0	0	0	0	0	0	0	0	0	0	1		NONE	NONE
10-10-87-29	15 mg daily	15	66	male	88.9	1.61	34.2965	NO	NKA	yes		Lt LL DVT	yes			rivaroxaban	aspirin, 81 mg, Oral, Daily	DM, IHD, HF, Afib, DVT, BA, DLD, CKD, Hypothyroidism	13	15	102	33.41	9.96	104	77.3126	NONE	NONE	NONE	NONE	NONE	0	0	0	0	0	0	0	0	0	1	0		NONE	NONE
10-22-14-27	15 mg daily	15	66	male	55	1.69	19.257	NO	NKA	no			yes			rivaroxaban	None	BPH, Afib, DCMP EF 15-20%, cardiomyopathy	20	14	87	33.32	7.84	108	46.0597	NONE	NONE	NONE	NONE	NONE	0	0	0	0	0	0	0	0	0	1	0		NONE	NONE
10-13-06-26	15 mg oral daily	15	66	female	61	1.51	26.7532	NO	NKA	no			no			rivaroxiban	None	IHD post CABG ,T2DM,HTN,DLD	21	15	240	26.49	10.5	72	76.6265	NONE	NONE	NONE	NONE	NONE	0	0	0	0	0	1	0	0	0	0	1		NONE	NONE
10-13-26-93	15 mg oral daily	15	66	female	84	1.55	34.9636	NO	NKA	no			yes		a-fib	rivaroxiban	None	DM,HTN,HYPOTHYRODSIM	25	46	443	23.07	20.35	56	135.667	NONE	NONE	NONE	NONE	NONE	0	0	0	0	0	1	0	0	0	0	0		NONE	NONE
01-16-53-97	15 mg qpm fo 25 days	15	66	female	87.5	1.57	35.4984	NO	fish,shrimp	no			no			rivaroxiban	None	TKR	24	16	84	36.43	5.66	49	161.508	NONE	NONE	NONE	NONE	NONE	0	0	0	0	0	1	0	0	0	0	1		NONE	NONE
10-13-85-59	15mg oral qpm	15	66	male	90	1.68	31.8878	yes	NKA	no			yes		a-fib	rivaroxiban	None	DCMP,HTN,AFIB,HF	17	23	112	23.79	10.77	101	80.5941	NONE	NONE	NONE	NONE	NONE	0	0	0	0	0	0	0	0	0	0	1		NONE	NONE
00-56-19-47	rivaroxaban 15 mg / 1 tab(s) Oral Daily	15	66	M	83	1.76	26.7949	NO	NKA	NO	NONE	NONE	NONE	NONE	NONE	RIVA	ASA	DM, HTN, BA, RECENT ANTERIOR AND INFERIOR PCI, HFREF, DIABETIC NEPHROPATHY, DIABETIC RETINOPATHY, ASTHMA	37	30	169	24.89	12.65	174	43.143	NONE	NONE	NONE	NONE	NONE	0	0	0	0	0	1	0	0	1	0	1		NONE	NONE
00-35-66-18	rivaroxaban 15 mg / 1 tab(s) Oral Daily	15	66	F	90	1.631	33.8325	NO	NKA	NO	NONE	NONE	NONE	NONE	NONE	RIVA	NO	DM, HTN, BA , DLD, VALVULAR HEART DISEASE.	35	14	99	34	12	85	95.7647	NONE	NONE	NONE	NONE	NONE	0	0	0	0	0	1	1	0	0	0	1		NONE	NONE
00-23-36-30	rivaroxaban 15 mg / 1 tab(s) Oral Daily	15	66	F	97.1	1.5	43.1556	NO	NKA	NO	NONE	NONE	NONE	NONE	NONE	RIVA	NO	DM, HTN, AFIB, COPD, OSA, DEPRESSION,	35	14	99	34	12	85	103.319	NONE	NONE	NONE	NONE	NONE	0	0	0	0	0	1	0	0	0	0	1		NONE	NONE
00-11-31-67	rivaroxaban 15 mg / 1 tab(s) Oral Daily	15	66	F	78	1.5	34.6667	NO	IV CONTRAST DOTAREM	NO	NONE	NONE	NONE	NONE	NONE	RIVA	NO	NOT CLEAR , CAME TO ER COMPL. OF 5 DAYS COUGH, PATIENT USING RIVA.	35	14	99	34	12	85	82.9961	NONE	NONE	NONE	NONE	NONE	0	0	0	0	0	0	0	0	0	0	0		NONE	NONE
01-14-54-46	20 mg, Oral, Daily	20	66	female	95	1.65	34.8944	no	NKA	NO			YES		A-fib	rivaroxiban	None		20	18	36.62	91	5.91	63	136.384	NONE	NONE	NONE	NONE	NONE	0	0	0	0	0	1	0	0	0	0	1		NONE	NONE
10-21-84-42	20 mg daily	20	66	female	100	1.6	39.0625	NO	NKA	no			no			rivaroxaban	None	HTN, DM, HF, dilated cardiomyopathy, bilateral LL resting pain with inability to walk	16	23	60	26.46	4.99	95	95.2047	NONE	NONE	NONE	NONE	NONE	0	0	0	0	0	1	0	0	0	1	1		NONE	NONE
01-13-87-84	20 mg daily	20	66	female	75	1.5	33.3333	no	NKA	no			yes			rivaroxaban	None	DM, asthma, Mastectomy, Afib	21	19	122	27.29	5.86	93	72.9391	NONE	NONE	NONE	NONE	NONE	0	0	0	0	0	1	0	0	0	0	1		NONE	NONE
10-07-68-18	20 mg daily	20	66	female	156	1.6	60.9375	NO	NKA	no			yes			rivaroxaban	None	DM, DLD, HTN, HFpEF, IHD, Afib, obesity	24	15	109	37.41	14.93	54	261.284	NONE	NONE	NONE	NONE	NONE	0	0	0	0	0	1	1	0	0	0	0		NONE	NONE
10-05-59-69	20 mg daily	20	66	female	134.5	1.59	53.202	NO	NKA	no			no			rivaroxaban	None	DM, OA, HTN, GERD, DLD, Polyneuropathy, SPINAL CANAL STENOSIS	9.5	12.3	124	37.6	11.4	51	238.525	NONE	NONE	NONE	NONE	NONE	0	0	0	0	0	0	0	0	0	0	0		NONE	NONE
01-14-17-61	20 mg daily	20	66	male	98	1.69	34.3125	no	NKA	no			yes		A-fib	rivaroxaban	None	HF, acidosis	70	33	79	38.98	8.01	89	99.5905	NONE	NONE	NONE	NONE	NONE	0	0	0	0	0	0	0	0	0	0	0		NONE	NONE
10-13-76-05	20 mg oral tablet, 1 tab(s), Oral, qPM	20	66	female	70	1.6	27.3437	NO	NKA	no			yes		a-fib	rivaroxiban	None	HTN,DM,OLD CVA,AFIB,CKD	882	14	99	21.5	30.46	107	59.1693	NONE	NONE	NONE	NONE	NONE	0	0	0	0	0	0	0	0	0	1	1		NONE	NONE
10-11-45-79	20 mg oral tablet, 1 tab(s), Oral, qPM	20	66	female	70	1.6	27.3437	NO	NKA	no			yes		A-fib	rivaroxiban	None	DM,HTN ,CVA,A-FIB	38	40	240	32.61	10.03	34	186.209	NONE	NONE	NONE	NONE	NONE	0	0	0	0	0	0	1	0	0	0	0		NONE	NONE
00-95-57-09	20 mg, Oral, Daily	20	66	female	154.2	1.6	60.2344	NO	NKA	no			no			rivaroxaban	None	IHD, DM, DLP, HTN, hypothyrodism, Hyperuricaemia	23	17	63	35.37	8.52	49	284.623	NONE	NONE	NONE	NONE	NONE	0	0	0	0	0	0	0	0	0	1	0		NONE	NONE
00-30-48-42	rivaroxaban 20 Mg Oral Daily	20	66	F	80.3	1.568	32.6605	NO	ESOMEPRAZOLE	NO	NONE	NONE	NONE	NONE	NONE	RIVA	NO	PERSISTANT A FIB, BREAST CA, CHADSVASC SCORE 1, MODERATE MR	17	14	50	30.94	4.29	60	121.045	NONE	NONE	NONE	YES, SCORE 1	NONE	0	0	0	0	0	0	0	0	0	0	0		NONE	NONE
00-36-13-53	rivaroxaban 20 mg/ 1 tab(s) Oral Daily	20	66	M	156	1.62	59.4422	NO	NKA	NO	NONE	NONE	yes	None	AFIB	Rivaroxaban	None	T2DM, HTN, A.FIB, HYPERCHOLESTREMIA, ANEMIA, BRONCHIACTESIS, RF type II	35	14	99	34	12	108	130.642	None	None	None	None	None	0	0	0	0	0	0	1	0	1	1	1		NONE	NONE
00-56-22-81	rivaroxaban 20 mg/ 1 tab(s) Oral Daily	20	66	F	93	1.47	43.0376	NO	NKA	NO	NONE	NONE	NONE	NONE	NONE	RIVA	NO	HODGKIN LYMPHOMA, DM, HTN, AFIB, HF	39	24	188	35.54	9.45	140	60.081	NONE	NONE	NONE	NONE	NONE	0	0	0	0	0	1	0	0	1	0	1		NONE	NONE
00-53-11-30	rivaroxaban 20 mg/ 1 tab(s) Oral Daily	20	66	M	71	1.677	25.246	NO	NKA	NO	NONE	NONE	NONE	NONE	NONE	RIVA	NO	DM, HTN, DLD, IHD	29	16	53	39.32	10.63	73	87.9665	NONE	NONE	NONE	NONE	NONE	0	0	0	0	0	1	1	0	0	0	1		NONE	NONE
00-55-10-13	rivaroxaban 20 mg/ 1 tab(s) Oral Daily	20	66	M	68	1.71	23.255	NO	NKA	NO	NONE	NONE	NONE	NONE	NONE	RIVA	NO	DM, DLD, AFIB, LEURAL EFFUSION,	32	22	56	32.53	18	121	50.8283	NONE	NONE	NONE	NONE	NONE	0	0	0	0	0	1	1	0	0	0	1		NONE	NONE
00-28-33-42	rivaroxaban 20 mg/ 1 tab(s) Oral Daily	20	66	M	70	1.7	24.2215	NO	NKA	NO	NONE	NONE	NONE	NONE	NONE	RIVA	NO	DM, HTN, DLD, AFIB WITH RAPID VENTICULAR RESPONSE,	28	17	89	35.12	9.28	56	113.056	NONE	NONE	NONE	NONE	NONE	0	0	0	0	0	0	1	0	0	0	1		NONE	NONE
00-11-52-13	rivaroxaban 20 mg/ 1 tab(s) Oral Daily	20	66	F	77	1.53	32.8933	NO	NKA	NO	NONE	NONE	NONE	NONE	NONE	RIVA	ASA	DM, HTN OSTEOPOROSIS, AFIB	23	14	99	32.5	6.78	40	174.106	NONE	NONE	NONE	NONE	NONE	0	0	0	0	0	1	0	0	0	0	1		NONE	NONE
00-21-76-60	rivaroxaban 20 mg/ 1 tab(s) Oral Daily	20	66	M	90	1.73	30.0712	NO	KIWI, PENICILLIN	Yes	2018	PROVOKED PE	NONE	NONE	NONE	RIVA	ASA	DM, HTN, BPH, PALPITATION, PROVOKED RIGHT SEGMENT PE	23	14	105	35.14	4.97	84	96.9048	NONE	NONE	NONE	NONE	NONE	0	0	0	0	0	1	0	0	0	0	1		NONE	NONE
00-13-47-22	rivaroxaban 20 mg/ 1 tab(s) Oral Daily	20	66	F	91	1.45	43.2818	NO	NKA	NO	NONE	NONE	NONE	NONE	NONE	RIVA	NO	HTN, DM, CARDIAC DISEASE	35	14	99	34	12	85	96.8288	NONE	NONE	NONE	NONE	NONE	0	0	0	0	0	1	0	0	0	0	1		NONE	NONE
00-23-61-18	rivaroxaban 20 mg/ 1 tab(s) Oral Daily	20	66	M	81	1.65	29.7521	NO	NKA	NO	NONE	NONE	NONE	NONE	NONE	RIVA	NO	T2DM, HTN, CAD, AFIB,	35	14	99	34	12	85	86.1882	NONE	NONE	NONE	NONE	NONE	0	0	0	0	0	1	0	0	0	0	1		NONE	NONE
00-05-78-30	rivaroxaban 20 mg/ 1 tab(s) Oral Daily	20	66	F	80	1.6	31.25	NO	NKA	NO	NONE	NONE	NONE	NONE	NONE	RIVA	ASA	PATIENT RECEIVED RIVA ON 2015 WITHOUT CLEAR INDICATION NOR NOTES IN HER FILE, CURRENTLY ON ASA , HTN, DM, METASTATIC COLON CANCER	11	14	76	34.9	3.36	71	101.909	NONE	NONE	NONE	NONE	NONE	0	0	0	0	0	0	0	0	0	0	1		NONE	NONE
00-73-64-40	rivaroxaban 20 mg/ 1 tab(s) Oral Daily	20	66	M	68.5	1.68	24.2701	YES	NKA	NO	NONE	NONE	NONE	NONE	NONE	RIVA	ASA	BRONCHIACTASIS, A-ORTIC VALCE INSUFFECIENCY, AFIB, SEVERE LV SYSTOLIC DYSFUNCTION, AND RV SYSTOLIC DYSFUNCTION	27	23	112	39.87	10.28	144	43.0239	NONE	NONE	NONE	NONE	NONE	0	0	0	0	0	1	0	0	1	0	0		NONE	NONE
00-24-18-22	rivaroxaban 20 mg/ 1 tab(s) Oral Daily	20	66	F	80.7	1.71	27.5982	NO	NKA	NO	NONE	NONE	NONE	NONE	NONE	RIVA	NO	DLD, HTN, ARRYTHMIA, PAROX. AFIB, ECZEMA	18	20	100	35.56	8.33	109	66.9621	NONE	NONE	NONE	NONE	NONE	0	0	0	0	0	1	1	0	0	0	0		NONE	NONE
00-73-06-79	rivaroxaban 20 mg/ 1 tab(s) Oral Daily	20	66	F	67.8	1.462	31.7201	NO	NKA	NO	NONE	NONE	NONE	NONE	NONE	RIVA	NO	AFIB, ANEMIA, BA, DLD, GASTERITIS, HTN	20	16	108	35.68	6.85	87	70.4843	NONE	NONE	NONE	NONE	NONE	0	0	0	0	0	1	1	0	0	0	0		NONE	NONE
00-05-34-76	rivaroxaban 20 mg/ 1 tab(s) Oral Daily	20	66	F	88	1.51	38.5948	NO	NKA	NO	NONE	NONE	NONE	NONE	NONE	RIVA	NO	DM, HTN, DLD, AFIB, IHD	26	20	96	33.87	7	49	162.431	NONE	NONE	NONE	NONE	NONE	0	0	0	0	1	0	0	0	0	0	0		NONE	NONE
00-21-33-82	rivaroxaban 20 mg/ 1 tab(s) Oral Daily	20	66	M	80	1.6	31.25	NO	NKA	Yes	2015	PE	NONE	NONE	NONE	RIVA	NO	PE	35	14	99	34	12	85	85.1242	NONE	NONE	NONE	NONE	NONE	0	0	0	0	0	0	0	0	0	0	0		NONE	NONE
00-72-99-57	rivaroxaban15MG BID THEN 20 mg/ 1 tab(s) Oral Daily	20	66	F	43.5	1.46	20.4072	NO	NKA	NO	NONE	NONE	NONE	NONE	NONE	RIVA	ASA	DVT AFTER OPERATION IN 2017, NOT RIVA CURRENTLY	35	14	99	34	12	85	46.2863	NONE	NONE	NONE	NONE	NONE	0	0	0	0	0	0	0	0	0	0	0		NONE	NONE
00-90-17-58	15 mg oral tablet, 15 mg, 1 tab(s), Oral, BID	30	66	male	65	1.6	25.3906	NO	NKA	no			no			rivaroxaban	None	Metastatic rectal cancer post resection and colostomy creation, Liver Metastases and resection, Rectovesical fistula, Hypothyroidism	4	30	109	23.7	18.59	41	143.388	NONE	NONE	NONE	NONE	NONE	0	0	0	0	0	0	0	1	0	0	0		NONE	NONE
10-19-19-05	10 mg daily	10	67	female	55	1.51	24.1217	NO	NKA	no			no			rivaroxaban	None	TKR, DM, HTN, osteoporosis	21	25	227	22.35	4.02	33	148.704	NONE	NONE	NONE	NONE	NONE	0	0	0	0	0	1	0	0	0	0	1		NONE	NONE
10-19-38-83	10 mg daily	10	67	female	81.2	1.61	31.326	NO	NKA	no			no			rivaroxaban	None	HTN, DM, Osteoarthritis of knee	19	16	60	23.99	9.72	41	176.704	NONE	NONE	NONE	NONE	NONE	0	0	0	0	0	1	0	0	0	0	1		NONE	NONE
10-17-00-94	10 mg daily	10	67	female	70	1.52	30.2978	NO	NKA	no			no			rivaroxiban	None	TKR, HTN, DM	29	30	99	29.81	9.46	58	107.682	NONE	NONE	NONE	NONE	NONE	0	0	0	0	0	1	0	0	0	0	1		NONE	NONE
10-19-04-93	10 mg daily	10	67	male	61.5	1.64	22.8659	yes	NKA	yes	43344	PE	no			rivaroxaban	None	HepB, PE, DM, HTN, Granulomatosis with polyangiitis,Kaposi sarcome biopsy	21	9	90	25.84	5.01	69	79.5242	NONE	NONE	NONE	NONE	NONE	0	0	0	0	0	1	0	0	0	0	1		NONE	NONE
10-04-50-68	10 mg daily	10	67	female	114	1.58	45.6658	NO	NKA	no			no			rivaroxaban	None	left ankle posterior pain, DM	33	24	84	33	2.72	96	105.951	NONE	NONE	NONE	NONE	NONE	0	0	0	0	0	1	0	0	0	0	0		NONE	NONE
10-20-64-56	10 mg daily	10	67	female	30.3	1.43	14.8174	NO	NKA	no			no			rivaroxaban	None	HTN, neck of femur fracture	36	30	78	24.39	13.62	45	60.0763	NONE	NONE	NONE	NONE	NONE	0	0	0	0	0	1	0	0	0	0	0		NONE	NONE
10-23-59-78	10 mg daily	10	67	female	90.7	1.48	41.408	NO	NKA	no			no			rivaroxaban	None	TKR,	14	12	56	29.65	10.18	43	188.197	NONE	NONE	NONE	NONE	NONE	0	0	0	0	0	0	0	0	0	0	0		NONE	NONE
00-09-17-66	rivaroxaban 10 mg Oral Daily	10	67	F	93.1	1.58	37.2937	NO	NKA	NO	NONE	NONE	NONE	NONE	NONE	RIVA	ASA	DEPRESSION, DM, DYSLIPIDEMIA, HTN, OA, OSTEOPENIA,	14	16	129	34.24	4.36	97	85.6349	NONE	NONE	NONE	NONE	NONE	0	0	0	0	0	1	0	0	0	0	1		NONE	NONE
00-68-89-42	rivaroxaban 10 mg/ 1 tab(s) Oral Daily	10	67	M	77	1.62	29.34	NO	NKA	NO	NONE	NONE	NONE	NONE	NONE	RIVA	ASA	ESRD, HTN, DM, DLD, FEMORAL THROMBECTOMY FOR ACUTE LT. LOWER LIMB ISCHEMIA	35	14	99	34	12	85	80.8248	NONE	NONE	NONE	NONE	NONE	0	0	0	0	0	1	1	1	0	0	1		NONE	NONE
00-59-90-98	rivaroxaban 10 mg/ 1 tab(s) Oral Daily	10	67	M	67	1.605	26.0091	NO	NKA	NO	NONE	NONE	NONE	NONE	NONE	RIVA	NO	DM, HTN, DLD, TOTAL THYROIDECTOMY, THROMBOPHILIA	27	61	594	13.14	29.72	66	90.5741	NONE	NONE	NONE	NONE	NONE	0	0	0	0	0	1	1	0	0	0	1		NONE	NONE
00-26-33-45	rivaroxaban 10 mg/ 1 tab(s) Oral Daily	10	67	F	79	1.54	33.3108	NO	NKA	Yes	?	PE	NONE	NONE	NONE	RIVA	ASA	APS, CHRONIC PORTAL VEIN THROMBOSIS., HYPOTHYROIDISM	23	21	60	42.68	14.63	49	143.848	NONE	NONE	NONE	NONE	NONE	0	0	0	0	0	1	1	0	0	0	0		NONE	NONE
00-02-02-62	rivaroxaban 10 mg/ 1 tab(s) Oral Daily	10	67	F	79.5	1.53	33.9613	NO	NKA	NO	NONE	NONE	NONE	NONE	NONE	RIVA	NO	TKR,	25	18	73	40.3	3.39	60	118.219	NONE	NONE	NONE	NONE	NONE	0	0	0	0	0	0	0	0	0	0	0		NONE	NONE
10-20-86-85	15 mg daily	15	67	male	70	1.74	23.1206	NO	NKA	no			yes			rivaroxaban	None	CEREBLLAR STROKE, Afib	28	19	69	38.64	12.33	90	69.3951	NONE	NONE	NONE	NONE	NONE	0	0	0	0	0	0	0	0	0	0	0		NONE	NONE
10-13-50-14	15 mg oral daily	15	67	male	78.5	1.78	24.7759	NO	NKA	no			no			rivatoxaban	None		18	9	121	34.1	13.15	128	54.7183	NONE	NONE	NONE	NONE	NONE	0	0	0	0	0	0	0	0	0	1	1		NONE	NONE
10-13-92-43	15 mg oral daily	15	67	male	60	1.73	20.0474	no	NKA	no			no			rivaroxiban	aspirin 81 mg	Mini mitral/tricuspid valve repair,	62	62	191	29.5	29.79	78	68.6325	NONE	NONE	NONE	NONE	NONE	0	0	0	0	0	1	0	0	0	1	0		NONE	NONE
10-11-40-37	15 mg orally qpm	15	67	male	102	1.66	37.0155	NO	NKA	yes		hepatic vein thrombus	no			rivaroxiban	None	DLD,BPH	336	163	104	27.44	11	213	42.7261	NONE	NONE	NONE	NONE	NONE	0	0	0	0	0	1	1	0	0	0	1		NONE	NONE
10-16-79-93	rivaroxaban 15 mg / 1 tab(s) NG Tube Daily	15	67	F	65	1.55	27.0552	NO	NKA	NO	NONE	NONE	None	None	None	Rivaroxaban	None	HTN,Dyslipidemia, Alzheimer, Epilepsy, Afib.	12	22	133	18.97	5.76	54	107.397	None	None	None	None	None	0	0	0	0	0	1	0	0	1	1	1		NONE	NONE
00-52-32-65	rivaroxaban 15 mg / 1 tab(s) Oral Daily	15	67	F	81.5	1.52	35.2753	NO	NKA	NO	NONE	NONE	NONE	NONE	NONE	RIVA	ASA	T2DM, HTN, DLD, AFIB, IHD,	22	17	50	33.37	5.68	107	67.959	NONE	NONE	NONE	NONE	NONE	0	0	0	0	0	1	1	0	0	0	1		NONE	NONE
00-64-50-07	rivaroxaban 15 mg / 1 tab(s) Oral Daily	15	67	F	70	1.62	26.6728	NO	FISH	NO	NONE	NONE	NONE	NONE	NONE	RIVA	NO	AFIB, BA, HTN,	34	23	59	26.48	18.61	83	75.2477	NONE	NONE	NONE	NONE	NONE	0	0	0	0	0	1	0	0	0	0	0		NONE	NONE
00-13-08-11	rivaroxaban 15 mg / 1 tab(s) Oral Daily	15	67	F	67	1.588	26.5689	NO	BANANA, ONION	NO	NONE	NONE	NONE	NONE	NONE	RIVA	NO	OSTEOPOROSIS, RA SEROPOSITIVE ON METHOTREXATE, RHD, AFIB ON WARFARIN	18	20	92	35	8.1	45	132.842	NONE	NONE	NONE	NONE	NONE	0	0	0	0	0	0	0	0	0	0	0		NONE	NONE
00-76-54-66	rivaroxaban 15 mg/ 1 tab(s) Oral Daily	15	67	F	99	1.54	41.744	NO	NKA	NO	NONE	NONE	NONE	NONE	NONE	RIVA	ASA	T2DM, HTN, DLD, DEPRESSION, IHD, PAROXY.AFIB	35	14	99	34	12	85	103.918	NONE	NONE	NONE	NONE	NONE	0	0	0	0	0	1	1	0	0	0	1		NONE	NONE
10-16-91-66	20 mg daily	20	67	male	75	1.7	25.9516	NO	NKA	no			yes			rivaroxiban	None	Afib, DM, DILATED CARDIOMYOPATHY, MILD SYMPTOMS OF HF	30	23	71	29.43	24.91	92	72.7355	NONE	NONE	NONE	NONE	NONE	0	0	0	0	0	1	0	0	1	0	1		NONE	NONE
10-17-52-99	20 mg daily	20	67	female	80	1.6	31.25	NO	NKA	no			yes			rivaroxaban	None	CARDIAC ARRHYTHMIA, DM, HTN, BLURRED VA OU	31	16	93	35.52	7.4	63	113.298	NONE	NONE	NONE	NONE	NONE	0	0	0	0	0	1	0	0	0	0	1		NONE	NONE
10-21-37-44	20 mg daily	20	67	female	66	1.5	29.3333	NO	NKA	no			yes			rivaroxaban	None	DM, HTN, IHD, CABG, AF, hyperthyroidism	51	28	91	40.96	9.99	124	47.4892	NONE	1.08	NONE	NONE	NONE	0	0	0	0	0	1	0	0	0	0	1		NONE	NONE
10-01-15-65	20 mg daily	20	67	male	115.8	1.79	36.1412	NO	NKA	no			yes		PAF	rivaroxaban	Plavix, 75 mg, Oral, Daily, aspirin, 81 mg, Oral, Daily	HTN, IHD, PAF, Syncope attack, unstable angina	23	18	65	33	7.99	117	88.3071	NONE	NONE	NONE	NONE	NONE	0	0	0	0	0	1	0	0	0	0	1		NONE	NONE
02-35-41-87	20 mg daily	20	67	male	66	1.65	24.2424	NO	NKA	no			no			rivaroxaban	None	DM, POST PROATATECTEMY, LEG PAIN OFF AND ON	35	14	99	34	12	207	28.4477	NONE	NONE	NONE	NONE	NONE	0	0	0	0	0	0	0	0	0	0	1		NONE	NONE
10-09-41-31	20 mg daily	20	67	male	42	1.56	17.2584	NO	NKA	no			yes		PAF	rivaroxaban	None	CKD, DM, HTN, CABG, IHD, AS s/p valve replacement, Ischemic stroke, PAF	10.2	14.3	60	41.4	3.6	398	9.41541	NONE	NONE	NONE	NONE	NONE	0	0	0	0	0	0	0	0	0	0	1		NONE	NONE
10-04-65-39	20 mg daily	20	67	male	99	1.88	28.0104	NO	NKA	no			yes		Atrial flutter	rivaroxaban	None	DM, HTN, hypercholesterolimia, AF	40	19	105	35	8.69	70	126.186	NONE	NONE	NONE	NONE	NONE	0	0	0	0	0	1	0	1	0	0	0		NONE	NONE
10-01-34-13	20 mg daily	20	67	male	80	1.6	31.25	NO	NKA	no			None			rivaroxaban	aspirin, 81 mg, Oral, Daily		24	19	158	40	10.38	83	85.9973	NONE	NONE	NONE	NONE	NONE	0	0	0	0	0	1	0	0	0	0	0		NONE	NONE
10-18-30-02	20 mg daily	20	67	male	123	1.755	39.9347	no	NKA	no			yes			rivaroxaban	None	IHD, Afib, HTN, LVOT obstruction	26	16	74	0	12.14	104	105.522	NONE	NONE	NONE	NONE	NONE	0	0	0	0	0	1	0	0	0	0	0		NONE	NONE
10-14-45-88	20 mg oral daily	20	67	male	66	1.69	23.1084	no	NKA	no			no			rivatoxaban	None		20	19	182	35.8	12.89	92	64.0072	NONE	NONE	NONE	NONE	NONE	0	0	0	0	0	0	0	0	0	0	0		NONE	NONE
10-14-24-58	20 mg oral tablet, 1 tab(s), Oral, qPM	20	67	female	77.6	1.52	33.5873	NO	NKA	yes		PE	NO			rivaroxiban	None	INOPERABLE GB AdenoCarcinoma , PE	24	19	269	28.77	2.48	53	130.635	NONE	NONE	NONE	NONE	NONE	0	0	0	0	0	1	0	0	0	0	1		NONE	NONE
00-78-41-89	rivaroxaban 20 mg/ 1 tab(s) Oral Daily	20	67	M	92	1.57	37.324	NO	NKA	NO	NONE	NONE	NONE	NONE	NONE	RIVA	NO	HTN, AFIB, DM, DLD, HFREF	20	12	84	35.43	14.28	123	66.7353	NONE	NONE	NONE	NONE	NONE	0	0	0	0	0	1	0	0	0	1	1		NONE	NONE
00-62-13-85	rivaroxaban 20 mg/ 1 tab(s) Oral Daily	20	67	F	65	1.56	26.7094	NO	NKA	NO	NONE	NONE	NONE	NONE	NONE	RIVA	NO	AFIB 2014, DM , HTN, COPD, DLD, IBS, SOB.	22	22	144	40.94	19.98	71	81.6823	NONE	NONE	NONE	NONE	NONE	0	0	0	0	0	1	1	0	0	0	1		NONE	NONE
00-01-12-54	rivaroxaban 20 mg/ 1 tab(s) Oral Daily	20	67	F	67.4	1.48	30.7706	NO	NKA	NO	NONE	NONE	NONE	NONE	NONE	RIVA	NONE	T2DM, HTN, DLD, HYPOTHYROIDISM , AFIB	36	22	55	38.74	6.64	79	76.1212	NONE	NONE	NONE	NONE	NONE	0	0	0	0	0	1	1	0	0	0	1		NONE	NONE
00-11-09-61	rivaroxaban 20 mg/ 1 tab(s) Oral Daily	20	67	F	68.5	1.57	27.7902	NO	NKA	Yes	2010	PE	NONE	NONE	NONE	RIVA	ASA	DM, HTN, DLD, CAD,PE, HBV	17	17	80	36.77	8.03	62	98.5762	NONE	NONE	NONE	NONE	NONE	0	0	0	0	0	0	1	0	0	0	1		NONE	NONE
00-22-20-51	rivaroxaban 20 mg/ 1 tab(s) Oral Daily	20	67	M	79	1.69	27.6601	NO	NKA	NO	NONE	NONE	NONE	NONE	NONE	RIVA	ASA	MILD CAD, AFIB, DM, HTN.	19	8	72	36.94	7.54	84	83.9114	NONE	NONE	NONE	NONE	NONE	0	0	0	0	0	1	0	0	0	0	1		NONE	NONE
00-20-51-73	rivaroxaban 20 mg/ 1 tab(s) Oral Daily	20	67	F	85	1.59	33.6221	NO	NKA	NO	NONE	NONE	NONE	NONE	NONE	RIVA	CLOPIDO	T2DM, OSTEOPOROSIS, DLD, SEIZURE	23	22	62	33.2	12.92	47	161.359	NONE	NONE	NONE	NONE	NONE	0	0	0	0	0	1	0	0	0	0	1		NONE	NONE
00-49-32-31	rivaroxaban 20 mg/ 1 tab(s) Oral Daily	20	67	F	78	1.58	31.245	NO	NKA	NO	NONE	NONE	NONE	NONE	NONE	RIVA	NO	HTN, HYPERPARATHYROIDISM, LEFT THYROIDECTOMY, BREAST NODULE, ADRENAL MASS, OSTEOPENIA,	51	29	278	33.46	13.96	53	131.308	NONE	NONE	NONE	NONE	NONE	0	0	0	0	0	1	0	0	0	0	0		NONE	NONE
00-12-32-42	rivaroxaban 20 mg/ 1 tab(s) Oral Daily	20	67	F	78.5	1.5	34.8889	NO	NKA	Yes	2017	DVT	NONE	NONE	NONE	RIVA	ASA	PROVOKED DVT LEFT LEG POST KNEE REPLACEMENT , RECEIVED ANTICOAGULANT 6 MONTHS THEN SHIFTED TO ASA	35	14	99	34	12	85	82.3993	NONE	NONE	NONE	NONE	NONE	0	0	0	0	0	0	0	0	0	0	0		NONE	NONE
01-04-47-65	10 mg daily	10	68	female	54	1.55	22.4766	NO	NKA	yes		DVT	no			rivaroxaban	None	DM, HTN, DVT, IHD	14	14	145	28.45	7.64	102	46.5882	NONE	NONE	NONE	NONE	NONE	0	0	0	0	0	1	0	0	0	0	1		NONE	NONE
10-08-70-10	10 mg daily	10	68	female	82.6	1.49	37.2055	NO	NKA	no			no			rivaroxaban	None	TKR, hypothyrodism, mild asthma	54	9	127	29	9.64	52	139.785	NONE	NONE	NONE	NONE	NONE	0	0	0	0	0	0	0	0	0	0	0		NONE	NONE
10-14-78-92	10 mg oral daily	10	68	male	90	1.6	35.1562	NO	contrast	yes		DVT	no			rivaroxiban	None	DM,HTN,DVT,DLD,GERD,BPH,CARDIOMYOPATHY,BED REDDDEN	12	16	262	11.09	12.54	133	59.5489	NONE	NONE	NONE	NONE	NONE	0	0	0	0	0	1	1	0	0	0	1		NONE	NONE
01-12-73-77	20 mg oral tablet, 10 mg, 0.5 tab(s), Oral, Daily	10	68	female	90	1.5	40	no	NKA	no			yes			rivaroxaban	None	CKD, DM, HTN	35	14	99	34	12	85	93.1765	NONE	NONE	NONE	NONE	NONE	0	0	0	0	0	0	1	0	0	0	0		NONE	NONE
00-07-67-25	rivaroxaban 10 mg / 1 tab(s) Oral Daily	10	68	F	93	1.63	35.0032	NO	CEFAZOLIN	NO	NONE	NONE	NONE	NONE	NONE	RIVA	NO	OA, TKR	35	14	99	34	12	85	96.2824	NONE	NONE	NONE	NONE	NONE	0	0	0	0	0	0	0	0	0	0	0		NONE	NONE
00-21-97-48	rivaroxaban 10 mg/ 1 tab(s) Oral Daily	10	68	F	44	1.55	18.3143	NO	NKA	NO	NONE	NONE	NONE	NONE	NONE	RIVA	NO	SSS WITH AFIB, ISCHEMIC STROKE 5 YEARS AGO, RIGHT CEREBELLAR HEMORRHAGE INFARCTION 15-3-2017, HYPOTHYROIDISM , DM , HTN, EPILEPSY	9	17	69	20.7	16.16	52	74.4615	NONE	NONE	NONE	NONE	NONE	0	0	0	0	0	1	1	0	0	0	1		NONE	NONE
00-62-89-20	rivaroxaban 10 mg/ 1 tab(s) Oral Daily	10	68	M	83.4	1.76	26.9241	NO	NKA	NO	NONE	NONE	NONE	NONE	NONE	RIVA	NO	DM , HTN, DLD, HEPATITIS, HX OF RTA 14 YEARS AGO UNDER WENT RIGHT ANKLE ORIF	21	21	108	31.58	7.5	55	133.44	NONE	NONE	NONE	NONE	NONE	0	0	0	0	0	1	1	0	0	0	1		NONE	NONE
00-77-34-75	rivaroxaban 10 mg/ 1 tab(s) Oral Daily	10	68	M	86	1.63	32.3685	NO	NKA	NO	NONE	NONE	NONE	NONE	NONE	RIVA	ASA	HTN, TKR	23	19	90	33.11	12.44	70	108.114	NONE	NONE	NONE	NONE	NONE	0	0	0	0	0	1	0	0	0	0	0		NONE	NONE
00-65-89-63	rivaroxaban 10 mg/ 1 tab(s) Oral Daily	10	68	M	73.8	1.58	29.5626	NO	SULFA DRUG	NO	NONE	NONE	NONE	NONE	NONE	RIVA	NO	BILATERAL TKR	35	14	99	34	12	85	76.4047	NONE	NONE	NONE	NONE	NONE	0	0	0	0	0	0	0	0	0	0	0		NONE	NONE
10-16-79-93	15 mg daily	15	68	female	41	1.55	17.0656	NO	NKA	no			yes			rivaroxiban	None	Activity intolerance, Alzheimers disease, Electrolytes abnormal, Epilepsy, Afib, HTN, hypotension	12	33	134	20.22	4.14	50	72.16	NONE	NONE	NONE	NONE	NONE	0	0	0	0	0	1	0	0	0	0	0		NONE	NONE
10-10-34-69	15 mg daily	15	68	female	180	1.55	74.922	NO	NKA	no			yes			rivaroxaban	None	OSA, HTN, Afib, Decompensated heart failure	26	22	102	28	9.03	80	198	NONE	NONE	NONE	NONE	NONE	0	0	0	0	0	0	0	0	0	0	0		NONE	NONE
10-13-06-20	15 mg oral daily	15	68	female	73	1.54	30.7809	NO	NKA	no			no			rivaroxiban	None	Stage C HFrEF,DCM based on CAG ,Severe LVSD EF<25%,Severe MR , ADHF	92	36	87	34.22	46.86	125	51.392	NONE	NONE	NONE	NONE	NONE	0	0	0	0	0	1	0	0	0	0	0		NONE	NONE
01-18-76-55	15 mg oral qpm	15	68	female	53	1.47	24.5268	NO	NKA	no			yes		A-fib	rivaroxiban	None	a-fib	23	28	105	34	6.25	127	36.7244	NONE	NONE	NONE	NONE	NONE	0	0	0	0	0	1	1	0	0	0	1		NONE	NONE
01-15-56-24	15 mg oral tablet, 1 tab(s), Oral, qPM	15	68	female	80	1.7	27.6817	NO	NKA	NO			YES		A-fib	rivaroxiban	None	DM,HF,IHD,POSTLIVER TRANSPLANT	29	15	163	34.01	9.38	118	59.661	NONE	NONE	NONE	NONE	NONE	0	0	0	0	0	0	0	0	0	0	0		NONE	NONE
00-43-41-74	rivaroxaban 15 mg / 1 tab(s) Oral Daily	15	68	F	64.5	1.545	27.0211	NO	Apricot/peach	NO	NONE	NONE	None	None	None	Rivaroxaban	None	T2DM, HTN, HF, AFIB, DEPRESSION, IBS ON PANTOPRAZL	22	14	96	31.31	3.6	113	50.2301	None	None	None	None	None	0	0	0	0	0	0	1	1	1	1	1		NONE	NONE
00-33-04-16	rivaroxaban 15 mg / 1 tab(s) Oral Daily	15	68	M	114	1.74	37.6536	NO	NKA	NO	NONE	NONE	NONE	NONE	NONE	RIVA	NO	DM, HTN, CKD, DLD, ISCHEMIC CMP EF40%, AFIB, TIA 2017.	14	19	89	39.3	10.64	282	35.5745	NONE	NONE	NONE	NONE	NONE	0	0	0	0	0	1	0	0	0	1	1		NONE	NONE
00-00-78-84	rivaroxaban 15 mg / 1 tab(s) Oral QPM	15	68	F	119	1.6	46.4844	NO	NKA	Yes	NOT CLEAR	DVT	NONE	NONE	NONE	RIVA	NONE	SLE, DVT, CVA, PE FOR IN 2018, HERNIA, PERIPHERAL NEUROPATHY	17	17	74	31.41	7.58	59	177.492	NONE	NONE	NONE	NONE	NONE	1	0	0	0	0	1	1	0	0	1	1		NONE	NONE
00-44-98-01	rivaroxaban 15 mg/ 1 tab(s) Oral Daily	15	68	F	80	1.67	28.6851	NO	NKA	NO	NONE	NONE	NONE	NONE	NONE	RIVA	NO	DM, HTN, MOOD COGNITIVE DISORDER, PSYCHIATRIC DISORDER, ACUTE HF, STROKE	35	14	99	34	12	85	82.8235	NONE	NONE	NONE	NONE	NONE	0	0	0	0	0	1	0	0	1	0	1		NONE	NONE
00-29-91-91	rivaroxaban 15 mg/ 1 tab(s) Oral Daily	15	68	M	93.8	1.725	31.5228	NO	NKA	NO	NONE	NONE	NONE	NONE	NONE	RIVA	ASA BUT STOP IT	DM, DLD. HTN, AFIB	24	18	114	32.38	18.18	110	75.04	NONE	NONE	NONE	NONE	NONE	0	0	0	0	0	0	1	0	0	0	1		NONE	NONE
10-22-63-28	20 mg daily	20	68	male	54	1.75	17.6327	ex heavy smoker	NKA	no			yes			rivaroxaban	aspirin 81 mg, plavix 75 mg daily	HTN, IHD, DM, Afib, EF 35-40%.	18	12	97	41.18	9.92	93	51.0968	NONE	NONE	NONE	NONE	NONE	0	0	0	0	0	1	0	0	0	1	1		NONE	NONE
02-55-13-41	20 mg daily	20	68	male	62	1.69	21.7079	yes	NKA	yes		left upper and lower segmental PE	no			rivaroxaban	aspirin, 81 mg, Oral, Daily	DM, PUD, GERD, AKI, HF	35	14	99	34	12	85	64.1882	NONE	NONE	NONE	NONE	NONE	0	0	0	0	0	1	1	0	0	0	1		NONE	NONE
10-19-31-38	20 mg daily	20	68	female	112	1.59	44.302	NO	NKA	yes		DVT	no			rivaroxaban	None	DVT, DM, HTN, BA	33	23	79	40.93	3	75	131.413	NONE	NONE	NONE	NONE	NONE	0	0	0	0	0	1	0	0	0	0	1		NONE	NONE
10-22-44-76	20 mg daily	20	68	female	85	1.58	34.049	NO	NKA	no			yes			rivaroxaban	None	HTN, PHTN, Cerebral stroke, Stable left tentorial meningioma, bed ridden and passes urine and stool in diapers	18	14	98	23.27	6.7	42	178.095	NONE	NONE	NONE	NONE	NONE	0	0	0	0	0	1	0	0	0	0	0		NONE	NONE
01-12-67-53	20 mg daily	20	68	female	80	1.55	33.2986	no	NKA	no			yes			rivaroxaban	aspirin, 81 mg, Oral, Daily	DM, IHD, LVSD, hypothyrodism, DLP, Afib	31	38	125	29.53	21.46	94	74.8936	NONE	NONE	NONE	NONE	NONE	0	0	0	0	0	0	0	0	0	0	0		NONE	NONE
00-99-12-98	20 mg daily	20	68	female	81.4	1.475	37.4145	NO	NKA	no			yes			rivaroxaban	None	HTN, DM, BA, hypothyrodism, Afib	11	20	130	29.36	15.21	67	106.913	NONE	NONE	NONE	NONE	NONE	0	0	0	0	0	0	0	0	0	0	0		NONE	NONE
01-19-18-12	20 mg daily	20	68	male	55	1.64	20.4491	NO	NKA	no			yes			rivaroxaban	None	HTN, Afib, PFO	27	22	91	42.27	13.17	89	54.382	NONE	NONE	NONE	NONE	NONE	0	0	0	0	0	0	0	0	0	0	0		NONE	NONE
01-16-24-23	20 mg daily qpm	20	68	female	97	1.61	37.4214	NO	NKA	no			yes		A-FIB	rivaroxiban	None	DM,HTN	35	14	99	34	12	85	100.424	NONE	NONE	NONE	NONE	NONE	0	0	0	0	0	0	0	0	0	0	0		NONE	NONE
01-17-94-31	20 mg oral qpm	20	68	male	81	1.73	27.0641	NO	NKA	no			no			rivaroxiban	None	HTN,DM,HYPOTHYODSIM,	46	31	44	42.6	10.76	72	99	NONE	NONE	NONE	NONE	NONE	0	0	0	0	0	0	0	0	0	1	0		NONE	NONE
10-12-10-16	20 mg oral tablet, 1 tab(s), Oral, qPM	20	68	male	72	1.71	24.623	NO	NKA	yes		PE	no			rivaroxiban	None	HTN,DEMNTIA,OLD STROKE,PE	40	37	184	20.51	11.88	51	124.235	NONE	NONE	NONE	NONE	NONE	0	0	0	0	0	0	1	0	0	0	0		NONE	NONE
10-12-50-05	20 mg oral tablet, 1 tab(s), Oral, qPM	20	68	female	84	1.56	34.5168	NO	NKA	no			no			rivaroxiban	None	HTN	21	13	33	31.21	7.52	56	132	NONE	NONE	NONE	NONE	NONE	0	0	0	0	0	0	0	0	0	0	0		NONE	NONE
10-11-41-58	20 mg oral tablet, 1 tab(s), Oral, qPM	20	68	female	63	1.6	24.6094	NO	NKA	no			yes		A-fib	rivaroxiban	None	HTN,DM,A-FIB,	15	9	71	35.04	5.62	55	100.8	NONE	NONE	NONE	NONE	NONE	0	0	0	0	0	0	0	0	0	0	0		NONE	NONE
10-07-25-67	rivaroxaban 20 mg/ 1 tab(s) Oral Daily	20	68	M	90	1.72	30.4218	Yes	NKA	NO	NONE	NONE	None	None	None	Rivaroxaban	None	T2DM, HF, HTN, DLP, COPD, AFIB, OSTEOPOROSIS, HX OF ADRENAL INCIDENTALOMA	36	21	58	25.9	13.58	71	111.549	None	None	None	None	None	0	0	0	0	0	1	1	0	1	1	1		NONE	NONE
00-25-60-91	rivaroxaban 20 mg/ 1 tab(s) Oral Daily	20	68	F	100	1.58	40.0577	NO	NKA	NO	NONE	NONE	NONE	NONE	NONE	RIVA	NO	T2DM, HTN, AFIB, OA, HYPOTHYROIDISM , DIASTOLIC DYSFUNCTION II + MILD PHTN	15	14	55	32.53	6.68	121	72.7273	NONE	NONE	NONE	NONE	NONE	0	0	0	0	0	1	0	0	0	1	1		NONE	NONE
00-83-04-00	rivaroxaban 20 mg/ 1 tab(s) Oral Daily	20	68	M	105	1.82	31.6991	NO	NKA	NO	NONE	NONE	NONE	NONE	NONE	RIVA	NO	DM, DLD. HTN, OA, OBESITY	20	17	75	36.82	9.83	89	103.82	NONE	NONE	NONE	NONE	NONE	0	0	0	0	0	1	1	0	0	0	1		NONE	NONE
00-75-61-55	rivaroxaban 20 mg/ 1 tab(s) Oral Daily	20	68	F	85	1.58	34.049	NO	NKA	NO	NONE	NONE	NONE	NONE	NONE	RIVA	ASA	PAFIB, HTN, DM	25	14	99	35.5	4.38	72	103.889	NONE	NONE	NONE	NONE	NONE	0	0	0	0	0	1	0	0	0	0	1		NONE	NONE
00-72-63-42	rivaroxaban 20 mg/ 1 tab(s) Oral Daily	20	68	F	84.6	1.48	38.6231	NO	NKA	NO	NONE	NONE	NONE	NONE	NONE	RIVA	ASA	HCV, HTN, DIASTOLIC DYSFUNCTION, GERD, ILD,	21	20	130	31.37	4.5	101	73.7109	NONE	NONE	NONE	NONE	NONE	0	0	0	0	0	0	0	0	0	1	0		NONE	NONE
00-08-51-35	rivaroxaban 20 mg/ 1 tab(s) Oral Daily	20	68	F	84	1.595	33.0185	NO	NKA	NO	NONE	NONE	NONE	NONE	NONE	RIVA	NO	PAROXYSMAL AFIB, DLD, HTN,	35	14	99	34	12	85	86.9647	NONE	NONE	NONE	NONE	NONE	0	0	0	0	0	0	1	0	0	0	0		NONE	NONE
00-10-63-09	rivaroxaban 20 mg/ 1 tab(s) Oral Daily	20	68	M	71.4	1.7	24.7059	NO	NKA	NO	NONE	NONE	NONE	NONE	NONE	RIVA	ASA	HTN, AFIB, DILATED CARDIOMAYOPATHY, LT NEPHRECTOMY, LT RENAL MASS	24	18	74	38.12	13.16	154	40.8	NONE	NONE	NONE	NONE	NONE	0	0	0	0	0	1	0	0	0	0	0		NONE	NONE
00-76-31-90	rivaroxaban 20 mg/ 1 tab(s) Oral Daily	20	68	M	93	1.7	32.1799	NO	NKA	NO	NONE	NONE	NONE	NONE	NONE	RIVA	ASA	HTN, BPH, RT. KIDNY STONE, AFIB, LUMBER SPINAL CANAL STENOSIS WITH DISC PROLAPSE, LUMBAR DECOPRESSION AND FIXATION 1 YEAR AGO, APPENDICTOMY	35	14	99	34	12	85	96.2824	NONE	NONE	NONE	NONE	NONE	0	0	0	0	0	1	0	0	0	0	0		NONE	NONE
00-53-71-01	rivaroxaban 20 mg/ 1 tab(s) Oral Daily	20	68	F	83	1.6	32.4219	NO	NKA	NO	NONE	NONE	NONE	NONE	NONE	RIVA	ASA	AFIB, HBV, ESSENTIAL TROMBOCYTOSIS	18	17	69	37.35	12.35	57	128.14	NONE	NONE	NONE	NONE	NONE	0	0	0	0	0	0	0	0	0	0	0		NONE	NONE
00-46-29-97	rivaroxaban 20 mg/ 1 tab(s) Oral Daily	20	68	M	80	1.6	31.25	NO	NKA	Yes	2019	PROXIAL INTERNAL JUGULAR VENOUS THROMBOSIS	NONE	NONE	NONE	RIVA	NO	TONSILLAR NHLLIMITED STAGE, JUGULAR VENOUS THROMBOSIS	32	17	92	37.82	10.68	84	83.8095	NONE	NONE	NONE	NONE	NONE	0	0	0	0	0	0	0	0	0	0	0		NONE	NONE
02-06-34-26	10 mg daily	10	69	female	92	1.66	33.3866	NO	NKA	no			no			rivaroxaban	aspirin, 81 mg, Oral, Daily	HTN, DM, DLD	11.9	11.5	106	37.5	2.6	55	145.156	NONE	NONE	NONE	NONE	NONE	0	0	0	0	0	1	1	0	0	0	1		NONE	NONE
10-19-57-50	10 mg daily	10	69	female	96	1.556	39.6508	NO	NKA	no			no			rivaroxaban	None	TKR, DM, HTN, DLD	7	16	105	24.18	8.52	47	177.248	NONE	NONE	NONE	NONE	NONE	0	0	0	0	0	1	1	0	0	0	1		NONE	NONE
10-23-07-76	10 mg daily	10	69	female	71	1.46	33.3083	NO	NKA	no			no			rivaroxaban	None	DMT2, HTN, DLD, OA and depression	23	26	105	31.06	9.55	47	131.09	NONE	NONE	NONE	NONE	NONE	0	0	0	0	0	1	1	0	0	0	1		NONE	NONE
10-00-74-61	10 mg daily	10	69	female	60	1.6	23.4375	NO	NKA	yes	AFTER HIP REPLACEMENT JULY 2015	PROVOKED DVT AND EXTENSIVE BILATERAL PE	no			rivaroxaban	aspirin, 81 mg, Oral, Daily	Subclinical Hypothyroidism, Osteopetrosis, depression, hip pain	16	27	86	35.78	8.74	63	82.6455	NONE	NONE	NONE	NONE	NONE	0	0	0	0	0	1	1	1	0	0	0		NONE	NONE
10-19-98-89	10 mg daily	10	69	female	72	1.54	30.3593	NO	NKA	no			no			rivaroxaban	None	LEFT KNEE OA FOR LEFT TKR	12	11	74	27.14	11.96	55	113.6	NONE	NONE	NONE	NONE	NONE	0	0	0	0	0	0	0	0	0	0	0		NONE	NONE
10-13-00-13	10 mg oral daily for 25 days	10	69	female	85	1.52	36.7902	NO	NKA	no			no			rivaroxiban	None	TKR	14	16	52	24.22	9.09	38	194.108	NONE	NONE	NONE	NONE	NONE	0	0	0	0	0	0	0	0	0	0	0		NONE	NONE
10-14-38-70	10 mg oral daily for 25 days	10	69	female	81	1.5	36	NO	NKA	no			no			rivaroxiban	None	TKR,HTN,DM,DLD	20	20	70	30.66	7.57	41	171.439	NONE	NONE	NONE	NONE	NONE	0	0	0	0	0	0	0	0	0	0	0		NONE	NONE
00-89-60-25	rivaroxaban 10 mg / 1 tab(s) Oral Daily	10	69	F	60	1.5	26.6667	NO	NKA	NO	NONE	NONE	None	None	None	Rivaroxaban	None	HTN, DM, Hypothyroidism, Osteoporosis, Para umblical hernia, Laparoscopic cholecystectomy more than 10 years back (for cholidicolithiasis), B cell lymphoma	9	7	112	28.95	3.12	50	104.133	None	None	None	None	None	0	0	0	0	0	1	1	0	1	1	1		NONE	NONE
00-08-15-30	rivaroxaban 10 mg / 1 tab(s) Oral Daily	10	69	M	91	1.73	30.4053	NO	NKA	NO	NONE	NONE	NONE	NONE	NONE	RIVA	ASA	POST LEFT TKR, OA,	19	25	95	28.96	24.38	71	111.222	NONE	NONE	NONE	NONE	NONE	0	0	0	0	0	0	0	0	0	0	0		NONE	NONE
00-36-11-67	rivaroxaban 10 mg/ 1 tab(s) Oral Daily	10	69	M	70	1.65	25.7117	NO	NKA	NO	NONE	NONE	NONE	NONE	NONE	RIVA	NO	DM , HTN, AFIB, COGNITIVE IMPAIRMENT	13	17	62	41.21	7.8	53	114.612	NONE	NONE	NONE	YES, 2	NONE	0	0	0	0	0	1	0	0	0	0	1		NONE	NONE
00-06-01-88	rivaroxaban 10 mg/ 1 tab(s) Oral Daily	10	69	F	50.3	1.44	24.2573	NO	NKA	NO	NONE	NONE	NONE	NONE	NONE	RIVA	NO	DM, HTN, TKR	35	14	99	34	12	85	51.352	NONE	NONE	NONE	NONE	NONE	0	0	0	0	0	0	0	0	0	0	1		NONE	NONE
00-35-37-13	rivaroxaban 10 mg/ 1 tab(s) Oral Daily	10	69	F	62	1.45	29.4887	NO	NKA	NO	NONE	NONE	NONE	NONE	NONE	RIVA	NO	HCV, HEPATITIS C VIRUS, HTN, OA, TKR	16	13	123	41.31	16.66	58	92.7625	NONE	NONE	NONE	NONE	NONE	0	0	0	0	0	1	0	0	0	0	0		NONE	NONE
00-24-37-98	rivaroxaban 10 mg/ 1 tab(s) Oral Daily	10	69	F	86	1.55	35.796	NO	NKA	NO	NONE	NONE	NONE	NONE	NONE	RIVA	NO	TKR	17	48	80	36.3	10.52	61	122.342	NONE	NONE	NONE	NONE	NONE	0	0	0	0	0	0	0	0	0	0	0		NONE	NONE
00-78-91-50	rivaroxaban 10 mg/ 1 tab(s) Oral Daily	10	69	F	40.5	1.38	21.2665	NO	NKA	NO	NONE	NONE	NONE	NONE	NONE	RIVA	NO	AFIB	35	14	99	34	12	85	41.3471	NONE	NONE	NONE	NONE	NONE	0	0	0	0	0	0	0	0	0	0	0		NONE	NONE
00-83-27-73	rivaroxaban 10 mg/ 1 tab(s) Oral Daily	10	69	F	78	1.62	29.7211	NO	NKA	NO	NONE	NONE	NONE	NONE	NONE	RIVA	NO	ACHILLES TENDON REPAIR	35	14	99	34	12	85	79.6314	NONE	NONE	NONE	NONE	NONE	0	0	0	0	0	0	0	0	0	0	0		NONE	NONE
10-16-89-86	15 mg daily	15	69	male	76	1.7	26.2976	NO	ALLOPURINOL	no			yes			rivaroxiban	None	HFrEF, DM, Afib, Dilated cardiomyopathy	310	603	152	29.7	32.77	451	14.6233	NONE	NONE	NONE	NONE	NONE	0	0	0	0	0	1	0	0	1	0	1		NONE	NONE
10-21-11-69	15 mg daily	15	69	male	68.2	1.64	25.3569	NO	NKA	no			yes			rivaroxaban	None	HTN, PHTN, CKD, Afib, DM, Chronic hyperuricemia, Left Pulmonary Artery Endarterectomy + CABG + TV repair, IVC filter was inserted	27	21	214	37.24	21.24	127	46.6003	NONE	NONE	NONE	NONE	NONE	0	0	0	0	0	1	1	1	0	0	1		NONE	NONE
02-28-81-86	15 mg daily	15	69	male	63	1.69	22.0581	sheesha smoker	NKA	no			yes			rivaroxaban	None	CKD, HTN, DM, Afib, hypothyrodism	61	34	115	26.61	12.66	121	45.1818	NONE	NONE	NONE	NONE	NONE	0	0	0	0	0	1	1	1	0	0	1		NONE	NONE
02-49-26-83	15 mg daily	15	69	female	89	1.6	34.7656	NO	NKA	no			yes	2016		rivaroxaban	None	AF, HTN, DM, Knee OA, Blurring of visual image	27	0	0	29.7	9.58	87	88.7727	NONE	NONE	NONE	NONE	NONE	0	0	0	0	0	1	1	0	0	0	1		NONE	NONE
01-20-56-03	15 mg daily	15	69	male	80	1.7	27.6817	NO	NKA	yes	22/8/2019	bilateral PE	no			rivaroxaban	Aspirin 81mg po od, clopidogrel 75 mg oral tablet	stroke, HTN, anxeity	70	29	89	25.45	11.3	67	103.615	NONE	NONE	NONE	NONE	NONE	0	0	0	0	0	1	0	0	0	0	0		NONE	NONE
00-86-51-51	15 mg oral tablet, 1 tab(s), Oral, qPM	15	69	female	90	1.48	41.0884	NO	green leaves	no			yes	43136	PAROXIZMAL AF	rivaroxaban	ASPIRIN 300MG, PLAVIX 300MG	HTN, DM, DLD, B.A	25	16	138	35.47	4.96	65	120.154	NONE	NONE	NONE	NONE	NONE	0	0	0	0	0	1	1	0	0	0	1		NONE	NONE
00-64-26-96	rivaroxaban 15 mg / 1 tab(s) Oral Daily	15	69	F	87	1.55	36.2123	NO	BANANA, EGG CONTAINING COMPOUND	NO	NONE	NONE	NONE	NONE	NONE	RIVA	NO	AFIB, DM, HTN, DLD, OSTEOPETROSIS, CKD, HF	35	14	99	34	12	85	88.8196	NONE	NONE	NONE	NONE	NONE	0	0	0	0	0	1	0	0	0	1	1		NONE	NONE
00-69-11-49	rivaroxaban 15 mg / 1 tab(s) Oral Daily	15	69	F	80	1.6	31.25	NO	NKA	NO	NONE	NONE	NONE	NONE	NONE	RIVA	ASA	HTN, DM, IHD, STROKE, OA	35	14	99	34	12	85	81.6732	NONE	NONE	NONE	NONE	NONE	0	0	0	0	0	1	0	0	0	0	1		NONE	NONE
00-04-64-79	rivaroxaban 15 mg / 1 tab(s) Oral Daily	15	69	F	68	1.47	31.4684	NO	NKA	NO	NONE	NONE	NONE	NONE	NONE	RIVA	NO	DM, HTN, DLD, AFIB	53	19	66	38.77	6.47	60	98.3481	NONE	NONE	NONE	YES	NONE	0	0	0	0	0	1	0	0	0	0	1		NONE	NONE
00-01-70-57	rivaroxaban 15 mg / 1 tab(s) Oral QPM	15	69	F	61	1.57	24.7475	NO	NSAID, TEGADERM	NO	NONE	NONE	NONE	NONE	NONE	RIVA	NO	DLD, AFIB, HTN, URTICARIA, OSTEOPOROSIS, OSTEOPOROSIS, BREAST CA, PARATHYROID ADEOMA	20	14	46	37.41	10.39	73	72.5129	NONE	NONE	NONE	NONE	NONE	0	0	0	0	0	0	1	0	0	0	0		NONE	NONE
10-24-57-41	rivaroxaban 15 mg / 1 tab(s) Tab Oral HS	15	69	F	68	1.6	26.5625	NO	NKA	NO	NONE	NONE	yes	newly	AFIB	Rivaroxaban	None	DM, HTN, Breast Cancer, new onset Afib	25	24	196	27.97	11.74	86	68.615	None	None	None	None	None	0	0	0	0	0	1	1	0	1	1	1		NONE	NONE
00-81-12-10	rivaroxaban 15 mg/ 1 tab(s) Oral Daily	15	69	F	70	1.49	31.5301	NO	NKA	NO	NONE	NONE	NONE	NONE	NONE	RIVA	NO	DM, HTN, RECURRENT DVT ON LIFE LONG AC, DLD, DEPRESSION,	32	14	99	36.83	14.84	63	96.4198	NONE	NONE	NONE	NONE	NONE	0	0	0	0	0	1	1	0	0	0	1		NONE	NONE
01-01-19-03	20 mg daily	20	69	male	92	1.6	35.9375	NO	NKA	no			yes			rivaroxaban	None	DM, HTN, CVA, BPH, depression, CAPG	31	20	143	30.42	9.58	88	90.7222	NONE	NONE	NONE	NONE	NONE	0	0	0	0	0	1	0	0	0	1	1		NONE	NONE
10-20-26-69	20 mg daily	20	69	male	66	1.67	23.6652	yes	NKA	no			yes			rivaroxaban	None	DM, HF, Afib, Dilated LA, left heart cath	22	15	105	36.81	10.77	66	86.7778	NONE	NONE	NONE	NONE	NONE	0	0	0	0	0	1	0	0	1	0	1		NONE	NONE
10-11-26-98	20 mg daily	20	69	male	76.9	1.8	23.7346	NO	NKA	no			no			rivaroxaban	aspirin, 81 mg, Oral, Daily	HTN, DLD, DM, PVD	24	14	74	43.6	8.08	89	74.9799	NONE	NONE	NONE	NONE	NONE	0	0	0	0	0	1	1	0	0	0	1		NONE	NONE
10-07-25-67	20 mg daily	20	69	male	80	1.7	27.6817	yes	NKA	no			yes			rivaroxaban	None	HTN, DLD, DM, Afib, COPD, OP, Adrenal incidentaloma	36	21	58	25.9	13.58	71	97.7778	NONE	NONE	NONE	NONE	NONE	0	0	0	0	0	1	0	0	0	0	1		NONE	NONE
01-02-29-37	20 mg daily	20	69	male	88.4	1.618	33.7672	NO	NKA	no			yes			rivaroxaban	None	HTN, DM, DLP, Afib	34	18	64	38.99	12.36	104	73.7611	NONE	NONE	NONE	NONE	NONE	0	0	0	0	0	0	0	1	0	0	0		NONE	NONE
01-10-33-20	20 mg daily	20	69	female	61	1.6	23.8281	NO	NKA	no			yes			rivaroxaban	ASA, 81 mg, Oral, Daily	HTN , hyperlipidemai, Afib, knee pain	16	10	154	34.54	7.24	89	59.4769	NONE	NONE	NONE	NONE	NONE	0	0	0	0	0	1	0	0	0	0	0		NONE	NONE
10-20-61-14	20 mg daily	20	69	female	112	1.62	42.6764	NO	NKA	no			yes		PAF	rivaroxaban	None	HTN, Afib	16	13	100	32.6	6.1	64	151.861	NONE	NONE	NONE	NONE	NONE	0	0	0	0	0	1	0	0	0	0	0		NONE	NONE
10-23-15-45	20 mg daily	20	69	female	92.5	1.65	33.9761	NO	NKA	no			yes			rivaroxaban	None	HTN, Afib, BA	16	10	102	39.58	7.1	66	121.62	NONE	NONE	NONE	NONE	NONE	0	0	0	0	0	1	0	0	0	0	0		NONE	NONE
10-21-16-22	20 mg daily	20	69	male	84	1.75	27.4286	NO	NKA	no			yes			rivaroxaban	None	BPH, HTN, Afib, Hearing problems	18	13	108	35.94	9.76	70	104.133	NONE	NONE	NONE	NONE	NONE	0	0	0	0	0	1	0	0	0	0	0		NONE	NONE
10-18-92-35	20 mg daily	20	69	female	74	1.4057	37.4495	NO	sulfa drugs	no			yes		PAF	rivaroxaban	None	BA, DM, HTN, PAF	35	14	99	34	12	63	101.929	NONE	NONE	NONE	NONE	NONE	0	0	0	1	0	0	0	0	0	0	0		NONE	NONE
10-17-22-09	20 mg daily	20	69	male	103	1.9	28.5319	NO	NKA	no			no			rivaroxiban	None	leukemia, Sickle cell Disease, seizure, CVT	35	14	99	34	12	85	105.154	NONE	NONE	NONE	NONE	NONE	0	0	0	0	0	0	0	0	0	0	0		NONE	NONE
10-08-63-39	20 mg daily	20	69	male	109	1.75	35.5918	NO	NKA	yes	2017	DVT, PE	no			rivaroxaban	None	DVT, PE	24	14	90	28.82	7.41	74	127.821	NONE	NONE	NONE	NONE	NONE	0	0	0	0	0	0	0	0	0	0	0		NONE	NONE
02-51-46-23	20 mg daily	20	69	female	120	1.65	44.0771	NO	NKA	yes		PE	yes			rivaroxaban	None	OSA, DM, HTN, IHD, PE, Afib	17	17	162	27.46	15.66	228	45.6725	NONE	NONE	NONE	NONE	NONE	0	0	0	0	0	0	0	0	0	0	0		NONE	NONE
01-05-72-40	20 mg for 120 days	20	69	male	105	1.785	32.9544	NO	NKA	no			yes			rivaroxaban	clopidogrel, 75 mg, Oral, Daily	Afib	35	14	99	34	12	85	107.196	NONE	NONE	NONE	NONE	NONE	0	0	0	0	0	1	0	0	0	0	0		NONE	NONE
10-16-25-05	20 mg oral daily	20	69	female	76	1.56	31.2295	NO	NKA	no			yes		a-fib	rivaroxiban	None	HTN,DM,AF,METASTATIC SEGMOID CANCER	70	162	189	22.91	18.48	144	45.7994	NONE	NONE	NONE	NONE	NONE	0	0	0	0	0	1	0	0	0	0	1		NONE	NONE
01-17-04-89	20 mg oral daily	20	69	female	78	1.6	30.4687	NO	NKA	no			yes		A-FIB	rivaroxiban	None	HTN,DM,IHD,A-FIB	14	14	99	35.1	10.15	99	68.3704	NONE	NONE	NONE	NONE	NONE	0	0	0	0	0	1	1	0	0	0	1		NONE	NONE
10-13-27-11	20 mg oral tablet, 1 tab(s), Oral, qPM	20	69	female	73.5	1.64	27.3275	NO	NKA	no			yes		a-fib	rivaroxiban	None	HTN,DM,OSTEOPENEA	22	14	66	39	8.32	87	73.3123	NONE	NONE	NONE	NONE	NONE	0	0	0	0	0	1	0	0	0	0	0		NONE	NONE
00-90-37-45	20 mg qPM	20	69	male	75.4	1.78	23.7975	NO	NKA	no			no			rivaroxaban	aspirin, 81 mg, Oral, Daily	IHD, HTN, PCI	35	14	99	34	12	85	76.977	NONE	NONE	NONE	NONE	NONE	0	0	0	0	0	1	0	0	0	0	0		NONE	NONE
00-00-80-40	rivaroxaban 20 mg / 1 tab(s) Oral QPM	20	69	F	93.5	1.55	38.9178	NO	NKA	NO	NONE	NONE	NONE	NONE	NONE	RIVA	NONE	HTN, AFIB OSTEOARTHRITIS, VHD DM,	26	19	71	37.46	10.92	60	135.229	NONE	NONE	NONE	NONE	NONE	0	0	0	0	0	0	0	0	0	0	1		NONE	NONE
00-43-41-74	rivaroxaban 20 mg/ 1 tab(s) Oral Daily	20	69	F	65.5	1.54	27.6185	NO	APRICOT, PEACH	NO	NONE	NONE	NONE	NONE	NONE	RIVA	NO	HTN, DM, HF, AFIB, DEPRESSION, IRRITABLE BOWEL SYNDROME,	24	10	71	28	4.58	43	132.185	NONE	NONE	NONE	NONE	NONE	0	0	0	0	0	1	0	0	1	0	1		NONE	NONE
00-15-21-68	rivaroxaban 20 mg/ 1 tab(s) Oral Daily	20	69	M	98.5	1.72	33.295	NO	NKA	NO	NONE	NONE	NONE	NONE	NONE	RIVA	ASA	T2DM, RENAL TRANSPLANT, AFIB	21	15	78	35.6	11.15	116	73.6863	NONE	NONE	NONE	NONE	NONE	0	0	0	0	0	1	0	1	0	0	1		NONE	NONE
00-79-72-38	rivaroxaban 20 mg/ 1 tab(s) Oral Daily	20	69	F	85	1.54	35.8408	NO	NKA	NO	NONE	NONE	NONE	NONE	NONE	RIVA	ASA	DM, HTN, AFIB, DLD,	28	19	112	36.14	6.61	52	141.848	NONE	NONE	NONE	NONE	NONE	0	0	0	0	0	1	1	0	0	0	1		NONE	NONE
00-19-21-85	rivaroxaban 20 mg/ 1 tab(s) Oral Daily	20	69	M	88	1.745	28.8996	NO	NKA	NO	NONE	NONE	NONE	NONE	NONE	RIVA	ASA	DM, BPH, HTN, CVA, OSA (OBSTRUCTIVE SLEEP APNEA) DM	54	29	92	39.4	9.8	74	103.195	NONE	NONE	NONE	NONE	NONE	0	0	0	0	0	1	0	0	0	0	1		NONE	NONE
00-18-98-62	rivaroxaban 20 mg/ 1 tab(s) Oral Daily	20	69	F	61	1.45	29.0131	NO	NKA	Yes	?	DVT, PE	NONE	NONE	NONE	RIVA	ASA	DVT, PR, DM, HTN	121	58	135	32.04	4.21	67	79.0066	NONE	NONE	NONE	NONE	NONE	0	0	0	0	0	1	0	0	0	0	1		NONE	NONE
00-75-09-21	rivaroxaban 20 mg/ 1 tab(s) Oral Daily	20	69	M	67	1.58	26.8386	NO	EGG	NO	NONE	NONE	NONE	NONE	NONE	RIVA	NO	TKR 5 YEARS BACK, VALVE REPLACEMENT 16 YEARS BACK,HERNIA REPAIR 2 YEARS BACK, DM, BA, HTN AFIB,	29	27	131	37.25	17.69	84	69.2156	NONE	NONE	NONE	NONE	NONE	0	0	0	0	0	1	0	0	0	0	1		NONE	NONE
00-06-26-40	rivaroxaban 20 mg/ 1 tab(s) Oral Daily	20	69	F	83	1.49	37.3857	NO	BANANA, EGG CONTAINING COMPOUND, EGGPLANT	Yes	AFTER BARIATRIC SURGERY	PE	NONE	NONE	NONE	RIVA SINCE 3 YEARS	NO	DM, PE, OSA,	35	14	99	34	12	85	84.7359	NONE	NONE	NONE	NONE	NONE	0	0	0	0	0	0	0	0	1	1	0		NONE	NONE
00-58-47-74	rivaroxaban 20 mg/ 1 tab(s) Oral Daily	20	69	F	75.4	1.48	34.4229	NO	NKA	NO	NONE	NONE	NONE	NONE	NONE	RIVA	NO	CKD, HTN, AFIB, BILATERAL KNWW OA	6	10	140	15	11.76	212	30.8634	NONE	NONE	NONE	NONE	NONE	0	0	0	0	0	0	0	0	1	0	0		NONE	NONE
00-10-83-87	rivaroxaban 20 mg/ 1 tab(s) Oral Daily	20	69	F	62.4	1.61	24.0731	NO	NKA	NO	NONE	NONE	NONE	NONE	NONE	RIVA	ASA	IVC THROMBOSIS, HTN, DLD,	31	38	342	18.8	16.7	50	108.299	NONE	NONE	NONE	NONE	NONE	0	0	0	0	0	1	1	0	0	0	0		NONE	NONE
00-38-57-98	rivaroxaban 20 mg/ 1 tab(s) Oral Daily	20	69	F	71	1.545	29.7441	NO	MORPHINE	Yes	39 YEARS BACK	DVT	NONE	NONE	NONE	RIVA	ASA	DLD, OSTEOPENIA, UTERINE CA SINCE 2007, HYSTERECTOMY, LEFT BREAST FIBROADENOMA	22	15	104	43.29	6.46	67	91.9585	NONE	NONE	NONE	NONE	NONE	0	0	0	0	0	0	1	0	0	0	0		NONE	NONE
00-79-85-54	rivaroxaban 20 mg/ 1 tab(s) Oral Daily	20	69	F	82	1.6	32.0312	NO	NKA	NO	NONE	NONE	NONE	NONE	NONE	RIVA	NO	OSTEOPENIA, OA, NEUROLOGIC BLADDER, ILIAC THROMBOSIS, CERVICAL MYELOPATHY	17	11	69	32.41	4.17	50	142.316	NONE	NONE	NONE	NONE	NONE	0	0	0	0	0	0	0	0	0	0	0		NONE	NONE
00-09-30-35	rivaroxaban 20 mg/ 1 tab(s) Oral Daily	20	69	M	80	1.69	28.0102	NO	NKA	NO	NONE	NONE	NONE	NONE	NONE	RIVA	NO	THALASSEMIA, ARRHYTHMIA, PREDIABETES, VIT, D DEFFIECIENCY	23	17	47	33.04	20.48	80	86.7778	NONE	NONE	NONE	NONE	NONE	0	0	0	0	0	0	0	0	0	0	0		NONE	NONE
00-25-32-48	rivaroxaban 20 mg/ 1 tab(s) Oral Daily	20	69	F	71	1.49	31.9805	NO	NKA	NO	NONE	NONE	NONE	NONE	NONE	RIVA	NO	AFIB, BA	26	27	59	37.65	5.46	69	89.2931	NONE	NONE	NONE	YES, 2	NONE	0	0	0	0	0	0	0	0	0	0	0		NONE	NONE
10-19-24-42	10 mg daily	10	70	female	80	1.54	33.7325	NO	NKA	no			no			rivaroxaban	None	TKR, OA, HTN, DLD	25	54	97	26.54	15.55	69	99.1948	NONE	NONE	NONE	NONE	NONE	0	0	0	0	0	1	1	0	0	0	0		NONE	NONE
10-23-12-31	10 mg daily	10	70	female	74	1.58	29.6427	NO	NKA	no			no			rivaroxaban	None	TKR, HTN	38	43	103	32.72	9.1	61	103.789	NONE	NONE	NONE	NONE	NONE	0	0	0	0	1	0	0	0	0	0	0		NONE	NONE
10-18-63-43	10 mg daily	10	70	female	80	1.6	31.25	NO	NKA	no			no			rivaroxaban	None	Vulvar discomfort	35	14	99	34	12	85	80.5229	NONE	NONE	NONE	NONE	NONE	0	0	0	0	0	0	0	0	0	0	0		NONE	NONE
10-20-93-68	10 mg daily	10	70	female	92	1.6	35.9375	NO	NKA	no			no			rivaroxaban	None	TKR, rheumatology disease, unable to walk now only with crutches	24	17	85	32.91	5.44	45	174.914	NONE	NONE	NONE	NONE	NONE	0	0	0	0	0	0	0	0	0	0	0		NONE	NONE
01-13-53-94	10 mg daily	10	70	male	69	1.713	23.5144	no	NKA	yes		recurrent un provoked DVT	no			rivaroxaban	None	DVT	20	18	71	35.39	8.02	75	78.7111	NONE	NONE	NONE	NONE	NONE	0	0	0	0	0	0	0	0	0	0	0		NONE	NONE
00-89-60-25	10 mg, Oral, Daily	10	70	female	60	1.47	27.7662	NO	NKA	no			no			rivaroxaban	None	DM, hypothyrodism, HTN, osteoprosis,	9	11	80	36.06	1.81	43	119.38	NONE	NONE	NONE	NONE	NONE	0	0	0	0	0	1	1	0	0	0	1		NONE	NONE
00-13-05-43	rivaroxaban 10 mg Oral Daily	10	70	F	77	1.63	28.9811	NO	NKA	Yes	?	DVT	NONE	NONE	NONE	RIVA	NO	DVT	35	14	99	34	12	85	77.5033	NONE	NONE	NONE	NONE	NONE	0	0	0	0	0	0	0	0	0	0	0		NONE	NONE
00-24-72-15	rivaroxaban 10 mg/ 1 tab(s) Oral Daily	10	70	F	94.5	1.57	38.3383	NO	NKA	NO	NONE	NONE	NONE	NONE	NONE	RIVA	NO	DM, HTN, DLD, IBS, MORBID OBESITY, TKR	14	10	76	32.2	11.83	50	161.7	NONE	NONE	NONE	NONE	NONE	0	0	0	0	0	0	1	0	0	0	1		NONE	NONE
10-17-93-83	15 mg daily	15	70	female	60	1.65	22.0386	NO	NKA	no			yes		PAF	rivaroxaban	None	PAF, DM, HTN, MI, HFrEF, Alzheimer's disease, follicular thyroid cancer, bed bound	54	51	59	27.99	6.3	124	41.3978	NONE	NONE	NONE	NONE	NONE	0	0	0	0	0	1	0	0	0	1	1		NONE	NONE
10-23-86-09	15 mg daily	15	70	male	85	1.75	27.7551	NO	NKA	no			no			rivaroxaban	aspirin 81 mg	CABG, HTN, DM, IHD, Bleeding	20	10	85	33.4	11.62	121	60.101	NONE	NONE	NONE	NONE	NONE	0	0	0	0	0	1	0	0	0	0	1		NONE	NONE
10-21-28-24	15 mg daily	15	70	female	61	1.52	26.4024	NO	NKA	no			yes			rivaroxaban	None	Afib, HTN, stroke, DM	24	10	105	29.47	4.44	101	51.6722	NONE	NONE	NONE	NONE	NONE	0	0	0	0	0	1	0	0	0	0	1		NONE	NONE
10-24-57-41	15 mg daily	15	70	female	61.8	1.6	24.1406	NO	NKA	no			yes			rivaroxaban	None	DM, HTN, Lt. Breast CA, Afib, moderately elevated pulmonary pressure, gluteal pressure ulcer	35	14	99	34	12	76	69.5702	NONE	NONE	NONE	NONE	NONE	0	0	0	0	0	1	0	0	0	0	1		NONE	NONE
01-02-01-52	15 mg daily	15	70	female	82	1.64	30.4878	NO	NKA	no			yes			rivaroxaban	None	HTN, biliary colic diagnosed, Afib	17	20	217	37.69	13.78	50	140.311	NONE	NONE	NONE	NONE	NONE	0	0	0	0	0	1	0	0	0	0	0		NONE	NONE
10-15-58-25	15 mg oral daily	15	70	male	87.5	1.58	35.0505	yes	NKA	no			no			rivaroxiban	aspirin 81 mg	severe ICMP with apical aneurysm ,HTN,PCI	29	13	62	37.73	7.36	99	75.6173	NONE	NONE	NONE	NONE	NONE	0	0	0	0	0	1	0	0	0	0	0		NONE	NONE
10-13-03-62	15 mg oral daily	15	70	male	86	1.68	30.4705	NO	NKA	no			no			rivaroxiban	None	thrombosis radial artery,HTN,IHD,DM	17	10	79	36.28	10.46	114	64.5419	NONE	NONE	NONE	NONE	NONE	0	0	0	0	0	0	0	0	0	0	0		NONE	NONE
00-94-74-37	15 mg oral tablet, 1 tab(s), Oral, qPM	15	70	male	63.8	1.64	23.721	NO	NKA	no			yes			rivaroxaban	None	HTN, IHD, stroke, DM, Afib	30	15	86	39.52	5.78	103	52.9946	NONE	NONE	NONE	NONE	NONE	0	0	0	0	0	0	0	0	0	0	0		NONE	NONE
01-01-09-42	15 mg qPM	15	70	female	80	1.6	31.25	NO	NKA	no			yes			rivaroxaban	None	DM, Afib, hypothyrodism, HTN, HF, NSTEMI	17	13	95	39.97	6.44	108	63.3745	NONE	NONE	NONE	NONE	NONE	0	0	0	0	0	1	0	0	0	0	1		NONE	NONE
01-14-78-86	15 mg table qpm	15	70	male	65.5	1.6	25.5859	no	NKA	no			no			rivaroxiban	aspirin 81 oral daily , clopidogre 75 mg daily	DM,HTN,IHD,PCI	26	19	102	41.94	5.74	197	28.4461	NONE	NONE	NONE	NONE	NONE	0	0	0	0	0	0	0	0	0	1	1		NONE	NONE
10-24-76-85	rivaroxaban 15 mg / 1 tab(s) Oral Daily	15	70	M	73.5	1.66	26.673	NO	NKA	NO	NONE	NONE	yes	Nov.2019	palpitation at rest and diagnosed of IHD	Rivaroxaban	None	DM type 2, hernia repaire, recent IHD	22	22.22	50	28.66	7.18	175	35.9333	None	None	None	None	None	0	0	0	0	0	1	0	0	1	1	1		NONE	NONE
00-46-03-97	rivaroxaban 15 mg / 1 tab(s) Oral Daily	15	70	M	71	1.63	26.7229	NO	NKA	NO	NONE	NONE	NONE	NONE	NONE	RIVA	ASA	DM, HTN, AFIB, SEVERE LVSD,	20	19	100	30.88	5.72	226	26.8781	NONE	NONE	NONE	NONE	NONE	0	0	0	0	0	1	0	0	1	0	1		NONE	NONE
00-38-19-93	rivaroxaban 15 mg / 1 tab(s) Oral Daily	15	70	F	130	1.6	50.7812	NO	AUGMENTIN	NO	NONE	NONE	NONE	NONE	NONE	RIVA	NO	DM, HTN, HYPOTHYROIDISM, AFIB, …	11	19	50	24.52	9.82	63	176.543	NONE	NONE	NONE	NONE	NONE	0	0	0	0	0	1	1	0	0	0	1		NONE	NONE
00-17-15-32	rivaroxaban 15 mg / 1 tab(s) Oral Daily	15	70	M	79.9	1.66	28.9955	NO	NKA	Yes	2013	DVT	NONE	NONE	NONE	RIVA	None	DVT 7 YEARS AGO, RECURRENT LOWER GI BLLEDING , HTN, BEPATITIS B	26	18	74	39.06	8.99	90	75.9543	NONE	NONE	NONE	NONE	NONE	0	0	0	0	0	1	0	0	0	0	0		NONE	NONE
00-02-59-54	rivaroxaban 15 mg / 1 tab(s) Oral QPM	15	70	F	69	1.52	29.865	NO	NKA	NO	NONE	NONE	NONE	NONE	NONE	RIVA	NO	DM, HTN, OLD STROKE, AFIB, CKD STAGE II	13	11	75	31.73	2.81	150	39.3556	NONE	NONE	NONE	NONE	NONE	0	0	0	0	0	1	1	1	0	0	1		NONE	NONE
00-83-04-15	rivaroxaban 15 mg/ 1 tab(s) Oral Daily	15	70	M	88.3	1.613	33.9384	NO	NKA	NO	NONE	NONE	NONE	NONE	NONE	RIVA	ASA	T2DM, HTN, CKD, IHD, PAROX,AFIB,	21	18	58	38.12	12.23	113	66.8545	NONE	NONE	NONE	NONE	NONE	0	0	0	0	0	1	0	1	0	0	1		NONE	NONE
00-08-80-22	rivaroxaban 15 mg/ 1 tab(s) Oral Daily	15	70	M	80	1.63	30.1103	NO	NKA	NO	NONE	NONE	NONE	NONE	NONE	RIVA	NO	DM, AFIB, PATIENT WAS DEVELOPED SEVERE EPISTAXIS ONE MONTH AGO (9-2017) SEEN IN ALQASSIM HOSPITAL AND STOPPED RIVAROXABAN AND PRESCRIBED APIXIBAN AFTER THE PATIENT DEVELOPED SEVERE ALLERGIC REACTION TO IT SO THE STOPPED AND PRESCRIBE ASA	20	14	79	37.64	13.15	76	90.0585	NONE	NONE	NONE	NONE	NONE	0	0	0	0	0	0	0	0	1	1	0		NONE	NONE
00-77-48-02	rivaroxaban 15 mg/ 1 tab(s) Oral Daily	15	70	M	60	1.6	23.4375	YES	NKA	NO	NONE	NONE	NONE	NONE	NONE	RIVA	NO	IHD, ICMP, LV THROMBUS	25	17	66	38.75	5.87	89	57.6779	NONE	NONE	NONE	NONE	NONE	0	0	0	0	0	0	0	0	0	0	0		NONE	NONE
10-18-30-64	20 mg daily	20	70	female	85.7	1.55	35.6712	NO	NKA	no			yes			rivaroxaban	None	BA, HF, DM, HTN, Afib	15	21	83	33.49	6.47	66	111.093	NONE	0.22	NONE	NONE	NONE	0	0	0	0	0	1	0	0	0	1	1		NONE	NONE
01-10-91-07	20 mg daily	20	70	female	39	1.49	17.5668	NO	NKA	yes		PE	no			rivaroxaban	None	anxiety, BA, PE, bedridden	11	23	136	12.97	11.45	34	98.1373	NONE	NONE	NONE	NONE	NONE	0	0	0	0	0	1	0	1	0	0	1		NONE	NONE
02-30-58-91	20 mg daily	20	70	male	77	1.65	28.2828	NO	NKA	no			no			rivaroxaban	aspirin, 81 mg, Oral, Daily	DM, HTNm IHD, BPH, OA, GERD	12.2	13.6	68	45.4	8.8	80	82.3472	NONE	NONE	NONE	NONE	NONE	0	0	0	0	0	1	0	0	0	0	1		NONE	NONE
10-24-42-00	20 mg daily	20	70	female	79	1.58	31.6456	NO	NKA	no			yes			rivaroxaban	None	DM, HTN, Afib	18	15	64	34.5	6.1	81	83.4431	NONE	NONE	NONE	NONE	NONE	0	0	0	0	0	1	0	0	0	0	1		NONE	NONE
10-16-91-31	20 mg daily	20	70	male	91	1.62	34.6746	NO	NKA	no			yes			rivaroxiban	None	CABG, CAD, DM, Afib	29	18	68	29.94	9.35	123	63.2972	NONE	NONE	NONE	NONE	NONE	0	0	0	0	0	0	0	0	0	0	1		NONE	NONE
10-18-12-04	20 mg daily	20	70	female	84	1.5	37.3333	NO	NKA	no			yes			rivaroxaban	None	HF, AKI, Afib	34	27	131	35.5	18.28	88	81.6667	NONE	NONE	NONE	NONE	NONE	0	0	0	0	0	0	1	0	0	1	0		NONE	NONE
02-23-67-36	20 mg daily	20	70	male	105	1.67	37.6493	NO	NKA	yes	43652	provoked DVT	no			rivaroxaban	aspirin, 81 mg, Oral, Daily	SLE, DVT, HTN, Renal impairment, BPH	18	23	86	40	6.19	130	69.1026	NONE	NONE	NONE	NONE	NONE	0	0	0	0	0	0	0	0	1	0	0		NONE	NONE
02-57-22-30	20 mg daily	20	70	male	80	1.6	31.25	NO	NKA	no			None			rivaroxaban	None		43	43	84	38.75	5.86	99	69.1358	NONE	NONE	NONE	NONE	NONE	0	0	0	0	0	0	1	0	0	0	0		NONE	NONE
10-20-61-21	20 mg daily	20	70	female	61	1.54	25.721	NO	NKA	no			yes		chronic AF	rivaroxaban	None	HTN, RHD, post MVR + TVR, DLD, GERD, chronic AF, post ischemic stroke	25	18	89	31.83	8.07	107	48.7747	NONE	NONE	NONE	NONE	NONE	0	0	0	0	0	1	0	0	0	0	0		NONE	NONE
00-95-69-71	20 mg daily	20	70	female	75	1.56	30.8185	NO	NKA	yes		lower limbs DVT	no			rivaroxaban	None	epilepsy, DVT	13	22	278	15	6.07	19	337.719	NONE	NONE	NONE	NONE	NONE	0	0	0	1	0	0	0	0	0	0	0		NONE	NONE
10-06-47-19	20 mg daily	20	70	male	64	1.64	23.7954	NO	NKA	no			yes		PAF	rivaroxaban	aspirin, 81 mg, Oral, Daily	HTN, DM, PVD, ICMP with severe LV dysfunction, PAF	48	13	127	30.66	6.08	127	43.1146	NONE	NONE	NONE	NONE	NONE	0	0	0	0	0	0	0	0	0	0	0		NONE	NONE
10-14-42-20	20 mg oral daily	20	70	female	80	1.6	31.25	NO	NKA	yes		PE	no			rivaroxiban	None	SOB,HTN,TB, Lung fibrosis	17	14	99	33.7	4.87	52	131.624	NONE	NONE	NONE	NONE	NONE	0	0	0	0	0	1	0	1	0	0	0		NONE	NONE
10-16-34-06	20 mg oral daily	20	70	female	81	1.57	32.8614	NO	NKA	no			yes		a-fib	rivaroxiban	None	HTN,AF,ASTHMA	24	27	111	33.42	10.84	56	123.75	NONE	NONE	NONE	NONE	NONE	0	0	0	0	0	1	0	0	0	0	0		NONE	NONE
01-14-71-65	20 mg oral tablet, 1 tab(s), Oral, qPM	20	70	male	90	1.6	35.1562	NO	NKA	yes		DVT	yes		A-fib	rivaroxiban	None	DM,HTN,IHD,A-FIB,GOUT	21	11	97	37.2	12.3	111	69.3694	NONE	NONE	NONE	NONE	NONE	0	0	0	0	0	0	0	0	0	1	1		NONE	NONE
10-11-88-68	20 mg oral tablet, 1 tab(s), Oral, qPM	20	70	female	104	1.6	40.625	NO	NKA	no			yes		a-fib	rivaroxiban	None	AVR,HTN,AFIB,	32	14	99	36.6	11.06	56	158.889	NONE	NONE	NONE	NONE	NONE	0	0	0	0	0	1	0	0	0	1	0		NONE	NONE
00-89-96-95	20 mg oral tablet, 20 mg, Oral, Daily	20	70	female	81.3	1.57	32.9831	NO	NKA	no			yes			rivaroxaban	None	DM, HTN	47	27	130	34.84	14.69	41	169.65	NONE	NONE	NONE	NONE	NONE	0	0	0	0	0	1	0	0	0	0	1		NONE	NONE
00-89-05-18	20 mg qPM	20	70	female	121.6	1.565	49.6484	NO	NKA	no			no			rivaroxaban	aspirin, 81 mg, Oral, Daily	HTN, HF, DLD, hypothyrodism, obesity	53	24	151	38	24.12	59	176.331	NONE	NONE	NONE	NONE	NONE	0	0	0	0	0	1	0	0	0	1	0		NONE	NONE
00-11-10-51	rivaroxaban 20 mg/ 1 tab(s) Oral Daily	20	70	F	70	1.602	27.2755	NO	NKA	NO	NONE	NONE	NONE	NONE	NONE	RIVA	ASA	DM, BA, HTN, DLD, CHRONIC AFIB	38	19	76	40.53	10.66	49	122.222	NONE	NONE	NONE	NONE	NONE	0	0	0	0	0	0	1	0	0	0	1		NONE	NONE
00-43-08-40	rivaroxaban 20 mg/ 1 tab(s) Oral Daily	20	70	F	74	1.45	35.1962	NO	EGGPLANT, TOMATO	NO	NONE	NONE	NONE	NONE	NONE	RIVA	ASA	T2DM, HTN, STROKE, PSYCHIATRIC DISORDER	26	19	75	35.84	4.09	144	43.966	NONE	NONE	NONE	NONE	NONE	0	0	0	0	0	1	0	0	0	0	1		NONE	NONE
00-38-36-40	rivaroxaban 20 mg/ 1 tab(s) Oral Daily	20	70	M	76	1.65	27.9155	NO	NKA	NO	NONE	NONE	NONE	NONE	NONE	RIVA	ASA	T2DM, HTN, IHD, PCI BEFORE MORE THAN 15 YEARSGERD, POST LAPROTOMY MORE THAN 10 YEARS WITH SPLEENECTOMY , UMBILICAL HERNIA REPAIR MORE THAN 10 YEARS AGO.	29	9	85	34.57	5.61	77	84.4444	NONE	NONE	NONE	NONE	NONE	0	0	0	0	0	1	0	0	0	0	1		NONE	NONE
00-69-72-23	rivaroxaban 20 mg/ 1 tab(s) Oral Daily	20	70	F	99	1.58	39.6571	NO	NKA	NO	NONE	NONE	NONE	NONE	NONE	RIVA	NO	HTN, DM, OBESITY, PAROX. AFIB	24	18	98	34.94	7.24	62	136.613	NONE	NONE	NONE	NONE	NONE	0	0	0	0	0	1	0	0	0	0	1		NONE	NONE
00-83-74-15	rivaroxaban 20 mg/ 1 tab(s) Oral Daily	20	70	F	72	1.56	29.5858	NO	NKA	NO	NONE	NONE	NONE	NONE	NONE	RIVA	NO	AFIB, DM, HTN	25	17	109	35.17	11.81	85	72.4706	NONE	NONE	NONE	NONE	NONE	0	0	0	0	0	1	0	0	0	0	1		NONE	NONE
00-63-32-88	rivaroxaban 20 mg/ 1 tab(s) Oral Daily	20	70	F	81.3	1.56	33.4073	NO	NKA	NO	NONE	NONE	NONE	NONE	NONE	RIVA	ASA	DM, INVASIVE LEFT ATRIAL MASS EXCISION IN 2017, ROSACEA,	19	14	94	38.17	6.66	57	122.029	NONE	NONE	NONE	NONE	NONE	0	0	0	0	0	0	0	0	0	0	1		NONE	NONE
00-37-18-06	rivaroxaban 20 mg/ 1 tab(s) Oral Daily	20	70	M	71.5	1.6	27.9297	NO	NKA	Yes	2016	PE	NONE	NONE	NONE	RIVA	ASA	DM, DYSPNEA, PEPTIC ULCER, PATIENT DEVELOPED PE IN 2016 STARTED ON HEPARIN INFUSION THEN ENOXA THEN RIVA	31	54	78	37.6	13.58	74	82.6652	NONE	NONE	NONE	NONE	NONE	0	0	0	0	0	1	0	0	1	1	0		NONE	NONE
00-27-75-87	rivaroxaban 20 mg/ 1 tab(s) Oral Daily	20	70	M	69	1.66	25.0399	YES	NKA	NO	NONE	NONE	NONE	NONE	NONE	RIVA	ASA	DM, ICMP, SEVERE LV DYSFUNCTION, IHD	24	29	84	37.08	7.62	115	51.3333	NONE	NONE	NONE	NONE	NONE	0	0	0	1	0	0	0	0	0	0	0		NONE	NONE
00-03-79-47	rivaroxaban 20 mg/ 1 tab(s) Oral Daily	20	70	F	79	1.56	32.4622	NO	NKA	NO	NONE	NONE	NONE	NONE	NONE	RIVA	NO	RA, OA, OSTEOPOROSIS, MS, AFIB, LA THROMBUS ON WARFARIN	17	19	73	36.55	19.68	68	99.3954	NONE	NONE	NONE	NONE	NONE	0	0	0	0	0	0	0	0	0	0	0		NONE	NONE
00-76-28-98	rivaroxaban 20 mg/ 1 tab(s) Oral Daily	20	70	F	124	1.6	48.4375	NO	NKA	NO	NONE	NONE	NONE	NONE	NONE	RIVA	NO	AFIB, VENRICULAR TACHYCARDIA, PCI, OA	35	14	99	34	12	85	124.81	NONE	NONE	NONE	NONE	NONE	0	0	0	0	0	0	0	0	0	0	0		NONE	NONE
01-01-62-15	10 mg daily	10	71	female	84.7	1.54	35.7143	NO	NKA	no			no			rivaroxaban	None	OA, DLP, TKR	35	44	55	24.4	5.96	58	123.156	NONE	NONE	NONE	NONE	NONE	0	0	0	0	0	1	1	1	1	0	1		NONE	NONE
01-19-73-95	10 mg daily	10	71	male	73	1.7	25.2595	NO	NKA	no			no			rivaroxaban	None	TKR, HTN, DM, DLD, Impaired vision	27.5	27	90	47.7	8.7	90	68.4037	NONE	NONE	NONE	NONE	NONE	0	0	0	0	0	1	1	0	0	0	1		NONE	NONE
10-07-01-04	10 mg daily	10	71	female	89.6	1.56	36.8179	NO	NKA	no			no			rivaroxaban	None	HTN, DM, TKR	20	14	101	25	7.77	72	104.948	NONE	NONE	NONE	NONE	NONE	0	0	0	0	0	1	0	0	0	0	1		NONE	NONE
01-05-06-82	10 mg daily	10	71	male	99	1.67	35.4979	NO	NKA	no			no			rivaroxaban	None	DM, IHD, Peripheral artery disease	15	14	97	30.11	3.71	76	109.855	NONE	NONE	NONE	NONE	NONE	0	0	0	0	0	1	0	0	0	0	1		NONE	NONE
10-23-20-83	10 mg daily	10	71	male	58	1.585	23.0871	NO	NKA	no			no			rivaroxaban	None	DM, HTN, Multiple myeloma	27	25	54	34.48	19.27	64	76.4271	NONE	NONE	NONE	NONE	NONE	0	0	0	0	0	1	0	0	0	0	1		NONE	NONE
00-98-11-40	10 mg daily	10	71	female	83.5	1.52	36.1409	NO	NKA	no			no			rivaroxaban	None	DLP, HTN, Irritable bowel syndrome, TKR	31	24	125	22	7.67	69	102.056	NONE	NONE	NONE	NONE	NONE	0	0	0	0	0	0	1	0	0	0	0		NONE	NONE
01-14-00-82	10 mg daily	10	71	male	106	1.8	32.716	no	NKA	yes	2016	left lower limb DVT + PE	no			rivaroxaban	aspirin, 81 mg, Oral, Daily	RA, HTN, DM, DVT, PE	35	14	99	34	12	85	105.169	NONE	NONE	NONE	NONE	NONE	0	0	0	0	0	0	0	0	0	0	0		NONE	NONE
01-03-25-22	10 mg for 21 days	10	71	female	57.6	1.45	27.396	NO	NKA	no			no			rivaroxaban	None	HTN, DM	17	22	47	26.87	9.72	31	156.697	NONE	NONE	NONE	NONE	NONE	0	0	0	0	0	0	0	0	0	0	0		NONE	NONE
00-90-26-61	10 mg, Oral, Daily	10	71	female	83.5	1.47	38.6413	NO	NKA	no			no			rivaroxaban	None	Dm, HTN, TKR	57	49	64	24.05	14.1	78	90.2799	NONE	NONE	NONE	NONE	NONE	0	0	0	0	0	1	0	0	0	0	1		NONE	NONE
00-44-90-32	rivaroxaban 10 mg/ 1 tab(s) Oral Daily	10	71	M	50	1.65	18.3655	NO	NKA	NO	NONE	NONE	NONE	NONE	NONE	RIVA	ASA	DM, HTN, PREVIOUS STROKE TWICE, AFIB, CKD,	9	10	78	34.69	18.49	87	48.4674	NONE	NONE	NONE	NONE	NONE	0	0	0	0	0	1	0	1	0	0	1		NONE	NONE
00-83-25-58	rivaroxaban 10 mg/ 1 tab(s) Oral Daily	10	71	M	74.7	1.75	24.3918	NO	NKA	NO	NONE	NONE	NONE	NONE	NONE	RIVA	NO	OA, DM, HTN, FIX OF TIBIA & FIBULA	35	14	99	34	12	85	74.1141	NONE	NONE	NONE	NONE	NONE	0	0	0	0	0	1	0	0	0	0	1		NONE	NONE
00-14-41-68	rivaroxaban 10 mg/ 1 tab(s) Oral Daily	10	71	F	69	1.42	34.2194	NO	NKA	NO	NONE	NONE	NONE	NONE	NONE	RIVA	NO	HYPOTHYROIDISM, OA, BILATERAL KNEE REPLACEMENT	24	15	91	38.58	7.05	56	103.911	NONE	NONE	NONE	NONE	NONE	0	0	0	0	0	1	1	0	0	0	0		NONE	NONE
00-83-59-02	rivaroxaban 10 mg/ 1 tab(s) Oral Daily	10	71	F	55	1.53	23.4952	NO	NKA	NO	NONE	NONE	NONE	NONE	NONE	RIVA	NO	TKR, HTN	35	14	99	34	12	85	54.5686	NONE	NONE	NONE	NONE	NONE	0	0	0	0	0	1	0	0	0	0	0		NONE	NONE
00-84-23-20	rivaroxaban 10 mg/ 1 tab(s) Oral Daily	10	71	F	96	1.52	41.5512	NO	NKA	Yes	2011	DVT	NONE	NONE	NONE	RIVA	NO	SJOGREN SYNDROM, LL DVT, CEREBREAL SINUS THROMBOSIS IN 2007, RETINAL VEIN THROMBOSIS 2008, CARDIAC CATHERIZATION , OA, IDA	23	22	190	30.21	5.7	50	161.92	NONE	NONE	NONE	NONE	NONE	0	0	0	0	0	0	0	0	0	0	0		NONE	NONE
00-60-57-16	rivaroxaban 10 mg/ 1 tab(s) Oral Daily	10	71	M	88	1.69	30.8112	NO	NKA	Yes	?	DVT	NONE	NONE	NONE	RIVA	NO	RECURRENT COLORECTAL CA TREATMENT, DVT ON ENOXA, BPH	25	20	77	38.85	9.96	88	84.3333	NONE	NONE	NONE	NONE	NONE	0	0	0	0	0	0	0	0	0	0	0		NONE	NONE
02-45-81-63	15 mg daily	15	71	female	73	1.55	30.385	NO	NKA	no			yes			rivaroxaban	None	DM, DLD, HFpEF, Afib, CKD, HTN	24	26	155	37.88	14.42	174	35.3812	NONE	NONE	NONE	NONE	NONE	0	0	0	0	0	1	1	0	0	1	1		NONE	NONE
10-08-21-96	15 mg daily	15	71	female	100	1.55	41.6233	NO	NKA	yes		PE	no			rivaroxaban	aspirin, 81 mg, Oral, Daily	HTN, DLD, seizure, PE	121	69	100	25	3.56	58	145.402	NONE	NONE	NONE	NONE	NONE	0	0	0	0	0	1	0	0	0	0	1		NONE	NONE
10-24-76-85	15 mg daily	15	71	male	74.6	1.66	27.0721	smoking cesstion for 40 years ago	NKA	no			no			rivaroxaban	None	DM, IHD, hernia repair	26	15	142	33.26	5.12	124	50.736	NONE	NONE	NONE	NONE	NONE	0	0	0	0	0	0	0	0	0	0	1		NONE	NONE
01-05-56-72	15 mg daily	15	71	female	107	1.7	37.0242	NO	NKA	yes		DVT	no			rivaroxaban	aspirin, 81 mg, Oral, Daily	DVT	20	12	40	40.16	9.65	131	68.883	NONE	NONE	NONE	NONE	NONE	0	0	0	0	0	0	0	0	0	0	0		NONE	NONE
01-20-62-17	15 mg daily	15	71	male	80	1.7	27.6817	NO	NKA	no			yes			rivaroxaban	None	Afib, Cardiac defibrillator in situ, Dilated cardiomyopathy, ICD insertion	101	100	217	20.41	12.83	83	81.2851	NONE	NONE	NONE	NONE	NONE	0	0	0	0	0	0	0	0	0	0	0		NONE	NONE
01-18-68-90	15 mg oral qpm	15	71	male	85.2	1.78	26.8905	NO	NKA	no			no			rivaroxiban	None	IHD,DM,DLP,HTN	80	66	91	25.45	25.18	110	65.32	NONE	NONE	NONE	NONE	NONE	0	0	0	0	0	1	1	1	0	0	1		NONE	NONE
01-14-67-33	15 mg oral tablet, 1 tab(s), Oral, qPM	15	71	male	54	1.6	21.0937	NO	NKA	no			no			rivaroxiban	aspirin 81 oral daily	HF,DM,HTN,LV THROMBOS,IHD,	316	327	348	23.17	197.25	246	18.5122	NONE	NONE	NONE	NONE	NONE	0	0	0	0	0	1	0	0	0	0	1		NONE	NONE
00-10-49-94	rivaroxaban 15 mg / 1 tab(s) Oral Daily	15	71	F	86.7	1.555	35.8557	NO	NKA	NO	NONE	NONE	NONE	NONE	NONE	RIVA	ASA	DM, HYPOTHYROIDISM, ISCHEMIC STROKE WITH SECONDARY SEIZURE , IHD, MODERATE LVSD, AFIB POST CARDIAC SURGERY	20	14	82	33.87	4.65	89	82.1539	NONE	NONE	NONE	NONE	NONE	0	1	0	0	0	1	1	0	0	1	1		NONE	NONE
00-62-60-38	rivaroxaban 15 mg / 1 tab(s) Oral Daily	15	71	M	94	1.7	32.526	NO	NKA	NO	NONE	NONE	NONE	NONE	NONE	RIVA	ASA	HTN, DM, AFIB, CKD,	21	23	269	26.8	13.07	259	30.6075	NONE	NONE	NONE	NONE	NONE	0	0	0	0	0	1	0	1	0	0	1		NONE	NONE
00-52-02-09	rivaroxaban 15 mg / 1 tab(s) Oral Daily	15	71	F	66	1.56	27.1203	NO	NKA	NO	NONE	NONE	NONE	NONE	NONE	RIVA	ASA	AFIB, HTN, T2DM, HYPOTHYROIDISM , CAD	35	14	99	34	12	85	65.4824	NONE	NONE	NONE	NONE	NONE	0	0	0	0	0	1	1	0	0	0	1		NONE	NONE
00-04-97-55	rivaroxaban 15 mg / 1 tab(s) Oral Daily	15	71	F	47	1.45	22.3543	NO	NKA	Yes	OLD	DVT	NONE	NONE	NONE	RIVA	NO	DM, AFIB, OLD LEFT LIMB DVT, PNEUMONIA, BED SORE, TRACHEOSTOMY, SEVERE AS WITH SEVERE LV DYSFUNCTION	35	14	99	34	12	85	46.6314	NONE	NONE	NONE	NONE	NONE	0	0	0	0	0	1	1	1	0	1	0		NONE	NONE
00-54-80-80	rivaroxaban 15 mg / 1 tab(s) Oral Daily	15	71	M	45.3	1.65	16.6391	NO	NKA	NO	NONE	NONE	NONE	NONE	NONE	RIVA	NO	BPH, HTN, AFIB, CKD, EPILEPSY, HIP REPLACEMENT , MITRAL VALVE REPAIR, NEUROGENIC BLADDER, RHEUMATIC HEART DISEASE,	19	54	222	19.44	10.24	94	40.6415	NONE	NONE	NONE	NONE	NONE	0	0	0	0	0	0	0	0	1	0	0		NONE	NONE
00-06-68-60	rivaroxaban 15 mg / 1 tab(s) Oral QPM	15	71	M	93.4	1.69	32.7019	NO	COTTON CLOTH, EGG, BANANA, FOUL, LENTILE, FISH, POT.DICHROMATE, EGG CONTAINING COMPOUND	NO	NONE	NONE	NONE	NONE	NONE	RIVA	NO	AFIB, BPH, COLON CA, DM, CVA, HTN,	33	17	67	37.98	5.95	139	56.6671	NONE	NONE	NONE	NONE	NONE	0	0	0	0	0	0	0	0	0	0	1		NONE	NONE
00-36-45-56	rivaroxaban 15 mg / 1 tab(s) Tab Oral qPM	15	71	M	90	1.79	28.089	NO	Iodine	NO	NONE	NONE	None	None	None	Rivaroxaban	Aspirin/Clopidogril	DM, HTN, IHD ON 2001, RECURRENT PE on 2007-2008 was on warfarin and switched on Rivaroxaban	109	51	100	33.86	8.34	109	69.633	None	None	None	None	None	0	0	0	0	0	1	1	0	1	1	1		NONE	NONE
01-14-67-33	rivaroxaban 15 mg / 1 tab(s) Tab Oral qPM	15	71	M	54	1.68	19.1327	NO	NKA	NO	NONE	NONE	None	None	None	Rivaroxaban	Aspirin	HTN, BA, HFrEF, DM, IHD	158	251	172	29.14	79.86	138	33	None	None	None	None	None	0	0	0	0	0	1	1	1	0	1	1		NONE	NONE
00-77-56-21	rivaroxaban 15 mg/ 1 tab(s) Oral Daily	15	71	F	110	1.58	44.0635	NO	CONCOR, NATRLIX	NO	NONE	NONE	NONE	NONE	NONE	RIVA	ASA	DM, HTN, HFPEF, MORBID OBESITY, CKD, DLD, OSTEOPENIA, MITRAL REGURGITATION	35	14	99	34	12	85	109.137	NONE	NONE	NONE	NONE	NONE	0	0	0	0	0	0	1	0	0	1	1		NONE	NONE
00-00-10-97	rivaroxaban 15 mg/ 1 tab(s) Oral Daily	15	71	F	85	1.63	31.9922	NO	NKA	NO	NONE	NONE	NONE	NONE	NONE	RIVA	NO	BILATERAL KNEE OA, HTN,	25	21	78	35.92	3.71	94	76.2589	NONE	NONE	NONE	NONE	NONE	0	0	0	0	0	1	0	0	0	0	0		NONE	NONE
10-04-32-99	20 mg daily	20	71	male	80	1.75	26.1224	NO	NKA	no			yes		Atrial flutter	rivaroxaban	None	DM Afib	33	18	69	34	9.4	78	86.4957	NONE	NONE	NONE	NONE	NONE	0	0	0	0	0	1	1	0	0	1	1		NONE	NONE
10-19-55-33	20 mg daily	20	71	female	89.9	1.55	37.4194	NO	NKA	no			yes			rivaroxaban	None	DM, HTN, Afib, ischemic stroke, Severe MR & moderate TR	20	17	106	32.23	5.38	25	303.263	NONE	NONE	NONE	NONE	NONE	0	0	0	0	0	1	0	0	0	0	1		NONE	NONE
01-19-20-44	20 mg daily	20	71	male	80	1.78	25.2493	NO	NKA	no			yes			rivaroxaban	None	DM, Afib, IHD, DLP, stroke, LVSD	46	40	0	38.11	11.6	139	48.5372	NONE	NONE	NONE	NONE	NONE	0	0	0	0	0	1	0	0	0	0	0		NONE	NONE
10-18-01-88	20 mg daily	20	71	female	103.5	1.66	37.5599	NO	NKA	yes		PE	no			rivaroxaban	None	PE	13	10	74	27.51	8.48	49	178.133	NONE	6.5	NONE	NONE	NONE	0	0	0	0	0	0	0	0	0	0	0		NONE	NONE
01-20-81-10	20 mg daily	20	71	male	69	1.74	22.7903	NO	NKA	no			yes		valvular A Fib	rivaroxaban	None	MVR, valvular A Fib	35	14	99	34	12	121	48.0909	NONE	NONE	NONE	NONE	NONE	0	0	0	0	0	0	0	0	0	0	0		NONE	NONE
10-15-10-61	20 mg oral daily	20	71	female	78	1.65	28.6501	NO	penicillin	no			no			rivaroxiban	aspirin 81 mg	DM,HTN,DLD,LVH	22	20	115	32.61	3.41	57	115.404	NONE	NONE	NONE	NONE	NONE	0	0	0	0	0	1	1	0	0	0	1		NONE	NONE
00-93-88-31	20 mg oral tablet, 1 tab(s), Oral, qPM	20	71	female	65	1.545	27.2305	NO	NKA	no			no			Rivaroxaban	None	DM,HTN,Dyslipidemia	18	0	0	38.6	3.52	64	85.651	NONE	NONE	NONE	NONE	NONE	0	0	0	0	0	1	0	0	0	1	1		NONE	NONE
00-96-65-38	20 mg oral tablet, 1 tab(s), Oral, qPM	20	71	male	84.5	1.69	29.5858	NO	NKA	no			yes			rivaroxaban	None	FDM, HTN, Afib	21	21	53	41.91	8.86	73	97.6187	NONE	NONE	NONE	NONE	NONE	0	0	0	0	0	1	0	0	0	0	1		NONE	NONE
10-13-51-25	20 mg oral tablet, 1 tab(s), Oral, qPM	20	71	female	83	1.56	34.1059	NO	NKA	yes		PE	yes		a-fib	rivaroxiban	None	HTN,AFIB,PE,SOB,	52	24	81	30.3	9.5	40	174.992	NONE	NONE	NONE	NONE	NONE	0	0	0	0	0	1	0	0	0	0	0		NONE	NONE
10-13-23-53	20 mg oral tablet, 1 tab(s), Oral, qPM	20	71	female	77.5	1.56	31.8458	NO	NKA	yes		DVT	no			rivaroxiban	None	HTN,DVT	26	19	97	37.55	4.17	71	92.054	NONE	NONE	NONE	NONE	NONE	0	0	0	0	0	0	0	0	0	0	0		NONE	NONE
00-31-81-99	rivaroxaban 20 mg/ 1 tab(s) Oral Daily	20	71	M	91.2	1.6	35.625	NO	NKA	NO	NONE	NONE	NONE	NONE	NONE	RIVA	NO	HYPOTHYROIDISM, HTN, DM, DLD, IHD, BA, GERD, OSA, OBESE	32	20	99	36.98	7.7	56	137.343	NONE	NONE	NONE	NONE	NONE	0	0	0	0	0	0	0	1	0	0	1		NONE	NONE
00-79-52-40	rivaroxaban 20 mg/ 1 tab(s) Oral Daily	20	71	F	84.9	1.58	34.009	NO	NKA	NO	NONE	NONE	NONE	NONE	NONE	RIVA	ASA	T2DM, HTN, DLD, OA, ACUTE ISCHEMIC STROKE, NEW ONSET AFIB	17	14	88	39.39	17.57	79	90.6316	NONE	NONE	NONE	NONE	NONE	0	0	0	0	0	1	1	0	0	0	1		NONE	NONE
00-48-05-19	rivaroxaban 20 mg/ 1 tab(s) Oral Daily	20	71	M	61	1.64	22.68	NO	NKA	NO	NONE	NONE	NONE	NONE	NONE	RIVA	ASA	HYPOTHYROIDISM, DM, AFIB,	31	13	92	38.59	9.86	88	58.4583	NONE	NONE	NONE	NONE	NONE	0	0	0	0	0	1	1	0	0	0	1		NONE	NONE
00-41-42-23	rivaroxaban 20 mg/ 1 tab(s) Oral Daily	20	71	F	51	1.51	22.3674	NO	ATARAX	NO	NONE	NONE	NONE	NONE	NONE	RIVA	NO	DM. AFIB, HCV, DLD, HEPATITIS C, HTN	35	14	99	34	12	85	50.6	NONE	NONE	NONE	NONE	NONE	0	0	0	0	0	1	1	0	0	0	1		NONE	NONE
00-82-00-20	rivaroxaban 20 mg/ 1 tab(s) Oral Daily	20	71	F	85.5	1.64	31.7891	NO	INSULIN GLARGINE	NO	NONE	NONE	NONE	NONE	NONE	RIVA	ASA	HTN, DM, DVT , CHOLECYSTECTOMY	35	14	99	34	12	85	84.8294	NONE	NONE	NONE	NONE	NONE	0	0	0	0	0	1	0	0	0	0	1		NONE	NONE
00-73-37-81	rivaroxaban 20 mg/ 1 tab(s) Oral Daily	20	71	F	61	1.47	28.229	NO	NKA	NO	NONE	NONE	NONE	NONE	NONE	RIVA	NO	HTN, DLD, UNPROVOKED DVT,	18	11	82	34.92	4.91	46	111.833	NONE	NONE	NONE	NONE	NONE	0	0	0	0	0	1	1	0	0	0	0		NONE	NONE
00-25-14-97	rivaroxaban 20 mg/ 1 tab(s) Oral Daily	20	71	M	72	1.7	24.9135	NO	NKA	NO	NONE	NONE	NONE	NONE	NONE	RIVA	NO	HTN. AFIB	35	14	99	34	12	85	71.4353	NONE	NONE	NONE	NONE	NONE	0	0	0	0	0	1	0	0	0	0	0		NONE	NONE
00-70-85-85	rivaroxaban 20 mg/ 1 tab(s) Oral Daily	20	71	M	61	1.59	24.1288	NO	NKA	NO	NONE	NONE	NONE	NONE	NONE	RIVA	NO	HTN, ANEXIETY , AFIB, SCLERODERMA, DILATED CARDIOMYOPATHY	35	14	99	34	12	85	60.5216	NONE	NONE	NONE	NONE	NONE	0	0	0	0	0	1	0	0	0	0	0		NONE	NONE
00-83-04-73	rivaroxaban 20 mg/ 1 tab(s) Oral Daily	20	71	F	74	1.58	29.6427	NO	ASA, MANGO, PENICILLIN	NO	NONE	NONE	NONE	NONE	NONE	RIVA	None	BREAST CA, ANEMIA, HTN, ANEMIA, STEROID INDUCED DIABESTES, BILATERAL TKE	15	10	63	33.97	5.98	87	71.7318	NONE	NONE	NONE	NONE	NONE	0	0	0	0	0	1	0	0	0	0	0		NONE	NONE
00-75-84-40	rivaroxaban 20 mg/ 1 tab(s) Oral Daily	20	71	F	194	1.58	77.7119	NO	NKA	NO	NONE	NONE	NONE	NONE	NONE	RIVA	NO	STROKE, MORBID OBESITY, BA DVT, PE, STROKE, AFIB, BREAST CANCER	35	14	99	34	12	85	192.478	NONE	NONE	NONE	NONE	NONE	0	0	0	0	0	0	0	0	0	0	0		NONE	NONE
00-02-15-16	rivaroxaban 15 mg/ 1 tab(s) Oral BID	30	71	F	88.9	1.49	40.0432	NO	NKA	NO	NONE	NONE	NONE	NONE	NONE	RIVA	ASA	HF, PE,DVT, DM, AKI, DLD, HTN, GOUT	30	17	132	34.15	7.65	106	70.7286	NONE	NONE	NONE	NONE	NONE	0	0	0	0	0	1	0	0	0	1	1		NONE	NONE
10-23-40-20	10 mg daily	10	72	female	65	1.72	21.9713	NO	NKA	no			no			rivaroxaban	None	history of fracture, DM, HTN	21	11	134	34.2	4.8	91	59.3651	NONE	NONE	NONE	NONE	NONE	0	0	0	0	0	1	0	0	0	0	1		NONE	NONE
10-04-32-60	10 mg daily	10	72	male	82	1.66	29.7576	NO	NKA	no			no			rivaroxaban	None	TKR, HTN	14	24	47	28.33	7.44	72	94.6543	NONE	NONE	NONE	NONE	NONE	0	0	0	0	0	0	0	0	0	0	1		NONE	NONE
00-96-66-27	10 mg daily for 14 days	10	72	female	73	1.68	25.8645	NO	NKA	no			no			rivaroxaban	None	HTN, asthma, R breast cancer s/p mastectomy	28	17	53	39.07	6.96	64	94.7986	NONE	NONE	NONE	NONE	NONE	0	0	0	0	0	1	0	0	0	0	1		NONE	NONE
00-04-52-59	rivaroxaban 10 mg/ 1 tab(s) Oral Daily	10	72	F	60	1.4	30.6122	NO	NKA	NO	NONE	NONE	NONE	NONE	NONE	RIVA	ASA	SHE RECEIVED MEDICATION FOR ONE MONTH AFTER CLAW TOES CORRECTION	18	20	75	36.14	6.61	49	101.769	NONE	NONE	NONE	NONE	NONE	0	0	0	0	0	0	0	0	0	0	0		NONE	NONE
00-45-86-63	rivaroxaban 10 mg/ 1 tab(s) Oral Daily	10	72	F	86	1.45	40.9037	NO	NKA	NO	NONE	NONE	NONE	NONE	NONE	RIVA	ASA	TKR, ANEXIETY	35	14	99	34	12	85	84.0889	NONE	NONE	NONE	NONE	NONE	0	0	0	0	0	0	0	0	0	0	0		NONE	NONE
00-18-93-28	rivaroxaban 10 mg/ 1 tab(s) Oral Daily	10	72	F	70.5	1.53	30.1166	NO	NKA	NO	NONE	NONE	NONE	NONE	NONE	RIVA	NO	IBS, RAMUS FREACTURE NON DISPLACED	35	14	99	34	12	85	68.9333	NONE	NONE	NONE	NONE	NONE	0	0	0	0	0	0	0	0	0	0	0		NONE	NONE
00-87-45-73	15 mg daily	15	72	female	53	1.43	25.9181	NO	NKA	no			yes			rivaroxaban	None	HTN, DM, osteoporosis	46	0	0	28.3	5.11	49	89.8957	NONE	NONE	NONE	NONE	NONE	0	0	0	0	0	1	0	0	0	0	1		NONE	NONE
10-08-20-63	15 mg daily	15	72	female	60	1.57	24.3418	NO	NKA	no			yes		atrial flutter	rivaroxaban	None	HTN, HF, hypothyrodism, subdural hematoma, left knee surgery, Af	38	21	205	25.37	13.47	94	53.0496	NONE	NONE	NONE	NONE	NONE	0	0	0	0	0	1	0	0	0	0	1		NONE	NONE
10-07-32-29	15 mg daily	15	72	male	64	1.56	26.2985	NO	NKA	no			yes		Atrail tachycardia	rivaroxaban	aspirin, 81 mg, Oral, Daily	IHD, DM, HTN, status post CABG, Atrail tachycardia	25	19	128	43.66	13.18	102	52.1481	NONE	NONE	NONE	NONE	NONE	0	0	0	0	0	0	0	0	0	0	0		NONE	NONE
10-15-49-47	15 mg oral daily	15	72	male	70	1.55	29.1363	NO	NKA	no			yes		a-fib	rivaroxiban	None	DM,HT,AF	36	45	133	18.38	24.69	93	62.5568	NONE	NONE	NONE	NONE	NONE	0	0	0	0	0	0	0	0	0	0	1		NONE	NONE
10-14-39-92	15 mg oral daily	15	72	female	58	1.5	25.7778	NO	NKA	yes		PE	NO			rivaroxiban	aspirin 81 mg	HTN,DEMNTIA,PE,HYPOTHYRODSIIM,BED BOUND	22	31	72	29.38	6.46	43	112.103	NONE	NONE	NONE	NONE	NONE	0	0	0	0	0	1	0	0	0	0	0		NONE	NONE
10-11-61-81	15 mg orally qpm	15	72	male	79.8	1.81	24.3582	NO	NKA	no			yes		A-fib	rivaroxiban	None	HTN,AFIB,NICMP	24	22	106	36.96	11.92	92	72.0899	NONE	NONE	NONE	NONE	NONE	0	0	0	0	0	1	0	0	1	0	0		NONE	NONE
10-11-66-62	15 mg orally qpm	15	72	female	115	1.63	43.2835	NO	NKA	no			no			rivaroxiban	None	TKR, HTN OBEESE	11	20	52	23.12	10.69	104	91.9017	NONE	NONE	NONE	NONE	NONE	0	0	0	0	0	0	0	0	0	0	0		NONE	NONE
00-89-55-02	15 mg, Oral, qPM	15	72	female	61.8	1.48	28.214	NO	red pepper	no			yes			rivaroxaban	None	Chronic rheumatic heart disease, atrial fibrillation	23	25	98	37.71	14.74	58	88.5563	NONE	NONE	NONE	NONE	NONE	0	0	0	0	0	0	0	0	0	0	0		NONE	NONE
00-28-11-97	rivaroxaban 15 mg / 1 tab(s) Oral Daily	15	72	F	102	1.6	39.8437	NO	NKA	NO	NONE	NONE	NONE	NONE	NONE	RIVA	NO	HTN, DM, DLD, AFIB, MILD LVSD, DIASTOLIC DYSFUNCTION GRADE 2, MOD - TO SEVERE PULM. HTN, HIGH CHADSVASC SCORE	18	18	199	35.22	17.2	59	143.684	NONE	NONE	NONE	YES, HIGH SCORE	NONE	0	0	0	0	0	1	0	0	0	1	1		NONE	NONE
00-50-02-74	rivaroxaban 15 mg / 1 tab(s) Oral Daily	15	72	M	90	1.64	33.4622	NO	PROMETHAZINE AND CODEINE	NO	NONE	NONE	NONE	NONE	NONE	RIVA	ASA/ CLOPIDOGRIL	DM, HTN, IHD, COPD, HF MOD LVSD, ANEMIA	35	14	99	34	12	85	88	NONE	NONE	NONE	NONE	NONE	0	0	0	0	0	1	0	0	1	0	1		NONE	NONE
00-21-24-85	rivaroxaban 15 mg / 1 tab(s) Oral Daily	15	72	M	120	1.67	43.0277	NO	VOLTARIN INJ	Yes	RECURRENT	?	NONE	NONE	NONE	RIVA	ASA	IHD, T2DM, HTN, CKD, OBESITY, CHRONIC CELLULITIS, ICMP	24	24	81	33.42	5.32	166	60.0803	NONE	NONE	NONE	NONE	NONE	0	0	0	0	0	1	0	1	0	0	1		NONE	NONE
00-62-43-10	rivaroxaban 15 mg / 1 tab(s) Oral Daily	15	72	F	72	1.61	27.7767	NO	NKA	NO	NONE	NONE	NONE	NONE	NONE	RIVA	NO	PAROX, AIFB, HTN, DM, DLD,	55	26	58	34.57	8.34	127	47.1181	NONE	NONE	NONE	NONE	NONE	0	0	0	0	0	1	1	0	0	0	1		NONE	NONE
00-22-50-31	rivaroxaban 15 mg / 1 tab(s) Oral Daily	15	72	F	61	1.49	27.4762	NO	NKA	NO	NONE	NONE	NONE	NONE	NONE	RIVA	ASA	DM, HTN, DLD, AFIB, STROKE 2 YEARS BACK	30	19	74	35.57	10.42	76	66.7076	NONE	NONE	NONE	NONE	NONE	0	0	0	0	0	0	1	0	0	0	1		NONE	NONE
00-30-48-07	rivaroxaban 15 mg / 1 tab(s) Oral Daily	15	72	F	64	1.49	28.8275	NO	NKA	NO	NONE	NONE	NONE	NONE	NONE	RIVA	NO	AFIB, DM, HTN, CVA, IHD, HEMIPPLEGIA, MI	35	14	99	34	12	85	62.5778	NONE	NONE	NONE	NONE	NONE	0	0	0	0	0	1	0	0	0	0	1		NONE	NONE
00-43-61-43	rivaroxaban 15 mg / 1 tab(s) Oral Daily	15	72	F	80	1.6	31.25	NO	NOT RECORDED	NO	NONE	NONE	NONE	NONE	NONE	RIVA	NO	STROKE, EPILEPSY….	35	14	99	34	12	85	78.2222	NONE	NONE	NONE	NONE	NONE	0	0	0	0	0	0	0	0	0	0	0		NONE	NONE
00-83-80-81	rivaroxaban 15 mg/ 1 tab(s) Oral Daily	15	72	M	65	1.6	25.3906	NO	NKA	NO	NONE	NONE	NONE	NONE	NONE	RIVA	NO	PAROX. AFIB, DLD, DM, HTN, GERD	21	18	88	32.41	4.76	77	70.1587	NONE	NONE	NONE	NONE	NONE	0	0	0	0	0	1	1	0	0	0	1		NONE	NONE
00-80-57-73	rivaroxaban 15 mg/ 1 tab(s) Oral Daily	15	72	F	53	1.45	25.2081	NO	NKA	NO	NONE	NONE	NONE	NONE	NONE	RIVA	NO	CHD, AFIB, IGT, HTN, DLD, HF,	8	15	77	37.65	15.22	76	57.9591	NONE	NONE	NONE	NONE	NONE	0	0	0	0	0	1	0	0	0	1	0		NONE	NONE
00-12-34-32	rivaroxaban 15 mg/ 1 tab(s) Oral Daily	15	72	F	57	1.59	22.5466	NO	NKA	NO	NONE	NONE	NONE	NONE	NONE	RIVA	NO	TKR	35	14	99	34	12	85	55.7333	NONE	NONE	NONE	NONE	NONE	0	0	0	0	0	0	0	0	0	0	0		NONE	NONE
10-07-27-89	20 mg daily	20	72	female	73	1.65	26.8136	NO	NKA	no			yes			rivaroxaban	None	Afib, DM, HTN, Dementia	14	22	120	21.77	8.11	56	108.341	NONE	NONE	NONE	NONE	NONE	0	0	0	0	0	1	0	0	0	1	1		NONE	NONE
10-10-78-56	20 mg daily	20	72	female	80	1.6	31.25	NO	NKA	no			yes			rivaroxaban	None		25	15	125	35	8.07	78	85.2422	NONE	NONE	NONE	NONE	NONE	0	0	0	0	0	1	0	0	0	0	1		NONE	NONE
10-19-75-39	20 mg daily	20	72	male	85	1.67	30.478	NO	amoxicillin	no			yes			rivaroxaban	None	PVD, DM, HTN, Bilateral knee osteoarthritis, Afib, Spinal disc herniation	49	17	124	35.11	6.6	60	117.741	NONE	NONE	NONE	NONE	NONE	0	0	0	0	0	1	0	0	0	0	1		NONE	NONE
10-24-53-65	20 mg daily	20	72	female	88	1.48	40.1753	NO	NKA	yes		PE	no			rivaroxaban	None	HTN, DLD, PE, impaired LV relaxation	17	23	60	34.89	5.12	55	132.978	NONE	NONE	NONE	NONE	NONE	0	0	0	0	0	1	1	0	0	0	0		NONE	NONE
00-98-45-81	20 mg daily	20	72	female	76	1.6	29.6875	NO	NKA	no			yes			rivaroxaban	None	IHD, HTN, DM, Afib	41	0	0	33.5	6.85	69	91.5427	NONE	NONE	NONE	NONE	NONE	0	0	0	0	0	1	1	0	0	0	0		NONE	NONE
01-11-78-43	20 mg daily	20	72	female	69.8	1.462	32.6558	NO	NKA	no			yes			rivaroxaban	None	HTN, DM, Afib, OA	17	11	82	37.2	7.93	82	70.7458	NONE	NONE	NONE	NONE	NONE	0	0	0	0	0	1	0	0	0	0	0		NONE	NONE
10-07-47-45	20 mg daily	20	72	female	104	1.58	41.66	NO	NKA	no			yes			rivaroxaban	None	HF, Afib, DM, HTN, asthma, obesity	16	14	176	35.82	14.17	105	82.3196	NONE	NONE	NONE	NONE	NONE	0	0	0	0	0	0	0	0	0	0	0		NONE	NONE
10-19-47-31	20 mg daily	20	72	female	83.6	1.595	32.8613	NO	NKA	no			yes			rivaroxaban	None	Afib, hyperthyroidism	11	12	113	40.22	6.44	58	119.795	NONE	NONE	NONE	NONE	NONE	0	0	0	0	0	0	0	0	0	0	0		NONE	NONE
10-05-12-29	20 mg daily	20	72	male	107.2	1.67	38.4381	yes	NKA	no			yes		AF WITH PEACE MAKER	rivaroxaban	None	IHD, DM, AF	34	28	95	36	13.03	107	83.2665	NONE	NONE	NONE	NONE	NONE	0	0	0	0	0	0	0	0	0	0	0		NONE	NONE
01-11-64-19	20 mg daily	20	72	female	71	1.5	31.5556	NO	NKA	yes		DVT	yes			rivaroxaban	None	IHD, HTN, TKR	24	18	112	34	7.57	68	86.7778	NONE	NONE	NONE	NONE	NONE	0	0	0	0	0	0	0	0	0	0	0		NONE	NONE
10-13-28-68	20 mg oral tablet, 1 tab(s), Oral, qPM	20	72	female	69	1.49	31.0797	NO	NKA	no			yes		a-fib	rivaroxiban	None	HTN,DM,DLP	28	14	99	32	10.05	51	112.444	NONE	NONE	NONE	NONE	NONE	0	0	0	0	0	1	1	0	0	0	1		NONE	NONE
00-59-26-68		20	72	F	85	1.65	31.2213	NO	NKA	NO	NONE	NONE	NONE	NONE	NONE	RIVA	NO	TKR	7	11	74	23.87	6.31	90	78.4938	NONE	NONE	NONE	NONE	NONE	0	0	0	0	0	0	0	0	0	0	0		NONE	NONE
00-00-02-37	rivaroxaban 20 mg / 1 tab(s) Oral QPM	20	72	F	86	1.59	34.0176	NO	MUSHROOM, PERFUMES	NO	NONE	NONE	NONE	NONE	NONE	Rivaroxaban	ASA	OSTEOPOROSIS, PALPITAION, AFIB	20	18	36	39.19	8.35	71	100.67	NONE	NONE	NONE	NONE	NONE	0	0	0	0	0	0	0	0	0	0	0		NONE	NONE
00-87-64-87	rivaroxaban 20 mg/ 1 tab(s) Oral Daily	20	72	M	70	1.62	26.6728	NO	NKA	NO	NONE	NONE	None	None	None	Rivaroxaban	Clopidogril	DM, HTN	14	22	190	22.81	13.3	74	78.6186	None	None	None	None	None	0	0	0	0	0	1	1	0	1	1	1		NONE	NONE
00-82-75-44	rivaroxaban 20 mg/ 1 tab(s) Oral Daily	20	72	M	71	1.66	25.7657	NO	NKA	NO	NONE	NONE	NONE	NONE	NONE	RIVA	NO	HTN, DM, AFIB, DIASTOLIC HF TYPE II	21	18	96	39.15	9.9	86	68.615	NONE	NONE	NONE	NONE	NONE	0	0	0	0	0	1	0	1	1	0	1		NONE	NONE
00-57-83-11	rivaroxaban 20 mg/ 1 tab(s) Oral Daily	20	72	F	68.3	1.55	28.4287	NO	NKA	NO	NONE	NONE	NONE	NONE	NONE	RIVA	NO	DM, HTN, AFIB, HFPEF,	22	16	75	31.78	13.71	71	79.9505	NONE	NONE	NONE	NONE	NONE	0	0	0	0	0	1	0	0	1	0	1		NONE	NONE
00-79-47-15	rivaroxaban 20 mg/ 1 tab(s) Oral Daily	20	72	F	130	1.75	42.449	NO	PENICILLIN	NO	NONE	NONE	NONE	NONE	NONE	RIVA	NO	DM, HTN, DLD, POST OP ANKLE FRACTURE DISLOCATION, ON WHEEL CHAIR	35	14	99	34	12	85	127.111	NONE	NONE	NONE	NONE	NONE	0	0	0	0	0	1	1	0	0	0	1		NONE	NONE
00-60-38-73	rivaroxaban 20 mg/ 1 tab(s) Oral Daily	20	72	M	98	1.66	35.5639	NO	NKA	NO	NONE	NONE	NONE	NONE	NONE	RIVA	ASA	DM, HTN, IHD, CERVICAL SPONDYLOSIS	28	18	66	39.47	8.8	80	101.811	NONE	NONE	NONE	NONE	NONE	0	0	0	0	0	1	0	0	0	0	1		NONE	NONE
00-73-59-60	rivaroxaban 20 mg/ 1 tab(s) Oral Daily	20	72	F	85	1.56	34.9277	NO	NKA	NO	NONE	NONE	NONE	NONE	NONE	RIVA	NO	DM, HTN, OSA, AFIB, BA, ASCITIS	35	14	99	34	12	85	83.1111	NONE	NONE	NONE	NONE	NONE	0	0	0	0	0	1	0	0	0	0	1		NONE	NONE
00-48-48-11	rivaroxaban 20 mg/ 1 tab(s) Oral Daily	20	72	F	65	1.5	28.8889	NO	NKA	NO	NONE	NONE	NONE	NONE	NONE	RIVA	NO	COPD, DLD, DIASTOLIC DYSFUNCTION, ILD, OSA OBSTRUCTIVE SLEEP APNEA, OSTEOPOROSIS, PULMONARY HTN.AFIB, GERD	16	17	97	30.64	3.82	54	100.041	NONE	NONE	NONE	NONE	NONE	0	0	0	0	0	1	0	0	0	1	0		NONE	NONE
00-28-40-31	rivaroxaban 20 mg/ 1 tab(s) Oral Daily	20	72	F	133	1.58	53.2767	NO	NKA	NO	NONE	NONE	NONE	NONE	NONE	RIVA	NO	SLE, DLD, AFIB, HTN, HYPOTHYROIDISM, OBESITY, TIA, OSTEOPENIA	24	21	92	39.47	13.2	102	108.37	NONE	NONE	NONE	NONE	NONE	0	0	0	0	0	1	0	1	0	0	0		NONE	NONE
10-22-02-84	10 mg daily	10	73	female	56.5	1.57	22.9218	NO	NKA	no			no			rivaroxaban	None	HTN, knee pain	28	24	70	27.55	9.28	44	105.153	NONE	NONE	NONE	NONE	NONE	0	0	0	0	0	1	0	0	0	0	0		NONE	NONE
10-22-21-51	10 mg daily	10	73	female	54	1.54	22.7694	NO	NKA	no			no			rivaroxaban	None	hip fracture, POST HEMIARTHROPLASTY LEFT, HTN	20	24	82	28.42	7.61	93	47.5484	NONE	NONE	NONE	NONE	NONE	0	0	0	0	0	1	0	0	0	0	0		NONE	NONE
10-16-65-73	10 mg daily	10	73	female	72	1.4	36.7347	NO	banana, dust	no			no			rivaroxiban	None	TKR, HTN	21	23	34	28.11	13	39	151.179	NONE	NONE	NONE	NONE	NONE	0	0	0	0	0	1	0	0	0	0	0		NONE	NONE
01-17-85-61	10 mg ora qpm	10	73	male	63	1.62	24.0055	NO	NKA	yes		DVT,PE	NO			rivaroxiban	None	LIVER CIRRHOIS , BPH , PE , DVT	26	7	79	36.28	12.82	62	83.2097	NONE	NONE	NONE	NONE	NONE	0	0	0	0	0	0	0	0	0	0	0		NONE	NONE
10-15-73-90	10 mg oral daily	10	73	female	82	1.45	39.0012	NO	NKA	no			no			rivaroxiban	None	TKR,DM,HTN	12	26	113	26.64	8.86	62	108.305	NONE	NONE	NONE	NONE	NONE	0	0	0	0	0	1	0	0	0	0	1		NONE	NONE
00-19-07-78	rivaroxaban 10 mg/ 1 tab(s) Oral Daily	10	73	F	78	1.51	34.209	NO	NKA	NO	NONE	NONE	NONE	NONE	NONE	RIVA	ASA	DM, DLD, HTN, TKR, HYPOTHYROIDISM, RENAL IMPAIRMENT	16	13	89	34.88	7.34	105	60.8317	NONE	NONE	NONE	NONE	NONE	0	0	0	0	0	1	1	1	0	0	1		NONE	NONE
00-79-54-91	rivaroxaban 10 mg/ 1 tab(s) Oral Daily	10	73	F	63.1	1.54	26.6065	NO	NKA	NO	NONE	NONE	NONE	NONE	NONE	RIVA	NO	HTN, DM, TKR, PCI	35	14	99	34	12	85	60.7905	NONE	NONE	NONE	NONE	NONE	0	0	0	0	0	1	0	0	0	0	1		NONE	NONE
00-27-02-25	rivaroxaban 10 mg/ 1 tab(s) Oral Daily	10	73	M	99	1.68	35.0765	NO	NKA	NO	NONE	NONE	NONE	NONE	NONE	RIVA	NO	OA, DM, TKR	35	14	99	34	12	85	95.3765	NONE	NONE	NONE	NONE	NONE	0	0	0	0	0	1	0	0	1	1	0		NONE	NONE
00-56-04-74	rivaroxaban 10 mg/ 1 tab(s) Oral Daily	10	73	F	60	1.45	28.5375	NO	NKA	NO	NONE	NONE	NONE	NONE	NONE	RIVA	NO	HTN, ADVANCED OA, DISCECTOMY, TKR	56	32	120	31.03	5.32	93	52.8315	NONE	NONE	NONE	NONE	NONE	0	0	0	0	0	1	0	0	0	0	0		NONE	NONE
00-15-97-41	rivaroxaban 10 mg/ 1 tab(s) Oral Daily	10	73	M	85	1.67	30.478	NO	NKA	NO	NONE	NONE	NONE	NONE	NONE	RIVA	NO	LEFT TKR	17	76	80	30.52	12.56	111	62.7077	NONE	NONE	NONE	NONE	NONE	0	0	0	0	0	0	0	0	0	0	0		NONE	NONE
10-00-30-74	15 mg daily	15	73	male	69.2	1.62	26.3679	NO	NKA	no			yes			rivaroxaban	None	HTN, IHD, PERICARDIAL EFFUSION, Afib, MASSIVE EPISTAXIS	22	28	151	24	33.69	107	52.9599	NONE	NONE	NONE	NONE	NONE	0	0	0	0	0	0	0	0	0	1	1		NONE	NONE
10-24-97-31	15 mg daily	15	73	female	76.7	1.6	29.9609	NO	egg	no			yes			rivaroxaban	None	CABG, Afib, IHD, HF, HTN, DM, asthma, CKD, BPH	20	36	102	26.13	6.59	200	31.4044	NONE	NONE	NONE	NONE	NONE	0	0	0	0	0	1	1	1	0	0	1		NONE	NONE
00-93-21-91	15 mg daily	15	73	female	80	1.6	31.25	NO	NKA	no			no			Rivaroxaban	None	HTN, Type 2 DM ,	26	0	0	24.9	7.09	33	198.519	NONE	NONE	NONE	NONE	NONE	0	0	0	0	0	1	0	0	0	0	0		NONE	NONE
10-15-80-41	15 mg oral daily	15	73	male	95.5	1.7	33.045	NO	NKA	no			yes		a-fib	rivaroxiban	aspirin 81 mg , clopidogreL 75 mg	DM,HTN,CKD,ISCHEMIC CARDIOMYOPATHY AND BIVENTRICULAR HEART FAILURE	16	8	77	36.3	10.16	314	24.9057	NONE	NONE	NONE	NONE	NONE	0	0	0	0	0	1	1	1	0	0	1		NONE	NONE
10-13-46-98	15 mg oral daily	15	73	female	63.5	1.43	31.0529	NO	NKA	no			no			rivaroxiban	aspirin 81 mg , plavix 75 mg	HTN,IHD,CABG	29	28	174	30.47	5.16	72	72.2215	NONE	NONE	NONE	NONE	NONE	0	0	0	0	0	0	0	0	0	0	1		NONE	NONE
00-66-96-58	rivaroxaban 15 mg / 1 tab(s) Oral Daily	15	73	F	80.1	1.61	30.9016	NO	NKA	NO	NONE	NONE	NONE	NONE	NONE	RIVA	NO	HTN, DM, HYPOTHYROIDISM, AFIB, CHF, CKD, IHD, OSTEOPOROSIS	25	21	37	30.6	4.9	146	44.9267	NONE	NONE	NONE	NONE	NONE	0	0	0	0	0	1	1	0	0	1	1		NONE	NONE
00-28-26-73	rivaroxaban 15 mg / 1 tab(s) Oral Daily	15	73	F	61	1.65	22.4059	NO	NKA	NO	NONE	NONE	NONE	NONE	NONE	RIVA	NO	DM, HTN, IHD, HEPEF, AFIB, PVD, BA, DIABETIC FOOT.	35	14	99	34	12	85	58.7673	NONE	NONE	NONE	NONE	NONE	0	0	0	0	0	1	0	0	1	0	1		NONE	NONE
00-69-24-30	rivaroxaban 15 mg / 1 tab(s) Oral Daily	15	73	M	96	1.65	35.2617	YES	NKA	NO	NONE	NONE	NONE	NONE	NONE	RIVA	NO	T2DM. HTN, DLD , AFIB,	35	14	99	34	12	85	92.4863	NONE	NONE	NONE	NONE	NONE	0	0	0	0	0	1	1	0	0	0	1		NONE	NONE
00-19-61-95	rivaroxaban 15 mg / 1 tab(s) Oral Daily	15	73	M	91.7	1.63	34.5139	NO	NKA	NO	NONE	NONE	NONE	NONE	NONE	RIVA	ASA	DM, HTN, AF AND DLD, RENAL STONE	35	14	99	34	12	85	88.3437	NONE	NONE	NONE	NONE	NONE	0	0	0	0	0	0	1	0	0	0	1		NONE	NONE
00-13-99-75	rivaroxaban 15 mg / 1 tab(s) Oral Daily	15	73	F	99	1.472	45.6898	NO	AMLODIPINE	NO	NONE	NONE	NONE	NONE	NONE	RIVA	NO	HTN, ASTHMA, FATTY LIVER, OBESITY, OSTEOPOROSIS, UNILATERAL NEPHRECTOMY, VIT. D DEFFICIENCY.	19	16	78	29.67	12.48	83	97.6747	NONE	NONE	NONE	NONE	NONE	0	0	0	0	0	1	0	0	0	0	0		NONE	NONE
10-24-97-31	rivaroxaban 15 mg / 1 tab(s) Oral QPM	15	73	M	86	1.6	33.5937	NO	NKA	NO	NONE	NONE	NONE	NONE	NONE	Rivaroxaban	Aspirin	DM, HTN, IHD, AFIB, CKD?, BA?	33	37	152	25.97	7.67	205	34.3534	None	None	None	None	None	0	0	0	0	0	1	1	0	0	1	1		NONE	NONE
00-03-39-40	rivaroxaban 15 mg / 1 tab(s) Oral QPM	15	73	F	47	1.547	19.6389	NO	NKA	NO	NONE	NONE	NONE	NONE	NONE	RIVA	NO	HTN, DLD, HYPOTHYROIDISM, PAROXYSMAL AFIB,	24	16	73	32.62	6.61	69	55.7794	NONE	NONE	NONE	NONE	NONE	0	0	0	0	0	1	0	1	0	0	0		NONE	NONE
00-81-11-69	rivaroxaban 15 mg / 1 tab(s) Tab Oral qPM	15	73	F	74.2	1.65	27.2544	NO	NKA	NO	NONE	NONE	None	None	None	Rivaroxaban	Aspirin	HTN, DLD, BA, NSTEMI, ADMITTED AS CASE OF ADHF	39	45	74	35.22	10.27	73	83.235	None	None	None	None	None	0	0	0	0	0	1	0	0	1	1	1		NONE	NONE
[truncated: 650 more rows]
